# Supplementary material for: A serendipity-biased Deepwalk for collaborators recommendation
Source: PeerJ Comput Sci. 2019 Mar 4;5:e178. doi: 10.7717/peerj-cs.178 (PMC7924530; doi:10.7717/peerj-cs.178)
Supplement: Data S1 — Each raw includes the coauthor list, the year of publishing, the title of the publised paper, and the conference in which this paper was published. [file peerj-cs-05-178-s001.csv]

2078008	Bing_Xiang,Abraham_Ittycheriah	2011	Discriminative Feature-Tied Mixture Modeling for Statistical Machine Translation.	db/conf/acl/acl2011s.html#XiangI11
2078018	Eneko_Agirre,Kepa_Bengoetxea,Koldo_Gojenola,Joakim_Nivre	2011	Improving Dependency Parsing with Semantic Classes.	db/conf/acl/acl2011s.html#AgirreBGN11
2078025	Vincent_Ng	2010	Supervised Noun Phrase Coreference Research: The First Fifteen Years.	db/conf/acl/acl2010.html#Ng10
2078031	Seth_Kulick,Ann_Bies,Justin_Mott	2011	Using Derivation Trees for Treebank Error Detection.	db/conf/acl/acl2011s.html#KulickBM11
2078032	Richard_Socher,Yoshua_Bengio,Christopher_D._Manning	2012	Deep Learning for NLP (without Magic).	db/conf/acl/acl2012t.html#SocherBM12
2078039	Yansong_Feng,Mirella_Lapata	2010	How Many Words Is a Picture Worth? Automatic Caption Generation for News Images.	db/conf/acl/acl2010.html#FengL10
2078041	Amjad_Abu-Jbara,Dragomir_R._Radev	2011	Coherent Citation-Based Summarization of Scientific Papers.	db/conf/acl/acl2011.html#Abu-JbaraR11
2078050	Jinho_D._Choi,Martha_Palmer	2011	Getting the Most out of Transition-based Dependency Parsing.	db/conf/acl/acl2011s.html#ChoiP11
2078055	Jonathan_Berant,Ido_Dagan,Jacob_Goldberger	2010	Global Learning of Focused Entailment Graphs.	db/conf/acl/acl2010.html#BerantDG10
2078056	Stephen_Tyndall	2012	Toward Automatically Assembling Hittite-Language Cuneiform Tablet Fragments into Larger Texts.	db/conf/acl/acl2012-2.html#Tyndall12
2078057	Tony_Veale,Guofu_Li	2012	Specifying Viewpoint and Information Need with Affective Metaphors: A System Demonstration of the Metaphor-Magnet Web App/Service.	db/conf/acl/acl2012d.html#VealeL12
2078063	Michael_Collins,Alexander_M._Rush	2011	Dual Decomposition for Natural Language Processing.	db/conf/acl/acl2011t.html#CollinsR11
2078066	Jonathan_K._Kummerfeld,Dan_Klein,James_R._Curran	2012	Robust Conversion of CCG Derivations to Phrase Structure Trees.	db/conf/acl/acl2012-2.html#KummerfeldKC12
2078070	Shay_B._Cohen,Karl_Stratos,Michael_Collins,Dean_P._Foster,Lyle_H._Ungar	2012	Spectral Learning of Latent-Variable PCFGs.	db/conf/acl/acl2012-1.html#CohenSCFU12
2078072	Galina_Tremper	2010	Weakly Supervised Learning of Presupposition Relations between Verbs.	db/conf/acl/acl2010r.html#Tremper10
2078073	Hao_Wang_0029,Dogan_Can,Abe_Kazemzadeh,ois_Bar,Shrikanth_Narayanan	2012	A System for Real-time Twitter Sentiment Analysis of 2012 U.S. Presidential Election Cycle.	db/conf/acl/acl2012d.html#WangCKBN12
2078092	Katrin_Tomanek,Udo_Hahn,Steffen_Lohmann,rgen_Ziegler_0001	2010	A Cognitive Cost Model of Annotations Based on Eye-Tracking Data.	db/conf/acl/acl2010.html#TomanekHLZ10
2078099	Apoorv_Agarwal	2011	Social Network Extraction from Texts: A Thesis Proposal.	db/conf/acl/acl2011r.html#Agarwal11
2078103	Xinyan_Xiao,Deyi_Xiong,Min_Zhang_0005,Qun_Liu,Shouxun_Lin	2012	A Topic Similarity Model for Hierarchical Phrase-based Translation.	db/conf/acl/acl2012-1.html#XiaoXZLL12
2078131	Yaqin_Yang,Nianwen_Xue	2012	Chinese Comma Disambiguation for Discourse Analysis.	db/conf/acl/acl2012-1.html#YangX12
2078147	elikyilmaz,r	2012	A Joint Model for Discovery of Aspects in Utterances.	db/conf/acl/acl2012-1.html#CelikyilmazH12
2078150	Sittichai_Jiampojamarn,Grzegorz_Kondrak	2010	Letter-Phoneme Alignment: An Exploration.	db/conf/acl/acl2010.html#JiampojamarnK10
2078158	Hassan_Sajjad,Alexander_M._Fraser,Helmut_Schmid	2012	A Statistical Model for Unsupervised and Semi-supervised Transliteration Mining.	db/conf/acl/acl2012-1.html#SajjadFS12
2078161	Adam_Vogel,Daniel_Jurafsky	2010	Learning to Follow Navigational Directions.	db/conf/acl/acl2010.html#VogelJ10
2078163	Ryo_Nagata,Edward_W._D._Whittaker,Vera_Sheinman	2011	Creating a manually error-tagged and shallow-parsed learner corpus.	db/conf/acl/acl2011.html#NagataWS11
2078171	Amit_Dubey	2010	The Influence of Discourse on Syntax: A Psycholinguistic Model of Sentence Processing.	db/conf/acl/acl2010.html#Dubey10
2078176	Hui_Lin,Jeff_A._Bilmes	2011	Word Alignment via Submodular Maximization over Matroids.	db/conf/acl/acl2011s.html#LinB11a
2078177	Jia_Wang,Qing_Li,Yuanzhu_Peter_Chen,Zhangxi_Lin	2010	Recommendation in Internet Forums and Blogs.	db/conf/acl/acl2010.html#WangLCL10
2078180	Markus_Dickinson	2010	Detecting Errors in Automatically-Parsed Dependency Relations.	db/conf/acl/acl2010.html#Dickinson10
2078186	Pierre_Lison	2010	Towards Relational POMDPs for Adaptive Dialogue Management.	db/conf/acl/acl2010r.html#Lison10
2078189	Harr_Chen,Edward_Benson,Tahira_Naseem,Regina_Barzilay	2011	In-domain Relation Discovery with Meta-constraints via Posterior Regularization.	db/conf/acl/acl2011.html#ChenBNB11
2078192	S._R._K._Branavan,Luke_S._Zettlemoyer,Regina_Barzilay	2010	Reading between the Lines: Learning to Map High-Level Instructions to Commands.	db/conf/acl/acl2010.html#BranavanZB10
2078196	gaard	2010	Simple Semi-Supervised Training of Part-Of-Speech Taggers.	db/conf/acl/acl2010s.html#Sogaard10
2078202	Margaret_Mitchell,Aaron_Dunlop,Brian_Roark	2011	Semi-Supervised Modeling for Prenominal Modifier Ordering.	db/conf/acl/acl2011s.html#MitchellDR11
2078214	Vishal_Goyal,Gurpreet_Singh_Lehal	2011	Hindi to Punjabi Machine Translation System.	db/conf/acl/acl2011d.html#GoyalL11
2078217	David_Leo_Wright_Hall,Dan_Klein	2010	Finding Cognate Groups Using Phylogenies.	db/conf/acl/acl2010.html#HallK10
2078223	Claire_Gardent,Shashi_Narayan	2012	Error Mining on Dependency Trees.	db/conf/acl/acl2012-1.html#GardentN12
2078242	Jayant_Krishnamurthy,Tom_M._Mitchell	2011	Which Noun Phrases Denote Which Concepts?	db/conf/acl/acl2011.html#KrishnamurthyM11
2078244	Houda_Bouamor,lien_Max,Anne_Vilnat	2011	Monolingual Alignment by Edit Rate Computation on Sentential Paraphrase Pairs.	db/conf/acl/acl2011s.html#BouamorMV11
2078252	Wenting_Xiong,Diane_J._Litman	2011	Automatically Predicting Peer-Review Helpfulness.	db/conf/acl/acl2011s.html#XiongL11
2078257	Joel_R._Tetreault,Jennifer_Foster,Martin_Chodorow	2010	Using Parse Features for Preposition Selection and Error Detection.	db/conf/acl/acl2010s.html#TetreaultFC10
2078258	Guangyou_Zhou,Li_Cai,Jun_Zhao_0001,Kang_Liu_0001	2011	Phrase-Based Translation Model for Question Retrieval in Community Question Answer Archives.	db/conf/acl/acl2011.html#ZhouCZL11
2078266	Vamshi_Ambati,Stephan_Vogel,Jaime_G._Carbonell	2010	Active Learning-Based Elicitation for Semi-Supervised Word Alignment.	db/conf/acl/acl2010s.html#AmbatiVC10
2078271	Preslav_Nakov,rg_Tiedemann	2012	Combining Word-Level and Character-Level Models for Machine Translation Between Closely-Related Languages.	db/conf/acl/acl2012-2.html#NakovT12
2078278	Shujie_Liu_0001,Chi-Ho_Li,Ming_Zhou	2010	Discriminative Pruning for Discriminative ITG Alignment.	db/conf/acl/acl2010.html#LiuLZ10
2078282	Amitava_Das,Sivaji_Bandyopadhyay	2011	Dr Sentiment Knows Everything!	db/conf/acl/acl2011d.html#DasB11
2078283	nez,Luis_A._Leiva,Vicent_Alabau,a-Varea,Francisco_Casacuberta	2011	An Interactive Machine Translation System with Online Learning.	db/conf/acl/acl2011d.html#Ortiz-MartinezLAGC11
2078292	Omar_Zaidan,Chris_Callison-Burch	2011	The Arabic Online Commentary Dataset: an Annotated Dataset of Informal Arabic with High Dialectal Content.	db/conf/acl/acl2011s.html#ZaidanC11a
2078298	Kapil_Thadani,Kathleen_McKeown	2011	Optimal and Syntactically-Informed Decoding for Monolingual Phrase-Based Alignment.	db/conf/acl/acl2011s.html#ThadaniM11
2078302	N,U,L,L	2012	Front Matter.	db/conf/acl/acl2012-1.html#X12b
2078303	Chris_Dyer,Adam_Lopez,Juri_Ganitkevitch,Jonathan_Weese,re,Phil_Blunsom,Hendra_Setiawan,Vladimir_Eidelman,Philip_Resnik	2010	cdec: A Decoder, Alignment, and Learning Framework for Finite-State and Context-Free Translation Models.	db/conf/acl/acl2010d.html#DyerLGWTBSER10
2078307	Dan_Goldwasser,Roi_Reichart,James_Clarke,Dan_Roth	2011	Confidence Driven Unsupervised Semantic Parsing.	db/conf/acl/acl2011.html#GoldwasserRCR11
2078320	Chris_Dyer,Jonathan_H._Clark,Alon_Lavie,Noah_A._Smith	2011	Unsupervised Word Alignment with Arbitrary Features.	db/conf/acl/acl2011.html#DyerCLS11
2078324	John_Lee,Jonathan_J._Webster	2012	A Corpus of Textual Revisions in Second Language Writing.	db/conf/acl/acl2012-2.html#LeeW12
2078325	Myroslava_O._Dzikovska,Johanna_D._Moore,Natalie_B._Steinhauser,Gwendolyn_E._Campbell,Elaine_Farrow,Charles_B._Callaway	2010	Beetle II: A System for Tutoring and Computational Linguistics Experimentation.	db/conf/acl/acl2010d.html#DzikovskaMSCFC10
2078333	Hitoshi_Nishikawa,Takaaki_Hasegawa,Yoshihiro_Matsuo,Gen-ichiro_Kikui	2010	Optimizing Informativeness and Readability for Sentiment Summarization.	db/conf/acl/acl2010s.html#NishikawaHMK10
2078337	Jingbo_Zhu,Tong_Xiao,Chunliang_Zhang	2012	Learning Better Rule Extraction with Translation Span Alignment.	db/conf/acl/acl2012-2.html#ZhuXZ12
2078346	Kenji_Imamura,Kuniko_Saito,Kugatsu_Sadamitsu,Hitoshi_Nishikawa	2012	Grammar Error Correction Using Pseudo-Error Sentences and Domain Adaptation.	db/conf/acl/acl2012-2.html#ImamuraSSN12
2078348	Weiwei_Guo,Mona_T._Diab	2012	Modeling Sentences in the Latent Space.	db/conf/acl/acl2012-1.html#GuoD12
2078356	Ivan_Titov	2011	Domain Adaptation by Constraining Inter-Domain Variability of Latent Feature Representation.	db/conf/acl/acl2011.html#Titov11
2078360	Partha_Pratim_Talukdar,Fernando_C._N._Pereira	2010	Experiments in Graph-Based Semi-Supervised Learning Methods for Class-Instance Acquisition.	db/conf/acl/acl2010.html#TalukdarP10
2078374	Marco_Kuhlmann,Alexander_Koller,Giorgio_Satta	2010	The Importance of Rule Restrictions in CCG.	db/conf/acl/acl2010.html#KuhlmannKS10
2078382	Taro_Watanabe,Eiichiro_Sumita	2011	Machine Translation System Combination by Confusion Forest.	db/conf/acl/acl2011.html#WatanabeS11
2078399	Deyi_Xiong,Min_Zhang_0005,Haizhou_Li	2012	Modeling the Translation of Predicate-Argument Structure for SMT.	db/conf/acl/acl2012-1.html#XiongZL12
2078403	Alessandro_Moschitti	2012	State-of-the-Art Kernels for Natural Language Processing.	db/conf/acl/acl2012t.html#Moschitti12
2078405	Lev-Arie_Ratinov,Dan_Roth,Doug_Downey,Mike_Anderson	2011	Local and Global Algorithms for Disambiguation to Wikipedia.	db/conf/acl/acl2011.html#RatinovRDA11
2078408	Shu_Cai,David_Chiang,Yoav_Goldberg	2011	Language-Independent Parsing with Empty Elements.	db/conf/acl/acl2011s.html#CaiCG11
2078411	Coskun_Mermer,Ahmet_Afsn_Akn	2010	Unsupervised Search for the Optimal Segmentation for Statistical Machine Translation.	db/conf/acl/acl2010r.html#MermerA10
2078413	Andreas_Maletti	2010	A Tree Transducer Model for Synchronous Tree-Adjoining Grammars.	db/conf/acl/acl2010.html#Maletti10
2078415	Zhiheng_Huang,Yi_Chang,Bo_Long,ois_Crespo,Anlei_Dong,Sathiya_Keerthi,Su-Lin_Wu	2012	Iterative Viterbi A* Algorithm for K-Best Sequential Decoding.	db/conf/acl/acl2012-1.html#HuangCLCDKW12
2078417	Steffen_Hedegaard,Jakob_Grue_Simonsen	2011	Lost in Translation: Authorship Attribution using Frame Semantics.	db/conf/acl/acl2011s.html#HedegaardS11
2078427	N,U,L,L	2012	Front Matter.	db/conf/acl/acl2012d.html#X12a
2078434	Amjad_Abu-Jbara,Dragomir_R._Radev	2011	Clairlib: A Toolkit for Natural Language Processing, Information Retrieval, and Network Analysis.	db/conf/acl/acl2011d.html#Abu-JbaraR11a
2078437	Shih-Hsiang_Lin,Berlin_Chen	2010	A Risk Minimization Framework for Extractive Speech Summarization.	db/conf/acl/acl2010.html#LinC10
2078440	Xiaohua_Liu,Furu_Wei,Ming_Zhou	2012	QuickView: NLP-based Tweet Search.	db/conf/acl/acl2012d.html#LiuWZ12
2078441	Peng_Cai,Wei_Gao,Aoying_Zhou,Kam-Fai_Wong	2011	Query Weighting for Ranking Model Adaptation.	db/conf/acl/acl2011.html#CaiGZW11
2078447	Ashish_Vaswani,Haitao_Mi,Liang_Huang,David_Chiang	2011	Rule Markov Models for Fast Tree-to-String Translation.	db/conf/acl/acl2011.html#VaswaniMHC11
2078461	Ashwin_Ittoo,Gosse_Bouma	2010	On Learning Subtypes of the Part-Whole Relation: Do Not Mix Your Seeds.	db/conf/acl/acl2010.html#IttooB10
2078472	Jinho_D._Choi,Martha_Palmer	2012	Fast and Robust Part-of-Speech Tagging Using Dynamic Model Selection.	db/conf/acl/acl2012-2.html#ChoiP12
2078487	Preslav_Nakov,Hwee_Tou_Ng	2011	Translating from Morphologically Complex Languages: A Paraphrase-Based Approach.	db/conf/acl/acl2011.html#NakovN11
2078491	Thin_Nguyen	2010	Mood Patterns and Affective Lexicon Access in Weblogs.	db/conf/acl/acl2010r.html#Nguyen10
2078496	Yuening_Hu,Jordan_L._Boyd-Graber,Brianna_Satinoff	2011	Interactive Topic Modeling.	db/conf/acl/acl2011.html#HuBS11
2078497	Wen-Tai_Hsieh,Chen_Ming_Wu,Tsun_Ku,Seng-cho_Timothy_Chou	2012	Social Event Radar: A Bilingual Context Mining and Sentiment Analysis Summarization System.	db/conf/acl/acl2012d.html#HsiehWKC12
2078500	Wolfgang_Seeker,Ines_Rehbein,Jonas_Kuhn,Josef_van_Genabith	2010	Hard Constraints for Grammatical Function Labelling.	db/conf/acl/acl2010.html#SeekerRKG10
2078513	Marco_Guerini,Carlo_Strapparava,Oliviero_Stock	2012	Ecological Evaluation of Persuasive Messages Using Google AdWords.	db/conf/acl/acl2012-1.html#GueriniSS12
2078520	Gholamreza_Haffari,Marzieh_Razavi,Anoop_Sarkar	2011	An Ensemble Model that Combines Syntactic and Semantic Clustering for Discriminative Dependency Parsing.	db/conf/acl/acl2011s.html#HaffariRS11
2078536	Sungchul_Kim,Kristina_Toutanova,Hwanjo_Yu	2012	Multilingual Named Entity Recognition using Parallel Data and Metadata from Wikipedia.	db/conf/acl/acl2012-1.html#KimTY12
2078542	Rivka_Levitan,n_Gravano,Julia_Hirschberg	2011	Entrainment in Speech Preceding Backchannels.	db/conf/acl/acl2011s.html#LevitanGH11
2078559	Junhui_Li,Guodong_Zhou,Hwee_Tou_Ng	2010	Joint Syntactic and Semantic Parsing of Chinese.	db/conf/acl/acl2010.html#LiZN10
2078563	Joseph_P._Turian,Lev-Arie_Ratinov,Yoshua_Bengio	2010	Word Representations: A Simple and General Method for Semi-Supervised Learning.	db/conf/acl/acl2010.html#TurianRB10
2078566	Y._Albert_Park,Roger_Levy	2011	Automated Whole Sentence Grammar Correction Using a Noisy Channel Model.	db/conf/acl/acl2011.html#ParkL11
2078570	Rafael_E._Banchs,Haizhou_Li	2012	IRIS: a Chat-oriented Dialogue System based on the Vector Space Model.	db/conf/acl/acl2012d.html#BanchsL12
2078572	Danuta_Ploch	2011	Exploring Entity Relations for Named Entity Disambiguation.	db/conf/acl/acl2011r.html#Ploch11
2078577	l	2011	Optimistic Backtracking - A Backtracking Overlay for Deterministic Incremental Parsing.	db/conf/acl/acl2011r.html#Ytrestol11
2078582	Israela_Becker,Vered_Aharonson	2010	Last but Definitely Not Least: On the Role of the Last Sentence in Automatic Polarity-Classification.	db/conf/acl/acl2010s.html#BeckerA10
2078586	Hirotoshi_Taira,Sanae_Fujita,Masaaki_Nagata	2010	Predicate Argument Structure Analysis Using Transformation Based Learning.	db/conf/acl/acl2010s.html#TairaFN10
2078588	Eduard_C._Dragut,Hong_Wang,Clement_T._Yu,A._Prasad_Sistla,Weiyi_Meng	2012	Polarity Consistency Checking for Sentiment Dictionaries.	db/conf/acl/acl2012-1.html#DragutWYSM12
2078595	Mark_Johnson	2010	PCFGs, Topic Models, Adaptor Grammars and Learning Topical Collocations and the Structure of Proper Names.	db/conf/acl/acl2010.html#Johnson10
2078597	Jeff_Mitchell,Mirella_Lapata,Vera_Demberg,Frank_Keller	2010	Syntactic and Semantic Factors in Processing Difficulty: An Integrated Measure.	db/conf/acl/acl2010.html#MitchellLDK10
2078598	Zhi_Zhong,Hwee_Tou_Ng	2012	Word Sense Disambiguation Improves Information Retrieval.	db/conf/acl/acl2012-1.html#ZhongN12
2078600	Valentin_I._Spitkovsky,Daniel_Jurafsky,Hiyan_Alshawi	2010	Profiting from Mark-Up: Hyper-Text Annotations for Guided Parsing.	db/conf/acl/acl2010.html#SpitkovskyJA10
2078623	t_Sagot,Giorgio_Satta	2010	Optimal Rank Reduction for Linear Context-Free Rewriting Systems with Fan-Out Two.	db/conf/acl/acl2010.html#SagotS10
2078625	Timothy_A._D._Fowler,Gerald_Penn	2010	Accurate Context-Free Parsing with Combinatory Categorial Grammar.	db/conf/acl/acl2010.html#FowlerP10
2078644	Shasha_Liao,Ralph_Grishman	2010	Using Document Level Cross-Event Inference to Improve Event Extraction.	db/conf/acl/acl2010.html#LiaoG10
2078657	Amjad_Abu-Jbara,Dragomir_R._Radev	2012	Subgroup Detector: A System for Detecting Subgroups in Online Discussions.	db/conf/acl/acl2012d.html#Abu-JbaraR12
2078659	S._R._K._Branavan,David_Silver,Regina_Barzilay	2011	Learning to Win by Reading Manuals in a Monte-Carlo Framework.	db/conf/acl/acl2011.html#BranavanSB11
2078663	Klinton_Bicknell,Roger_Levy	2010	A Rational Model of Eye Movement Control in Reading.	db/conf/acl/acl2010.html#BicknellL10
2078665	Gregory_Brown	2011	An Error Analysis of Relation Extraction in Social Media Documents.	db/conf/acl/acl2011r.html#Brown11
2078666	Xianchao_Wu,Katsuhito_Sudoh,Kevin_Duh,Hajime_Tsukada,Masaaki_Nagata	2012	A Comparative Study of Target Dependency Structures for Statistical Machine Translation.	db/conf/acl/acl2012-2.html#WuSDTN12
2078672	lez,nez,rquez	2012	A Graphical Interface for MT Evaluation and Error Analysis.	db/conf/acl/acl2012d.html#GonzalezGM12
2078679	Licheng_Fang,Tagyoung_Chung,Daniel_Gildea	2011	Terminal-Aware Synchronous Binarization.	db/conf/acl/acl2011s.html#FangCG11
2078684	Jeffrey_Heinz,Chetan_Rawal,Herbert_G._Tanner	2011	Tier-based Strictly Local Constraints for Phonology.	db/conf/acl/acl2011s.html#HeinzRT11
2078685	Charles_Greenbacker	2011	Towards a Framework for Abstractive Summarization of Multimodal Documents.	db/conf/acl/acl2011r.html#Greenbacker11
2078695	Xiao_Li	2010	Understanding the Semantic Structure of Noun Phrase Queries.	db/conf/acl/acl2010.html#Li10
2078704	Saif_Mohammad	2011	Even the Abstract have Color: Consensus in Word-Colour Associations.	db/conf/acl/acl2011s.html#Mohammad11
2078705	JinYeong_Bak,Suin_Kim,Alice_H._Oh	2012	Self-Disclosure and Relationship Strength in Twitter Conversations.	db/conf/acl/acl2012-2.html#BakKO12
2078716	Yunyao_Li,Frederick_Reiss,Laura_Chiticariu	2011	SystemT: A Declarative Information Extraction System.	db/conf/acl/acl2011d.html#LiRC11
2078719	Elia_Bruni,Gemma_Boleda,Marco_Baroni,Nam-Khanh_Tran	2012	Distributional Semantics in Technicolor.	db/conf/acl/acl2012-1.html#BruniBBT12
2078720	Benjamin_Wing,Jason_Baldridge	2011	Simple supervised document geolocation with geodesic grids.	db/conf/acl/acl2011.html#WingB11
2078728	Darcey_Riley,Daniel_Gildea	2012	Improving the IBM Alignment Models Using Variational Bayes.	db/conf/acl/acl2012-2.html#RileyG12
2078730	Oleksandr_Kolomiyets,Steven_Bethard,Marie-Francine_Moens	2012	Extracting Narrative Timelines as Temporal Dependency Structures.	db/conf/acl/acl2012-1.html#KolomiyetsBM12
2078742	Jun_Suzuki,Hideki_Isozaki,Masaaki_Nagata	2011	Learning Condensed Feature Representations from Large Unsupervised Data Sets for Supervised Learning.	db/conf/acl/acl2011s.html#SuzukiIN11
2078753	Nathanael_Chambers,Dan_Jurafsky	2011	Template-Based Information Extraction without the Templates.	db/conf/acl/acl2011.html#ChambersJ11
2078754	fer,Bernd_Kiefer,Christian_Spurk,rg_Steffen,Rui_Wang_0005	2011	The ACL Anthology Searchbench.	db/conf/acl/acl2011d.html#SchaferKSSW11
2078757	Mark-Jan_Nederhof,Giorgio_Satta	2011	Prefix Probability for Probabilistic Synchronous Context-Free Grammars.	db/conf/acl/acl2011.html#NederhofS11
2078759	guez,Joakim_Nivre	2010	A Transition-Based Parser for 2-Planar Dependency Structures.	db/conf/acl/acl2010.html#Gomez-RodriguezN10
2078760	Nathan_Bodenstab,Kristy_Hollingshead,Brian_Roark	2011	Unary Constraints for Efficient Context-Free Parsing.	db/conf/acl/acl2011s.html#BodenstabHR11
2078764	Wayne_Xin_Zhao,Jing_Jiang,Jing_He,Yang_Song,Palakorn_Achananuparp,Ee-Peng_Lim,Xiaoming_Li	2011	Topical Keyphrase Extraction from Twitter.	db/conf/acl/acl2011.html#ZhaoJHSALL11
2078769	Yue_Zhang_0013,Joakim_Nivre	2011	Transition-based Dependency Parsing with Rich Non-local Features.	db/conf/acl/acl2011s.html#ZhangN11
2078778	N,U,L,L	2011	Front Matter.	db/conf/acl/acl2011.html#X11
2078785	Truc-Vien_T._Nguyen,Alessandro_Moschitti	2011	End-to-End Relation Extraction Using Distant Supervision from External Semantic Repositories.	db/conf/acl/acl2011s.html#NguyenM11
2078794	Danilo_Croce,Cristina_Giannone,Paolo_Annesi,Roberto_Basili	2010	Towards Open-Domain Semantic Role Labeling.	db/conf/acl/acl2010.html#CroceGAB10
2078801	Yoav_Goldberg,Michael_Elhadad	2011	Joint Hebrew Segmentation and Parsing using a PCFGLA Lattice Parser.	db/conf/acl/acl2011s.html#GoldbergE11
2078802	Sujith_Ravi,Jason_Baldridge,Kevin_Knight	2010	Minimized Models and Grammar-Informed Initialization for Supertagging with Highly Ambiguous Lexicons.	db/conf/acl/acl2010.html#RaviBK10
2078808	Hakan_Ceylan,Rada_Mihalcea	2011	An Efficient Indexer for Large N-Gram Corpora.	db/conf/acl/acl2011d.html#CeylanM11
2078820	Xianchao_Wu,Takuya_Matsuzaki,Jun'ichi_Tsujii	2010	Fine-Grained Tree-to-String Translation Rule Extraction.	db/conf/acl/acl2010.html#WuMT10
2078825	aghdha	2010	Latent Variable Models of Selectional Preference.	db/conf/acl/acl2010.html#Seaghdha10
2078828	Danushka_Bollegala,David_J._Weir,John_A._Carroll	2011	Using Multiple Sources to Construct a Sentiment Sensitive Thesaurus for Cross-Domain Sentiment Classification.	db/conf/acl/acl2011.html#BollegalaWC11
2078833	ss	2010	Non-Cooperation in Dialogue.	db/conf/acl/acl2010r.html#Pluss10
2078839	Matthieu_Constant,Anthony_Sigogne,Patrick_Watrin	2012	Discriminative Strategies to Integrate Multiword Expression Recognition and Parsing.	db/conf/acl/acl2012-1.html#ConstantSW12
2078845	Roberto_Navigli,Simone_Paolo_Ponzetto	2010	BabelNet: Building a Very Large Multilingual Semantic Network.	db/conf/acl/acl2010.html#NavigliP10
2078851	Micha_Elsner,Eugene_Charniak	2011	Extending the Entity Grid with Entity-Specific Features.	db/conf/acl/acl2011s.html#ElsnerC11a
2078856	Aaron_Michelony	2011	Predicting Clicks in a Vocabulary Learning System.	db/conf/acl/acl2011r.html#Michelony11
2078861	Nathanael_Chambers,Daniel_Jurafsky	2010	Improving the Use of Pseudo-Words for Evaluating Selectional Preferences.	db/conf/acl/acl2010.html#ChambersJ10
2078862	Balaji_Soundrarajan,Thomas_Ginter,Scott_L._DuVall	2011	An Interface for Rapid Natural Language Processing Development in UIMA.	db/conf/acl/acl2011d.html#SoundrarajanGD11
2078867	Dani_Yogatama,Yanchuan_Sim,Noah_A._Smith	2012	A Probabilistic Model for Canonicalizing Named Entity Mentions.	db/conf/acl/acl2012-1.html#YogatamaSS12
2078869	Xin_Zhao,Rishan_Chen,Kai_Fan,Hongfei_Yan,Xiaoming_Li	2012	A Novel Burst-based Text Representation Model for Scalable Event Detection.	db/conf/acl/acl2012-2.html#ZhaoCFYL12
2078871	rschinger,Mark_Johnson	2012	Using Rejuvenation to Improve Particle Filtering for Bayesian Word Segmentation.	db/conf/acl/acl2012-2.html#BorschingerJ12
2078872	David_Chiang	2010	Learning to Translate with Source and Target Syntax.	db/conf/acl/acl2010.html#Chiang10
2078879	Pei_Yang,Wei_Gao,Qi_Tan,Kam-Fai_Wong	2012	Information-theoretic Multi-view Domain Adaptation.	db/conf/acl/acl2012-2.html#YangGTW12
2078905	Rasoul_Samad_Zadeh_Kaljahi	2010	Adapting Self-Training for Semantic Role Labeling.	db/conf/acl/acl2010r.html#Kaljahi10
2078913	Kuzman_Ganchev,Keith_B._Hall,Ryan_T._McDonald,Slav_Petrov	2012	Using Search-Logs to Improve Query Tagging.	db/conf/acl/acl2012-2.html#GanchevHMP12
2078914	Shasha_Li,Chin-Yew_Lin,Young-In_Song,Zhoujun_Li	2010	Comparable Entity Mining from Comparative Questions.	db/conf/acl/acl2010.html#LiLSL10
2078916	Kevin_Duh,Katsuhito_Sudoh,Xianchao_Wu,Hajime_Tsukada,Masaaki_Nagata	2012	Learning to Translate with Multiple Objectives.	db/conf/acl/acl2012-1.html#DuhSWTN12
2078917	David_Jurgens,Keith_Stevens	2010	The S-Space Package: An Open Source Package for Word Space Models.	db/conf/acl/acl2010d.html#JurgensS10
2078925	Sindhu_Raghavan,Adriana_Kovashka,Raymond_J._Mooney	2010	Authorship Attribution Using Probabilistic Context-Free Grammars.	db/conf/acl/acl2010s.html#RaghavanKM10
2078933	Zhenghua_Li,Ting_Liu,Wanxiang_Che	2012	Exploiting Multiple Treebanks for Parsing with Quasi-synchronous Grammars.	db/conf/acl/acl2012-1.html#LiLC12
2078934	Aditya_Bhargava,Grzegorz_Kondrak	2011	How do you pronounce your name? Improving G2P with transliterations.	db/conf/acl/acl2011.html#BhargavaK11
2078948	Sida_I._Wang,Christopher_D._Manning	2012	Baselines and Bigrams: Simple, Good Sentiment and Topic Classification.	db/conf/acl/acl2012-2.html#WangM12
2078955	Clifton_James_McFate	2010	Expanding Verb Coverage in Cyc with VerbNet.	db/conf/acl/acl2010r.html#McFate10
2078961	Hugo_Jair_Escalante,Thamar_Solorio,mez	2011	Local Histograms of Character N-grams for Authorship Attribution.	db/conf/acl/acl2011.html#EscalanteSM11
2078963	Dipanjan_Das_0001,Slav_Petrov	2011	Unsupervised Part-of-Speech Tagging with Bilingual Graph-Based Projections.	db/conf/acl/acl2011.html#DasP11
2078977	Taniya_Mishra,Srinivas_Bangalore	2011	Predicting Relative Prominence in Noun-Noun Compounds.	db/conf/acl/acl2011s.html#MishraB11
2078978	Anna_Margolis,Mari_Ostendorf	2011	Question Detection in Spoken Conversations Using Textual Conversations.	db/conf/acl/acl2011s.html#MargolisO11
2078980	Marine_Carpuat,Yuval_Marton,Nizar_Habash	2010	Improving Arabic-to-English Statistical Machine Translation by Reordering Post-Verbal Subjects for Alignment.	db/conf/acl/acl2010s.html#CarpuatMH10
2078981	gaard	2011	Data point selection for cross-language adaptation of dependency parsers.	db/conf/acl/acl2011s.html#Sogaard11a
2078982	Ming_Tan,Wenli_Zhou,Lei_Zheng,Shaojun_Wang	2011	A Large Scale Distributed Syntactic, Semantic and Lexical Language Model for Machine Translation.	db/conf/acl/acl2011.html#TanZZW11
2078984	Boxing_Chen,George_F._Foster,Roland_Kuhn	2010	Bilingual Sense Similarity for Statistical Machine Translation.	db/conf/acl/acl2010.html#ChenFK10
2079001	Emmanuel_Prochasson,Pascale_Fung	2011	Rare Word Translation Extraction from Aligned Comparable Documents.	db/conf/acl/acl2011.html#ProchassonF11
2079003	Benjamin_Swanson,Eugene_Charniak	2012	Native Language Detection with Tree Substitution Grammars.	db/conf/acl/acl2012-2.html#SwansonC12
2079014	Hui_Lin,Jeff_A._Bilmes	2011	A Class of Submodular Functions for Document Summarization.	db/conf/acl/acl2011.html#LinB11
2079019	Or_Biran,Samuel_Brody,Noemie_Elhadad	2011	Putting it Simply: a Context-Aware Approach to Lexical Simplification.	db/conf/acl/acl2011s.html#BiranBE11
2079031	Mohit_Bansal,Dan_Klein	2010	Simple, Accurate Parsing with an All-Fragments Grammar.	db/conf/acl/acl2010.html#BansalK10
2079036	Zornitsa_Kozareva,Eduard_H._Hovy	2011	Insights from Network Structure for Text Mining.	db/conf/acl/acl2011.html#KozarevaH11
2079038	Ann_Clifton,Anoop_Sarkar	2011	Combining Morpheme-based Machine Translation with Post-processing Morpheme Prediction.	db/conf/acl/acl2011.html#CliftonS11
2079044	Meni_Adler,Jonathan_Berant,Ido_Dagan	2012	Entailment-based Text Exploration with Application to the Health-care Domain.	db/conf/acl/acl2012d.html#AdlerBD12
2079045	Stephen_Tratz,Eduard_H._Hovy	2010	A Taxonomy, Dataset, and Classifier for Automatic Noun Compound Interpretation.	db/conf/acl/acl2010.html#TratzH10
2079046	Jian-Cheng_Wu,Yu-Chia_Chang,Teruko_Mitamura,Jason_S._Chang	2010	Automatic Collocation Suggestion in Academic Writing.	db/conf/acl/acl2010s.html#WuCMC10
2079064	Ioannis_Konstas,Mirella_Lapata	2012	Concept-to-text Generation via Discriminative Reranking.	db/conf/acl/acl2012-1.html#KonstasL12
2079068	Youngjun_Kim,Ellen_Riloff,phane_M._Meystre	2011	Improving Classification of Medical Assertions in Clinical Notes.	db/conf/acl/acl2011s.html#KimRM11
2079080	Maoxi_Li,Chengqing_Zong,Hwee_Tou_Ng	2011	Automatic Evaluation of Chinese Translation Output: Word-Level or Character-Level?	db/conf/acl/acl2011s.html#LiZN11
2079081	Kristian_Woodsend,Mirella_Lapata	2010	Automatic Generation of Story Highlights.	db/conf/acl/acl2010.html#WoodsendL10
2079084	Jeffrey_Heinz,Colin_de_la_Higuera,Menno_van_Zaanen	2011	Formal and Empirical Grammatical Inference.	db/conf/acl/acl2011t.html#HeinzHZ11
2079087	Nitin_Agarwal,Ravi_Shankar_Reddy,Kiran_G._V._R.,Ã©	2011	SciSumm: A Multi-Document Summarization System for Scientific Articles.	db/conf/acl/acl2011d.html#AgarwalRRR11
2079090	Zhuowei_Bao,Benny_Kimelfeld,Yunyao_Li	2011	A Graph Approach to Spelling Correction in Domain-Centric Search.	db/conf/acl/acl2011.html#BaoKL11
2079094	Tong_Xiao,Jingbo_Zhu,Muhua_Zhu,Huizhen_Wang	2010	Boosting-Based System Combination for Machine Translation.	db/conf/acl/acl2010.html#XiaoZZW10
2079095	Delip_Rao,David_Yarowsky	2011	Typed Graph Models for Learning Latent Attributes from Names.	db/conf/acl/acl2011s.html#RaoY11
2079097	Jennifer_Gillenwater,Kuzman_Ganchev,a,Fernando_Pereira,Ben_Taskar	2010	Sparsity in Dependency Grammar Induction.	db/conf/acl/acl2010s.html#GillenwaterGGPT10
2079102	Eduardo_Blanco_0002,Dan_I._Moldovan	2011	Unsupervised Learning of Semantic Relation Composition.	db/conf/acl/acl2011.html#BlancoM11a
2079109	Luciana_Benotti,Martin_Villalba,Tessa_A._Lau,Julian_A._Cerruti	2012	Corpus-based Interpretation of Instructions in Virtual Environments.	db/conf/acl/acl2012-2.html#BenottiVLC12
2079111	Michael_Mohler,Razvan_C._Bunescu,Rada_Mihalcea	2011	Learning to Grade Short Answer Questions using Semantic Similarity Measures and Dependency Graph Alignments.	db/conf/acl/acl2011.html#MohlerBM11
2079115	Enrique_Alfonseca,Katja_Filippova,Jean-Yves_Delort,Guillermo_Garrido	2012	Pattern Learning for Relation Extraction with a Hierarchical Topic Model.	db/conf/acl/acl2012-2.html#AlfonsecaFDG12
2079124	Ahmed_Hassan_Awadallah,Dragomir_R._Radev	2010	Identifying Text Polarity Using Random Walks.	db/conf/acl/acl2010.html#HassanR10
2079128	Jacob_Eisenstein,Noah_A._Smith,Eric_P._Xing	2011	Discovering Sociolinguistic Associations with Structured Sparsity.	db/conf/acl/acl2011.html#EisensteinSX11
2079129	Alla_Rozovskaya,Dan_Roth	2011	Algorithm Selection and Model Adaptation for ESL Correction Tasks.	db/conf/acl/acl2011.html#RozovskayaR11
2079130	Marta_Recasens,Eduard_H._Hovy	2010	Coreference Resolution across Corpora: Languages, Coding Schemes, and Preprocessing Information.	db/conf/acl/acl2010.html#RecasensH10
2079134	Nicola_Cancedda	2012	Private Access to Phrase Tables for Statistical Machine Translation.	db/conf/acl/acl2012-2.html#Cancedda12
2079136	Sharon_Gower_Small,Jennifer_Stromer-Galley,Tomek_Strzalkowski	2011	Multi-Modal Annotation of Quest Games in Second Life.	db/conf/acl/acl2011.html#SmallSS11
2079138	Asher_Stern_0001,Roni_Stern,Ido_Dagan,Ariel_Felner	2012	Efficient Search for Transformation-based Inference.	db/conf/acl/acl2012-1.html#SternSDF12
2079140	Lane_Schwartz,Chris_Callison-Burch,William_Schuler,Stephen_T._Wu	2011	Incremental Syntactic Language Models for Phrase-based Translation.	db/conf/acl/acl2011.html#SchwartzCSW11
2079143	Micha_Elsner,Eugene_Charniak	2011	Disentangling Chat with Local Coherence Models.	db/conf/acl/acl2011.html#ElsnerC11
2079146	Sara_Rosenthal,Kathleen_McKeown	2011	Age Prediction in Blogs: A Study of Style, Content, and Online Behavior in Pre- and Post-Social Media Generations.	db/conf/acl/acl2011.html#RosenthalM11
2079151	Matthew_R._Scott,Xiaohua_Liu,Ming_Zhou	2011	Engkoo: Mining the Web for Language Learning.	db/conf/acl/acl2011d.html#ScottLZ11
2079153	Marco_Lui,Timothy_Baldwin	2012	langid.py: An Off-the-shelf Language Identification Tool.	db/conf/acl/acl2012d.html#LuiB12
2079155	Xiaojun_Wan,Huiying_Li,Jianguo_Xiao	2010	Cross-Language Document Summarization Based on Machine Translation Quality Prediction.	db/conf/acl/acl2010.html#WanLX10
2079157	Anja_Belz,Eric_Kow	2011	Discrete vs. Continuous Rating Scales for Language Evaluation in NLP.	db/conf/acl/acl2011s.html#BelzK11
2079160	Kornel_Laskowski	2010	Modeling Norms of Turn-Taking in Multi-Party Conversation.	db/conf/acl/acl2010.html#Laskowski10
2079161	Terry_Koo,Michael_Collins	2010	Efficient Third-Order Dependency Parsers.	db/conf/acl/acl2010.html#KooC10
2079166	Frank_Keller	2010	Cognitively Plausible Models of Human Language Processing.	db/conf/acl/acl2010s.html#Keller10
2079170	Chikara_Hashimoto,Kentaro_Torisawa,Stijn_De_Saeger,Jun'ichi_Kazama,Sadao_Kurohashi	2011	Extracting Paraphrases from Definition Sentences on the Web.	db/conf/acl/acl2011.html#HashimotoTSKK11
2079175	Deyi_Xiong,Min_Zhang_0005,Haizhou_Li	2010	Error Detection for Statistical Machine Translation Using Linguistic Features.	db/conf/acl/acl2010.html#XiongZL10
2079183	Limin_Yao,Sebastian_Riedel,Andrew_McCallum	2012	Unsupervised Relation Discovery with Sense Disambiguation.	db/conf/acl/acl2012-1.html#YaoRM12
2079191	Polina_Kuznetsova,Vicente_Ordonez,Alexander_C._Berg,Tamara_L._Berg,Yejin_Choi	2012	Collective Generation of Natural Image Descriptions.	db/conf/acl/acl2012-1.html#KuznetsovaOBBC12
2079198	Jinxi_Xu,Jinying_Chen	2011	How Much Can We Gain from Supervised Word Alignment?	db/conf/acl/acl2011s.html#XuC11
2079203	Ziheng_Lin,Chang_Liu,Hwee_Tou_Ng,Min-Yen_Kan	2012	Combining Coherence Models and Machine Translation Evaluation Metrics for Summarization Evaluation.	db/conf/acl/acl2012-1.html#LinLNK12
2079204	Siwei_Wang,Gina-Anne_Levow	2011	Contrasting Multi-Lingual Prosodic Cues to Predict Verbal Feedback for Rapport.	db/conf/acl/acl2011s.html#WangL11a
2079206	Milen_Kouylekov,Matteo_Negri	2010	An Open-Source Package for Recognizing Textual Entailment.	db/conf/acl/acl2010d.html#KouylekovN10
2079223	Matthias_H._Heie,Edward_W._D._Whittaker,Sadaoki_Furui	2010	Optimizing Question Answering Accuracy by Maximizing Log-Likelihood.	db/conf/acl/acl2010s.html#HeieWF10
2079224	Yunyao_Li,Laura_Chiticariu,Huahai_Yang,Frederick_Reiss,Arnaldo_Carreno-Fuentes	2012	WizIE: A Best Practices Guided Development Environment for Information Extraction.	db/conf/acl/acl2012d.html#LiCYRC12
2079227	Sujith_Ravi,Kevin_Knight	2011	Deciphering Foreign Language.	db/conf/acl/acl2011.html#RaviK11
2079245	Xu_Sun,Houfeng_Wang,Wenjie_Li	2012	Fast Online Training with Frequency-Adaptive Learning Rates for Chinese Word Segmentation and New Word Detection.	db/conf/acl/acl2012-1.html#SunWL12
2079269	Xinfan_Meng,Furu_Wei,Xiaohua_Liu,Ming_Zhou,Ge_Xu,Houfeng_Wang	2012	Cross-Lingual Mixture Model for Sentiment Classification.	db/conf/acl/acl2012-1.html#MengWLZXW12
2079272	Benjamin_Snyder,Regina_Barzilay,Kevin_Knight	2010	A Statistical Model for Lost Language Decipherment.	db/conf/acl/acl2010.html#SnyderBK10
2079281	Ce_Zhang,Feng_Niu,Ã©,Jude_W._Shavlik	2012	Big Data versus the Crowd: Looking for Relationships in All the Right Places.	db/conf/acl/acl2012-1.html#ZhangNRS12
2079285	Hao_Zhang,Licheng_Fang,Peng_Xu,Xiaoyun_Wu	2011	Binarized Forest to String Translation.	db/conf/acl/acl2011.html#ZhangFXW11
2079286	Jagadeesh_Jagarlamudi,III,Raghavendra_Udupa	2011	From Bilingual Dictionaries to Interlingual Document Representations.	db/conf/acl/acl2011s.html#JagarlamudiDU11
2079291	as,lvaro_Rodrigo	2011	A Simple Measure to Assess Non-response.	db/conf/acl/acl2011.html#PenasR11
2079309	Markos_Mylonakis,Khalil_Sima'an	2011	Learning Hierarchical Translation Structure with Linguistic Annotations.	db/conf/acl/acl2011.html#MylonakisS11
2079311	Pierre_Magistry,t_Sagot	2012	Unsupervized Word Segmentation: the Case for Mandarin Chinese.	db/conf/acl/acl2012-2.html#MagistryS12
2079312	Sindhu_Raghavan,Raymond_J._Mooney,Hyeonseo_Ku	2012	Learning to "Read Between the Lines" using Bayesian Logic Programs.	db/conf/acl/acl2012-1.html#RaghavanMK12
2079316	Jonathan_H._Clark,Chris_Dyer,Alon_Lavie,Noah_A._Smith	2011	Better Hypothesis Testing for Statistical Machine Translation: Controlling for Optimizer Instability.	db/conf/acl/acl2011s.html#ClarkDLS11
2079321	Dingcheng_Li,Timothy_A._Miller,William_Schuler	2011	A Pronoun Anaphora Resolution System based on Factorial Hidden Markov Models.	db/conf/acl/acl2011.html#LiMS11
2079322	Michael_Auli,Adam_Lopez	2011	A Comparison of Loopy Belief Propagation and Dual Decomposition for Integrated CCG Supertagging and Parsing.	db/conf/acl/acl2011.html#AuliL11
2079333	Jinsong_Su,Yang_Liu_0005,Ã¼,Haitao_Mi,Qun_Liu	2010	Learning Lexicalized Reordering Models from Reordering Graphs.	db/conf/acl/acl2010s.html#SuLLML10
2079336	Vahed_Qazvinian,Dragomir_R._Radev	2011	Learning From Collective Human Behavior to Introduce Diversity in Lexical Choice.	db/conf/acl/acl2011.html#QazvinianR11
2079338	Fumiyo_Fukumoto,Yoshimi_Suzuki	2011	Identification of Domain-Specific Senses in a Machine-Readable Dictionary.	db/conf/acl/acl2011s.html#FukumotoS11
2079339	Thomas_Lavergne,Ã©,ois_Yvon	2010	Practical Very Large Scale CRFs.	db/conf/acl/acl2010.html#LavergneCY10
2079354	Tahira_Naseem,Regina_Barzilay,Amir_Globerson	2012	Selective Sharing for Multilingual Dependency Parsing.	db/conf/acl/acl2012-1.html#NaseemBG12
2079363	Josef_Steinberger,Marco_Turchi,Mijail_A._Kabadjov,Ralf_Steinberger,Nello_Cristianini	2010	Wrapping up a Summary: From Representation to Generation.	db/conf/acl/acl2010s.html#SteinbergerTKSC10
2079365	Nianwen_Xue,Yaqin_Yang	2011	Chinese sentence segmentation as comma classification.	db/conf/acl/acl2011s.html#XueY11
2079366	Amitava_Das	2011	PsychoSentiWordNet.	db/conf/acl/acl2011r.html#Das11
2079368	Matt_Post	2011	Judging Grammaticality with Tree Substitution Grammar Derivations.	db/conf/acl/acl2011s.html#Post11
2079379	Ekaterina_Shutova	2010	Models of Metaphor in NLP.	db/conf/acl/acl2010.html#Shutova10
2079392	Pradeep_Dasigi,Weiwei_Guo,Mona_T._Diab	2012	Genre Independent Subgroup Detection in Online Discussion Threads: A Study of Implicit Attitude using Textual Latent Semantics.	db/conf/acl/acl2012-2.html#DasigiGD12
2079394	Christian_Rohrdantz,Annette_Hautli,Thomas_Mayer,Miriam_Butt,Daniel_A._Keim,Frans_Plank	2011	Towards Tracking Semantic Change by Visual Analytics.	db/conf/acl/acl2011s.html#RohrdantzHMBKP11
2079401	Annette_Hautli,Sebastian_Sulger	2011	Extracting and Classifying Urdu Multiword Expressions.	db/conf/acl/acl2011r.html#HautliS11
2079403	Danilo_Croce,Alessandro_Moschitti,Roberto_Basili,Martha_Palmer	2012	Verb Classification using Distributional Similarity in Syntactic and Semantic Structures.	db/conf/acl/acl2012-1.html#CroceMBP12
2079406	Zhonghua_Qu,Yang_Liu_0004	2011	Interactive Group Suggesting for Twitter.	db/conf/acl/acl2011s.html#QuL11
2079410	Hiroyuki_Shindo,Yusuke_Miyao,Akinori_Fujino,Masaaki_Nagata	2012	Bayesian Symbol-Refined Tree Substitution Grammars for Syntactic Parsing.	db/conf/acl/acl2012-1.html#ShindoMFN12
2079413	Heng_Ji,Ralph_Grishman	2011	Knowledge Base Population: Successful Approaches and Challenges.	db/conf/acl/acl2011.html#JiG11
2079416	Min_Zhang_0005,Hui_Zhang,Haizhou_Li	2010	Convolution Kernel over Packed Parse Forest.	db/conf/acl/acl2010.html#ZhangZL10
2079417	Wei_He,Hua_Wu,Haifeng_Wang,Ting_Liu	2012	Improve SMT Quality with Automatically Extracted Paraphrase Rules.	db/conf/acl/acl2012-1.html#HeWWL12
2079444	elikyilmaz,r	2010	A Hybrid Hierarchical Model for Multi-Document Summarization.	db/conf/acl/acl2010.html#CelikyilmazH10
2079446	Benjamin_Van_Durme,Ashwin_Lall	2010	Online Generation of Locality Sensitive Hash Signatures.	db/conf/acl/acl2010s.html#DurmeL10
2079447	Elif_Yamangil,Stuart_M._Shieber	2012	Estimating Compact Yet Rich Tree Insertion Grammars.	db/conf/acl/acl2012-2.html#YamangilS12
2079448	Emad_Mohamed,Behrang_Mohit,Kemal_Oflazer	2012	Transforming Standard Arabic to Colloquial Arabic.	db/conf/acl/acl2012-2.html#MohamedMO12
2079449	Brian_Roark,Richard_Sproat,Izhak_Shafran	2011	Lexicographic Semirings for Exact Automata Encoding of Sequence Models.	db/conf/acl/acl2011s.html#RoarkSS11
2079456	Tony_Veale,Yanfen_Hao	2011	Exploiting Readymades in Linguistic Creativity: A System Demonstration of the Jigsaw Bard.	db/conf/acl/acl2011d.html#VealeH11
2079459	Georgios_Paltoglou,Mike_Thelwall	2010	A Study of Information Retrieval Weighting Schemes for Sentiment Analysis.	db/conf/acl/acl2010.html#PaltoglouT10
2079463	Xiaoli_Li_0001,Lei_Zhang_0016,Bing_Liu_0001,See-Kiong_Ng	2010	Distributional Similarity vs. PU Learning for Entity Set Expansion.	db/conf/acl/acl2010s.html#LiZLN10
2079464	Omri_Abend,Ari_Rappoport	2010	Fully Unsupervised Core-Adjunct Argument Classification.	db/conf/acl/acl2010.html#AbendR10
2079476	Yves_Petinot,Kathleen_McKeown,Kapil_Thadani	2011	A Hierarchical Model of Web Summaries.	db/conf/acl/acl2011s.html#PetinotMT11
2079492	Yabin_Zheng,Lixing_Xie,Zhiyuan_Liu,Maosong_Sun,Yang_Zhang,Liyun_Ru	2011	Why Press Backspace? Understanding User Input Behaviors in Chinese Pinyin Input Method.	db/conf/acl/acl2011s.html#ZhengXLSZR11
2079499	Lun-Wei_Ku,Cheng-Wei_Sun,Ya-Hsin_Hsueh	2012	Demonstration of IlluMe: Creating Ambient According to Instant Message Logs.	db/conf/acl/acl2012d.html#KuSH12
2079505	Nobuhiro_Kaji,Yasuhiro_Fujiwara,Naoki_Yoshinaga_0001,Masaru_Kitsuregawa	2010	Efficient Staggered Decoding for Sequence Labeling.	db/conf/acl/acl2010.html#KajiFYK10
2079511	Jonathan_Berant,Ido_Dagan,Jacob_Goldberger	2011	Global Learning of Typed Entailment Rules.	db/conf/acl/acl2011.html#BerantDG11
2079516	Nadir_Durrani,Hassan_Sajjad,Alexander_M._Fraser,Helmut_Schmid	2010	Hindi-to-Urdu Machine Translation through Transliteration.	db/conf/acl/acl2010.html#DurraniSFS10
2079522	Muhua_Zhu,Jingbo_Zhu,Minghan_Hu	2011	Better Automatic Treebank Conversion Using A Feature-Based Approach.	db/conf/acl/acl2011s.html#ZhuZH11
2079527	Manaal_Faruqui,Ã³	2011	"I Thou Thee, Thou Traitor": Predicting Formal vs. Informal Address in English Literature.	db/conf/acl/acl2011s.html#FaruquiP11
2079531	ez,Smaranda_Muresan,Nina_Wacholder	2011	Identifying Sarcasm in Twitter: A Closer Look.	db/conf/acl/acl2011s.html#Gonzalez-IbanezMW11
2079536	Spence_Green,John_DeNero	2012	A Class-Based Agreement Model for Generating Accurately Inflected Translations.	db/conf/acl/acl2012-1.html#GreenD12
2079545	Jun'ichi_Kazama,Stijn_De_Saeger,Kow_Kuroda,Masaki_Murata,Kentaro_Torisawa	2010	A Bayesian Method for Robust Estimation of Distributional Similarities.	db/conf/acl/acl2010.html#KazamaSKMT10
2079546	Cosmin_Adrian_Bejan,Sanda_M._Harabagiu	2010	Unsupervised Event Coreference Resolution with Rich Linguistic Features.	db/conf/acl/acl2010.html#BejanH10
2079556	Trung_H._Bui,Stanley_Peters	2010	Decision Detection Using Hierarchical Graphical Models.	db/conf/acl/acl2010s.html#BuiP10
2079562	Raphael_Hoffmann,Congle_Zhang,Daniel_S._Weld	2010	Learning 5000 Relational Extractors.	db/conf/acl/acl2010.html#HoffmannZW10
2079564	Fan_Bu,Hang_Li,Xiaoyan_Zhu	2012	String Re-writing Kernel.	db/conf/acl/acl2012-1.html#BuLZ12
2079568	Gerard_de_Melo,Gerhard_Weikum	2012	UWN: A Large Multilingual Lexical Knowledge Base.	db/conf/acl/acl2012d.html#MeloW12
2079575	Isao_Goto,Masao_Utiyama,Eiichiro_Sumita	2012	Post-ordering by Parsing for Japanese-English Statistical Machine Translation.	db/conf/acl/acl2012-2.html#GotoUS12
2079576	Manabu_Sassano,Sadao_Kurohashi	2010	Using Smaller Constituents Rather Than Sentences in Active Learning for Japanese Dependency Parsing.	db/conf/acl/acl2010.html#SassanoK10
2079587	Joseph_Z._Chang,Jason_S._Chang,Jyh-Shing_Roger_Jang	2012	Learning to Find Translations and Transliterations on the Web.	db/conf/acl/acl2012-2.html#ChangCJ12
2079593	Kugatsu_Sadamitsu,Kuniko_Saito,Kenji_Imamura,Gen-ichiro_Kikui	2011	Entity Set Expansion using Topic information.	db/conf/acl/acl2011s.html#SadamitsuSIK11
2079595	Alessandro_Moschitti,Qi_Ju,Richard_Johansson	2012	Modeling Topic Dependencies in Hierarchical Text Categorization.	db/conf/acl/acl2012-1.html#MoschittiJJ12
2079599	Chia-ying_Lee,James_R._Glass	2012	A Nonparametric Bayesian Approach to Acoustic Model Discovery.	db/conf/acl/acl2012-1.html#LeeG12
2079607	Ruihong_Huang,Ellen_Riloff	2011	Peeling Back the Layers: Detecting Event Role Fillers in Secondary Contexts.	db/conf/acl/acl2011.html#HuangR11
2079608	Wan-Yu_Lin,Nanyun_Peng,Chun-Chao_Yen,Shou-de_Lin	2012	Online Plagiarized Detection Through Exploiting Lexical, Syntax, and Semantic Information.	db/conf/acl/acl2012d.html#LinPYL12
2079609	Siva_Reddy,Abhilash_Inumella	2010	WSD as a Distributed Constraint Optimization Problem.	db/conf/acl/acl2010r.html#ReddyI10
2079610	Barbara_McGillivray	2010	Automatic Selectional Preference Acquisition for Latin Verbs.	db/conf/acl/acl2010r.html#McGillivray10
2079611	Donald_Metzler,Eduard_H._Hovy,Chunliang_Zhang	2011	An Empirical Evaluation of Data-Driven Paraphrase Generation Techniques.	db/conf/acl/acl2011s.html#MetzlerHZ11
2079614	Jonathan_May,Kevin_Knight,Heiko_Vogler	2010	Efficient Inference through Cascades of Weighted Tree Transducers.	db/conf/acl/acl2010.html#MayKV10
2079639	Ryan_Gabbard,Marjorie_Freedman,Ralph_M._Weischedel	2011	Coreference for Learning to Extract Relations: Yes Virginia, Coreference Matters.	db/conf/acl/acl2011s.html#GabbardFW11
2079647	Gerard_de_Melo,Gerhard_Weikum	2010	Untangling the Cross-Lingual Link Structure of Wikipedia.	db/conf/acl/acl2010.html#MeloW10
2079649	Joseph_Reisinger,Marius_Pasca	2011	Fine-Grained Class Label Markup of Search Queries.	db/conf/acl/acl2011.html#ReisingerP11
2079655	Reut_Tsarfaty,Joakim_Nivre,Evelina_Andersson	2012	Joint Evaluation of Morphological Segmentation and Syntactic Parsing.	db/conf/acl/acl2012-2.html#TsarfatyNA12
2079664	Katsuhiko_Hayashi,Taro_Watanabe,Masayuki_Asahara,Yuji_Matsumoto	2012	Head-driven Transition-based Parsing with Top-down Prediction.	db/conf/acl/acl2012-1.html#HayashiWAM12
2079668	Song_Feng,Ritwik_Banerjee,Yejin_Choi	2012	Syntactic Stylometry for Deception Detection.	db/conf/acl/acl2012-2.html#FengBC12
2079680	Paula_Carvalho,s_Sarmento,Jorge_Teixeira,rio_J._Silva	2011	Liars and Saviors in a Sentiment Annotated Corpus of Comments to Political Debates.	db/conf/acl/acl2011s.html#CarvalhoSTS11
2079689	Sameer_Singh_0001,Amarnag_Subramanya,Fernando_C._N._Pereira,Andrew_McCallum	2011	Large-Scale Cross-Document Coreference Using Distributed Inference and Hierarchical Models.	db/conf/acl/acl2011.html#SinghSPM11
2079690	Neil_Duncan_McIntyre,Mirella_Lapata	2010	Plot Induction and Evolutionary Search for Story Generation.	db/conf/acl/acl2010.html#McIntyreL10
2079693	Ashish_Vaswani,Liang_Huang,David_Chiang	2012	Smaller Alignment Models for Better Translations: Unsupervised Word Alignment with the l0-norm.	db/conf/acl/acl2012-1.html#VaswaniHC12
2079694	Anthony_Fader,Stephen_Soderland,Oren_Etzioni	2010	Extracting Sequences from the Web.	db/conf/acl/acl2010s.html#FaderSE10
2079722	Stephen_T._Wu,Asaf_Bachrach,Carlos_Cardenas,William_Schuler	2010	Complexity Metrics in an Incremental Right-Corner Parser.	db/conf/acl/acl2010.html#WuBCS10
2079738	Eduardo_Blanco_0002,Dan_I._Moldovan	2011	Semantic Representation of Negation Using Focus Detection.	db/conf/acl/acl2011.html#BlancoM11
2079741	Geoffrey_Zweig,John_C._Platt,Christopher_Meek,Christopher_J._C._Burges,Ainur_Yessenalina,Qiang_Liu	2012	Computational Approaches to Sentence Completion.	db/conf/acl/acl2012-1.html#ZweigPMBYL12
2079749	David_McClosky,Mihai_Surdeanu,Christopher_D._Manning	2011	Event Extraction as Dependency Parsing.	db/conf/acl/acl2011.html#McCloskySM11
2079750	Swati_Tata,Barbara_Di_Eugenio	2010	Generating Fine-Grained Reviews of Songs from Album Reviews.	db/conf/acl/acl2010.html#TataE10
2079763	N,U,L,L	2012	Front Matter.	db/conf/acl/acl2012t.html#X12
2079766	Kristy_Elizabeth_Boyer,Joseph_F._Grafsgaard,Eunyoung_Ha,Robert_Phillips,James_C._Lester	2011	An Affect-Enriched Dialogue Act Classification Model for Task-Oriented Dialogue.	db/conf/acl/acl2011.html#BoyerGHPL11
2079772	Amjad_Abu-Jbara,Barbara_Rosario,Kent_Lyons	2011	Towards Style Transformation from Written-Style to Audio-Style.	db/conf/acl/acl2011s.html#Abu-JbaraRL11
2079799	Marie-Catherine_de_Marneffe,Christopher_D._Manning,Christopher_Potts	2010	"Was It Good? It Was Provocative." Learning the Meaning of Scalar Adjectives.	db/conf/acl/acl2010.html#MarneffeMP10
2079808	Srinivasan_Janarthanam,Oliver_Lemon,Xingkun_Liu	2012	A Web-based Evaluation Framework for Spatial Instruction-Giving Systems.	db/conf/acl/acl2012d.html#JanarthanamLL12
2079825	Xiaobing_Xue,Yu_Tao,Daxin_Jiang,Hang_Li	2012	Automatically Mining Question Reformulation Patterns from Search Log Data.	db/conf/acl/acl2012-2.html#XueTJL12
2079837	Richard_Eckart_de_Castilho,Sabine_Bartsch,Iryna_Gurevych	2012	CSNIPER - Annotation-by-query for Non-canonical Constructions in Large Corpora.	db/conf/acl/acl2012d.html#CastilhoBG12
2079844	Vladimir_Eidelman,Jordan_L._Boyd-Graber,Philip_Resnik	2012	Topic Models for Dynamic Translation Model Adaptation.	db/conf/acl/acl2012-2.html#EidelmanBR12
2079853	Rada_Mihalcea,Vivi_Nastase	2012	Word Epoch Disambiguation: Finding How Words Change Over Time.	db/conf/acl/acl2012-2.html#MihalceaN12
2079855	Ines_Rehbein,Josef_Ruppenhofer	2011	Evaluating the Impact of Coder Errors on Active Learning.	db/conf/acl/acl2011.html#RehbeinR11
2079856	Ahmet_Aker,Robert_J._Gaizauskas	2010	Generating Image Descriptions Using Dependency Relational Patterns.	db/conf/acl/acl2010.html#AkerG10
2079864	Christian_Chiarcos	2012	Towards the Unsupervised Acquisition of Discourse Relations.	db/conf/acl/acl2012-2.html#Chiarcos12
2079865	Ai_Ti_Aw,Lianhau_Lee	2012	Personalized Normalization for a Multilingual Chat System.	db/conf/acl/acl2012d.html#AwL12
2079872	Pierre-Etienne_Genest,Guy_Lapalme	2012	Fully Abstractive Approach to Guided Summarization.	db/conf/acl/acl2012-2.html#GenestL12
2079878	Jinsong_Su,Hua_Wu,Haifeng_Wang,Yidong_Chen,Xiaodong_Shi,Huailin_Dong,Qun_Liu	2012	Translation Model Adaptation for Statistical Machine Translation with Monolingual Topic Information.	db/conf/acl/acl2012-1.html#SuWWCSDL12
2079880	Timo_Baumann,David_Schlangen	2012	INPRO_iSS: A Component for Just-In-Time Incremental Speech Synthesis.	db/conf/acl/acl2012d.html#BaumannS12
2079904	Xipeng_Qiu,Xuanjing_Huang,Zhao_Liu,Jinlong_Zhou	2011	Hierarchical Text Classification with Latent Concepts.	db/conf/acl/acl2011s.html#QiuHLZ11
2079907	Hajime_Senuma	2011	K-means Clustering with Feature Hashing.	db/conf/acl/acl2011r.html#Senuma11
2079912	Taylor_Berg-Kirkpatrick,Dan_Klein	2010	Phylogenetic Grammar Induction.	db/conf/acl/acl2010.html#Berg-KirkpatrickK10
2079927	d,Massimiliano_Ciaramita,ller,tze	2011	Piggyback: Using Search Engines for Robust Cross-Domain Named Entity Recognition.	db/conf/acl/acl2011.html#RudCMS11
2079929	Asher_Stern_0001,Ido_Dagan	2012	BIUTEE: A Modular Open-Source System for Recognizing Textual Entailment.	db/conf/acl/acl2012d.html#SternD12
2079930	Makoto_Kanazawa,Sylvain_Salvati	2012	MIX Is Not a Tree-Adjoining Language.	db/conf/acl/acl2012-1.html#KanazawaS12
2079934	Zhiyang_Wang,Yajuan_Lv,Qun_Liu,Young-Sook_Hwang	2010	Better Filtration and Augmentation for Hierarchical Phrase-Based Translation Rules.	db/conf/acl/acl2010s.html#WangLLH10
2079938	William_M._Darling,Fei_Song	2011	Probabilistic Document Modeling for Syntax Removal in Text Summarization.	db/conf/acl/acl2011s.html#DarlingS11
2079940	Ryu_Iida,Massimo_Poesio	2011	A Cross-Lingual ILP Solution to Zero Anaphora Resolution.	db/conf/acl/acl2011.html#IidaP11
2079954	Mark_Johnson,Katherine_Demuth,Michael_C._Frank	2012	Exploiting Social Information in Grounded Language Learning via Grammatical Reduction.	db/conf/acl/acl2012-1.html#JohnsonDF12
2079962	Xiaoqiang_Luo,Bing_Zhao	2011	A Statistical Tree Annotator and Its Applications.	db/conf/acl/acl2011.html#LuoZ11
2079964	Alexandra_Birch,Miles_Osborne	2011	Reordering Metrics for MT.	db/conf/acl/acl2011.html#BirchO11
2079980	Michael_Bloodgood,Chris_Callison-Burch	2010	Bucking the Trend: Large-Scale Cost-Focused Active Learning for Statistical Machine Translation.	db/conf/acl/acl2010.html#BloodgoodC10
2079986	Omar_Zaidan,Chris_Callison-Burch	2011	Crowdsourcing Translation: Professional Quality from Non-Professionals.	db/conf/acl/acl2011.html#ZaidanC11
2080001	Karin_Murthy,Tanveer_A._Faruquie,L._Venkata_Subramaniam,Hima_Prasad_K,Mukesh_K._Mohania	2010	Automatically Generating Term Frequency Induced Taxonomies.	db/conf/acl/acl2010s.html#MurthyFSKM10
2080009	Beata_Beigman_Klebanov,Eyal_Beigman	2010	A Game-Theoretic Model of Metaphorical Bargaining.	db/conf/acl/acl2010.html#KlebanovB10
2080011	Chi-kiu_Lo,Dekai_Wu	2011	MEANT: An inexpensive, high-accuracy, semi-automatic metric for evaluating translation utility based on semantic roles.	db/conf/acl/acl2011.html#LoW11
2080016	Pierluigi_Crescenzi,Daniel_Gildea,Andrea_Marino,Gianluca_Rossi,Giorgio_Satta	2011	Optimal Head-Driven Parsing Complexity for Linear Context-Free Rewriting Systems.	db/conf/acl/acl2011.html#CrescenziGMRS11
2080017	Joern_Wuebker,Arne_Mauser,Hermann_Ney	2010	Training Phrase Translation Models with Leaving-One-Out.	db/conf/acl/acl2010.html#WuebkerMN10
2080027	N,U,L,L	2010	Front Matter.	db/conf/acl/acl2010s.html#X10a
2080032	Jui-Yu_Weng,Cheng-Lun_Yang,Bo-Nian_Chen,Yen-Kai_Wang,Shou-De_Lin	2011	IMASS: An Intelligent Microblog Analysis and Summarization System.	db/conf/acl/acl2011d.html#WengYCWL11
2080033	Manoj_Harpalani,Michael_Hart,Sandesh_Signh,Rob_Johnson,Yejin_Choi	2011	Language of Vandalism: Improving Wikipedia Vandalism Detection via Stylometric Analysis.	db/conf/acl/acl2011s.html#HarpalaniHSJC11
2080034	Zhan-yi_Liu,Haifeng_Wang,Hua_Wu,Ting_Liu,Sheng_Li	2011	Reordering with Source Language Collocations.	db/conf/acl/acl2011.html#LiuWWLL11
2080044	Fei_Wu_0003,Daniel_S._Weld	2010	Open Information Extraction Using Wikipedia.	db/conf/acl/acl2010.html#WuW10
2080054	Xiaohua_Liu,Ming_Zhou,Xiangyang_Zhou,Zhongyang_Fu,Furu_Wei	2012	Joint Inference of Named Entity Recognition and Normalization for Tweets.	db/conf/acl/acl2012-1.html#LiuZZFW12
2080056	s,Mark_A._Finlayson	2010	The Prevalence of Descriptive Referring Expressions in News and Narrative.	db/conf/acl/acl2010s.html#HervasF10
2080059	Naushad_UzZaman,James_F._Allen	2011	Temporal Evaluation.	db/conf/acl/acl2011s.html#UzZamanA11
2080062	Yassine_Benajiba,Imed_Zitouni,Mona_T._Diab,Paolo_Rosso	2010	Arabic Named Entity Recognition: Using Features Extracted from Noisy Data.	db/conf/acl/acl2010s.html#BenajibaZDR10
2080068	Sravana_Reddy,Kevin_Knight	2012	Decoding Running Key Ciphers.	db/conf/acl/acl2012-2.html#ReddyK12
2080071	Lea_Frermann,Francis_Bond	2012	Cross-lingual Parse Disambiguation based on Semantic Correspondence.	db/conf/acl/acl2012-2.html#FrermannB12
2080093	S._R._K._Branavan,Nate_Kushman,Tao_Lei,Regina_Barzilay	2012	Learning High-Level Planning from Text.	db/conf/acl/acl2012-1.html#BranavanKLB12
2080103	Myle_Ott,Yejin_Choi,Claire_Cardie,Jeffrey_T._Hancock	2011	Finding Deceptive Opinion Spam by Any Stretch of the Imagination.	db/conf/acl/acl2011.html#OttCCH11
2080107	Sujith_Ravi,Kevin_Knight	2011	Bayesian Inference for Zodiac and Other Homophonic Ciphers.	db/conf/acl/acl2011.html#RaviK11a
2080113	Dmitriy_Dligach,Martha_Palmer	2011	Good Seed Makes a Good Crop: Accelerating Active Learning Using Language Modeling.	db/conf/acl/acl2011s.html#DligachP11
2080114	Graham_Neubig,Yosuke_Nakata,Shinsuke_Mori	2011	Pointwise Prediction for Robust, Adaptable Japanese Morphological Analysis.	db/conf/acl/acl2011s.html#NeubigNM11
2080117	Deyi_Xiong,Min_Zhang_0005,Haizhou_Li	2011	Enhancing Language Models in Statistical Machine Translation with Backward N-grams and Mutual Information Triggers.	db/conf/acl/acl2011.html#XiongZL11
2080119	Zhili_Wu,Katja_Markert,Serge_Sharoff	2010	Fine-Grained Genre Classification Using Structural Learning Algorithms.	db/conf/acl/acl2010.html#WuMS10
2080122	Ani_Nenkova,Sameer_Maskey,Yang_Liu_0004	2011	Automatic Summarization.	db/conf/acl/acl2011t.html#NenkovaML11
2080148	Xianpei_Han,Le_Sun	2011	A Generative Entity-Mention Model for Linking Entities with Knowledge Base.	db/conf/acl/acl2011.html#HanS11
2080153	Dong_Wang,Xian_Qian,Yang_Liu_0004	2012	A Two-step Approach to Sentence Compression of Spoken Utterances.	db/conf/acl/acl2012-2.html#WangQL12
2080156	Ivan_Titov,Alexandre_Klementiev	2012	Crosslingual Induction of Semantic Roles.	db/conf/acl/acl2012-1.html#TitovK12
2080159	Emily_Pitler,Annie_Louis,Ani_Nenkova	2010	Automatic Evaluation of Linguistic Quality in Multi-Document Summarization.	db/conf/acl/acl2010.html#PitlerLN10
2080161	Xiaodong_He,Li_Deng	2012	Maximum Expected BLEU Training of Phrase and Lexicon Translation Models.	db/conf/acl/acl2012-1.html#HeD12
2080164	Thomas_Meyer_0003	2011	Disambiguating temporal-contrastive connectives for machine translation.	db/conf/acl/acl2011r.html#Meyer11
2080172	Matthew_Skala,Victoria_Krakovna,r,Gerald_Penn	2010	A Generalized-Zero-Preserving Method for Compact Encoding of Concept Lattices.	db/conf/acl/acl2010.html#SkalaKKP10
2080173	Tsung-Ting_Kuo,San-Chuan_Hung,Wei-Shih_Lin,Nanyun_Peng,Shou-De_Lin,Wei-Fen_Lin	2012	Exploiting Latent Information to Predict Diffusions of Novel Topics on Social Networks.	db/conf/acl/acl2012-2.html#KuoHLPLL12
2080181	Xiaojun_Wan	2011	Using Bilingual Information for Cross-Language Document Summarization.	db/conf/acl/acl2011.html#Wan11
2080190	Verena_Henrich,Erhard_W._Hinrichs	2010	GernEdiT - The GermaNet Editing Tool.	db/conf/acl/acl2010d.html#HenrichH10
2080202	Ashish_Vaswani,Adam_Pauls,David_Chiang	2010	Efficient Optimization of an MDL-Inspired Objective Function for Unsupervised Part-Of-Speech Tagging.	db/conf/acl/acl2010s.html#VaswaniPC10
2080218	Roy_Schwartz,Omri_Abend,Roi_Reichart,Ari_Rappoport	2011	Neutralizing Linguistically Problematic Annotations in Unsupervised Dependency Parsing Evaluation.	db/conf/acl/acl2011.html#SchwartzARR11
2080239	Mark_Sammons,V._G._Vinod_Vydiswaran,Dan_Roth	2010	"Ask Not What Textual Entailment Can Do for You...".	db/conf/acl/acl2010.html#SammonsVR10
2080247	Minwoo_Jeong,Ivan_Titov	2010	Unsupervised Discourse Segmentation of Documents with Inherently Parallel Structure.	db/conf/acl/acl2010s.html#JeongT10
2080261	Jeffrey_Heinz,James_Rogers	2010	Estimating Strictly Piecewise Distributions.	db/conf/acl/acl2010.html#HeinzR10
2080302	David_Chen,William_B._Dolan	2011	Collecting Highly Parallel Data for Paraphrase Evaluation.	db/conf/acl/acl2011.html#ChenD11
2080310	Alexis_Nasr,chet,ois_Rey,t_Favre,Joseph_Le_Roux	2011	MACAON An NLP Tool Suite for Processing Word Lattices.	db/conf/acl/acl2011d.html#NasrBRFR11
2080314	Phil_Blunsom,Trevor_Cohn	2011	A Hierarchical Pitman-Yor Process HMM for Unsupervised Part of Speech Induction.	db/conf/acl/acl2011.html#BlunsomC11
2080319	Weiwei_Guo,Mona_T._Diab	2010	Combining Orthogonal Monolingual and Multilingual Sources of Evidence for All Words WSD.	db/conf/acl/acl2010.html#GuoD10
2080321	Sander_Wubben,Antal_van_den_Bosch,Emiel_Krahmer	2012	Sentence Simplification by Monolingual Machine Translation.	db/conf/acl/acl2012-1.html#WubbenBK12
2080322	Ainur_Yessenalina,Yejin_Choi,Claire_Cardie	2010	Automatically Generating Annotator Rationales to Improve Sentiment Classification.	db/conf/acl/acl2010s.html#YessenalinaCC10
2080327	Haitao_Mi,Qun_Liu	2010	Constituency to Dependency Translation with Forests.	db/conf/acl/acl2010.html#MiL10
2080328	Yafang_Wang,Maximilian_Dylla,Marc_Spaniol,Gerhard_Weikum	2012	Coupling Label Propagation and Constraints for Temporal Fact Extraction.	db/conf/acl/acl2012-2.html#WangDSW12
2080336	Chang_Liu,Hwee_Tou_Ng	2012	Character-Level Machine Translation Evaluation for Languages with Ambiguous Word Boundaries.	db/conf/acl/acl2012-1.html#LiuN12
2080340	Jianxing_Yu,Zheng-Jun_Zha,Meng_Wang,Tat-Seng_Chua	2011	Aspect Ranking: Identifying Important Product Aspects from Online Consumer Reviews.	db/conf/acl/acl2011.html#YuZWC11
2080342	Richard_Power	2010	Complexity Assumptions in Ontology Verbalisation.	db/conf/acl/acl2010s.html#Power10
2080343	Toshikazu_Tajiri,Mamoru_Komachi,Yuji_Matsumoto	2012	Tense and Aspect Error Correction for ESL Learners Using Global Context.	db/conf/acl/acl2012-2.html#TajiriKM12
2080354	Gerlof_Bouma	2010	Collocation Extraction beyond the Independence Assumption.	db/conf/acl/acl2010s.html#Bouma10
2080361	Nathan_Green	2011	Effects of Noun Phrase Bracketing in Dependency Parsing and Machine Translation.	db/conf/acl/acl2011r.html#Green11
2080369	a,Julio_Gonzalo,Javier_Artiles	2010	Wikipedia as Sense Inventory to Improve Diversity in Web Search Results.	db/conf/acl/acl2010.html#SantamariaGA10
2080373	gaard	2011	Semi-supervised condensed nearest neighbor for part-of-speech tagging.	db/conf/acl/acl2011s.html#Sogaard11
2080377	Omri_Abend,Roi_Reichart,Ari_Rappoport	2010	Improved Unsupervised POS Induction through Prototype Discovery.	db/conf/acl/acl2010.html#AbendRR10
2080380	Karin_Mauge,Khash_Rohanimanesh,Jean-David_Ruvini	2012	Structuring E-Commerce Inventory.	db/conf/acl/acl2012-1.html#MaugeRR12
2080384	Matthew_Gerber,Joyce_Yue_Chai	2010	Beyond NomBank: A Study of Implicit Arguments for Nominal Predicates.	db/conf/acl/acl2010.html#GerberC10
2080385	Michael_Auli,Adam_Lopez	2011	Efficient CCG Parsing: A* versus Adaptive Supertagging.	db/conf/acl/acl2011.html#AuliL11a
2080390	Christina_Sauper,Aria_Haghighi,Regina_Barzilay	2011	Content Models with Attitude.	db/conf/acl/acl2011.html#SauperHB11
2080391	Prashanth_Mannem,Aswarth_Dara	2011	Partial Parsing from Bitext Projections.	db/conf/acl/acl2011.html#MannemD11
2080394	Ivan_Titov,Mikhail_Kozhevnikov	2010	Bootstrapping Semantic Analyzers from Non-Contradictory Texts.	db/conf/acl/acl2010.html#TitovK10
2080400	Yanjun_Ma,Yifan_He,Andy_Way,Josef_van_Genabith	2011	Consistent Translation using Discriminative Learning - A Translation Memory-inspired Approach.	db/conf/acl/acl2011.html#MaHWG11
2080407	Tomoharu_Iwata,Daichi_Mochihashi,Hiroshi_Sawada	2010	Learning Common Grammar from Multilingual Corpus.	db/conf/acl/acl2010s.html#IwataMS10
2080414	N,U,L,L	2010	Front Matter.	db/conf/acl/acl2010.html#X10
2080416	nter_Neumann,Sven_Schmeier	2011	A Mobile Touchable Application for Online Topic Graph Extraction and Exploration of Web Content.	db/conf/acl/acl2011d.html#NeumannS11
2080439	Junhui_Li,Zhaopeng_Tu,Guodong_Zhou,Josef_van_Genabith	2012	Head-Driven Hierarchical Phrase-based Translation.	db/conf/acl/acl2012-2.html#LiTZG12
2080445	ois_Mairesse,Milica_Gasic,cek,Simon_Keizer,Blaise_Thomson,Kai_Yu,Steve_J._Young	2010	Phrase-Based Statistical Language Generation Using Graphical Models and Active Learning.	db/conf/acl/acl2010.html#MairesseGJKTYY10
2080447	Arjun_Mukherjee,Bing_Liu_0001	2012	Modeling Review Comments.	db/conf/acl/acl2012-1.html#MukherjeeL12
2080457	Laura_Chiticariu,Rajasekar_Krishnamurthy,Yunyao_Li,Sriram_Raghavan,Frederick_Reiss,Shivakumar_Vaithyanathan	2010	SystemT: An Algebraic Approach to Declarative Information Extraction.	db/conf/acl/acl2010.html#ChiticariuKLRRV10
2080461	Ruihong_Huang,Ellen_Riloff	2010	Inducing Domain-Specific Semantic Class Taggers from (Almost) Nothing.	db/conf/acl/acl2010.html#HuangR10
2080467	Kevin_Gimpel,Nathan_Schneider,Brendan_O'Connor,Dipanjan_Das_0001,Daniel_Mills,Jacob_Eisenstein,Michael_Heilman,Dani_Yogatama,Jeffrey_Flanigan,Noah_A._Smith	2011	Part-of-Speech Tagging for Twitter: Annotation, Features, and Experiments.	db/conf/acl/acl2011s.html#GimpelSODMEHYFS11
2080469	Emily_M._Bender,Scott_Drellishak,Antske_Fokkens,Michael_Wayne_Goodman,Daniel_P._Mills,Laurie_Poulson,Safiyyah_Saleem	2010	Grammar Prototyping and Testing with the LinGO Grammar Matrix Customization System.	db/conf/acl/acl2010d.html#BenderDFGMPS10
2080474	Shane_Bergsma,David_Yarowsky,Kenneth_Ward_Church	2011	Using Large Monolingual and Bilingual Corpora to Improve Coordination Disambiguation.	db/conf/acl/acl2011.html#BergsmaYC11
2080475	Yun-Cheng_Ju,Tim_Paek	2010	Using Speech to Reply to SMS Messages While Driving: An In-Car Simulator User Study.	db/conf/acl/acl2010s.html#JuP10
2080476	Andrejs_Vasiljevs,Raivis_Skadins,rg_Tiedemann	2012	LetsMT!: Cloud-Based Platform for Do-It-Yourself Machine Translation.	db/conf/acl/acl2012d.html#VasiljevsST12
2080495	Beata_Beigman_Klebanov,Eyal_Beigman,Daniel_Diermeier	2010	Vocabulary Choice as an Indicator of Perspective.	db/conf/acl/acl2010s.html#KlebanovBD10
2080503	Andrei_Popescu-Belis,Majid_Yazdani,Alexandre_Nanchen,Philip_N._Garner	2011	A Speech-based Just-in-Time Retrieval System using Semantic Search.	db/conf/acl/acl2011d.html#Popescu-BelisYNG11
2080511	Roni_Ben_Aharon,Idan_Szpektor,Ido_Dagan	2010	Generating Entailment Rules from FrameNet.	db/conf/acl/acl2010s.html#AharonSD10
2080513	Zhan-yi_Liu,Haifeng_Wang,Hua_Wu,Sheng_Li	2010	Improving Statistical Machine Translation with Monolingual Collocation.	db/conf/acl/acl2010.html#LiuWWL10
2080514	Tingxu_Yan,Tamsin_Maxwell,Dawei_Song,Yuexian_Hou,Peng_Zhang_0002	2010	Event-Based Hyperspace Analogue to Language for Query Expansion.	db/conf/acl/acl2010s.html#YanMSHZ10
2080528	Joel_Lang	2011	A Scalable Probabilistic Classifier for Language Modeling.	db/conf/acl/acl2011s.html#Lang11
2080535	Richard_Johansson,Alessandro_Moschitti	2011	Extracting Opinion Expressions and Their Polarities - Exploration of Pipelines and Joint Models.	db/conf/acl/acl2011s.html#JohanssonM11
2080536	Alan_Ritter,Mausam,Oren_Etzioni	2010	A Latent Dirichlet Allocation Method for Selectional Preferences.	db/conf/acl/acl2010.html#RitterME10
2080539	Jonathan_Berant,Ido_Dagan,Meni_Adler,Jacob_Goldberger	2012	Efficient Tree-based Approximation for Entailment Graph Learning.	db/conf/acl/acl2012-1.html#BerantDAG12
2080545	Elijah_Mayfield,Ã©	2011	Recognizing Authority in Dialogue with an Integer Linear Programming Constrained Model.	db/conf/acl/acl2011.html#MayfieldR11
2080546	Srinivasan_Janarthanam,Oliver_Lemon	2010	Learning to Adapt to Unknown Users: Referring Expression Generation in Spoken Dialogue Systems.	db/conf/acl/acl2010.html#JanarthanamL10
2080556	Karolina_Owczarzak,Peter_A._Rankel,Hoa_Trang_Dang,John_M._Conroy	2012	Assessing the Effect of Inconsistent Assessors on Summarization Evaluation.	db/conf/acl/acl2012-2.html#OwczarzakRDC12
2080560	Martijn_Goudbeek,Emiel_Krahmer	2010	Preferences versus Adaptation during Referring Expression Generation.	db/conf/acl/acl2010s.html#GoudbeekK10
2080561	Arjun_Mukherjee,Bing_Liu_0001	2012	Aspect Extraction through Semi-Supervised Modeling.	db/conf/acl/acl2012-1.html#Mukherjee012
2080570	Cristian_Danescu-Niculescu-Mizil,Justin_Cheng,Jon_M._Kleinberg,Lillian_Lee	2012	You Had Me at Hello: How Phrasing Affects Memorability.	db/conf/acl/acl2012-1.html#Danescu-Niculescu-MizilCKL12
2080572	Alexandre_Davis,Adriano_Veloso,Altigran_Soares_da_Silva,Alberto_H._F._Laender,Wagner_Meira_Jr.	2012	Named Entity Disambiguation in Streaming Data.	db/conf/acl/acl2012-1.html#DavisVSLM12
2080583	Shane_Bergsma,Emily_Pitler,Dekang_Lin	2010	Creating Robust Supervised Classifiers via Web-Scale N-Gram Data.	db/conf/acl/acl2010.html#BergsmaPL10
2080587	Dirk_Hovy,Chunliang_Zhang,Eduard_H._Hovy,as	2011	Unsupervised Discovery of Domain-Specific Knowledge from Text.	db/conf/acl/acl2011.html#HovyZHP11
2080591	Tong_Xiao,Jingbo_Zhu,Hao_Zhang,Qiang_Li	2012	NiuTrans: An Open Source Toolkit for Phrase-based and Syntax-based Machine Translation.	db/conf/acl/acl2012d.html#XiaoZZL12
2080593	Kiddon,Yuriy_Brun	2011	That's What She Said: Double Entendre Identification.	db/conf/acl/acl2011s.html#KiddonB11
2080595	Bin_Wei,Christopher_J._Pal	2010	Cross Lingual Adaptation: An Experiment on Sentiment Classifications.	db/conf/acl/acl2010s.html#WeiP10
2080596	Jenny_Rose_Finkel,Christopher_D._Manning	2010	Hierarchical Joint Learning: Improving Joint Parsing and Named Entity Recognition with Non-Jointly Labeled Data.	db/conf/acl/acl2010.html#FinkelM10
2080599	Graeme_W._Blackwood,de_Gispert,William_J._Byrne	2010	Efficient Path Counting Transducers for Minimum Bayes-Risk Decoding of Statistical Machine Translation Lattices.	db/conf/acl/acl2010s.html#BlackwoodGB10
2080614	Joern_Wuebker,Hermann_Ney,Richard_Zens	2012	Fast and Scalable Decoding with Language Model Look-Ahead for Phrase-based Statistical Machine Translation.	db/conf/acl/acl2012-2.html#WuebkerNZ12
2080617	Konstantina_Garoufi,Alexander_Koller	2010	Automated Planning for Situated Natural Language Generation.	db/conf/acl/acl2010.html#GaroufiK10
2080619	Yue_Zhang_0004,Stephen_Clark	2011	Shift-Reduce CCG Parsing.	db/conf/acl/acl2011.html#ZhangC11
2080633	Carolina_Parada,Mark_Dredze,Abhinav_Sethy,Ariya_Rastrow	2011	Learning Sub-Word Units for Open Vocabulary Speech Recognition.	db/conf/acl/acl2011.html#ParadaDSR11
2080634	Fangtao_Li,Sinno_Jialin_Pan,Ou_Jin,Qiang_Yang_0001,Xiaoyan_Zhu	2012	Cross-Domain Co-Extraction of Sentiment and Topic Lexicons.	db/conf/acl/acl2012-1.html#LiPJYZ12
2080637	Zhi_Zhong,Hwee_Tou_Ng	2010	It Makes Sense: A Wide-Coverage Word Sense Disambiguation System for Free Text.	db/conf/acl/acl2010d.html#ZhongN10
2080656	Cecilia_Ovesdotter_Alm	2011	Subjective Natural Language Problems: Motivations, Applications, Characterizations, and Implications.	db/conf/acl/acl2011s.html#Alm11
2080663	Sam_Sahakian,Benjamin_Snyder	2012	Automatically Learning Measures of Child Language Development.	db/conf/acl/acl2012-2.html#SahakianS12
2080665	Rebecca_Dridan,Stephan_Oepen	2012	Tokenization: Returning to a Long Solved Problem - A Survey, Contrastive Experiment, Recommendations, and Toolkit -.	db/conf/acl/acl2012-2.html#DridanO12
2080668	Susan_Howlett,Mark_Dras	2011	Clause Restructuring For SMT Not Absolutely Helpful.	db/conf/acl/acl2011s.html#HowlettD11
2080675	Morgan_Sonderegger,Partha_Niyogi	2010	Combining Data and Mathematical Models of Language Change.	db/conf/acl/acl2010.html#SondereggerN10
2080690	Colin_Cherry,Shane_Bergsma	2011	Joint Training of Dependency Parsing Filters through Latent Support Vector Machines.	db/conf/acl/acl2011s.html#CherryB11
2080692	Taniya_Mishra,Srinivas_Bangalore	2010	Speech-Driven Access to the Deep Web on Mobile Devices.	db/conf/acl/acl2010d.html#MishraB10
2080693	Shay_B._Cohen,Noah_A._Smith	2010	Viterbi Training for PCFGs: Hardness Results and Competitiveness of Uniform Initialization.	db/conf/acl/acl2010.html#CohenS10
2080698	Prasanth_Kolachina,Nicola_Cancedda,Marc_Dymetman,Sriram_Venkatapathy	2012	Prediction of Learning Curves in Machine Translation.	db/conf/acl/acl2012-1.html#KolachinaCDV12
2080707	Sylvain_Schmitz	2010	On the Computational Complexity of Dominance Links in Grammatical Formalisms.	db/conf/acl/acl2010.html#Schmitz10
2080708	Sebastian_Spiegler,Peter_A._Flach	2010	Enhanced Word Decomposition by Calibrating the Decision Threshold of Probabilistic Models and Using a Model Ensemble.	db/conf/acl/acl2010.html#SpieglerF10
2080709	Cigdem_Toprak,Niklas_Jakob,Iryna_Gurevych	2010	Sentence and Expression Level Annotation of Opinions in User-Generated Discourse.	db/conf/acl/acl2010.html#ToprakJG10
2080710	Arianna_Bisazza,Marcello_Federico	2012	Modified Distortion Matrices for Phrase-Based Statistical Machine Translation.	db/conf/acl/acl2012-1.html#BisazzaF12
2080711	Jingbo_Zhu,Tong_Xiao	2011	Improving Decoding Generalization for Tree-to-String Translation.	db/conf/acl/acl2011s.html#ZhuX11
2080719	Yashar_Mehdad,Matteo_Negri,Marcello_Federico	2011	Using Bilingual Parallel Corpora for Cross-Lingual Textual Entailment.	db/conf/acl/acl2011.html#MehdadNF11
2080724	Zhongguo_Li	2011	Parsing the Internal Structure of Words: A New Paradigm for Chinese Word Segmentation.	db/conf/acl/acl2011.html#Li11
2080726	Nathan_Schneider,Behrang_Mohit,Kemal_Oflazer,Noah_A._Smith	2012	Coarse Lexical Semantic Annotation with Supersenses: An Arabic Case Study.	db/conf/acl/acl2012-2.html#SchneiderMOS12
2080731	Dirk_Hovy,Ashish_Vaswani,Stephen_Tratz,David_Chiang,Eduard_H._Hovy	2011	Models and Training for Unsupervised Preposition Sense Disambiguation.	db/conf/acl/acl2011s.html#HovyVTCH11
2080740	Andreas_Zollmann,Stephan_Vogel	2011	A Word-Class Approach to Labeling PSCFG Rules for Machine Translation.	db/conf/acl/acl2011.html#ZollmannV11
2080744	N,U,L,L	2011	Front Matter.	db/conf/acl/acl2011t.html#X11d
2080758	Xianchao_Wu,Takuya_Matsuzaki,Jun'ichi_Tsujii	2012	Akamon: An Open Source Toolkit for Tree/Forest-Based Statistical Machine Translation.	db/conf/acl/acl2012d.html#WuMT12
2080763	Alexander_M._Rush,Michael_Collins	2011	Exact Decoding of Syntactic Translation Models through Lagrangian Relaxation.	db/conf/acl/acl2011.html#RushC11
2080764	Qiuye_Zhao,Mitch_Marcus	2012	Exploring Deterministic Constraints: from a Constrained English POS Tagger to an Efficient ILP Solution to Chinese Word Segmentation.	db/conf/acl/acl2012-1.html#ZhaoM12
2080770	Amar_Subramanya,Partha_Pratim_Talukdar	2012	Graph-based Semi-Supervised Learning Algorithms for NLP.	db/conf/acl/acl2012t.html#SubramanyaT12
2080779	Shujian_Huang,Stephan_Vogel,Jiajun_Chen	2011	Dealing with Spurious Ambiguity in Learning ITG-based Word Alignment.	db/conf/acl/acl2011s.html#HuangVC11
2080785	Gregory_Druck,Kuzman_Ganchev,a	2011	Rich Prior Knowledge in Learning for Natural Language Processing.	db/conf/acl/acl2011t.html#DruckGG11
2080797	Nizar_Habash,Ryan_Roth	2011	Using Deep Morphology to Improve Automatic Error Detection in Arabic Handwriting Recognition.	db/conf/acl/acl2011.html#HabashR11
2080799	Nathan_Bodenstab,Aaron_Dunlop,Keith_B._Hall,Brian_Roark	2011	Beam-Width Prediction for Efficient Context-Free Parsing.	db/conf/acl/acl2011.html#BodenstabDHR11
2080801	Moshe_Koppel,Navot_Akiva,Idan_Dershowitz,Nachum_Dershowitz	2011	Unsupervised Decomposition of a Document into Authorial Components.	db/conf/acl/acl2011.html#KoppelADD11
2080805	Vicent_Alabau,s,Francisco_Casacuberta	2011	Improving On-line Handwritten Recognition using Translation Models in Multimodal Interactive Machine Translation.	db/conf/acl/acl2011s.html#AlabauSC11
2080811	Yifan_He,Yanjun_Ma,Josef_van_Genabith,Andy_Way	2010	Bridging SMT and TM with Translation Recommendation.	db/conf/acl/acl2010.html#HeMGW10
2080812	Francisco_Costa,nio_Branco	2010	Temporal Information Processing of a New Language: Fast Porting with Minimal Resources.	db/conf/acl/acl2010.html#CostaB10
2080816	Paramveer_S._Dhillon,Partha_Pratim_Talukdar,Koby_Crammer	2010	Learning Better Data Representation Using Inference-Driven Metric Learning.	db/conf/acl/acl2010s.html#DhillonTC10
2080824	Oliver_S._Schneider,Alex_Garnett	2011	ConsentCanvas: Automatic Texturing for Improved Readability in End-User License Agreements.	db/conf/acl/acl2011r.html#SchneiderG11
2080827	zbal,Carlo_Strapparava	2012	A Computational Approach to the Automation of Creative Naming.	db/conf/acl/acl2012-1.html#OzbalS12
2080854	Tony_Veale	2012	A Context-sensitive, Multi-faceted Model of Lexico-Conceptual Affect.	db/conf/acl/acl2012-2.html#Veale12
2080856	Yabin_Zheng,Zhiyuan_Liu,Lixing_Xie	2010	Growing Related Words from Seed via User Behaviors: A Re-Ranking Based Approach.	db/conf/acl/acl2010r.html#ZhengLX10
2080858	Kotaro_Kitagawa,Kumiko_Tanaka-Ishii	2010	Tree-Based Deterministic Dependency Parsing - An Application to Nivre's Method -.	db/conf/acl/acl2010s.html#KitagawaT10
2080860	Nadir_Durrani,Helmut_Schmid,Alexander_M._Fraser	2011	A Joint Sequence Translation Model with Integrated Reordering.	db/conf/acl/acl2011.html#DurraniSF11
2080872	Marcis_Pinnis,Radu_Ion,Dan_Stefanescu,Fangzhong_Su,Inguna_Skadina,Andrejs_Vasiljevs,Bogdan_Babych	2012	ACCURAT Toolkit for Multi-Level Alignment and Information Extraction from Comparable Corpora.	db/conf/acl/acl2012d.html#PinnisISSSVB12
2080876	Fei_Liu_0004,Fuliang_Weng,Bingqing_Wang,Yang_Liu_0004	2011	Insertion, Deletion, or Substitution? Normalizing Text Messages without Pre-categorization nor Supervision.	db/conf/acl/acl2011s.html#LiuWWL11
2080877	Peng_Li,Jing_Jiang,Yinglin_Wang	2010	Generating Templates of Entity Summaries with an Entity-Aspect Model and Pattern Mining.	db/conf/acl/acl2010.html#LiJW10
2080878	Bo_Han,Timothy_Baldwin	2011	Lexical Normalisation of Short Text Messages: Makn Sens a #twitter.	db/conf/acl/acl2011.html#HanB11
2080879	Daphna_Shezaf,Ari_Rappoport	2010	Bilingual Lexicon Generation Using Non-Aligned Signatures.	db/conf/acl/acl2010.html#ShezafR10
2080883	Denis_Filimonov,Mary_P._Harper	2011	Generalized Interpolation in Decision Tree LM.	db/conf/acl/acl2011s.html#FilimonovH11
2080884	Nikhil_Garg,James_Henderson	2011	Temporal Restricted Boltzmann Machines for Dependency Parsing.	db/conf/acl/acl2011s.html#GargH11
2080893	Xiaohua_Liu,Shaodian_Zhang,Furu_Wei,Ming_Zhou	2011	Recognizing Named Entities in Tweets.	db/conf/acl/acl2011.html#LiuZWZ11
2080897	Xianpei_Han,Jun_Zhao_0001	2010	Structural Semantic Relatedness: A Knowledge-Based Method to Named Entity Disambiguation.	db/conf/acl/acl2010.html#HanZ10
2080906	Nikhil_Garg,James_Henserdon	2012	Unsupervised Semantic Role Induction with Global Role Ordering.	db/conf/acl/acl2012-2.html#GargH12
2080911	Viet-An_Nguyen,Jordan_L._Boyd-Graber,Philip_Resnik	2012	SITS: A Hierarchical Nonparametric Model using Speaker Identity for Topic Segmentation in Multiparty Conversations.	db/conf/acl/acl2012-1.html#NguyenBR12
2080925	Barbara_Plank,Gertjan_van_Noord	2011	Effective Measures of Domain Similarity for Parsing.	db/conf/acl/acl2011.html#PlankN11
2080927	Ang_Sun,Ralph_Grishman,Satoshi_Sekine	2011	Semi-supervised Relation Extraction with Large-scale Word Clustering.	db/conf/acl/acl2011.html#SunGS11
2080937	Seyed_Abolghasem_Mirroshandel,Alexis_Nasr,Joseph_Le_Roux	2012	Semi-supervised Dependency Parsing using Lexical Affinities.	db/conf/acl/acl2012-1.html#MirroshandelNR12
2080944	David_Chiang,Steve_DeNeefe,Michael_Pust	2011	Two Easy Improvements to Lexical Weighting.	db/conf/acl/acl2011s.html#ChiangDP11
2080945	Dong_Wang,Yang_Liu_0004	2011	A Pilot Study of Opinion Summarization in Conversations.	db/conf/acl/acl2011.html#WangL11
2080958	Antske_Fokkens	2011	Metagrammar engineering: Towards systematic exploration of implemented grammars.	db/conf/acl/acl2011.html#Fokkens11
2080964	Rada_Mihalcea,Carmen_Banea,Janyce_Wiebe	2012	Multilingual Subjectivity and Sentiment Analysis.	db/conf/acl/acl2012t.html#MihalceaBW12
2080969	Yashar_Mehdad,Matteo_Negri,Marcello_Federico	2012	Detecting Semantic Equivalence and Information Disparity in Cross-lingual Documents.	db/conf/acl/acl2012-2.html#MehdadNF12
2080970	Seon_Yang,Youngjoong_Ko	2011	Extracting Comparative Entities and Predicates from Texts Using Comparative Type Classification.	db/conf/acl/acl2011.html#YangK11
2080972	John_Lee,Jason_Naradowsky,David_A._Smith	2011	A Discriminative Model for Joint Morphological Disambiguation and Dependency Parsing.	db/conf/acl/acl2011.html#LeeNS11
2080986	Jenny_Liu,Aria_Haghighi	2011	Ordering Prenominal Modifiers with a Reranking Approach.	db/conf/acl/acl2011.html#LiuH11
2080998	Peter_LoBue,Alexander_Yates	2011	Types of Common-Sense Knowledge Needed for Recognizing Textual Entailment.	db/conf/acl/acl2011s.html#LoBueY11
2081001	Apoorv_Agarwal,Adinoyi_Omuya,Aaron_Harnly,Owen_Rambow	2012	A Comprehensive Gold Standard for the Enron Organizational Hierarchy.	db/conf/acl/acl2012-2.html#AgarwalOHR12
2081002	Wenbin_Jiang,Qun_Liu	2010	Dependency Parsing and Projection Based on Word-Pair Classification.	db/conf/acl/acl2010.html#JiangL10
2081003	Tagyoung_Chung,Licheng_Fang,Daniel_Gildea	2011	Issues Concerning Decoding with Synchronous Context-free Grammar.	db/conf/acl/acl2011s.html#ChungFG11
2081004	Dipanjan_Das_0001,Noah_A._Smith	2011	Semi-Supervised Frame-Semantic Parsing for Unknown Predicates.	db/conf/acl/acl2011.html#DasS11
2081005	Lei_Zhang_0016,Bing_Liu_0001	2011	Identifying Noun Product Features that Imply Opinions.	db/conf/acl/acl2011s.html#ZhangL11
2081010	Jonathan_K._Kummerfeld,Jessika_Roesner,Tim_Dawborn,James_Haggerty,James_R._Curran,Stephen_Clark	2010	Faster Parsing by Supertagger Adaptation.	db/conf/acl/acl2010.html#KummerfeldRDHCC10
2081014	Wen_Chan,Xiangdong_Zhou,Wei_Wang_0009,Tat-Seng_Chua	2012	Community Answer Summarization for Multi-Sentence Question with Group L1 Regularization.	db/conf/acl/acl2012-1.html#ChanZWC12
2081018	ller_0009,Hinrich_Schuetze	2011	Improved Modeling of Out-Of-Vocabulary Words Using Morphological Classes.	db/conf/acl/acl2011s.html#MuellerS11
2081049	Martin_Haulrich	2010	Transition-Based Parsing with Confidence-Weighted Classification.	db/conf/acl/acl2010r.html#Haulrich10
2081051	Michael_L._Wick,Sameer_Singh_0001,Andrew_McCallum	2012	A Discriminative Hierarchical Model for Fast Coreference at Large Scale.	db/conf/acl/acl2012-1.html#WickSM12
2081054	Vipul_Mittal	2010	Automatic Sanskrit Segmentizer Using Finite State Transducers.	db/conf/acl/acl2010r.html#Mittal10
2081056	Niklas_Jakob,Iryna_Gurevych	2010	Using Anaphora Resolution to Improve Opinion Target Identification in Movie Reviews.	db/conf/acl/acl2010s.html#JakobG10
2081058	Hiroyuki_Shindo,Akinori_Fujino,Masaaki_Nagata	2010	Word Alignment with Synonym Regularization.	db/conf/acl/acl2010s.html#ShindoFN10
2081060	N,U,L,L	2010	Front Matter.	db/conf/acl/acl2010r.html#X10b
2081097	Daniil_Umanski,Federico_Sangati	2010	How Spoken Language Corpora Can Refine Current Speech Motor Training Methodologies.	db/conf/acl/acl2010r.html#UmanskiS10
2081099	Daniel_Dahlmeier,Hwee_Tou_Ng	2011	Grammatical Error Correction with Alternating Structure Optimization.	db/conf/acl/acl2011.html#DahlmeierN11
2081104	N,U,L,L	2011	Front Matter.	db/conf/acl/acl2011s.html#X11a
2081105	elikyilmaz,r	2011	Discovery of Topically Coherent Sentences for Extractive Summarization.	db/conf/acl/acl2011.html#CelikyilmazH11
2081108	William_Yang_Wang,Elijah_Mayfield,Suresh_Naidu,Jeremiah_Dittmar	2012	Historical Analysis of Legal Opinions with a Sparse Mixed-Effects Latent Variable Model.	db/conf/acl/acl2012-1.html#WangMND12
2081110	Naomi_Zeichner,Jonathan_Berant,Ido_Dagan	2012	Crowdsourcing Inference-Rule Evaluation.	db/conf/acl/acl2012-2.html#ZeichnerBD12
2081118	Eyal_Shnarch,Jacob_Goldberger,Ido_Dagan	2011	A Probabilistic Modeling Framework for Lexical Entailment.	db/conf/acl/acl2011s.html#ShnarchGD11
2081119	Nils_Reiter,Anette_Frank	2010	Identifying Generic Noun Phrases.	db/conf/acl/acl2010.html#ReiterF10
2081122	Rafael_E._Banchs,Haizhou_Li	2011	AM-FM: A Semantic Framework for Translation Quality Assessment.	db/conf/acl/acl2011s.html#BanchsL11
2081125	Shingo_Takamatsu,Issei_Sato,Hiroshi_Nakagawa	2012	Reducing Wrong Labels in Distant Supervision for Relation Extraction.	db/conf/acl/acl2012-1.html#TakamatsuSN12
2081134	Thomas_Lippincott,Anna_Korhonen,aghdha	2012	Learning Syntactic Verb Frames using Graphical Models.	db/conf/acl/acl2012-1.html#LippincottKS12
2081139	e,Mikko_Kurimo	2010	Domain Adaptation of Maximum Entropy Language Models.	db/conf/acl/acl2010s.html#AlumaeK10
2081150	N,U,L,L	2011	Front Matter.	db/conf/acl/acl2011d.html#X11c
2081153	tze	2011	Integrating history-length interpolation and classes in language modeling.	db/conf/acl/acl2011.html#Schutze11
2081160	Eric_P._Xing	2012	Topic Models, Latent Space Models, Sparse Coding, and All That: A Systematic Understanding of Probabilistic Semantic Extraction in Large Corpus.	db/conf/acl/acl2012t.html#Xing12
2081164	David_K._Elson,Nicholas_Dames,Kathleen_McKeown	2010	Extracting Social Networks from Literary Fiction.	db/conf/acl/acl2010.html#ElsonDM10
2081165	III	2011	Beyond Structured Prediction: Inverse Reinforcement Learning.	db/conf/acl/acl2011t.html#Daume11
2081178	Michael_Lamar,Yariv_Maron,Mark_Johnson,Elie_Bienenstock	2010	SVD and Clustering for Unsupervised POS Tagging.	db/conf/acl/acl2010s.html#LamarMJB10
2081179	Nan_Duan,Mu_Li,Ming_Zhou	2011	Hypothesis Mixture Decoding for Statistical Machine Translation.	db/conf/acl/acl2011.html#DuanLZ11
2081183	Verena_Rieser,Oliver_Lemon,Xingkun_Liu	2010	Optimising Information Presentation for Spoken Dialogue Systems.	db/conf/acl/acl2010.html#RieserLL10
2081184	Souneil_Park,Kyung_Soon_Lee,Junehwa_Song	2011	Contrasting Opposing Views of News Articles on Contentious Issues.	db/conf/acl/acl2011.html#ParkLS11
2081197	Yorick_Wilks,Roberta_Catizone,Alexiei_Dingli,Weiwei_Cheng	2010	Demonstration of a Prototype for a Conversational Companion for Reminiscing about Images.	db/conf/acl/acl2010d.html#WilksCDC10
2081201	Yuping_Zhou,Nianwen_Xue	2012	PDTB-style Discourse Annotation of Chinese Text.	db/conf/acl/acl2012-1.html#ZhouX12
2081203	Moshe_Koppel,Noam_Ordan	2011	Translationese and Its Dialects.	db/conf/acl/acl2011.html#KoppelO11
2081204	t_Theune,Ruud_Koolen,Emiel_Krahmer,Sander_Wubben	2011	Does Size Matter - How Much Data is Required to Train a REG Algorithm?	db/conf/acl/acl2011s.html#TheuneKKW11
2081207	Shasha_Liao,Ralph_Grishman	2011	Can Document Selection Help Semi-supervised Learning? A Case Study On Event Extraction.	db/conf/acl/acl2011s.html#LiaoG11
2081209	Daria_Bogdanova	2010	A Framework for Figurative Language Detection Based on Sense Differentiation.	db/conf/acl/acl2010r.html#Bogdanova10
2081210	David_Stallard,Jacob_Devlin,Michael_Kayser,Yoong_Keok_Lee,Regina_Barzilay	2012	Unsupervised Morphology Rivals Supervised Morphology for Arabic MT.	db/conf/acl/acl2012-2.html#StallardDKLB12
2081214	Emilia_Apostolova,Noriko_Tomuro,Dina_Demner-Fushman	2011	Automatic Extraction of Lexico-Syntactic Patterns for Detection of Negation and Speculation Scopes.	db/conf/acl/acl2011s.html#ApostolovaTD11
2081218	Je_Hun_Jeon,Wen_Wang,Yang_Liu_0004	2011	N-Best Rescoring Based on Pitch-accent Patterns.	db/conf/acl/acl2011.html#JeonWL11
2081219	Andrew_L._Maas,Raymond_E._Daly,Peter_T._Pham,Dan_Huang,Andrew_Y._Ng,Christopher_Potts	2011	Learning Word Vectors for Sentiment Analysis.	db/conf/acl/acl2011.html#MaasDPHNP11
2081228	Bo_Li_0012,ric_Gaussier,Akiko_N._Aizawa	2011	Clustering Comparable Corpora For Bilingual Lexicon Extraction.	db/conf/acl/acl2011s.html#LiGA11
2081233	Vanessa_Wei_Feng,Graeme_Hirst	2011	Classifying arguments by scheme.	db/conf/acl/acl2011.html#FengH11
2081234	Percy_Liang,Michael_I._Jordan,Dan_Klein	2011	Learning Dependency-Based Compositional Semantics.	db/conf/acl/acl2011.html#LiangJK11
2081241	Yu_Hong,Jianfeng_Zhang,Bin_Ma,Jian-Min_Yao,Guodong_Zhou,Qiaoming_Zhu	2011	Using Cross-Entity Inference to Improve Event Extraction.	db/conf/acl/acl2011.html#HongZMYZZ11
2081242	Katrin_Erk,Ã³	2010	Exemplar-Based Models for Word Meaning in Context.	db/conf/acl/acl2010s.html#ErkP10
2081245	Elif_Yamangil,Stuart_M._Shieber	2010	Bayesian Synchronous Tree-Substitution Grammar Induction and Its Application to Sentence Compression.	db/conf/acl/acl2010.html#YamangilS10
2081262	wer,Peter_Adolphs,Feiyu_Xu,Hans_Uszkoreit,Xiwen_Cheng	2010	Talking NPCs in a Virtual Game World.	db/conf/acl/acl2010d.html#KluwerAXUC10
2081263	Eric_Corlett,Gerald_Penn	2010	An Exact A* Method for Deciphering Letter-Substitution Ciphers.	db/conf/acl/acl2010.html#CorlettP10
2081265	Hiroshi_Echizen-ya,Kenji_Araki	2010	Automatic Evaluation Method for Machine Translation Using Noun-Phrase Chunking.	db/conf/acl/acl2010.html#Echizen-yaA10
2081268	Marjorie_Freedman,Alex_Baron,Vasin_Punyakanok,Ralph_M._Weischedel	2011	Language Use: What can it tell us?	db/conf/acl/acl2011s.html#FreedmanBPW11
2081273	Luc_Boruta	2011	Combining Indicators of Allophony.	db/conf/acl/acl2011r.html#Boruta11
2081278	Rafal_Rak,BalaKrishna_Kolluru,Sophia_Ananiadou	2012	Building Trainable Taggers in a Web-based, UIMA-Supported NLP Workbench.	db/conf/acl/acl2012d.html#RakKA12
2081289	Bittar,Pascal_Amsili,Pascal_Denis,Laurence_Danlos	2011	French TimeBank: An ISO-TimeML Annotated Reference Corpus.	db/conf/acl/acl2011s.html#BittarADD11
2081299	Bing_Xiang,Yonggang_Deng,Bowen_Zhou	2010	Diversify and Combine: Improving Word Alignment for Machine Translation on Low-Resource Languages.	db/conf/acl/acl2010s.html#XiangDZ10
2081330	Amjad_Abu-Jbara,Pradeep_Dasigi,Mona_T._Diab,Dragomir_R._Radev	2012	Subgroup Detection in Ideological Discussions.	db/conf/acl/acl2012-1.html#Abu-JbaraDDR12
2081337	Bharat_Ram_Ambati	2010	Importance of Linguistic Constraints in Statistical Dependency Parsing.	db/conf/acl/acl2010r.html#Ambati10
2081339	Seth_Kulick	2010	Simultaneous Tokenization and Part-Of-Speech Tagging for Arabic without a Morphological Analyzer.	db/conf/acl/acl2010s.html#Kulick10
2081341	Long_Jiang,Mo_Yu,Ming_Zhou,Xiaohua_Liu,Tiejun_Zhao	2011	Target-dependent Twitter Sentiment Classification.	db/conf/acl/acl2011.html#JiangYZLZ11
2081343	Fan_Zhang,Shuming_Shi,Jing_Liu,Shuqi_Sun,Chin-Yew_Lin	2011	Nonlinear Evidence Fusion and Propagation for Hyponymy Relation Mining.	db/conf/acl/acl2011.html#ZhangSLSL11
2081351	N,U,L,L	2012	Front Matter.	db/conf/acl/acl2012-2.html#X12c
2081355	Christian_Chiarcos	2010	Towards Robust Multi-Tool Tagging. An OWL/DL-Based Approach.	db/conf/acl/acl2010.html#Chiarcos10
2081359	Fahad_Alotaiby	2011	Automatic Headline Generation using Character Cross-Correlation.	db/conf/acl/acl2011r.html#Alotaiby11
2081360	Wen_Wang,Sibel_Yaman,Kristin_Precoda,Colleen_Richey,Geoffrey_Raymond	2011	Detection of Agreement and Disagreement in Broadcast Conversations.	db/conf/acl/acl2011s.html#WangYPRR11
2081362	Dave_Golland,John_DeNero,Jakob_Uszkoreit	2012	A Feature-Rich Constituent Context Model for Grammar Induction.	db/conf/acl/acl2012-2.html#GollandDU12
2081375	Michael_Subotin	2011	An exponential translation model for target language morphology.	db/conf/acl/acl2011.html#Subotin11
2081379	Qin_Gao,Stephan_Vogel	2011	Corpus Expansion for Statistical Machine Translation with Semantic Role Label Substitution Rules.	db/conf/acl/acl2011s.html#GaoV11
2081380	Ahmed_Hassan_Awadallah,Amjad_Abu-Jbara,Rahul_Jha,Dragomir_R._Radev	2011	Identifying the Semantic Orientation of Foreign Words.	db/conf/acl/acl2011s.html#HassanAJR11
2081389	Michael_Connor,Yael_Gertner,Cynthia_Fisher,Dan_Roth	2010	Starting from Scratch in Semantic Role Labeling.	db/conf/acl/acl2010.html#ConnorGFR10
2081410	Renxian_Zhang	2011	Sentence Ordering Driven by Local and Global Coherence for Summary Generation.	db/conf/acl/acl2011r.html#Zhang11
2081415	Hamidreza_Kobdani,tze,Michael_Schiehlen,Hans_Kamp	2011	Bootstrapping coreference resolution using word associations.	db/conf/acl/acl2011.html#KobdaniSSK11
2081416	Adam_Pauls,Dan_Klein	2011	Faster and Smaller N-Gram Language Models.	db/conf/acl/acl2011.html#PaulsK11
2081429	Bing_Zhao,Young-Suk_Lee,Xiaoqiang_Luo,Liu_Li	2011	Learning to Transform and Select Elementary Trees for Improved Syntax-based Machine Translations.	db/conf/acl/acl2011.html#ZhaoLLL11
2081440	Rafael_E._Banchs	2012	Movie-DiC: a Movie Dialogue Corpus for Research and Development.	db/conf/acl/acl2012-2.html#Banchs12
2081448	Yoshihide_Kato,Shigeki_Matsubara	2010	Correcting Errors in a Treebank Based on Synchronous Tree Substitution Grammar.	db/conf/acl/acl2010s.html#KatoM10
2081449	Jey_Han_Lau,Karl_Grieser,David_Newman,Timothy_Baldwin	2011	Automatic Labelling of Topic Models.	db/conf/acl/acl2011.html#LauGNB11
2081459	Mohit_Bansal,Dan_Klein	2012	Coreference Semantics from Web Features.	db/conf/acl/acl2012-1.html#BansalK12
2081462	Coskun_Mermer,Murat_Saraclar	2011	Bayesian Word Alignment for Statistical Machine Translation.	db/conf/acl/acl2011s.html#MermerS11
2081466	Viet_Ha-Thuc,Nicola_Cancedda	2011	Confidence-Weighted Learning of Factored Discriminative Language Models.	db/conf/acl/acl2011s.html#Ha-ThucC11
2081467	Hao_Tang,Joseph_Keshet,Karen_Livescu	2012	Discriminative Pronunciation Modeling: A Large-Margin, Feature-Rich Approach.	db/conf/acl/acl2012-1.html#TangKL12
2081468	Staffan_Larsson,Alexander_Berman,Jessica_Villing	2011	Multimodal Menu-based Dialogue with Speech Cursor in DICO II+.	db/conf/acl/acl2011d.html#LarssonBV11
2081471	Adam_Pauls,Dan_Klein,Chris_Quirk	2010	Top-Down K-Best A* Parsing.	db/conf/acl/acl2010s.html#PaulsKQ10
2081472	Sankaranarayanan_Ananthakrishnan,Rohit_Prasad,Prem_Natarajan	2011	On-line Language Model Biasing for Statistical Machine Translation.	db/conf/acl/acl2011s.html#AnanthakrishnanPN11
2081475	Elias_Ponvert,Jason_Baldridge,Katrin_Erk	2011	Simple Unsupervised Grammar Induction from Raw Text with Cascaded Finite State Models.	db/conf/acl/acl2011.html#PonvertBE11
2081476	Yanir_Seroussi,Fabian_Bohnert,Ingrid_Zukerman	2012	Authorship Attribution with Author-aware Topic Models.	db/conf/acl/acl2012-2.html#SeroussiBZ12
2081478	Hailong_Cao,Eiichiro_Sumita	2010	Filtering Syntactic Constraints for Statistical Machine Translation.	db/conf/acl/acl2010s.html#CaoS10
2081497	Weiwei_Guo,Mona_T._Diab	2012	Learning the Latent Semantics of a Concept from its Definition.	db/conf/acl/acl2012-2.html#GuoD12a
2081503	Wenliang_Chen,Min_Zhang_0005,Haizhou_Li	2012	Utilizing Dependency Language Models for Graph-based Dependency Parsing Models.	db/conf/acl/acl2012-1.html#ChenZL12
2081504	Roger_Levy	2011	Integrating surprisal and uncertain-input models in online sentence comprehension: formal techniques and empirical results.	db/conf/acl/acl2011.html#Levy11
2081513	Miao_Chen,Klaus_Zechner	2011	Computing and Evaluating Syntactic Complexity Features for Automated Scoring of Spontaneous Non-Native Speech.	db/conf/acl/acl2011.html#ChenZ11
2081522	Mitesh_M._Khapra,Anup_Kulkarni,Saurabh_Sohoney,Pushpak_Bhattacharyya	2010	All Words Domain Adapted WSD: Finding a Middle Ground between Supervision and Unsupervision.	db/conf/acl/acl2010.html#KhapraKSB10
2081538	Emily_Pitler	2012	Attacking Parsing Bottlenecks with Unlabeled Data and Relevant Factorizations.	db/conf/acl/acl2012-1.html#Pitler12
2081540	Mohit_Bansal,Dan_Klein	2011	Web-Scale Features for Full-Scale Parsing.	db/conf/acl/acl2011.html#BansalK11
2081542	Xianchao_Wu,Takuya_Matsuzaki,Jun'ichi_Tsujii	2011	Effective Use of Function Words for Rule Generalization in Forest-Based Translation.	db/conf/acl/acl2011.html#WuMT11
2081546	Trevor_Cohn,Phil_Blunsom	2010	Blocked Inference in Bayesian Tree Substitution Grammars.	db/conf/acl/acl2010s.html#CohnB10
2081553	Muhammad_Abdul-Mageed,Mona_T._Diab,Mohammed_Korayem	2011	Subjectivity and Sentiment Analysis of Modern Standard Arabic.	db/conf/acl/acl2011s.html#Abdul-MageedDK11
2081560	Weiwei_Sun	2010	Improving Chinese Semantic Role Labeling with Rich Syntactic Features.	db/conf/acl/acl2010s.html#Sun10a
2081561	Katja_Markert,Yufang_Hou,Michael_Strube_0001	2012	Collective Classification for Fine-grained Information Status.	db/conf/acl/acl2012-1.html#MarkertHS12
2081564	Cheng-Te_Li,Chien-Yuan_Wang,Chien-Lin_Tseng,Shou-De_Lin	2011	MemeTube: A Sentiment-based Audiovisual System for Analyzing and Displaying Microblog Messages.	db/conf/acl/acl2011d.html#LiWTL11
2081572	Masato_Hagiwara,Satoshi_Sekine	2011	Latent Class Transliteration based on Source Language Origin.	db/conf/acl/acl2011s.html#HagiwaraS11
2081574	Aditya_Joshi,Balamurali_A._R.,Pushpak_Bhattacharyya,Rajat_Kumar_Mohanty	2011	C-Feel-It: A Sentiment Analyzer for Micro-blogs.	db/conf/acl/acl2011d.html#JoshiABM11
2081585	Hiroyuki_Shindo,Akinori_Fujino,Masaaki_Nagata	2011	Insertion Operator for Bayesian Tree Substitution Grammars.	db/conf/acl/acl2011s.html#ShindoFN11
2081586	Richard_Beaufort,Sophie_Roekhaut,lie_Cougnon,drick_Fairon	2010	A Hybrid Rule/Model-Based Finite-State Framework for Normalizing SMS Messages.	db/conf/acl/acl2010.html#BeaufortRCF10
2081592	Brian_Roark,Richard_Sproat,Cyril_Allauzen,Michael_Riley,Jeffrey_Sorensen,Terry_Tai	2012	The OpenGrm open-source finite-state grammar software libraries.	db/conf/acl/acl2012d.html#RoarkSARST12
2081596	Mohit_Bansal,Chris_Quirk,Robert_C._Moore	2011	Gappy Phrasal Alignment By Agreement.	db/conf/acl/acl2011.html#BansalQM11
2081597	Greg_Durrett,Dan_Klein	2011	An Empirical Investigation of Discounting in Cross-Domain Language Models.	db/conf/acl/acl2011s.html#DurrettK11
2081606	Patrick_Pantel,Thomas_Lin,Michael_Gamon	2012	Mining Entity Types from Query Logs via User Intent Modeling.	db/conf/acl/acl2012-1.html#PantelLG12
2081615	Samuel_Brody,Paul_B._Kantor	2011	Automatic Assessment of Coverage Quality in Intelligence Reports.	db/conf/acl/acl2011s.html#BrodyK11
2081631	Steven_P._Abney,Steven_Bird	2010	The Human Language Project: Building a Universal Corpus of the World's Languages.	db/conf/acl/acl2010.html#AbneyB10
2081636	Svetlana_Kiritchenko,Colin_Cherry	2011	Lexically-Triggered Hidden Markov Models for Clinical Document Coding.	db/conf/acl/acl2011.html#KiritchenkoC11
2081644	Simone_Paolo_Ponzetto,Roberto_Navigli	2010	Knowledge-Rich Word Sense Disambiguation Rivaling Supervised Systems.	db/conf/acl/acl2010.html#PonzettoN10
2081647	John_DeNero,Klaus_Macherey	2011	Model-Based Aligner Combination Using Dual Decomposition.	db/conf/acl/acl2011.html#DeNeroM11
2081649	Matt_Garley,Julia_Hockenmaier	2012	Beefmoves: Dissemination, Diversity, and Dynamics of English Borrowings in a German Hip Hop Forum.	db/conf/acl/acl2012-2.html#GarleyH12
2081655	Aria_Haghighi,Dan_Klein	2010	An Entity-Level Approach to Information Extraction.	db/conf/acl/acl2010s.html#HaghighiK10
2081666	Federico_Sangati	2010	A Probabilistic Generative Model for an Intermediate Constituency-Dependency Representation.	db/conf/acl/acl2010r.html#Sangati10
2081670	Narjes_Sharif_Razavian,Stephan_Vogel	2010	Fixed Length Word Suffix for Factored Statistical Machine Translation.	db/conf/acl/acl2010s.html#RazavianV10
2081681	Nancy_Ide,Collin_F._Baker,Christiane_Fellbaum,Rebecca_J._Passonneau	2010	The Manually Annotated Sub-Corpus: A Community Resource for and by the People.	db/conf/acl/acl2010s.html#IdeBFP10
2081682	Bevan_K._Jones,Mark_Johnson,Sharon_Goldwater	2012	Semantic Parsing with Bayesian Tree Transducers.	db/conf/acl/acl2012-1.html#JonesJG12
2081685	Alexander_Volokh,nter_Neumann	2011	Automatic Detection and Correction of Errors in Dependency Treebanks.	db/conf/acl/acl2011s.html#VolokhN11
2081695	Reyyan_Yeniterzi,Kemal_Oflazer	2010	Syntax-to-Morphology Mapping in Factored Phrase-Based Statistical Machine Translation from English to Turkish.	db/conf/acl/acl2010.html#YeniterziO10
2081699	Einat_Minkov,Luke_S._Zettlemoyer	2012	Discriminative Learning for Joint Template Filling.	db/conf/acl/acl2012-1.html#MinkovZ12
2081706	Benjamin_Van_Durme,Ashwin_Lall	2011	Efficient Online Locality Sensitive Hashing via Reservoir Counting.	db/conf/acl/acl2011s.html#DurmeL11
2081711	Guangyou_Zhou,Jun_Zhao_0001,Kang_Liu_0001,Li_Cai	2011	Exploiting Web-Derived Selectional Preference to Improve Statistical Dependency Parsing.	db/conf/acl/acl2011.html#ZhouZLC11
2081712	Igor_Labutov,Hod_Lipson	2012	Humor as Circuits in Semantic Networks.	db/conf/acl/acl2012-2.html#LabutovL12
2081713	Zhonghua_Qu,Yang_Liu_0004	2012	Sentence Dependency Tagging in Online Question Answering Forums.	db/conf/acl/acl2012-1.html#QuL12
2081716	Tetsuo_Kiso,Masashi_Shimbo,Mamoru_Komachi,Yuji_Matsumoto	2011	HITS-based Seed Selection and Stop List Construction for Bootstrapping.	db/conf/acl/acl2011s.html#KisoSKM11
2081723	m,Ryan_T._McDonald	2011	Semi-supervised latent variable models for sentence-level sentiment analysis.	db/conf/acl/acl2011s.html#TackstromM11
2081725	Jochen_L._Leidner,Frank_Schilder	2010	Hunting for the Black Swan: Risk Mining from Text.	db/conf/acl/acl2010d.html#LeidnerS10
2081730	Weiwei_Sun	2011	A Stacked Sub-Word Model for Joint Chinese Word Segmentation and Part-of-Speech Tagging.	db/conf/acl/acl2011.html#Sun11
2081734	Adam_Pauls,Dan_Klein	2010	Hierarchical A* Parsing with Bridge Outside Scores.	db/conf/acl/acl2010s.html#PaulsK10
2081736	Shujie_Liu_0001,Chi-Ho_Li,Mu_Li,Ming_Zhou	2012	Learning Translation Consensus with Structured Label Propagation.	db/conf/acl/acl2012-1.html#LiuLLZ12
2081738	Micha_Elsner,Sharon_Goldwater,Jacob_Eisenstein	2012	Bootstrapping a Unified Model of Lexical and Phonetic Acquisition.	db/conf/acl/acl2012-1.html#ElsnerGE12
2081744	Yang_Feng,Dongdong_Zhang,Mu_Li,Qun_Liu	2012	Hierarchical Chunk-to-String Translation.	db/conf/acl/acl2012-1.html#FengZLL12
2081775	Erhard_W._Hinrichs,Marie_Hinrichs,Thomas_Zastrow	2010	WebLicht: Web-Based LRT Services for German.	db/conf/acl/acl2010d.html#HinrichsHZ10
2081778	Andreas_Maletti,Joost_Engelfriet	2012	Strong Lexicalization of Tree Adjoining Grammars.	db/conf/acl/acl2012-1.html#MalettiE12
2081781	Khe_Chai_Sim	2012	Probabilistic Integration of Partial Lexical Information for Noise Robust Haptic Voice Recognition.	db/conf/acl/acl2012-1.html#Sim12
2081786	Xiao_Chen,Chunyu_Kit	2012	Higher-order Constituent Parsing and Parser Combination.	db/conf/acl/acl2012-2.html#ChenK12
2081790	Hassan_Sajjad,Alexander_M._Fraser,Helmut_Schmid	2011	An Algorithm for Unsupervised Transliteration Mining with an Application to Word Alignment.	db/conf/acl/acl2011.html#SajjadFS11
2081806	Nathanael_Chambers	2012	Labeling Documents with Timestamps: Learning from their Time Expressions.	db/conf/acl/acl2012-1.html#Chambers12
2081812	Sarah_Alkuhlani,Nizar_Habash	2011	A Corpus for Modeling Morpho-Syntactic Agreement in Arabic: Gender, Number and Rationality.	db/conf/acl/acl2011s.html#AlkuhlaniH11
2081818	Shachar_Mirkin,Ido_Dagan,Ã³	2010	Assessing the Role of Discourse References in Entailment Inference.	db/conf/acl/acl2010.html#MirkinDP10
2081820	Christian_Scheible	2010	Sentiment Translation through Lexicon Induction.	db/conf/acl/acl2010r.html#Scheible10
2081828	Bin_Lu,Chenhao_Tan,Claire_Cardie,Benjamin_K._Tsou	2011	Joint Bilingual Sentiment Classification with Unlabeled Parallel Corpora.	db/conf/acl/acl2011.html#LuTCT11
2081843	Daniel_Hewlett,Paul_R._Cohen	2011	Fully Unsupervised Word Segmentation with BVE and MDL.	db/conf/acl/acl2011s.html#HewlettC11
2081847	Manoj_Kumar_Chinnakotla,Karthik_Raman,Pushpak_Bhattacharyya	2010	Multilingual Pseudo-Relevance Feedback: Performance Study of Assisting Languages.	db/conf/acl/acl2010.html#ChinnakotlaRB10
2081848	N,U,L,L	2010	Front Matter.	db/conf/acl/acl2010d.html#X10c
2081853	Gregory_Druck,Bo_Pang	2012	Spice it up? Mining Refinements to Online Instructions from User Generated Content.	db/conf/acl/acl2012-1.html#DruckP12
2081854	Xingyuan_Peng,Dengfeng_Ke,Bo_Xu	2012	Automated Essay Scoring Based on Finite State Transducer: towards ASR Transcription of Oral English Speech.	db/conf/acl/acl2012-1.html#PengKX12
2081859	Raphael_Hoffmann,Congle_Zhang,Xiao_Ling,Luke_S._Zettlemoyer,Daniel_S._Weld	2011	Knowledge-Based Weak Supervision for Information Extraction of Overlapping Relations.	db/conf/acl/acl2011.html#HoffmannZLZW11
2081860	Andreas_Maletti	2011	How to train your multi bottom-up tree transducer.	db/conf/acl/acl2011.html#Maletti11
2081863	Nguyen_Bach,Fei_Huang,Yaser_Al-Onaizan	2011	Goodness: A Method for Measuring Machine Translation Confidence.	db/conf/acl/acl2011.html#BachHA11
2081869	Fabrizio_Morbini,Kenji_Sagae	2011	Joint Identification and Segmentation of Domain-Specific Dialogue Acts for Conversational Dialogue Systems.	db/conf/acl/acl2011s.html#MorbiniS11
2081874	Dmitry_Davidov,Ari_Rappoport	2010	Extraction and Approximation of Numerical Attributes from the Web.	db/conf/acl/acl2010.html#DavidovR10
2081880	Rui_Yan,Mirella_Lapata,Xiaoming_Li	2012	Tweet Recommendation with Graph Co-Ranking.	db/conf/acl/acl2012-1.html#YanLL12
2081891	Tim_Van_de_Cruys,Marianna_Apidianaki	2011	Latent Semantic Word Sense Induction and Disambiguation.	db/conf/acl/acl2011.html#CruysA11
2081901	Yuening_Hu,Jordan_L._Boyd-Graber	2012	Efficient Tree-Based Topic Modeling.	db/conf/acl/acl2012-2.html#HuB12
2081908	Luciana_Benotti,Alexandre_Denis	2011	Prototyping virtual instructors from human-human corpora.	db/conf/acl/acl2011d.html#BenottiD11
2081920	Cristian_Danescu-Niculescu-Mizil,Lillian_Lee	2010	Don't 'Have a Clue'? Unsupervised Co-Learning of Downward-Entailing Operators.	db/conf/acl/acl2010s.html#Danescu-Niculescu-MizilL10
2081921	Yufeng_Chen,Chengqing_Zong,Keh-Yih_Su	2010	On Jointly Recognizing and Aligning Bilingual Named Entities.	db/conf/acl/acl2010.html#ChenZS10
2081923	Matthew_Honnibal,James_R._Curran,Johan_Bos	2010	Rebanking CCGbank for Improved NP Interpretation.	db/conf/acl/acl2010.html#HonnibalCB10
2081925	Takashi_Onishi,Masao_Utiyama,Eiichiro_Sumita	2010	Paraphrase Lattice for Statistical Machine Translation.	db/conf/acl/acl2010s.html#OnishiUS10
2081926	Helen_Yannakoudakis,Ted_Briscoe,Ben_Medlock	2011	A New Dataset and Method for Automatically Grading ESOL Texts.	db/conf/acl/acl2011.html#YannakoudakisBM11
2081938	Hector-Hugo_Franco-Penya	2010	Edit Tree Distance Alignments for Semantic Role Labelling.	db/conf/acl/acl2010r.html#Franco-Penya10
2081948	Hongsuck_Seo,Jonghoon_Lee,Seokhwan_Kim,Kyusong_Lee,Sechun_Kang,Gary_Geunbae_Lee	2012	A Meta Learning Approach to Grammatical Error Correction.	db/conf/acl/acl2012-2.html#SeoLKLKL12
2081949	Joel_Lang,Mirella_Lapata	2011	Unsupervised Semantic Role Induction via Split-Merge Clustering.	db/conf/acl/acl2011.html#LangL11
2081974	Edward_Benson,Aria_Haghighi,Regina_Barzilay	2011	Event Discovery in Social Media Feeds.	db/conf/acl/acl2011.html#BensonHB11
2081976	Duo_Zhang,Qiaozhu_Mei,ChengXiang_Zhai	2010	Cross-Lingual Latent Topic Extraction.	db/conf/acl/acl2010.html#ZhangMZ10
2081983	Paul_Piwek,Svetlana_Stoyanchev	2011	Data-oriented Monologue-to-Dialogue Generation.	db/conf/acl/acl2011s.html#PiwekS11
2081984	Binyang_Li,Lanjun_Zhou,Shi_Feng,Kam-Fai_Wong	2010	A Unified Graph Model for Sentence-Based Opinion Retrieval.	db/conf/acl/acl2010.html#LiZFW10
2081987	Andrea_Gesmundo,Tanja_Samardzic	2012	Lemmatisation as a Tagging Task.	db/conf/acl/acl2012-2.html#GesmundoS12
2081996	ÃŸ,Aoife_Cahill,Jonas_Kuhn	2011	Underspecifying and Predicting Voice for Surface Realisation Ranking.	db/conf/acl/acl2011.html#ZarriessCK11
2081997	David_Vickrey,Oscar_Kipersztok,Daphne_Koller	2010	An Active Learning Approach to Finding Related Terms.	db/conf/acl/acl2010s.html#VickreyKK10
2081998	Joel_Nothman,Matthew_Honnibal,Ben_Hachey,James_R._Curran	2012	Event Linking: Grounding Event Reference in a News Archive.	db/conf/acl/acl2012-2.html#NothmanHHC12
2082004	Hyun-Je_Song,Jeong_Woo_Son,Tae-Gil_Noh,Seong-Bae_Park,Sang-Jo_Lee	2012	A Cost Sensitive Part-of-Speech Tagging: Differentiating Serious Errors from Minor Errors.	db/conf/acl/acl2012-1.html#SongSNPL12
2082008	Ariya_Rastrow,Mark_Dredze,Sanjeev_Khudanpur	2012	Fast Syntactic Analysis for Statistical Language Modeling via Substructure Sharing and Uptraining.	db/conf/acl/acl2012-1.html#RastrowDK12
2082012	Patrick_Pantel,Ariel_Fuxman	2011	Jigs and Lures: Associating Web Queries with Structured Entities.	db/conf/acl/acl2011.html#PantelF11
2082018	Wenliang_Chen,Jun'ichi_Kazama,Kentaro_Torisawa	2010	Bitext Dependency Parsing with Bilingual Subtree Constraints.	db/conf/acl/acl2010.html#ChenKT10
2082020	Peter_Prettenhofer,Benno_Stein	2010	Cross-Language Text Classification Using Structural Correspondence Learning.	db/conf/acl/acl2010.html#PrettenhoferS10
2082024	N,U,L,L	2011	Front Matter.	db/conf/acl/acl2011r.html#X11b
2082027	Boxing_Chen,Roland_Kuhn,Samuel_Larkin	2012	PORT: a Precision-Order-Recall MT Evaluation Metric for Tuning.	db/conf/acl/acl2012-1.html#ChenKL12
2082032	Yee_Seng_Chan,Dan_Roth	2011	Exploiting Syntactico-Semantic Structures for Relation Extraction.	db/conf/acl/acl2011.html#ChanR11
2082034	Inderjeet_Mani,James_Pustejovsky	2012	Qualitative Modeling of Spatial Prepositions and Motion Expressions.	db/conf/acl/acl2012t.html#ManiP12
2082047	Keun-Chan_Park,Yoonjae_Jeong,Sung-Hyon_Myaeng	2010	Detecting Experiences from Weblogs.	db/conf/acl/acl2010.html#ParkJM10
2082048	Marius_Pasca	2011	Web Search Queries as a Corpus.	db/conf/acl/acl2011t.html#Pasca11a
2082059	Sara_Stymne	2011	Pre- and Postprocessing for Statistical Machine Translation into Germanic Languages.	db/conf/acl/acl2011r.html#Stymne11
2082078	Hajime_Morita,Tetsuya_Sakai,Manabu_Okumura	2011	Query Snowball: A Co-occurrence-based Approach to Multi-document Summarization for Question Answering.	db/conf/acl/acl2011s.html#MoritaSO11
2082081	Robert_C._Moore,William_D._Lewis	2010	Intelligent Selection of Language Model Training Data.	db/conf/acl/acl2010s.html#MooreL10
2082087	Ming-Hong_Bai,Yu-Ming_Hsieh,Keh-Jiann_Chen,Jason_S._Chang	2012	DOMCAT: A Bilingual Concordancer for Domain-Specific Computer Assisted Translation.	db/conf/acl/acl2012d.html#BaiHCC12
2082094	Mattia_Tomasoni,Minlie_Huang	2010	Metadata-Aware Measures for Answer Summarization in Community Question Answering.	db/conf/acl/acl2010.html#TomasoniH10
2082099	Weiwei_Sun,Xiaojun_Wan	2012	Reducing Approximation and Estimation Errors for Chinese Lexical Processing with Heterogeneous Annotations.	db/conf/acl/acl2012-1.html#SunW12
2082100	Adam_Pauls,Dan_Klein	2012	Large-Scale Syntactic Language Modeling with Treelets.	db/conf/acl/acl2012-1.html#PaulsK12
2082108	Hui_Zhang,David_Chiang	2012	An Exploration of Forest-to-String Translation: Does Translation Help or Hurt Parsing?	db/conf/acl/acl2012-2.html#ZhangC12
2082119	Eric_H._Huang,Richard_Socher,Christopher_D._Manning,Andrew_Y._Ng	2012	Improving Word Representations via Global Context and Multiple Word Prototypes.	db/conf/acl/acl2012-1.html#HuangSMN12
2082127	Ziheng_Lin,Hwee_Tou_Ng,Min-Yen_Kan	2011	Automatically Evaluating Text Coherence Using Discourse Relations.	db/conf/acl/acl2011.html#LinNK11
2082128	Jungi_Kim,Jinji_Li,Jong-Hyeok_Lee	2010	Evaluating Multilanguage-Comparability of Subjectivity Analysis Systems.	db/conf/acl/acl2010.html#KimLL10
2082129	Elena_Cabrio,Serena_Villata	2012	Combining Textual Entailment and Argumentation Theory for Supporting Online Debates Interactions.	db/conf/acl/acl2012-2.html#CabrioV12
2082135	Ziqi_Wang,Gu_Xu,Hang_Li,Ming_Zhang	2011	A Fast and Accurate Method for Approximate String Search.	db/conf/acl/acl2011.html#WangXLZ11
2082162	my_Kessler,Xavier_Tannier,ge,ronique_Moriceau,Bittar	2012	Finding Salient Dates for Building Thematic Timelines.	db/conf/acl/acl2012-1.html#KesslerTHMB12
2082166	John_DeNero,Dan_Klein	2010	Discriminative Modeling of Extraction Sets for Machine Translation.	db/conf/acl/acl2010.html#DeNeroK10
2082180	David_Chen	2012	Fast Online Lexicon Learning for Grounded Language Acquisition.	db/conf/acl/acl2012-1.html#Chen12
2082181	Costanza_Navarretta,Patrizia_Paggio	2010	Classification of Feedback Expressions in Multimodal Data.	db/conf/acl/acl2010s.html#NavarrettaP10
2082193	Baoxun_Wang,Xiaolong_Wang,Chengjie_Sun,Bingquan_Liu,Lin_Sun	2010	Modeling Semantic Relevance for Question-Answer Pairs in Web Social Communities.	db/conf/acl/acl2010.html#WangWSLS10
2082198	Kirill_Kireyev,Thomas_K._Landauer	2011	Word Maturity: Computational Modeling of Word Knowledge.	db/conf/acl/acl2011.html#KireyevL11
2082201	Mohit_Bansal,Dan_Klein	2011	The Surprising Variance in Shortest-Derivation Parsing.	db/conf/acl/acl2011s.html#BansalK11a
2082208	Seung-Wook_Lee,Dongdong_Zhang,Mu_Li,Ming_Zhou,Hae-Chang_Rim	2012	Translation Model Size Reduction for Hierarchical Phrase-based Statistical Machine Translation.	db/conf/acl/acl2012-2.html#LeeZLZR12
2082211	Nan_Yang,Mu_Li,Dongdong_Zhang,Nenghai_Yu	2012	A Ranking-based Approach to Word Reordering for Statistical Machine Translation.	db/conf/acl/acl2012-1.html#YangLZY12
2082227	Sara_Stymne	2011	Blast: A Tool for Error Analysis of Machine Translation Output.	db/conf/acl/acl2011d.html#Stymne11a
2082228	Awais_Athar	2011	Sentiment Analysis of Citations using Sentence Structure-Based Features.	db/conf/acl/acl2011r.html#Athar11
2082231	Wang_Ling,s,a,Isabel_Trancoso,sa_Coheur	2011	Reordering Modeling using Weighted Alignment Matrices.	db/conf/acl/acl2011s.html#LingLGTC11
2082234	Jeffrey_Heinz	2010	String Extension Learning.	db/conf/acl/acl2010.html#Heinz10
2082269	Tara_McIntosh,Lars_Yencken,James_R._Curran,Timothy_Baldwin	2011	Relation Guided Bootstrapping of Semantic Lexicons.	db/conf/acl/acl2011s.html#McIntoshYCB11
2082278	r,Nicolai_Erbs,Torsten_Zesch,Iryna_Gurevych	2011	Wikulu: An Extensible Architecture for Integrating Natural Language Processing Techniques with Wikis.	db/conf/acl/acl2011d.html#BarEZG11
2082281	Weiwei_Sun,Hans_Uszkoreit	2012	Capturing Paradigmatic and Syntagmatic Lexical Relations: Towards Accurate Chinese Part-of-Speech Tagging.	db/conf/acl/acl2012-1.html#SunU12
2082285	Aarne_Ranta,Krasimir_Angelov,Thomas_Hallgren	2010	Tools for Multilingual Grammar-Based Translation on the Web.	db/conf/acl/acl2010d.html#RantaAH10
2082289	Stefan_Thater,rstenau,Manfred_Pinkal	2010	Contextualizing Semantic Representations Using Syntactically Enriched Vector Models.	db/conf/acl/acl2010.html#ThaterFP10
2082294	Jason_Riesa,Daniel_Marcu	2010	Hierarchical Search for Word Alignment.	db/conf/acl/acl2010.html#RiesaM10
2082295	Ingrid_Falk,Claire_Gardent,Jean-Charles_Lamirel	2012	Classifying French Verbs Using French and English Lexical Resources.	db/conf/acl/acl2012-1.html#FalkGL12
2082300	Dong_Yang,Paul_R._Dixon,Sadaoki_Furui	2010	Jointly Optimizing a Two-Step Conditional Random Field Model for Machine Transliteration and Its Fast Decoding Algorithm.	db/conf/acl/acl2010s.html#YangDF10
2082303	Shuguang_Li,Suresh_Manandhar	2011	Improving Question Recommendation by Exploiting Information Need.	db/conf/acl/acl2011.html#LiM11
2082311	Nina_Dethlefs,huitl	2011	Hierarchical Reinforcement Learning and Hidden Markov Models for Task-Oriented Natural Language Generation.	db/conf/acl/acl2011s.html#DethlefsC11
2082327	Yuri_Lin,Jean-Baptiste_Michel,Erez_Aiden_Lieberman,Jon_Orwant,Will_Brockman,Slav_Petrov	2012	Syntactic Annotations for the Google Books NGram Corpus.	db/conf/acl/acl2012d.html#LinMLOBP12
2082331	Liang_Huang,Kenji_Sagae	2010	Dynamic Programming for Linear-Time Incremental Parsing.	db/conf/acl/acl2010.html#HuangS10
2082349	Derya_Ozkan,Louis-Philippe_Morency	2011	Modeling Wisdom of Crowds Using Latent Mixture of Discriminative Experts.	db/conf/acl/acl2011s.html#OzkanM11
2082353	Hongning_Wang,Duo_Zhang,ChengXiang_Zhai	2011	Structural Topic Model for Latent Topical Structure Analysis.	db/conf/acl/acl2011.html#WangZZ11
2082361	Jackie_Chi_Kit_Cheung,Gerald_Penn	2010	Entity-Based Local Coherence Modelling Using Topological Fields.	db/conf/acl/acl2010.html#CheungP10
2082363	Yang_Liu_0005,Qun_Liu,Ã¼	2011	Adjoining Tree-to-String Translation.	db/conf/acl/acl2011.html#LiuLL11
2082369	Mehdi_Manshadi,James_F._Allen,Mary_D._Swift	2011	A Corpus of Scope-disambiguated English Text.	db/conf/acl/acl2011s.html#ManshadiAS11
2082370	Yun_Huang,Min_Zhang_0005,Chew_Lim_Tan	2011	Nonparametric Bayesian Machine Transliteration with Synchronous Adaptor Grammars.	db/conf/acl/acl2011s.html#HuangZT11
2082373	Micha_Elsner,Eugene_Charniak	2010	The Same-Head Heuristic for Coreference.	db/conf/acl/acl2010s.html#ElsnerC10
2082380	Ivan_Titov,Alexandre_Klementiev	2011	A Bayesian Model for Unsupervised Semantic Parsing.	db/conf/acl/acl2011.html#TitovK11
2082397	Jun_Hatori,Takuya_Matsuzaki,Yusuke_Miyao,Jun'ichi_Tsujii	2012	Incremental Joint Approach to Word Segmentation, POS Tagging, and Dependency Parsing in Chinese.	db/conf/acl/acl2012-1.html#HatoriMMT12
2082408	Patrick_Simianer,Stefan_Riezler,Chris_Dyer	2012	Joint Feature Selection in Distributed Stochastic Learning for Large-Scale Discriminative Training in SMT.	db/conf/acl/acl2012-1.html#SimianerRD12
2082410	Jun_Sun,Min_Zhang_0005,Chew_Lim_Tan	2010	Exploring Syntactic Structural Features for Sub-Tree Alignment Using Bilingual Tree Kernels.	db/conf/acl/acl2010.html#SunZT10
2082423	Nitin_Madnani,Martin_Chodorow,Joel_R._Tetreault,Alla_Rozovskaya	2011	They Can Help: Using Crowdsourcing to Improve the Evaluation of Grammatical Error Detection Systems.	db/conf/acl/acl2011s.html#MadnaniCTR11
2082425	Zhaopeng_Tu,Yifan_He,Jennifer_Foster,Josef_van_Genabith,Qun_Liu,Shouxun_Lin	2012	Identifying High-Impact Sub-Structures for Convolution Kernels in Document-level Sentiment Classification.	db/conf/acl/acl2012-2.html#TuHFGLL12
2082428	Yukino_Baba,Hisami_Suzuki	2012	How Are Spelling Errors Generated and Corrected? A Study of Corrected and Uncorrected Spelling Errors Using Keystroke Logs.	db/conf/acl/acl2012-2.html#BabaS12
2082429	Vahed_Qazvinian,Dragomir_R._Radev	2010	Identifying Non-Explicit Citing Sentences for Citation-Based Summarization.	db/conf/acl/acl2010.html#QazvinianR10
2082430	Qixia_Jiang,Maosong_Sun	2011	Semi-Supervised SimHash for Efficient Document Similarity Search.	db/conf/acl/acl2011.html#JiangS11
2082456	Kosho_Shudo,Akira_Kurahone,Toshifumi_Tanabe	2011	A Comprehensive Dictionary of Multiword Expressions.	db/conf/acl/acl2011.html#ShudoKT11
2082457	Frank_Rudzicz	2010	Correcting Errors in Speech Recognition with Articulatory Dynamics.	db/conf/acl/acl2010.html#Rudzicz10
2082459	lez-Rubio,nez,Francisco_Casacuberta	2010	Balancing User Effort and Translation Error in Interactive Machine Translation via Confidence Measures.	db/conf/acl/acl2010s.html#Gonzalez-RubioOC10
2082466	William_Coster,David_Kauchak	2011	Simple English Wikipedia: A New Text Simplification Task.	db/conf/acl/acl2011s.html#CosterK11
2082468	Hoifung_Poon,Pedro_M._Domingos	2010	Unsupervised Ontology Induction from Text.	db/conf/acl/acl2010.html#PoonD10
2082471	Qiming_Diao,Jing_Jiang,Feida_Zhu,Ee-Peng_Lim	2012	Finding Bursty Topics from Microblogs.	db/conf/acl/acl2012-1.html#DiaoJZL12
2082474	Radu_Soricut,Abdessamad_Echihabi	2010	TrustRank: Inducing Trust in Automatic Translations via Ranking.	db/conf/acl/acl2010.html#SoricutE10
2082480	Jennifer_Williams,Graham_Katz	2012	Extracting and modeling durations for habits and events from Twitter.	db/conf/acl/acl2012-2.html#WilliamsK12
2082481	Alexander_Koller,Stefan_Thater	2010	Computing Weakest Readings.	db/conf/acl/acl2010.html#KollerT10
2082482	Ning_Xi,Guangchao_Tang,Xinyu_Dai,Shujian_Huang,Jiajun_Chen	2012	Enhancing Statistical Machine Translation with Character Alignment.	db/conf/acl/acl2012-2.html#XiTDHC12
2082483	Shoushan_Li,Chu-Ren_Huang,Guodong_Zhou,Sophia_Yat_Mei_Lee	2010	Employing Personal/Impersonal Views in Supervised and Semi-Supervised Sentiment Classification.	db/conf/acl/acl2010.html#LiHZL10
2082484	Yuval_Marton,Nizar_Habash,Owen_Rambow	2011	Improving Arabic Dependency Parsing with Form-based and Functional Morphological Features.	db/conf/acl/acl2011.html#MartonHR11
2082491	Lei_Fang,Minlie_Huang	2012	Fine Granular Aspect Analysis using Latent Structural Models.	db/conf/acl/acl2012-2.html#FangH12
2082501	Max_Whitney,Anoop_Sarkar	2012	Bootstrapping via Graph Propagation.	db/conf/acl/acl2012-1.html#WhitneyS12
2082511	Heather_Friedberg	2011	Turn-Taking Cues in a Human Tutoring Corpus.	db/conf/acl/acl2011r.html#Friedberg11
2082512	Malte_Nuhn,Arne_Mauser,Hermann_Ney	2012	Deciphering Foreign Language by Combining Language Models and Context Vectors.	db/conf/acl/acl2012-1.html#NuhnMN12
2082514	Bo_Pang,Ravi_Kumar_0001	2011	Search in the Lost Sense of ``Query'': Question Formulation in Web Search Queries and its Temporal Changes.	db/conf/acl/acl2011s.html#PangK11
2082520	Andres_Osvaldo_Porta	2010	The Use of Formal Language Models in the Typology of the Morphology of Amerindian Languages.	db/conf/acl/acl2010r.html#Porta10
2082530	Wei-Bin_Liang,Chung-Hsien_Wu,Chia-Ping_Chen	2011	Semantic Information and Derivation Rules for Robust Dialogue Act Detection in a Spoken Dialogue System.	db/conf/acl/acl2011s.html#LiangWC11
2082543	III,Jagadeesh_Jagarlamudi	2011	Domain Adaptation for Machine Translation by Mining Unseen Words.	db/conf/acl/acl2011s.html#DaumeJ11
2082554	Wei-Jie_Huang,Chia-Ru_Chou,Yu-Lin_Tzeng,Chia-Ying_Lee,Chao-Lin_Liu	2012	Applications of GPC Rules and Character Structures in Games for Learning Chinese Characters.	db/conf/acl/acl2012d.html#HuangCTLL12
2082556	Kenneth_E._Hild_II,Umut_Orhan,Deniz_Erdogmus,Brian_Roark,Barry_Oken,Shalini_Purwar,Hooman_Nezamfar,Melanie_Fried-Oken	2011	An ERP-based Brain-Computer Interface for text entry using Rapid Serial Visual Presentation and Language Modeling.	db/conf/acl/acl2011d.html#HildOEROPNF11
2082573	Wanxiang_Che,Valentin_I._Spitkovsky,Ting_Liu	2012	A Comparison of Chinese Parsers for Stanford Dependencies.	db/conf/acl/acl2012-2.html#CheSL12
2082578	Nikolaos_Trogkanis,Charles_Elkan	2010	Conditional Random Fields for Word Hyphenation.	db/conf/acl/acl2010.html#TrogkanisE10
2082579	Wei_Wei,Jon_Atle_Gulla	2010	Sentiment Learning on Product Reviews via Sentiment Ontology Tree.	db/conf/acl/acl2010.html#WeiG10
2082583	Philip_Bramsen,Martha_Escobar-Molano,Ami_Patel,Rafael_Alonso	2011	Extracting Social Power Relationships from Natural Language.	db/conf/acl/acl2011.html#BramsenEPA11
2082585	Michaela_Regneri,Alexander_Koller,Manfred_Pinkal	2010	Learning Script Knowledge with Web Experiments.	db/conf/acl/acl2010.html#RegneriKP10
2082589	Andrea_Gesmundo,Giorgio_Satta,James_Henderson	2012	Heuristic Cube Pruning in Linear Time.	db/conf/acl/acl2012-2.html#GesmundoSH12
2082593	Clinton_Burfoot,Steven_Bird,Timothy_Baldwin	2011	Collective Classification of Congressional Floor-Debate Transcripts.	db/conf/acl/acl2011.html#BurfootBB11
2082596	Roberto_Navigli,Paola_Velardi	2010	Learning Word-Class Lattices for Definition and Hypernym Extraction.	db/conf/acl/acl2010.html#NavigliV10
2082600	Ethan_Selfridge,Peter_A._Heeman	2010	Importance-Driven Turn-Bidding for Spoken Dialogue Systems.	db/conf/acl/acl2010.html#SelfridgeH10
2082603	Wei_Lu,Dan_Roth	2012	Automatic Event Extraction with Structured Preference Modeling.	db/conf/acl/acl2012-1.html#LuR12
2082617	Xiaojiang_Huang,Xiaojun_Wan,Jianguo_Xiao	2011	Comparative News Summarization Using Linear Programming.	db/conf/acl/acl2011s.html#HuangWX11
2082632	Seokhwan_Kim,Gary_Geunbae_Lee	2012	A Graph-based Cross-lingual Projection Approach for Weakly Supervised Relation Extraction.	db/conf/acl/acl2012-2.html#KimL12
2082638	Sravana_Reddy,Kevin_Knight	2011	Unsupervised Discovery of Rhyme Schemes.	db/conf/acl/acl2011s.html#ReddyK11
2082641	Reyyan_Yeniterzi	2011	Exploiting Morphology in Turkish Named Entity Recognition System.	db/conf/acl/acl2011r.html#Yeniterzi11
2082642	Weiwei_Sun	2010	Semantics-Driven Shallow Parsing for Chinese Semantic Role Labeling.	db/conf/acl/acl2010s.html#Sun10
2082645	lez-Rubio,Alfons_Juan,Francisco_Casacuberta	2011	Minimum Bayes-risk System Combination.	db/conf/acl/acl2011.html#Gonzalez-RubioJC11
2082651	Tony_Veale	2011	Creative Language Retrieval: A Robust Hybrid of Information Retrieval and Linguistic Creativity.	db/conf/acl/acl2011.html#Veale11
2082665	Jessica_Villing	2010	Now, Where Was I? Resumption Strategies for an In-Vehicle Dialogue System.	db/conf/acl/acl2010.html#Villing10
2082667	Hiroshi_Yamaguchi,Kumiko_Tanaka-Ishii	2012	Text Segmentation by Language Using Minimum Description Length.	db/conf/acl/acl2012-1.html#YamaguchiT12
2082679	Veselin_Stoyanov,Claire_Cardie,Nathan_Gilbert,Ellen_Riloff,David_Buttler,David_Hysom	2010	Coreference Resolution with Reconcile.	db/conf/acl/acl2010s.html#StoyanovCGRBH10
2082690	Lei_Cui,Dongdong_Zhang,Mu_Li,Ming_Zhou,Tiejun_Zhao	2010	A Joint Rule Selection Model for Hierarchical Phrase-Based Translation.	db/conf/acl/acl2010s.html#CuiZLZZ10
2082698	Ning_Xi,Guangchao_Tang,Boyuan_Li,Yinggong_Zhao	2011	Word Alignment Combination over Multiple Word Segmentation.	db/conf/acl/acl2011r.html#XiTLZ11
2082712	Klaus_Macherey,Andrew_M._Dai,David_Talbot,Ashok_C._Popat,Franz_Josef_Och	2011	Language-independent compound splitting with morphological operations.	db/conf/acl/acl2011.html#MachereyDTPO11
2082720	Simon_Zwarts,Mark_Johnson	2011	The impact of language models and loss functions on repair disfluency detection.	db/conf/acl/acl2011.html#ZwartsJ11
2082721	Guillermo_Garrido,as,Bernardo_Cabaleiro,lvaro_Rodrigo	2012	Temporally Anchored Relation Extraction.	db/conf/acl/acl2012-1.html#GarridoPCR12
2082734	Jason_Naradowsky,Kristina_Toutanova	2011	Unsupervised Bilingual Morpheme Segmentation and Alignment with Context-rich Hidden Semi-Markov Models.	db/conf/acl/acl2011.html#NaradowskyT11
2082738	Kevin_Duh,Akinori_Fujino,Masaaki_Nagata	2011	Is Machine Translation Ripe for Cross-Lingual Sentiment Classification?	db/conf/acl/acl2011s.html#DuhFN11
2082739	Marco_Kuhlmann,guez,Giorgio_Satta	2011	Dynamic Programming Algorithms for Transition-Based Dependency Parsers.	db/conf/acl/acl2011.html#KuhlmannGS11
2082741	Taylor_Berg-Kirkpatrick,Dan_Gillick,Dan_Klein	2011	Jointly Learning to Extract and Compress.	db/conf/acl/acl2011.html#Berg-KirkpatrickGK11
2082746	Majid_Razmara,George_Foster,Baskaran_Sankaran,Anoop_Sarkar	2012	Mixing Multiple Translation Models in Statistical Machine Translation.	db/conf/acl/acl2012-1.html#RazmaraFSS12
2082753	Decong_Li,Sujian_Li,Wenjie_Li,Wei_Wang_0013,Weiguang_Qu	2010	A Semi-Supervised Key Phrase Extraction Approach: Learning from Title Phrases through a Document Semantic Network.	db/conf/acl/acl2010s.html#LiLLWQ10
2082758	Graham_Neubig,Taro_Watanabe,Eiichiro_Sumita,Shinsuke_Mori,Tatsuya_Kawahara	2011	An Unsupervised Model for Joint Phrase Alignment and Extraction.	db/conf/acl/acl2011.html#NeubigWSMK11
2082766	Sebastian_Rudolph,Eugenie_Giesbrecht	2010	Compositional Matrix-Space Models of Language.	db/conf/acl/acl2010.html#RudolphG10
2082769	Katsumasa_Yoshikawa,Ryu_Iida,Tsutomu_Hirao,Manabu_Okumura	2012	Sentence Compression with Semantic Role Constraints.	db/conf/acl/acl2012-2.html#YoshikawaIHO12
2082780	Roberto_Navigli,Simone_Paolo_Ponzetto	2012	Multilingual WSD with Just a Few Lines of Code: the BabelNet API.	db/conf/acl/acl2012d.html#NavigliP12
2082784	Fei_Huang,Alexander_Yates	2010	Open-Domain Semantic Role Labeling by Modeling Word Spans.	db/conf/acl/acl2010.html#HuangY10
2082785	Kareem_Darwish,Ahmed_M._Ali	2012	Arabic Retrieval Revisited: Morphological Hole Filling.	db/conf/acl/acl2012-2.html#DarwishA12
2082798	Fei_Liu_0004,Fuliang_Weng,Xiao_Jiang	2012	A Broad-Coverage Normalization System for Social Media Language.	db/conf/acl/acl2012-1.html#LiuWJ12
2082799	Lonneke_van_der_Plas,Paola_Merlo,James_Henderson	2011	Scaling up Automatic Cross-Lingual Semantic Role Annotation.	db/conf/acl/acl2011s.html#PlasMH11
2082801	Mitesh_M._Khapra,Salil_Joshi_0001,Arindam_Chatterjee,Pushpak_Bhattacharyya	2011	Together We Can: Bilingual Bootstrapping for WSD.	db/conf/acl/acl2011.html#KhapraJCB11
2082803	Xiangyu_Duan,Min_Zhang_0005,Haizhou_Li	2010	Pseudo-Word for Phrase-Based Machine Translation.	db/conf/acl/acl2010.html#DuanZL10
2082811	Clifton_James_McFate,Kenneth_D._Forbus	2011	NULEX: An Open-License Broad Coverage Lexicon.	db/conf/acl/acl2011s.html#McFateF11
2082812	Marina_Litvak,Mark_Last,Menahem_Friedman	2010	A New Approach to Improving Multilingual Summarization Using a Genetic Algorithm.	db/conf/acl/acl2010.html#LitvakLF10
2082818	Shomir_Wilson	2012	The Creation of a Corpus of English Metalanguage.	db/conf/acl/acl2012-1.html#Wilson12
2082826	Preethi_Raghavan,Albert_M._Lai,Eric_Fosler-Lussier	2012	Learning to Temporally Order Medical Events in Clinical Text.	db/conf/acl/acl2012-2.html#RaghavanLF12
2082829	Hong_Sun,Ming_Zhou	2012	Joint Learning of a Dual SMT System for Paraphrase Generation.	db/conf/acl/acl2012-2.html#SunZ12
2082838	Xu_Sun,Jianfeng_Gao,Daniel_Micol,Chris_Quirk	2010	Learning Phrase-Based Spelling Error Models from Clickthrough Data.	db/conf/acl/acl2010.html#SunGMQ10
2082853	Ivan_Vulic,Wim_De_Smet,Marie-Francine_Moens	2011	Identifying Word Translations from Comparable Corpora Using Latent Topic Models.	db/conf/acl/acl2011s.html#VulicSM11
2082856	Kristina_Toutanova,Michel_Galley	2011	Why Initialization Matters for IBM Model 1: Multiple Optima and Non-Strict Convexity.	db/conf/acl/acl2011s.html#ToutanovaG11
2082869	Takashi_Onishi,Masao_Utiyama,Eiichiro_Sumita	2011	Reordering Constraint Based on Document-Level Context.	db/conf/acl/acl2011s.html#OnishiUS11
2082875	Myroslava_O._Dzikovska,Johanna_D._Moore,Natalie_B._Steinhauser,Gwendolyn_E._Campbell	2010	The Impact of Interpretation Problems on Tutorial Dialogue.	db/conf/acl/acl2010s.html#DzikovskaMSC10
2082878	Dominick_Ng,James_R._Curran	2012	Dependency Hashing for n-best CCG Parsing.	db/conf/acl/acl2012-1.html#NgC12
2082886	Oliver_Ferschke,Torsten_Zesch,Iryna_Gurevych	2011	Wikipedia Revision Toolkit: Efficiently Accessing Wikipedia's Edit History.	db/conf/acl/acl2011d.html#FerschkeZG11
2082890	Marcus_Dobrinkat,Tero_Tapiovaara,yrynen,Kimmo_Kettunen	2010	Evaluating Machine Translations Using mNCD.	db/conf/acl/acl2010s.html#DobrinkatTVK10
2082893	Oleksandr_Kolomiyets,Steven_Bethard,Marie-Francine_Moens	2011	Model-Portability Experiments for Textual Temporal Analysis.	db/conf/acl/acl2011s.html#KolomiyetsBM11
2082895	l_de_Kok,Barbara_Plank,Gertjan_van_Noord	2011	Reversible Stochastic Attribute-Value Grammars.	db/conf/acl/acl2011s.html#KokPN11
2082902	Yulan_He,Chenghua_Lin,Harith_Alani	2011	Automatically Extracting Polarity-Bearing Topics for Cross-Domain Sentiment Classification.	db/conf/acl/acl2011.html#HeLA11
2082909	Graham_Neubig,Taro_Watanabe,Shinsuke_Mori,Tatsuya_Kawahara	2012	Machine Translation without Words through Substring Alignment.	db/conf/acl/acl2012-1.html#NeubigWMK12
2082910	Mei-hua_Chen,Shih-Ting_Huang,Hung-ting_Hsieh,Ting-hui_Kao,Jason_S._Chang	2012	FLOW: A First-Language-Oriented Writing Assistant System.	db/conf/acl/acl2012d.html#ChenHHKC12
2082911	Michael_Bendersky,W._Bruce_Croft,David_A._Smith	2011	Joint Annotation of Search Queries.	db/conf/acl/acl2011.html#BenderskyCS11
2082912	Altaf_Rahman,Vincent_Ng	2011	Coreference Resolution with World Knowledge.	db/conf/acl/acl2011.html#RahmanN11
2082924	Ondrej_Bojar,Kamil_Kos,David_Marecek	2010	Tackling Sparse Data Issue in Machine Translation Evaluation.	db/conf/acl/acl2010s.html#BojarKM10
2082934	Chung-Chi_Huang,Mei-hua_Chen,Shih-Ting_Huang,Jason_S._Chang	2011	EdIt: A Broad-Coverage Grammar Checker Using Pattern Grammar.	db/conf/acl/acl2011d.html#HuangCHC11
2082936	Els_Lefever,ronique_Hoste,Martine_De_Cock	2011	ParaSense or How to Use Parallel Corpora for Word Sense Disambiguation.	db/conf/acl/acl2011s.html#LefeverHC11
2082939	Valentin_Jijkoun,Maarten_de_Rijke,Wouter_Weerkamp	2010	Generating Focused Topic-Specific Sentiment Lexicons.	db/conf/acl/acl2010.html#JijkounRW10
2082946	Vanessa_Wei_Feng,Graeme_Hirst	2012	Text-level Discourse Parsing with Rich Linguistic Features.	db/conf/acl/acl2012-1.html#FengH12
2082948	Daniel_Emilio_Beck	2011	Syntax-based Statistical Machine Translation using Tree Automata and Tree Transducers.	db/conf/acl/acl2011r.html#Beck11
2082949	Mikko_Kurimo,William_Byrne,John_Dines,Philip_N._Garner,Matthew_Gibson,Yong_Guan,ki,Reima_Karhila,Simon_King,Hui_Liang,Keiichiro_Oura,Lakshmi_Saheer,Matt_Shannon,Sayaka_Shiota,Jilei_Tian	2010	Personalising Speech-To-Speech Translation in the EMIME Project.	db/conf/acl/acl2010d.html#KurimoBDGGGHKKLOSSST10
2082951	Marius_Pasca	2011	Ranking Class Labels Using Query Sessions.	db/conf/acl/acl2011.html#Pasca11
2082956	Yejin_Choi,Claire_Cardie	2010	Hierarchical Sequential Learning for Extracting Opinions and Their Attributes.	db/conf/acl/acl2010s.html#ChoiC10
2082959	Zornitsa_Kozareva,Eduard_H._Hovy	2010	Learning Arguments and Supertypes of Semantic Relations Using Recursive Patterns.	db/conf/acl/acl2010.html#KozarevaH10
2082966	Ryu_Iida,Syumpei_Kobayashi,Takenobu_Tokunaga	2010	Incorporating Extra-Linguistic Information into Reference Resolution in Collaborative Task Dialogue.	db/conf/acl/acl2010.html#IidaKT10
2082970	Linlin_Li_0001,Benjamin_Roth,Caroline_Sporleder	2010	Topic Models for Word Sense Disambiguation and Token-Based Idiom Detection.	db/conf/acl/acl2010.html#LiRS10
2082972	Yotaro_Watanabe,Masayuki_Asahara,Yuji_Matsumoto	2010	A Structured Model for Joint Learning of Argument Roles and Predicate Senses.	db/conf/acl/acl2010s.html#WatanabeAM10
2082975	Wenting_Wang,Jian_Su,Chew_Lim_Tan	2010	Kernel Based Discourse Relation Recognition with Temporal Ordering Information.	db/conf/acl/acl2010.html#WangST10
2121178	Sami_Moisio,n,Pasi_Korkealaakso,Antonio_Morales	2012	Simulation of tactile sensors using soft contacts for robot grasping applications.	db/conf/icra/icra2012.html#MoisioLKM12
2121179	Barzin_Doroodgar,Maurizio_Ficocelli,Babak_Mobedi,Goldie_Nejat	2010	The search for survivors: Cooperative human-robot interaction in search and rescue environments using semi-autonomous robots.	db/conf/icra/icra2010.html#DoroodgarFMN10
2121190	Mauro_Franceschelli,Andrea_Gasparri,Alessandro_Giua,Giovanni_Ulivi	2010	Decentralized stabilization of heterogeneous linear multi-agent systems.	db/conf/icra/icra2010.html#FranceschelliGGU10
2121205	Juan_Sorribes,Mario_Prats,Antonio_Morales	2010	Visual tracking of a jaw gripper based on articulated 3D models for grasping.	db/conf/icra/icra2010.html#SorribesPM10
2121222	Masanao_Koeda,Yumi_Uda,Seiji_Sugiyama,Tsuneo_Yoshikawa	2011	Shuffle turn and translation of humanoid robots.	db/conf/icra/icra2011.html#KoedaUSY11
2121224	Ben_Kehoe,Dmitry_Berenson,Ken_Goldberg	2012	Toward cloud-based grasping with uncertainty in shape: Estimating lower bounds on achieving force closure with zero-slip push grasps.	db/conf/icra/icra2012.html#KehoeBG12
2121236	Patrik_Axelsson,Rickard_Karlsson,f	2012	Tool position estimation of a flexible industrial robot using recursive bayesian methods.	db/conf/icra/icra2012.html#AxelssonKN12
2121253	Xuping_Zhang,Clement_Leung,Zhe_Lu,Navid_Esfandiari,Robert_F._Casper,Yu_Sun_0001	2012	Controlled positioning of biological cells inside a micropipette.	db/conf/icra/icra2012.html#ZhangLLECS12
2121271	Mike_Phillips,Maxim_Likhachev	2011	SIPP: Safe interval path planning for dynamic environments.	db/conf/icra/icra2011.html#PhillipsL11
2121282	Xiaolin_Wang,Xiao_Yan,Shuxun_Chen,Dong_Sun	2012	Automated parallel cell isolation and deposition using microwell array and optical tweezers.	db/conf/icra/icra2012.html#WangYCS12
2121288	Shaojie_Shen,Nathan_Michael,Vijay_Kumar_0001	2011	Autonomous multi-floor indoor navigation with a computationally constrained MAV.	db/conf/icra/icra2011.html#ShenMK11
2121289	Stephan_Gspandl,Siegfried_Podesser,Michael_Reip,Gerald_Steinbauer,Mate_Wolfram	2012	A dependable perception-decision-execution cycle for autonomous robots.	db/conf/icra/icra2012.html#GspandlPRSW12
2121291	Masaya_Hagiwara,Tomohiro_Kawahara,Lin_Feng,Yoko_Yamanishi,Fumihito_Arai	2011	On-chip enucleation of oocyte by magnetically driven microtools with ultrasonic vibration.	db/conf/icra/icra2011.html#HagiwaraKFYA11
2121294	Arne_Rost,Alexander_Verl	2010	The QuadHelix-Drive - An improved rope actuator for robotic applications.	db/conf/icra/icra2010.html#RostV10
2121296	Zhongkui_Wang,Shinichi_Hirai	2011	Green strain based FE modeling of rheological objects for handling large deformation and rotation.	db/conf/icra/icra2011.html#WangH11
2121297	Graham_G._Ryland,Harry_H._Cheng	2010	elligent reconfigurable mobile robot.	db/conf/icra/icra2010.html#RylandC10a
2121305	Ida_Bagus_Kerthyayana_Manuaba,Ken_Taylor,Tom_Gedeon	2011	Comparison between two mixed reality environments as a teleoperation interface.	db/conf/icra/icra2011.html#ManuabaTG11
2121306	Ozer_Unluhisarcikli,Brian_Weinberg,Mark_Sivak,Anat_Mirelman,Paolo_Bonato,Constantinos_Mavroidis	2010	A robotic hand rehabilitation system with interactive gaming using novel Electro-Rheological Fluid based actuators.	db/conf/icra/icra2010.html#UnluhisarcikliWSMBM10
2121310	Hisataka_Maruyama,Ryo_Iitsuka,Kazuhisa_Onda,Fumihito_Arai	2010	Massive parallel assembly of microbeads for fabrication of microtools having spherical structure and powerful laser manipulation.	db/conf/icra/icra2010.html#MaruyamaIOA10
2121317	Yun_Jiang,Stephen_Moseson,Ashutosh_Saxena	2011	Efficient grasping from RGBD images: Learning using a new rectangle representation.	db/conf/icra/icra2011.html#JiangMS11
2121331	Michael_Milford,Gordon_Fraser_Wyeth	2012	SeqSLAM: Visual route-based navigation for sunny summer days and stormy winter nights.	db/conf/icra/icra2012.html#MilfordW12
2121338	Juan_David_Adarve,Mathias_Perrollaz,Alexandros_Makris,Christian_Laugier	2012	Computing occupancy grids from multiple sensors using linear opinion pools.	db/conf/icra/icra2012.html#AdarvePML12
2121352	Monica_Anderson,Jason_Bowman,Paul_Kilgo	2012	RDIS: Generalizing domain concepts to specify device to framework mappings.	db/conf/icra/icra2012.html#AndersonBK12
2121361	Dingguo_Zhang,Xinpu_Chen,Shunchong_Li,Pinghua_Hu,Xiangyang_Zhu	2011	EMG controlled multifunctional prosthetic hand: Preliminary clinical study and experimental demonstration.	db/conf/icra/icra2011.html#ZhangCLHZ11
2121364	Amir_Sadrpour,Jionghua_(Judy)_Jin,A._Galip_Ulsoy	2012	Mission energy prediction for unmanned ground vehicles.	db/conf/icra/icra2012.html#SadrpourJU12
2121375	Michele_Focchi,Emanuele_Guglielmino,Claudio_Semini,Thiago_Boaventura_Cunha,Yousheng_Yang,Darwin_G._Caldwell	2010	Control of a hydraulically-actuated quadruped robot leg.	db/conf/icra/icra2010.html#FocchiGSCYC10
2121380	Andrew_I._Comport,Robert_E._Mahony,Fabien_Spindler	2011	A visual servoing model for generalised cameras: Case study of non-overlapping cameras.	db/conf/icra/icra2011.html#ComportMS11
2121381	Tao_Li,Olivier_Kermorgant,Alexandre_Krupa	2012	Maintaining visibility constraints during tele-echography with ultrasound visual servoing.	db/conf/icra/icra2012.html#LiKK12
2121383	Toshiharu_Mukai,Shinya_Hirano,Morio_Yoshida,Hiromichi_Nakashima,Shijie_Guo,Yoshikazu_Hayakawa	2011	Tactile-based motion adjustment for the nursing-care assistant robot RIBA.	db/conf/icra/icra2011.html#MukaiHYNGH11
2121384	Zhenqiang_Mi,Yang_Yang_0004,Guangjun_Liu	2011	Coverage enhancement of mobile multi-agent networks while preserving global connectivity.	db/conf/icra/icra2011.html#MiYL11a
2121399	Oliver_Eiberger,Sami_Haddadin,Michael_Weis,ffer,Gerd_Hirzinger	2010	On joint design with intrinsic variable compliance: derivation of the DLR QA-Joint.	db/conf/icra/icra2010.html#EibergerHWAH10
2121400	Shumei_Yu,Shugen_Ma,Bin_Li,Yuechao_Wang	2011	An amphibious snake-like robot with terrestrial and aquatic gaits.	db/conf/icra/icra2011.html#YuMLW11
2121402	Geoffrey_A._Hollinger,Srinivas_Yerramalli,Sanjiv_Singh,Urbashi_Mitra,Gaurav_S._Sukhatme	2011	Distributed coordination and data fusion for underwater search.	db/conf/icra/icra2011.html#HollingerYSMS11
2121409	Steffen_W._Ruehl,Andreas_Hermann,Zhixing_Xue,Thilo_Kerscher,diger_Dillmann	2011	Graspability: A description of work surfaces for planning of robot manipulation sequences.	db/conf/icra/icra2011.html#RuehlHXKD11
2121417	Jean-Christophe_Zufferey,Antoine_Beyeler,Dario_Floreano	2010	Autonomous flight at low altitude with vision-based collision avoidance and GPS-based path following.	db/conf/icra/icra2010.html#ZuffereyBF10
2121422	Slawomir_Grzonka,Frederic_Dijoux,Andreas_Karwath,Wolfram_Burgard	2010	Mapping indoor environments based on human activity.	db/conf/icra/icra2010.html#GrzonkaDKB10
2121423	Genta_Kondo,Ryu_Kato,Hiroshi_Yokoi,Tamio_Arai	2010	Classification of individual finger motions hybridizing electromyogram in transient and converged states.	db/conf/icra/icra2010.html#KondoKYA10
2121429	Takeshi_Takaki,Youhei_Omasa,Idaku_Ishii,Tomohiro_Kawahara,Masazumi_Okajima	2010	fringe applied to endoscopic surgical instruments.	db/conf/icra/icra2010.html#TakakiOIKO10
2121432	Oscar_G._Grasa,Javier_Civera,J._M._M._Montiel	2011	EKF monocular SLAM with relocalization for laparoscopic sequences.	db/conf/icra/icra2011.html#GrasaCM11
2121441	Daniel_Althoff,Dirk_Wollherr,Martin_Buss	2011	Safety assessment of trajectories for navigation in uncertain and dynamic environments.	db/conf/icra/icra2011.html#AlthoffWB11
2121450	Buddy_Michini,Josh_Redding,N._Kemal_Ure,Mark_Cutler,Jonathan_P._How	2011	Design and flight testing of an autonomous variable-pitch quadrotor.	db/conf/icra/icra2011.html#MichiniRUCH11
2121452	Baoxing_Qin,Z._J._Chong,Tirthankar_Bandyopadhyay,Marcelo_H._Ang,Emilio_Frazzoli,Daniela_Rus	2012	Curb-intersection feature based Monte Carlo Localization on urban roads.	db/conf/icra/icra2012.html#QinCBAFR12
2121453	Benjamin_Johnson,Frank_Havlak,Mark_E._Campbell,Hadas_Kress-Gazit	2012	Execution and analysis of high-level tasks with dynamic obstacle anticipation.	db/conf/icra/icra2012.html#JohnsonHCK12
2121457	Maciej_Pietrusinski,Iahn_Cajigas,Mary_Goldsmith,Paolo_Bonato,Constantinos_Mavroidis	2010	Robotically generated force fields for stroke patient pelvic obliquity gait rehabilitation.	db/conf/icra/icra2010.html#PietrusinskiCGBM10
2121470	Djordje_Mitrovic,Sho_Nagashima,Stefan_Klanke,Takamitsu_Matsubara,Sethu_Vijayakumar	2010	Optimal Feedback Control for anthropomorphic manipulators.	db/conf/icra/icra2010.html#MitrovicNKMV10
2121474	Uwe_Mettin,Anton_S._Shiriaev,tz,Dirk_Wollherr	2010	Ball dribbling with an underactuated continuous-time control phase.	db/conf/icra/icra2010.html#MettinSBW10
2121476	ler,Jens_Behley,Volker_Steinhage,Dirk_Schulz,Armin_B._Cremers	2011	Person tracking in three-dimensional laser range data with explicit occlusion adaption.	db/conf/icra/icra2011.html#ScholerBSSC11
2121477	Jie_Zhao,Xiaoguang_Wu,Xizhe_Zang,Yanhe_Zhu,Lei_Zhu	2011	The analysis on period doubling gait and chaotic gait of the compass-gait biped model.	db/conf/icra/icra2011.html#ZhaoWZZZ11
2121479	T._Yamaguchi,Jun_Ota,Mihoko_Otake	2012	A system that assists group conversation of older adults by evaluating speech duration and facial expression of each participant during conversation.	db/conf/icra/icra2012.html#YamaguchiOO12
2121486	Ian_A._Baldwin,Paul_Newman_0001	2012	Road vehicle localization with 2D push-broom LIDAR and 3D priors.	db/conf/icra/icra2012.html#BaldwinN12
2121489	Ioannis_Filippidis,Kostas_J._Kyriakopoulos	2012	Navigation Functions for everywhere partially sufficiently curved worlds.	db/conf/icra/icra2012.html#FilippidisK12
2121498	Henry_Carrillo,Ian_D._Reid_0001,A._Castellanos	2012	On the comparison of uncertainty criteria for active SLAM.	db/conf/icra/icra2012.html#CarrilloRC12
2121507	Kouji_Murakami,Kazuya_Matsuo,Tsutomu_Hasegawa,Ryo_Kurazume	2012	Position tracking and recognition of everyday objects by using sensors embedded in an environment and mounted on mobile robots.	db/conf/icra/icra2012.html#MurakamiMHK12
2121525	Simone_Frintrop,Armin_B._Cremers	2010	Visual landmark generation and redetection with a single feature per frame.	db/conf/icra/icra2010.html#FrintropC10
2121530	David_Zarrouk,Inna_Sharf,Moshe_Shoham	2012	Experimental validation of locomotion efficiency of worm-like robots and contact compliance.	db/conf/icra/icra2012.html#ZarroukSS12
2121533	Klaus_H._Strobl,Elmar_Mair,Gerd_Hirzinger	2011	Image-based pose estimation for 3-D modeling in rapid, hand-held motion.	db/conf/icra/icra2011.html#StroblMH11
2121539	Tomoaki_Nakamura,Takayuki_Nagai,Naoto_Iwahashi	2011	Bag of multimodal LDA models for concept formation.	db/conf/icra/icra2011.html#NakamuraNI11
2121553	Apoorva_Shende,Matthew_J._Bays,Daniel_J._Stilwell	2011	Toward coordinated sensor motion for classification: An example of intrusion detection using Bayes risk.	db/conf/icra/icra2011.html#ShendeBS11
2121555	Fumihiko_Asano	2011	Stability analysis of passive compass gait using linearized model.	db/conf/icra/icra2011.html#Asano11
2121563	Markus_Hehn,Raffaello_D'Andrea	2011	A flying inverted pendulum.	db/conf/icra/icra2011.html#HehnD11
2121583	Masaya_Hagiwara,Tomohiro_Kawahara,Lin_Feng,Yoko_Yamanishi,Fumihito_Arai	2011	High performance magnetically driven microtools with ultrasonic vibration for biomedical innovations.	db/conf/icra/icra2011.html#HagiwaraKFYA11a
2121594	oz,Alicia_Casals	2012	Dynamic scaling interface for assisted teleoperation.	db/conf/icra/icra2012.html#MunozC12
2121600	Yotaro_Mori,Hideyuki_Tsukagoshi,Ato_Kitagawa	2010	Flexible sliding actuator using a flat tube and its application to the rescue operation.	db/conf/icra/icra2010.html#MoriTK10
2121619	Jorge_Solis,Klaus_Petersen,Masaki_Takeuchi,Takafumi_Kusano,Shimpei_Ishikawa,Atsuo_Takanishi,Kunimatsu_Hashimoto	2011	Improvement of the oral cavity and finger mechanisms and implementation of a Pressure-Pitch Control System for the Waseda Saxophonist Robot.	db/conf/icra/icra2011.html#SolisPTKITH11
2121626	Lyndon_B._Bridgwater,Chris_Ihrke,Myron_A._Diftler,Muhammad_E._Abdallah,Nicolaus_A._Radford,J._M._Rogers,S._Yayathi,R._Scott_Askew,D._Marty_Linn	2012	The Robonaut 2 hand - designed to do work with tools.	db/conf/icra/icra2012.html#BridgwaterIDARRYAL12
2121629	Nikolaus_Vahrenkamp,Martin_Do,Tamim_Asfour,diger_Dillmann	2010	Integrated Grasp and motion planning.	db/conf/icra/icra2010.html#VahrenkampDAD10
2121633	Han-Pang_Huang,Po-Wei_Wu	2012	Generalized spatial behavior cognition model and its applications for intelligent robots.	db/conf/icra/icra2012.html#HuangW12
2121648	Carlos_I._Aldana,Emmanuel_Nuno,ez	2012	Bilateral teleoperation of cooperative manipulators.	db/conf/icra/icra2012.html#AldanaNB12
2121654	Jory_Denny,Nancy_M._Amato	2012	The Toggle Local Planner for sampling-based motion planning.	db/conf/icra/icra2012.html#DennyA12
2121659	Roland_Lenain,Benoit_Thuilot,Oliver_Hach,Philippe_Martinet	2011	High-speed mobile robot control in off-road conditions: A multi-model based adaptive approach.	db/conf/icra/icra2011.html#LenainTHM11
2121665	Kentaro_Takemura,Ato_Araki,Junichi_Ido,Yoshio_Matsumoto,Jun_Takamatsu,Tsukasa_Ogasawara	2010	Generating individual maps from Universal map for heterogeneous mobile robots.	db/conf/icra/icra2010.html#TakemuraAIMTO10
2121670	Anja_Marx,Marie-Aude_Vitrani,Benoit_Herman,Razvan_Iordache,Serge_Muller,Guillaume_Morel	2011	Synergic comanipulation despite underactuated robot.	db/conf/icra/icra2011.html#MarxVHIMM11
2121679	Jason_Pile,Mei_Yi_Cheung,Jian_Zhang,Nabil_Simaan	2011	Algorithms and design considerations for robot assisted insertion of Perimodiolar Electrode Arrays.	db/conf/icra/icra2011.html#PileCZS11
2121707	Yanbo_Li,Kostas_E._Bekris	2011	Learning approximate cost-to-go metrics to improve sampling-based motion planning.	db/conf/icra/icra2011.html#LiB11
2121710	Matteo_Laffranchi,Nikolaos_G._Tsagarakis,Darwin_G._Caldwell	2010	A variable physical damping actuator (VPDA) for compliant robotic joints.	db/conf/icra/icra2010.html#LaffranchiTC10
2121731	Christopher_R._Baker,John_M._Dolan,Shige_Wang,Bakhtiar_Litkouhi	2011	Toward adaptation and reuse of advanced robotic software.	db/conf/icra/icra2011.html#BakerDWL11
2121743	Dongheui_Lee,Christian_Ott,Yoshihiko_Nakamura,Gerd_Hirzinger	2011	Physical human robot interaction in imitation learning.	db/conf/icra/icra2011.html#LeeONH11
2121755	Alican_Demir,Edward_W._Samson,Noah_J._Cowan	2010	A tunable physical model of arthropod antennae.	db/conf/icra/icra2010.html#DemirSC10
2121757	Emre_Ugur,Erol_Sahin,ztop	2011	Unsupervised learning of object affordances for planning in a mobile manipulation platform.	db/conf/icra/icra2011.html#UgurSO11
2121768	Johan_Thunberg,gren	2010	An iterative Mixed Integer Linear Programming Approach to pursuit evasion problems in polygonal environments.	db/conf/icra/icra2010.html#ThunbergO10
2121786	Olivier_Kermorgant,David_Folio,ois_Chaumette	2010	A new sensor self-calibration framework from velocity measurements.	db/conf/icra/icra2010.html#KermorgantFC10
2121795	Lantao_Liu,Dylan_A._Shell	2012	Tunable routing solutions for multi-robot navigation via the assignment problem: A 3D representation of the matching graph.	db/conf/icra/icra2012.html#LiuS12a
2121796	Christopher_Mei,Eric_Sommerlade,Gabe_Sibley,Paul_M._Newman,Ian_D._Reid_0001	2011	Hidden view synthesis using real-time visual SLAM for simplifying video surveillance analysis.	db/conf/icra/icra2011.html#MeiSSNR11
2121798	Juan_Pablo_Gonzalez,Andrew_Dornbush,Maxim_Likhachev	2012	Using state dominance for path planning in dynamic environments with moving obstacles.	db/conf/icra/icra2012.html#GonzalezDL12
2121799	Paolo_Robuffo_Giordano,Carlo_Masone,Joachim_Tesch,Martin_Breidt,Lorenzo_Pollini,lthoff	2010	A novel framework for closed-loop robotic motion simulation - part II: Motion cueing design and experimental validation.	db/conf/icra/icra2010.html#GiordanoMTBPB10a
2121803	Yuxin_Su,Chunhong_Zheng	2010	A simple nonlinear PID control for global finite-time regulation of robot manipulators without velocity measurements.	db/conf/icra/icra2010.html#SuZ10
2121806	Esra_Erdem,Kadir_Haspalamutgil,Can_Palaz,Volkan_Patoglu,Tansel_Uras	2011	Combining high-level causal reasoning with low-level geometric reasoning and motion planning for robotic manipulation.	db/conf/icra/icra2011.html#ErdemHPPU11
2121807	Thomas_Ihme,Kai_Wetzelsberger,Mario_Speckert,rn_Fischer	2011	Real-time image processing based on a task-pair scheduling concept.	db/conf/icra/icra2011.html#IhmeWSF11
2121817	Daniel_Watman,Hideaki_Murayama	2011	Design of a miniature, multi-directional optical flow sensor for Micro Aerial Vehicles.	db/conf/icra/icra2011.html#WatmanM11
2121823	Juan_Liu,Ying_Zhang	2011	Real-time outline mapping for mobile blind robots.	db/conf/icra/icra2011.html#LiuZ11
2121825	Andreas_Breitenmoser,Mac_Schwager,Jean-Claude_Metzger,Roland_Siegwart,Daniela_Rus	2010	Voronoi coverage of non-convex environments with a group of networked robots.	db/conf/icra/icra2010.html#BreitenmoserSMSR10
2121835	Vincenzo_Lippiello,Bruno_Siciliano,Luigi_Villani	2012	A grasping force optimization algorithm for dexterous robotic hands.	db/conf/icra/icra2012.html#LippielloSV12
2121838	Daniel_P._Cunningham,H._Harry_Asada	2010	Continuous path tracing by a cable-suspended, under-actuated robot: The Winch-Bot.	db/conf/icra/icra2010.html#CunninghamA10
2121846	Ross_L._Hatton,Howie_Choset	2010	Sidewinding on slopes.	db/conf/icra/icra2010.html#HattonC10
2121849	Vitor_Guizilini,Fabio_Ramos	2011	Visual odometry learning for unmanned aerial vehicles.	db/conf/icra/icra2011.html#GuiziliniR11
2121864	L._Alonso_Sanchez,M._Q._Le,Chao_Liu_0003,Nabil_Zemiti,Philippe_Poignet	2012	The impact of interaction model on stability and transparency in bilateral teleoperation for medical applications.	db/conf/icra/icra2012.html#SanchezLLZP12
2121869	Ji-Chul_Ryu,Fabio_Ruggiero,Kevin_M._Lynch	2012	Control of nonprehensile rolling manipulation: Balancing a disk on a disk.	db/conf/icra/icra2012.html#RyuRL12
2121870	Shrihari_Vasudevan,Fabio_Ramos,Eric_Nettleton,Hugh_F._Durrant-Whyte	2011	Non-stationary dependent Gaussian processes for data fusion in large-scale terrain modeling.	db/conf/icra/icra2011.html#VasudevanRND11
2121875	Nicolae_Lobontiu,Matt_Cullin,Ephrahim_Garcia,Jennifer_McFerran_Brock,Muhammad_Ali	2012	Compliances of symmetric flexure hinges for planar compliant mechanisms.	db/conf/icra/icra2012.html#LobontiuCGBA12
2121876	Wataru_Takano,Yoshihiko_Nakamura	2010	Associative processes between behavioral symbols and a large scale language model.	db/conf/icra/icra2010.html#TakanoN10
2121888	Hongnian_Yu,M._Nazmul_Huda,Samuel_Oliver_Wane	2011	A novel acceleration profile for the motion control of capsubots.	db/conf/icra/icra2011.html#YuHW11
2121890	Julian_Mason,Susanna_Ricco,Ronald_Parr	2011	Textured occupancy grids for monocular localization without features.	db/conf/icra/icra2011.html#MasonRP11
2121906	Yuki_Hirose,Kenjiro_Tadakuma,Mitsuru_Higashimori,Tatsuo_Arai,Makoto_Kaneko,Ryo_Iitsuka,Yoko_Yamanishi,Fumihito_Arai	2010	A new stiffness evaluation toward high speed cell sorter.	db/conf/icra/icra2010.html#HiroseTHAKIYA10
2121908	Pedro_F._Santana,Nelson_Alves,s_Correia,Barata	2010	A saliency-based approach to boost trail detection.	db/conf/icra/icra2010.html#SantanaACB10
2121916	Ravi_Balasubramanian,Ling_Xu,Peter_D._Brook,Joshua_R._Smith,Yoky_Matsuoka	2010	Human-guided grasp measures improve grasp robustness on physical robot.	db/conf/icra/icra2010.html#BalasubramanianXBSM10
2121917	Satoshi_Suzuki	2011	Low accuracy sensor-based navigation and fully autonomous guidance control of small electric helicopter.	db/conf/icra/icra2011.html#Suzuki11
2121919	Aaron_Parness,Matthew_Frost,Nitish_Thatte,Jonathan_P._King	2012	Gravity-independent mobility and drilling on natural rock using microspines.	db/conf/icra/icra2012.html#ParnessFTK12
2121923	Kwang_Ho_An,Myung_Jin_Chung	2010	Robust unified stereo-based 3D head tracking and its application to face recognition.	db/conf/icra/icra2010.html#AnC10
2121924	In-Won_Park,Young-Dae_Hong,Bum-Joo_Lee,Jong-Hwan_Kim	2012	Generating optimal trajectory of humanoid arm that minimizes torque variation using differential dynamic programming.	db/conf/icra/icra2012.html#ParkHLK12
2121932	Masafumi_Okada,Yushi_Takeda	2012	Optimal design of nonlinear profile of gear ratio using non-circular gear for jumping robot.	db/conf/icra/icra2012.html#OkadaT12
2121947	M._Anthony_Lewis,Matthew_R._Bunting,Behnam_Salemi,Heiko_Hoffmann	2011	Toward Ultra High Speed Locomotors: Design and test of a cheetah robot hind limb.	db/conf/icra/icra2011.html#LewisBSH11
2121948	Redwan_Dahmouche,Nicolas_Andreff,Youcef_Mezouar,Philippe_Martinet	2010	Efficient high-speed vision-based computed torque control of the orthoglide parallel robot.	db/conf/icra/icra2010.html#DahmoucheAMM10
2121950	Erion_Plaku,Gregory_D._Hager	2010	Sampling-Based Motion and Symbolic Action Planning with geometric and differential constraints.	db/conf/icra/icra2010.html#PlakuH10
2121971	Olivier_Koch,Matthew_R._Walter,Albert_S._Huang,Seth_J._Teller	2010	Ground robot navigation using uncalibrated cameras.	db/conf/icra/icra2010.html#KochWHT10
2121989	Michel_Franken,Rob_Reilink,Sarthak_Misra,Stefano_Stramigioli	2010	Multi-dimensional passive sampled Port-Hamiltonian systems.	db/conf/icra/icra2010.html#FrankenRMS10
2121996	Thomas_W._Secord,Anirban_Mazumdar,H._Harry_Asada	2010	A multi-cell piezoelectric device for tunable resonance actuation and energy harvesting.	db/conf/icra/icra2010.html#SecordMA10
2121998	Timothy_H._Chung,Stefano_Carpin	2011	Multiscale search using probabilistic quadtrees.	db/conf/icra/icra2011.html#ChungC11
2122003	Tobias_Kunz,Peter_Kingston,Mike_Stilman,Magnus_Egerstedt	2011	Dynamic chess: Strategic planning for robot motion.	db/conf/icra/icra2011.html#KunzKSE11
2122007	Ismet_Handzic,Erin_Vasudevan,Kyle_B._Reed	2012	Developing a Gait Enhancing Mobile Shoe to alter over-ground walking coordination.	db/conf/icra/icra2012.html#HandzicVR12
2122038	Nicola_Basilico,Stefano_Carpin	2012	Online patrolling using hierarchical spatial representations.	db/conf/icra/icra2012.html#BasilicoC12
2122061	Ronghua_Luo,Songhao_Piao,Huaqing_Min	2011	Simultaneous place and object recognition with mobile robot using pose encoded contextual information.	db/conf/icra/icra2011.html#LuoPM11
2122067	Nikolay_Stefanov,Angelika_Peer,Martin_Buss	2010	Online intention recognition for computer-assisted teleoperation.	db/conf/icra/icra2010.html#StefanovPB10
2122073	Emmanuel_B._Vander_Poorten,Eric_Demeester,Eli_Reekmans,Johan_Philips,ntemann,Joris_De_Schutter	2012	Powered wheelchair navigation assistance through kinematically correct environmental haptic feedback.	db/conf/icra/icra2012.html#PoortenDRPHS12
2122074	Ã©,Karl_Henrik_Johansson	2010	Adaptive exploitation of multipath fading for mobile sensors.	db/conf/icra/icra2010.html#LindheJ10
2122081	Gian_Diego_Tipaldi,Kai_Oliver_Arras	2010	FLIRT - Interest regions for 2D range data.	db/conf/icra/icra2010.html#TipaldiA10
2122094	Liang_Ding,Keiji_Nagatani,Keisuke_Sato,Andres_E._Mora_Vargas,Kazuya_Yoshida,Haibo_Gao,Zongquan_Deng	2010	Terramechanics-based high-fidelity dynamics simulation for wheeled mobile robot on deformable rough terrain.	db/conf/icra/icra2010.html#DingNSVYGD10
2122106	Emmanuel_Nuno,Ioannis_Sarras,ez,Michel_Kinnaert	2012	A proportional plus damping injection controller for teleoperators with joint flexibility and time-delays.	db/conf/icra/icra2012.html#NunoSBK12
2122107	Quanzhu_Chen,Weihai_Chen,Rong_Liu,Jianbin_Zhang	2011	Error analysis and flexibility compensation of a cable-driven humanoid-arm manipulator.	db/conf/icra/icra2011.html#ChenCLZ11
2122123	Hao_Li,Yuru_Zhang,Jian_S._Dai	2011	Design optimization of parallel manipulators with required pose resolution.	db/conf/icra/icra2011.html#LiZD11
2122126	Hideyuki_Tsukagoshi,Yotaro_Mori,Ato_Kitagawa	2012	Fast accessible rescue device by using a flexible sliding actuator.	db/conf/icra/icra2012.html#TsukagoshiMK12
2122132	Marc_Ziegler,Matej_Hoffmann,Juan_Pablo_Carbajal,Rolf_Pfeifer	2011	Varying body stiffness for aquatic locomotion.	db/conf/icra/icra2011.html#ZieglerHCP11
2122134	Ali-akbar_Agha-mohammadi,Suman_Chakravorty,Nancy_M._Amato	2012	On the probabilistic completeness of the sampling-based feedback motion planners in belief space.	db/conf/icra/icra2012.html#Agha-mohammadiCA12
2122142	rle,Kathrin_Eva_Peyer,Bradley_Kratochvil,Bradley_J._Nelson	2012	Holonomic 5-DOF magnetic control of 1D nanostructures.	db/conf/icra/icra2012.html#SchurlePKN12
2122143	Cong-wei_Zhong,Ji_Xiang,Wei_Wei,Yuan-hui_Zhang	2011	A lower dimensional task function method for point-to-point control of non-redundant manipulators.	db/conf/icra/icra2011.html#ZhongXWZ11
2122150	Fumihiko_Asano	2010	Simulation and experimental studies on passive-dynamic walker that consists of two identical crossed frames.	db/conf/icra/icra2010.html#Asano10
2122151	Robert_A._Nawrocki,Xiaoting_Yang,Sean_E._Shaheen,Richard_M._Voyles	2011	Structured Computational Polymers for a soft robot: Actuation and cognition.	db/conf/icra/icra2011.html#NawrockiYSV11
2122157	Sergi_Foix,Ã ,Juan_Andrade-Cetto,Carme_Torras	2010	Object modeling using a ToF camera under an uncertainty reduction approach.	db/conf/icra/icra2010.html#FoixAAT10
2122164	Michael_Burke	2012	Path-following control of a velocity constrained tracked vehicle incorporating adaptive slip estimation.	db/conf/icra/icra2012.html#Burke12
2122170	John_G._Rogers_III,Henrik_I._Christensen	2012	A conditional random field model for place and object classification.	db/conf/icra/icra2012.html#RogersC12
2122173	Pierre_E._Dupont,Jesse_Lock,Brandon_Itkowitz	2010	Real-time position control of concentric tube robots.	db/conf/icra/icra2010.html#DupontLI10
2122177	Nikhil_Chopra	2010	Control of robotic manipulators under time-varying sensing-control delays.	db/conf/icra/icra2010.html#Chopra10
2122180	Oliver_Kroemer,Emre_Ugur,ztop,Jan_Peters_0001	2012	A kernel-based approach to direct action perception.	db/conf/icra/icra2012.html#KroemerUOP12
2122182	Daniel_Mellinger,Vijay_Kumar_0001	2010	Control and planning for vehicles with uncertainty in dynamics.	db/conf/icra/icra2010.html#MellingerK10
2122183	Ali_Marjovi,alo_Nunes,Pedro_Angelo_Morais_de_Sousa,Ricardo_Faria,Lino_Marques	2010	An olfactory-based robot swarm navigation method.	db/conf/icra/icra2010.html#MarjoviNSFM10
2122201	Hongbin_Liu,Jichun_Li,Qi-ian_Poon,Lakmal_D._Seneviratne,Kaspar_Althoefer	2010	Miniaturized force-indentation depth sensor for tissue abnormality identification during laparoscopic surgery.	db/conf/icra/icra2010.html#LiuLPSA10
2122207	Andreas_von_Dziegielewski,Michael_Hemmer,mer	2012	High quality conservative surface mesh generation for swept volumes.	db/conf/icra/icra2012.html#DziegielewskiHS12
2122212	Michael_Maurer,Markus_Rumpler,Andreas_Wendel,Christof_Hoppe,Arnold_Irschara,Horst_Bischof	2012	Geo-referenced 3D reconstruction: Fusing public geographic data and aerial imagery.	db/conf/icra/icra2012.html#MaurerRWHIB12
2122229	Patrick_J._F._Carle,Timothy_D._Barfoot	2010	Global rover localization by matching lidar and orbital 3D maps.	db/conf/icra/icra2010.html#CarleB10
2122231	Yam_Geva,Amir_Shapiro	2012	A combined potential function and graph search approach for free gait generation of quadruped robots.	db/conf/icra/icra2012.html#GevaS12
2122241	Danelle_C._Shah,Mark_E._Campbell	2011	A robust qualitative planner for mobile robot navigation using human-provided maps.	db/conf/icra/icra2011.html#ShahC11
2122247	Ioan_Alexandru_Sucan,Lydia_E._Kavraki	2012	Accounting for uncertainty in simultaneous task and motion planning using task motion multigraphs.	db/conf/icra/icra2012.html#SucanK12
2122251	Hamidreza_Azimian,Jeremy_Breetzke,Ana_Luisa_Trejos,Rajni_V._Patel,Michael_D._Naish,Terry_M._Peters,John_T._Moore,Chris_Wedlake,Bob_Kiaii	2010	Preoperative planning of robotics-assisted minimally invasive coronary artery bypass grafting.	db/conf/icra/icra2010.html#AzimianBTPNPMWK10
2122256	Dmitry_Berenson,on,Siddhartha_S._Srinivasa	2011	Addressing cost-space chasms in manipulation planning.	db/conf/icra/icra2011.html#BerensonSS11
2122261	Benjamin_J._Cohen,Sachin_Chitta,Maxim_Likhachev	2012	Search-based planning for dual-arm manipulation with upright orientation constraints.	db/conf/icra/icra2012.html#CohenCL12
2122268	Peter_Hansen_0001,Hatem_Alismail,Peter_Rander,Brett_Browning	2011	Monocular visual odometry for robot localization in LNG pipes.	db/conf/icra/icra2011.html#HansenARB11
2122269	Nicolas_Lauzier,ment_Gosselin	2011	Series Clutch Actuators for safe physical human-robot interaction.	db/conf/icra/icra2011.html#LauzierG11
2122275	Naoaki_Yonezawa,Koshi_Kashiwazaki,Kazuhiro_Kosuge,Yasuhisa_Hirata,Yusuke_Sugahara,Mitsuru_Endo,Takashi_Kanbayashi,Koki_Suzuki,Kazunori_Murakami,Kenichi_Nakamura	2012	Car transportation system grasping two drive wheels.	db/conf/icra/icra2012.html#YonezawaKKHSEKSMN12
2122280	Tomer_Anor,Joseph_R._Madsen,Pierre_E._Dupont	2011	Algorithms for design of continuum robots using the concentric tubes approach: A neurosurgical example.	db/conf/icra/icra2011.html#AnorMD11
2122288	Ying_Mao,Sunil_Kumar_Agrawal	2011	A cable driven upper arm exoskeleton for upper extremity rehabilitation.	db/conf/icra/icra2011.html#MaoA11
2122307	Salvatore_Candido,James_C._Davidson,Seth_Hutchinson	2010	Exploiting domain knowledge in planning for uncertain robot systems modeled as POMDPs.	db/conf/icra/icra2010.html#CandidoDH10
2122309	Yuji_Yamakawa,Akio_Namiki,Masatoshi_Ishikawa	2011	Motion planning for dynamic folding of a cloth with two high-speed robot hands and two high-speed sliders.	db/conf/icra/icra2011.html#YamakawaNI11
2122311	Mauro_Cimino,Prabhakar_R._Pagilla	2010	Location of optical mouse sensors on mobile robots for odometry.	db/conf/icra/icra2010.html#CiminoP10
2122325	mmerle,Giorgio_Grisetti,Hauke_Strasdat,Kurt_Konolige,Wolfram_Burgard	2011	G	db/conf/icra/icra2011.html#KummerleGSKB11
2122329	Alper_Aydemir,Adrian_N._Bishop,Patric_Jensfelt	2010	Simultaneous object class and pose estimation for mobile robotic applications with minimalistic recognition.	db/conf/icra/icra2010.html#AydemirBJ10
2122335	Ji-Chul_Ryu,Sunil_Kumar_Agrawal	2010	Differentially flat mobile manipulators mounted with an under-actuated vertical arm.	db/conf/icra/icra2010.html#RyuA10
2122342	nez,Alexander_G._Loukianov,Eduardo_Bayro-Corrochano	2011	Fully nested super-twisting algorithm for uncertain robotic manipulators.	db/conf/icra/icra2011.html#JimenezLB11
2122345	Hao_Men,Biruk_Gebre,Kishore_Pochiraju	2011	Color point cloud registration with 4D ICP algorithm.	db/conf/icra/icra2011.html#MenGP11
2122349	Carmen_M._Graves,Alexander_H._Slocum,Rajiv_Gupta,Conor_James_Walsh	2012	Towards a compact robotically steerable thermal ablation probe.	db/conf/icra/icra2012.html#GravesSGW12
2122373	Francesco_Amigoni,Nicola_Basilico,Nicola_Gatti_0001,Alessandro_Saporiti,Stefano_Troiani	2010	Moving game theoretical patrolling strategies from theory to practice: An USARSim simulation.	db/conf/icra/icra2010.html#AmigoniBGST10
2122374	Jingwen_Dai,Ronald_Chung	2011	Head pose estimation by imperceptible structured light sensing.	db/conf/icra/icra2011.html#DaiC11
2122375	Dong-hai_Wang,Jiajie_Guo,Kok-Meng_Lee,Can-jun_Yang,Hui_Yu	2011	An adaptive knee joint exoskeleton based on biological geometries.	db/conf/icra/icra2011.html#WangGLYY11
2122394	Edwin_Olson	2011	AprilTag: A robust and flexible visual fiducial system.	db/conf/icra/icra2011.html#Olson11
2122406	Benjamin_Pitzer,Christoph_Stiller	2010	Probabilistic mapping for mobile robots using spatial correlation models.	db/conf/icra/icra2010.html#PitzerS10
2122414	Jeremy_A._Marvel,Wyatt_S._Newman	2010	Assessing internal models for faster learning of robotic assembly.	db/conf/icra/icra2010.html#MarvelN10
2122420	o,o_Pedro_Barreto_0001,Abed_Malti	2010	Feature detection and matching in images with radial distortion.	db/conf/icra/icra2010.html#LourencoBM10
2122423	Ada_Zhang,Mark_Malhotra,Yoky_Matsuoka	2011	Musical piano performance by the ACT Hand.	db/conf/icra/icra2011.html#ZhangMM11
2122428	Marianna_Madry,Dan_Song,Danica_Kragic	2012	From object categories to grasp transfer using probabilistic reasoning.	db/conf/icra/icra2012.html#MadrySK12
2122441	Jinoh_Lee,Pyung_Hun_Chang,Dae-Gab_Gweon	2012	A cost function inspired by human arms movement for a bimanual robotic machining.	db/conf/icra/icra2012.html#LeeCG12
2122448	Teppei_Tsujita,Manabu_Ohara,Kazuya_Sase,Atsushi_Konno,Masano_Nakayama,Koyu_Abe,Masaru_Uchiyama	2012	Development of a haptic interface using MR fluid for displaying cutting forces of soft tissues.	db/conf/icra/icra2012.html#TsujitaOSKNAU12
2122469	Mohsen_Moradi_Dalvand,Bijan_Shirinzadeh	2012	Remote centre-of-motion control algorithms of 6-RRCRR parallel robot assisted surgery system (PRAMiSS).	db/conf/icra/icra2012.html#DalvandS12
2122483	Xilun_Ding,Yushu_Yu,J._Jim_Zhu	2011	Trajectory linearization tracking control for dynamics of a multi-propeller and multifunction aerial robot - MMAR.	db/conf/icra/icra2011.html#DingYZ11
2122487	Hiroki_Miyamoto,Akihito_Sano,Yoshito_Ikemata,Shintaro_Maruyama,Hideo_Fujimoto	2010	A study of bouncing rod dynamics aiming at passive running.	db/conf/icra/icra2010.html#MiyamotoSIMF10
2122493	Tak-Kit_Lau,Yunhui_Liu	2012	Stunt driving via policy search.	db/conf/icra/icra2012.html#LauL12a
2122498	Furui_Wang,Milind_Shastri,Christopher_L._Jones,Vikash_Gupta,Christian_Osswald,Xuan_Kang,Derek_G._Kamper,Nilanjan_Sarkar	2011	Design and control of an actuated thumb exoskeleton for hand rehabilitation following stroke.	db/conf/icra/icra2011.html#WangSJGOKKS11
2122499	Ana_Luisa_Trejos,Andrew_C._Lyle,Abelardo_Escoto,Michael_D._Naish,Rajni_V._Patel	2010	Force/position-based modular system for minimally invasive surgery.	db/conf/icra/icra2010.html#TrejosLENP10
2122503	Eitan_Marder-Eppstein,Eric_Berger,Tully_Foote,Brian_P._Gerkey,Kurt_Konolige	2010	The Office Marathon: Robust navigation in an indoor office environment.	db/conf/icra/icra2010.html#Marder-EppsteinBFGK10
2122505	Andrew_J._Fleming	2012	Estimating the resolution of nanopositioning systems from frequency domain data.	db/conf/icra/icra2012.html#Fleming12
2122507	Stefan_S._Groothuis,G._Rusticelli,A._Zucchelli,Stefano_Stramigioli,Raffaella_Carloni	2012	The vsaUT-II: A novel rotational variable stiffness actuator.	db/conf/icra/icra2012.html#GroothuisRZSC12
2122511	Gianluca_Antonelli,Filippo_Arrichiello,Stefano_Chiaverini,Gaurav_S._Sukhatme	2010	Observability analysis of relative localization for AUVs based on ranging and depth measurements.	db/conf/icra/icra2010.html#AntonelliACS10
2122514	Jeremy_Maitin-Shepard,Marco_Cusumano-Towner,Jinna_Lei,Pieter_Abbeel	2010	Cloth grasp point detection based on multiple-view geometric cues with application to robotic towel folding.	db/conf/icra/icra2010.html#Maitin-ShepardCLA10
2122522	Marco_Cognetti,Paolo_Stegagno,Antonio_Franchi,Giuseppe_Oriolo,lthoff	2012	3-D mutual localization with anonymous bearing measurements.	db/conf/icra/icra2012.html#CognettiSFOB12
2122530	Chao-Chieh_Lan,Jung-Yuan_Wang	2011	Design of adjustable constant-force forceps for robot-assisted surgical manipulation.	db/conf/icra/icra2011.html#LanW11
2122547	Raphael_Mannadiar,Ioannis_M._Rekleitis	2010	Optimal coverage of a known arbitrary environment.	db/conf/icra/icra2010.html#MannadiarR10
2122548	Masahiro_Nakajima,Takanori_Hirano,Masaru_Kojima,Naoki_Hisamoto,Michio_Homma,Toshio_Fukuda	2011	Direct nano-injection method by nanoprobe insertion based on E-SEM nanorobotic manipulation under hybrid microscope.	db/conf/icra/icra2011.html#NakajimaHKHHF11
2122549	Frank_Wobbe,Dang_Hung_Nguyen,Walter_Schumacher	2010	Anti-windup design for trajectory tracking of a parallel robot - An holistic approach.	db/conf/icra/icra2010.html#WobbeNS10
2122551	Andres_El-Fakdi,Marc_Carreras,Enric_Galceran	2010	Two steps natural actor critic learning for underwater cable tracking.	db/conf/icra/icra2010.html#El-FakdiCG10
2122556	Bryan_Willimon,Stan_Birchfield,Ian_D._Walker	2011	Classification of clothing using interactive perception.	db/conf/icra/icra2011.html#WillimonBW11
2122560	Marius_Kloetzer,Sanjiv_Itani,Sam_Birch,Calin_Belta	2010	On the need for communication in distributed implementations of LTL motion specifications.	db/conf/icra/icra2010.html#KloetzerIBB10
2122573	Benjamin_Rosman,Subramanian_Ramamoorthy	2010	A game-theoretic procedure for learning hierarchically structured strategies.	db/conf/icra/icra2010.html#RosmanR10
2122580	Wim_Meeussen,Melonee_Wise,Stuart_Glaser,Sachin_Chitta,Conor_McGann,Patrick_Mihelich,Eitan_Marder-Eppstein,Marius_Constantin_Muja,Victor_Eruhimov,Tully_Foote,John_M._Hsu,Radu_Bogdan_Rusu,Bhaskara_Marthi,Gary_R._Bradski,Kurt_Konolige,Brian_P._Gerkey,Eric_Berger	2010	Autonomous door opening and plugging in with a personal robot.	db/conf/icra/icra2010.html#MeeussenWGCMMMMEFHRMBKGB10
2122582	Jan_Faigl,k,sek,Libor_Preucil	2012	On localization uncertainty in an autonomous inspection.	db/conf/icra/icra2012.html#FaiglKVP12
2122585	Jonas_Neubert,Abraham_P._Cantwell,Stephane_Constantin,Michael_Kalontarov,David_Erickson,Hod_Lipson	2010	A robotic module for stochastic fluidic assembly of 3D self-reconfiguring structures.	db/conf/icra/icra2010.html#NeubertCCKEL10
2122593	Matthijs_T._J._Spaan,alves,o_Sequeira	2010	Multirobot coordination by auctioning POMDPs.	db/conf/icra/icra2010.html#SpaanGS10
2122595	Keith_W._Wait,Phil_J._Jackson,Lanny_S._Smoot	2010	Self locomotion of a spherical rolling robot using a novel deformable pneumatic method.	db/conf/icra/icra2010.html#WaitJS10
2122603	Geoffrey_A._Hollinger,Sanjiv_Singh	2010	Multi-robot coordination with periodic connectivity.	db/conf/icra/icra2010.html#HollingerS10
2122632	Andrea_Censi,Richard_M._Murray	2011	Bootstrapping bilinear models of robotic sensorimotor cascades.	db/conf/icra/icra2011.html#CensiM11
2122640	Yuhua_Zheng,Yan_Meng	2011	Modular neural networks for multi-class object recognition.	db/conf/icra/icra2011.html#ZhengM11
2122643	Gianluca_Antonelli,Stefano_Chiaverini,Alessandro_Marino	2012	A coordination strategy for multi-robot sampling of dynamic fields.	db/conf/icra/icra2012.html#AntonelliCM12
2122655	David_R._Thompson,Steve_A._Chien,Yi_Chao,Peggy_Li,Bronwyn_Cahill,Julia_Levin,Oscar_Schofield,Arjuna_P._Balasuriya,Stephanie_Petillo,Matt_Arrott,Michael_Meisinger	2010	Spatiotemporal path planning in strong, dynamic, uncertain currents.	db/conf/icra/icra2010.html#ThompsonCCLCLSBPAM10
2122660	Cooper_Bills,Joyce_Chen,Ashutosh_Saxena	2011	Autonomous MAV flight in indoor environments using single image perspective cues.	db/conf/icra/icra2011.html#BillsCS11
2122663	Mark_G._Arnold,Jung_H._Cho	2010	Dual-stylus-arm scratch drive micro-robots controlled by an onboard parallax algorithm.	db/conf/icra/icra2010.html#ArnoldC10
2122670	Sang-ik_An,Dong-Soo_Kwon	2011	Zero-moment point feedback balance control of leg-wheel hybrid structures by using dynamic decoupling and control allocation.	db/conf/icra/icra2011.html#AnK11
2122675	Seungmoon_Song,Hartmut_Geyer	2012	Regulating speed and generating large speed transitions in a neuromuscular human walking model.	db/conf/icra/icra2012.html#SongG12
2122694	Somayeh_Bahrami,Mehrzad_Namvar	2010	Motion tracking in robotic manipulators in presence of delay in measurements.	db/conf/icra/icra2010.html#BahramiN10
2122696	Umashankar_Nagarajan,George_Kantor,Ralph_L._Hollis	2012	Integrated planning and control for graceful navigation of shape-accelerated underactuated balancing mobile robots.	db/conf/icra/icra2012.html#NagarajanKH12a
2122704	Shabbir_Kurbanhusen_Mustafa,Sunil_Kumar_Agrawal	2012	influence of spring placements.	db/conf/icra/icra2012.html#MustafaA12
2122713	Carlos_Rafael_Tercero_Villagran,Seiichi_Ikeda,Motoki_Matsushima,Toshio_Fukuda,Makoto_Negoro,Ikuo_Takahashi	2010	Photoelastic stress analysis error quantification in vasculature models for robot feedback control.	db/conf/icra/icra2010.html#VillagranIMFNT10
2122714	Susanne_Petsch,Darius_Burschka	2010	Estimation of spatio-temporal object properties for manipulation tasks from observation of humans.	db/conf/icra/icra2010.html#PetschB10
2122719	Jungwon_Seo,Soonkyum_Kim,Vijay_Kumar_0001	2012	Planar, bimanual, whole-arm grasping.	db/conf/icra/icra2012.html#SeoKK12
2122730	Dongjun_Lee,Ke_Huang	2010	Peer-to-peer control architecture for multiuser haptic collaboration over undirected delayed packet-switching network.	db/conf/icra/icra2010.html#LeeH10
2122732	Arthur_Mahoney,Joshua_Bross,David_Johnson	2010	Deformable robot motion planning in a reduced-dimension configuration space.	db/conf/icra/icra2010.html#MahoneyBJ10
2122738	Baoyang_Deng,Andres_K._Valenzuela,Bill_Goodwine	2010	Bifurcations of optimal solutions for coordinated robotic systems: Numerical and homotopy methods.	db/conf/icra/icra2010.html#DengVG10
2122740	Wen-Shyong_Yu,Chan-Chih_Yeh	2011	Steering and balance controls of an electrical bicycle using integral sliding mode control.	db/conf/icra/icra2011.html#YuY11
2122756	Magnus_Bjerkeng,Kristin_Ytterstad_Pettersen	2012	A new Coriolis matrix factorization.	db/conf/icra/icra2012.html#BjerkengP12
2122760	Mokrane_Boudaoud,Yassine_Haddab,Yann_Le_Gorrec,Philippe_Lutz	2011	Effects of environmental noise on the accuracy of millimeter sized grippers in cantilever configuration and active stabilisation.	db/conf/icra/icra2011.html#BoudaoudHGL11
2122781	bastien_Briot,Anatoly_Pashkevich,Damien_Chablat	2010	Optimal technology-oriented design of parallel robots for high-speed machining applications.	db/conf/icra/icra2010.html#BriotPC10
2122788	Jeremiah_J._Neubert,Nicola_J._Ferrier	2010	Motion generation through biologically-inspired torque pulses.	db/conf/icra/icra2010.html#NeubertF10
2122808	Alessandro_De_Luca_0001,Giuseppe_Oriolo,Paolo_Robuffo_Giordano	2010	Kinematic control of nonholonomic mobile manipulators in the presence of steering wheels.	db/conf/icra/icra2010.html#LucaOG10
2122815	alves,Andrew_I._Comport	2011	Real-time direct tracking of color images in the presence of illumination variation.	db/conf/icra/icra2011.html#GoncalvesC11
2122816	Duc_Fehr,Anoop_Cherian,Ravishankar_Sivalingam,Sam_Nickolay,Vassilios_Morellas,Nikolaos_Papanikolopoulos	2012	Compact covariance descriptors in 3D point clouds for object recognition.	db/conf/icra/icra2012.html#FehrCSNMP12
2122820	Franz_Andert,Florian_Adolf,Lukas_Goormann,rg_S._Dittrich	2011	Mapping and path planning in complex environments: An obstacle avoidance approach for an unmanned helicopter.	db/conf/icra/icra2011.html#AndertAGD11
2122821	Arren_J._Glover,William_P._Maddern,Michael_Milford,Gordon_Fraser_Wyeth	2010	FAB-MAP + RatSLAM: Appearance-based SLAM for multiple times of day.	db/conf/icra/icra2010.html#GloverMMW10
2122823	Andreas_Tobergte,hlich,Mihai_Pomarlan,Gerd_Hirzinger	2010	Towards accurate motion compensation in surgical robotics.	db/conf/icra/icra2010.html#TobergteFPH10
2122837	Julien_Gagne,Olivier_Piccin,Edouard_Laroche,Michele_Diana,Jacques_Gangloff	2011	GyroLock - first in vivo experiments of active heart stabilization using Control Moment Gyro (CMG).	db/conf/icra/icra2011.html#GagnePLDG11
2122843	Kevin_Lai,Liefeng_Bo,Xiaofeng_Ren,Dieter_Fox	2011	A large-scale hierarchical multi-view RGB-D object dataset.	db/conf/icra/icra2011.html#LaiBRF11
2122846	Ryan_S._Penning,Jinwoo_Jung,Justin_A._Borgstadt,Nicola_J._Ferrier,Michael_R._Zinn	2011	Towards closed loop control of a continuum robotic manipulator for medical applications.	db/conf/icra/icra2011.html#PenningJBFZ11
2122847	Alon_Capua,Amir_Shapiro,Shraga_Shoval	2011	SpiderBot: A cable suspended mobile robot.	db/conf/icra/icra2011.html#CapuaSS11
2122858	Martin_Rufli,Roland_Siegwart	2010	On the design of deformable input- / state-lattice graphs.	db/conf/icra/icra2010.html#RufliS10
2122865	Xiaoming_Chai,Xiaoqiang_Tang,Lewei_Tang,Qiujian_Lu	2012	Error modeling and accuracy analysis of a multi-level hybrid support robot.	db/conf/icra/icra2012.html#ChaiTTL12
2122877	Pey_Yuen_Tao,Guilin_Yang,Masayoshi_Tomizuka	2012	A sensor-based approach for error compensation of industrial robotic workcells.	db/conf/icra/icra2012.html#TaoYT12
2122880	Manh_Tung_Pham,Amrith_Dhananjayan,Kiam_Tian_Seow	2010	On the transparency of automata as discrete-event control specifications.	db/conf/icra/icra2010.html#PhamDS10
2122885	Michael_Rubenstein,Christian_Ahler,Radhika_Nagpal	2012	Kilobot: A low cost scalable robot system for collective behaviors.	db/conf/icra/icra2012.html#RubensteinAN12
2122892	Jonathon_W._Sensinger,Stephen_D._Clark,Jack_F._Schorsch	2011	Exterior vs. interior rotors in robotic brushless motors.	db/conf/icra/icra2011.html#SensingerCS11
2122898	Michael_Ruhnke,mmerle,Giorgio_Grisetti,Wolfram_Burgard	2011	Highly accurate maximum likelihood laser mapping by jointly optimizing laser points and robot poses.	db/conf/icra/icra2011.html#RuhnkeKGB11
2122909	Frank_L._Hammond,Jonathan_Weisz,Andres_A._de_la_Llera_Kurth,Peter_K._Allen,Robert_D._Howe	2012	Towards a design optimization method for reducing the mechanical complexity of underactuated robotic hands.	db/conf/icra/icra2012.html#HammondWKAH12
2122911	Bert_Willaert,Michel_Franken,Hendrik_Van_Brussel,Emmanuel_B._Vander_Poorten	2011	On the use of shunt impedances versus bounded environment passivity for teleoperation systems.	db/conf/icra/icra2011.html#WillaertFBP11
2122919	Ludovic_Righetti,Jonas_Buchli,Michael_Mistry,Stefan_Schaal	2011	Inverse dynamics control of floating-base robots with external constraints: A unified view.	db/conf/icra/icra2011.html#RighettiBMS11
2122920	Antonio_Franchi,Giuseppe_Oriolo,Paolo_Stegagno	2010	On the solvability of the Mutual Localization problem with Anonymous Position Measures.	db/conf/icra/icra2010.html#FranchiOS10
2122922	Luca_Carlone,Miguel_Efrain_Kaouk_Ng,Jingjing_Du,Basilio_Bona,Marina_Indri	2010	Rao-Blackwellized Particle Filters multi robot SLAM with unknown initial correspondences and limited communication.	db/conf/icra/icra2010.html#CarloneNDBI10
2122929	Thanathorn_Phoka,Attawith_Sudsang	2010	Regrasp planning of three-fingered hand for a polygonal object.	db/conf/icra/icra2010.html#PhokaS10
2122934	Bradford_Neuman,Boris_Sofman,Anthony_Stentz,J._Andrew_Bagnell	2011	Segmentation-based online change detection for mobile robots.	db/conf/icra/icra2011.html#NeumanSSB11
2122937	Shuai_Li,Yi_Guo	2012	Distributed source seeking by cooperative robots: All-to-all and limited communications.	db/conf/icra/icra2012.html#LiG12
2122940	Simon_Muntwyler,Felix_Beyeler,Bradley_J._Nelson	2010	Three-axis micro-force sensor with tunable force range and sub-micronewton measurement uncertainty.	db/conf/icra/icra2010.html#MuntwylerBN10
2122963	Advait_Jain,Charles_C._Kemp	2010	Pulling open doors and drawers: Coordinating an omni-directional base and a compliant arm with Equilibrium Point control.	db/conf/icra/icra2010.html#JainK10
2122965	Momotaz_Begum,Fakhri_Karray	2011	Integrating visual exploration and visual search in robotic visual attention: The role of human-robot interaction.	db/conf/icra/icra2011.html#BegumK11
2122966	Marcelo_Kallmann,Yazhou_Huang,Robert_Backman	2010	A skill-based motion planning framework for humanoids.	db/conf/icra/icra2010.html#KallmannHB10
2122968	Yalei_Feng,Daokui_Qu,Fang_Xu,Hongguang_Wang,XiaoDong_Su	2011	Analysis and compensation for the dynamic error of the FPD glass substrates transfer robot.	db/conf/icra/icra2011.html#FengQXWS11
2122970	ller_0002,Timo_Hufnagel	2011	A projection method for the elimination of contradicting control forces in redundantly actuated PKM.	db/conf/icra/icra2011.html#0002H11
2122982	Hyunpyo_Shin,Sungcheul_Lee,Jay_il_Jeong,JongWon_Kim_0002	2011	Kinematic optimization for isotropic stiffness of redundantly actuated parallel manipulators.	db/conf/icra/icra2011.html#ShinLJK11
2122983	Dugan_Um,Dongseok_Ryu,Myungjoon_Kal,Sungchul_Kang	2012	Short range 3D depth sensing via multiple intensity differentiation.	db/conf/icra/icra2012.html#UmRKK12
2122984	Hao_Su,Diana_C._Cardona,Weijian_Shang,Alexander_Camilo,Gregory_A._Cole,D._Caleb_Rucker,Robert_J._Webster,Gregory_S._Fischer	2012	A MRI-guided concentric tube continuum robot with piezoelectric actuation: A feasibility study.	db/conf/icra/icra2012.html#SuCSCCRWF12
2122987	Liang_Ju,Gabriele_Ferri,Cecilia_Laschi,Barbara_Mazzolai,Paolo_Dario	2010	Experimental results of a novel amphibian solution for aquatic robot.	db/conf/icra/icra2010.html#JuFLMD10
2123034	Nicolas_Lauzier,ment_Gosselin	2010	3-DOF Cartesian Force Limiting Device Based on the Delta architecture for safe physical human-robot interaction.	db/conf/icra/icra2010.html#LauzierG10
2123039	Adrien_Briod,Jean-Christophe_Zufferey,Dario_Floreano	2012	Automatically calibrating the viewing direction of optic-flow sensors.	db/conf/icra/icra2012.html#BriodZF12
2123062	Gert_Kootstra,Danica_Kragic	2011	Fast and bottom-up object detection, segmentation, and evaluation using Gestalt principles.	db/conf/icra/icra2011.html#KootstraK11
2123071	Young_Jin_Park,Hosun_Lee,Yonghwan_Oh,Wan_Kyun_Chung	2012	Development of Kalman Filter based two-port Body Force Observer for the flexible joint: Design and experiments.	db/conf/icra/icra2012.html#ParkLOC12
2123084	Bokman_Lim,Minhyung_Lee,Joohyung_Kim,Jusuk_Lee,Jaeho_Park,Keehong_Seo,Kyung_Shik_Roh	2012	Control design to achieve dynamic walking on a bipedal robot with compliance.	db/conf/icra/icra2012.html#LimLKLPSR12
2123085	Matteo_Cianchetti,Maurizio_Follador,Barbara_Mazzolai,Paolo_Dario,Cecilia_Laschi	2012	Design and development of a soft robotic octopus arm exploiting embodied intelligence.	db/conf/icra/icra2012.html#CianchettiFMDL12
2123090	Evan_Ribnick,Vassilios_Morellas,Nikos_Papanikolopoulos	2010	Human motion patterns from single camera cues for medical applications.	db/conf/icra/icra2010.html#RibnickMP10
2123098	Craig_Corcoran,Robert_Platt	2010	A measurement model for tracking hand-object state during dexterous manipulation.	db/conf/icra/icra2010.html#CorcoranP10
2123108	Brian_Yamauchi	2010	All-weather perception for man-portable robots using ultra-wideband radar.	db/conf/icra/icra2010.html#Yamauchi10
2123119	Patrick_Opdenbosch,Nader_Sadegh,Wayne_J._Book,Aaron_R._Enes	2011	Auto-calibration based control for independent metering of hydraulic actuators.	db/conf/icra/icra2011.html#OpdenboschSBE11
2123122	Robert_Bauernschmitt,Martin_Buss,Barbara_Deml,Klaus_Diepold,rber,rber,Ulrich_Hagn,Gerd_Hirzinger,Sandra_Hirche,Alois_Knoll,ller,Tobias_Ortmaier,Angelika_Peer,Michael_Popp,Carsten_Preusche,Gunther_Reinhart,Zhuanghua_Shi,Eckehard_G._Steinbach,Heinz_Ulbrich,Ulrich_Walter,h	2010	High-fidelity telepresence and teleaction.	db/conf/icra/icra2010.html#BauernschmittBDDFFHHHKMOPPPRSSUWZ10
2123123	Yoshihiro_Tanaka,Kazuki_Doumoto,Akihito_Sano,Hideo_Fujimoto	2010	Development of a sensor system with syringe based on tactile sensing using balloon expansion.	db/conf/icra/icra2010.html#TanakaDSF10
2123155	Dennis_Majoe,Lars_Widmer,rg_Gutknecht	2011	Pneumatic Air Muscle and Pneumatic sources for light weight autonomous robots.	db/conf/icra/icra2011.html#MajoeWG11
2123162	Jooeun_Ahn,Daniel_Klenk,Neville_Hogan	2012	A simple bipedal walking model reproduces entrainment of human locomotion.	db/conf/icra/icra2012.html#AhnKH12
2123176	Edward_B._Steager,Mahmut_Selman_Sakar,Ceridwen_Magee,Monroe_Kennedy,Anthony_Cowley,Vijay_Kumar_0001	2012	Automated biomanipulation of single cells.	db/conf/icra/icra2012.html#SteagerSMKCK12
2123186	Yogesh_A._Girdhar,Gregory_Dudek	2012	Efficient on-line data summarization using extremum summaries.	db/conf/icra/icra2012.html#GirdharD12
2123195	Haiyan_Wu,Chih-Chung_Chen,Jiayun_Feng,hnlenz,Sandra_Hirche	2010	A switching control law for a networked visual servo control system.	db/conf/icra/icra2010.html#WuCFKH10
2123214	Jianning_Hua,Hongyi_Li,Yuechao_Wang,Ning_Xi	2011	MDL-based control method for mobile robot with randomly varying time-delay.	db/conf/icra/icra2011.html#HuaLWX11
2123219	Takeshi_Kano,Takahide_Sato,Ryo_Kobayashi,Akio_Ishiguro	2011	Decentralized control of scaffold-assisted serpentine locomotion that exploits body softness.	db/conf/icra/icra2011.html#KanoSKI11
2123240	li,Manuela_M._Veloso,H._Levent_Akin	2012	Efficient task execution and refinement through multi-resolution corrective demonstration.	db/conf/icra/icra2012.html#MericliVA12
2123245	Michael_Sfakiotakis,Asimina_Kazakidi,Nikolaos_Pateromichelakis,John_A._Ekaterinaris,Dimitris_P._Tsakiris	2012	Robotic underwater propulsion inspired by the octopus multi-arm swimming.	db/conf/icra/icra2012.html#SfakiotakisKPET12
2123252	Tatsuya_Miyamoto,Masaru_Kojima,Masahiro_Nakajima,Michio_Homma,Toshio_Fukuda	2012	Rotation of bacteria sheet driven micro gear in open micro channel.	db/conf/icra/icra2012.html#MiyamotoKNHF12
2123256	Sachithra_Hemachandra,Thomas_Kollar,Nicholas_Roy,Seth_J._Teller	2011	Following and interpreting narrated guided tours.	db/conf/icra/icra2011.html#HemachandraKRT11
2123263	Vincenzo_Lippiello,Bruno_Siciliano,Luigi_Villani	2011	Online dextrous-hand grasping force optimization with dynamic torque constraints selection.	db/conf/icra/icra2011.html#LippielloSV11
2123267	Andreas_Lawitzky,Daniel_Althoff,Dirk_Wollherr,Martin_Buss	2011	Dynamic Window Approach for omni-directional robots with polygonal shape.	db/conf/icra/icra2011.html#LawitzkyAWB11
2123299	Kyle_Gilpin,Ara_Knaian,Daniela_Rus	2010	Robot pebbles: One centimeter modules for programmable matter through self-disassembly.	db/conf/icra/icra2010.html#GilpinKR10
2123302	Ondrej_Miksik,Petr_Petyovsky,Ludek_Zalud,Pavel_Jura	2011	Robust detection of shady and highlighted roads for monocular camera based navigation of UGV.	db/conf/icra/icra2011.html#MiksikPZJ11
2123305	Hauke_Strasdat,J._M._M._Montiel,Andrew_J._Davison	2010	Real-time monocular SLAM: Why filter?	db/conf/icra/icra2010.html#StrasdatMD10
2123310	Tom_Larkworthy,Subramanian_Ramamoorthy	2010	An efficient algorithm for self-reconfiguration planning in a modular robot.	db/conf/icra/icra2010.html#LarkworthyR10
2123313	T._Thomson,Inna_Sharf,Blake_Beckman	2012	Kinematic control and posture optimization of a redundantly actuated quadruped robot.	db/conf/icra/icra2012.html#ThomsonSB12
2123320	Thomas_Peter_Huryn,Billy_Liang_Luu,H._F._Machiel_Van_der_Loos,Jean_Sebastien_Blouin,Elizabeth_A._Croft	2010	Investigating human balance using a robotic motion platform.	db/conf/icra/icra2010.html#HurynLLBC10
2123322	Robert_Kaplow,Amin_Atrash,Joelle_Pineau	2010	Variable resolution decomposition for robotic navigation under a POMDP framework.	db/conf/icra/icra2010.html#KaplowAP10
2123328	Mitsuru_Higashimori,Kayo_Yoshimoto,Makoto_Kaneko	2010	Active shaping of an unknown rheological object based on deformation decomposition into elasticity and plasticity.	db/conf/icra/icra2010.html#HigashimoriYK10
2123333	Jeff_Johnson_0002,Kris_K._Hauser	2012	Optimal acceleration-bounded trajectory planning in dynamic environments along a specified path.	db/conf/icra/icra2012.html#JohnsonH12
2123340	Daniel_S._Walker,John_Kenneth_Salisbury_Jr.,nter_Niemeyer	2011	Demonstrating the benefits of variable impedance to telerobotic task execution.	db/conf/icra/icra2011.html#WalkerSN11
2123348	Yajia_Zhang,Jingru_Luo,Kris_K._Hauser	2012	Sampling-based motion planning with dynamic intermediate state objectives: Application to throwing.	db/conf/icra/icra2012.html#ZhangLH12
2123367	Andres_K._Valenzuela,Sangbae_Kim	2012	Optimally Scaled Hip-Force Planning: A control approach for quadrupedal running.	db/conf/icra/icra2012.html#ValenzuelaK12
2123368	Hiroya_Yamada,Shigeo_Hirose	2010	Approximations to continuous curves of Active Cord Mechanism made of arc-shaped joints or double joints.	db/conf/icra/icra2010.html#YamadaH10
2123377	Kazunori_Ohno,Satoshi_Tadokoro,Keiji_Nagatani,Eiji_Koyanagi,Tomoaki_Yoshida	2010	Trials of 3-D map construction using the tele-operated tracked vehicle kenaf at disaster city.	db/conf/icra/icra2010.html#OhnoTNKY10
2123382	Gorkem_Erinc,Stefano_Carpin	2012	Anytime merging of appearance based maps.	db/conf/icra/icra2012.html#ErincC12
2123397	Akihiro_Yamaguchi,Kenjiro_Takemura,Shinichi_Yokota,Kazuya_Edamura	2011	A robot hand using electro-conjugate fluid.	db/conf/icra/icra2011.html#YamaguchiTYE11
2123398	Nicolas_Perrin,Olivier_Stasse,Florent_Lamiraux,Eiichi_Yoshida	2011	A biped walking pattern generator based on "half-steps" for dimensionality reduction.	db/conf/icra/icra2011.html#PerrinSLY11
2123404	U-Xuan_Tan,Bo_Yang,Rao_P._Gullapalli,Jaydev_P._Desai	2010	Design and development of a 3-axis MRI-compatible force sensor.	db/conf/icra/icra2010.html#TanYGD10
2123409	Andreas_Tobergte,Mihai_Pomarlan,Georg_Passig,Gerd_Hirzinger	2011	An approach to ulta-tightly coupled data fusion for handheld input devices in robotic surgery.	db/conf/icra/icra2011.html#TobergtePPH11
2123411	Xia_Zhang,Minoru_Hashimoto	2011	Inhibitory connections between neural oscillators for a robotic suit.	db/conf/icra/icra2011.html#ZhangH11
2123433	Yun_Jiang,Changxi_Zheng,Marcus_Lim,Ashutosh_Saxena	2012	Learning to place new objects.	db/conf/icra/icra2012.html#JiangZLS12
2123435	Van_T._Huynh,Ryan_N._Smith,Ngai_Ming_Kwok,Jayantha_Katupitiya	2012	A nonlinear PI and backstepping-based controller for tractor-steerable trailers influenced by slip.	db/conf/icra/icra2012.html#HuynhSKK12
2123447	Javier_Alonso-Mora,Andreas_Breitenmoser,Paul_A._Beardsley,Roland_Siegwart	2012	Reciprocal collision avoidance for multiple car-like robots.	db/conf/icra/icra2012.html#Alonso-MoraBBS12
2123454	Patrick_Bouffard,Anil_Aswani,Claire_Tomlin	2012	Learning-based model predictive control on a quadrotor: Onboard implementation and experimental results.	db/conf/icra/icra2012.html#BouffardAT12
2123459	Janne_Laaksonen,Javier_Felip,Antonio_Morales,Ville_Kyrki	2010	Embodiment independent manipulation through action abstraction.	db/conf/icra/icra2010.html#LaaksonenFMK10
2123462	Pedro_Moreira,Chao_Liu_0003,Nabil_Zemiti,Philippe_Poignet	2012	Soft tissue force control using active observers and viscoelastic interaction model.	db/conf/icra/icra2012.html#MoreiraLZP12
2123466	Chih-Han_Yu,Justin_Werfel,Radhika_Nagpal	2010	Coordinating collective locomotion in an amorphous modular robot.	db/conf/icra/icra2010.html#YuWN10
2123468	Damien_Jade_Duff,Jeremy_L._Wyatt,Rustam_Stolkin	2010	Motion estimation using physical simulation.	db/conf/icra/icra2010.html#DuffWS10
2123477	Robert_Shade,Paul_Newman_0001	2011	Choosing where to go: Complete 3D exploration with stereo.	db/conf/icra/icra2011.html#ShadeN11
2123481	Hong_Liu,Huijun_He	2010	A salient feature and scene semantics based attention model for human tracking on mobile robots.	db/conf/icra/icra2010.html#LiuH10
2123487	Fumihiko_Asano,Masashi_Suguro	2011	Limit cycle running of telescopic-legged rimless wheel.	db/conf/icra/icra2011.html#AsanoS11
2123525	Jens_Cortsen,rgensen,lvason,Henrik_Gordon_Petersen	2012	Simulating robot handling of large scale deformable objects: Manufacturing of unique concrete reinforcement structures.	db/conf/icra/icra2012.html#CortsenJSP12
2123530	Daniel_J._Ricks,Mark_B._Colton	2010	Trends and considerations in robot-assisted autism therapy.	db/conf/icra/icra2010.html#RicksC10
2123540	Kenji_Hashimoto,Yuki_Takezaki,Hiromitsu_Motohashi,Takuya_Otani,Tatsuhiro_Kishi,Hun-ok_Lim,Atsuo_Takanishi	2012	Biped walking stabilization based on gait analysis.	db/conf/icra/icra2012.html#HashimotoTMOKLT12
2123554	Gianluca_Palli,Salvatore_Pirozzi	2011	Miniaturized optical-based force sensors for tendon-driven robots.	db/conf/icra/icra2011.html#PalliP11
2123556	Ali_Borji,Laurent_Itti	2011	Scene classification with a sparse set of salient regions.	db/conf/icra/icra2011.html#BorjiI11
2123559	Kyle_N._Winfree,Joseph_M._Romano,Jamie_Gewirtz,Katherine_J._Kuchenbecker	2010	Control of a high fidelity ungrounded torque feedback device: The iTorqU 2.1.	db/conf/icra/icra2010.html#WinfreeRGK10
2123565	Makoto_Kumon,Hugh_Cover,Jayantha_Katupitiya	2010	Hovering control of vectored thrust aerial vehicles.	db/conf/icra/icra2010.html#KumonCK10
2123583	Zheng_Fan,Xinyong_Tao,Xudong_Cui,Xudong_Fan,Xiaobin_Zhang,Lixin_Dong	2011	Electromigration-based deposition enabled by nanorobotic manipulation inside a transmission electron microscope.	db/conf/icra/icra2011.html#FanTCFZD11
2123587	re,ric_Marchand,Laurent_Eck	2010	Using multiple hypothesis in model-based tracking.	db/conf/icra/icra2010.html#TeuliereME10
2123588	Yajing_Shen,Masahiro_Nakajima,Pei_Di,Tao_Yue,Seiji_Kojima,Michio_Homma,Toshio_Fukuda	2012	Development of the auto manipulation system towards the single cell automatic analysis inside an environmental SEM.	db/conf/icra/icra2012.html#ShenNDYKHF12
2123590	Masakazu_Hirokawa,Naohisa_Uesugi,Satoru_Furugori,Tomoko_Kitagawa,Kenji_Suzuki	2012	A haptic instruction based assisted driving system for training the reverse parking.	db/conf/icra/icra2012.html#HirokawaUFKS12
2123591	Peter_Kaiser,Dmitry_Berenson,Nikolaus_Vahrenkamp,Tamim_Asfour,diger_Dillmann,Siddhartha_S._Srinivasa	2012	Constellation - An algorithm for finding robot configurations that satisfy multiple constraints.	db/conf/icra/icra2012.html#KaiserBVADS12
2123594	Nelson_Rosa,Adam_Barber,Robert_D._Gregg,Kevin_M._Lynch	2012	Stable open-loop brachiation on a vertical wall.	db/conf/icra/icra2012.html#RosaBGL12
2123597	Roy_Godzdanker,Matthew_J._Rutherford,Kimon_P._Valavanis	2012	Improving endurance of autonomous aerial vehicles through intelligent service-station placement.	db/conf/icra/icra2012.html#GodzdankerRV12
2123602	Geoffrey_Biggs	2010	Applying regression testing to software for robot hardware interaction.	db/conf/icra/icra2010.html#Biggs10a
2123615	Shoudong_Huang,Heng_Wang,Udo_Frese,Gamini_Dissanayake	2012	On the number of local minima to the point feature based SLAM problem.	db/conf/icra/icra2012.html#HuangWFD12
2123630	mez,Moises_Alencastre-Miranda,Rigoberto_Lopez-Padilla,Rafael_Murrieta-Cid	2011	Exploration and map-building under uncertainty with multiple heterogeneous robots.	db/conf/icra/icra2011.html#Munoz-GomezALM11
2123631	Nikolaus_Vahrenkamp,Peter_Kaiser,Tamim_Asfour,diger_Dillmann	2011	RDT	db/conf/icra/icra2011.html#VahrenkampKAD11
2123651	Thomas_Haase,rn	2010	Real-time collision detection for intrinsic safety of Multi-fingered SDH-2.	db/conf/icra/icra2010.html#HaaseW10
2123655	Joseph_M._Romano,Takashi_Yoshioka,Katherine_J._Kuchenbecker	2010	Automatic filter design for synthesis of haptic textures from recorded acceleration data.	db/conf/icra/icra2010.html#RomanoYK10
2123656	Gerardo_Carrera,Adrien_Angeli,Andrew_J._Davison	2011	SLAM-based automatic extrinsic calibration of a multi-camera rig.	db/conf/icra/icra2011.html#CarreraAD11
2123671	Yu_Zhang,Lynne_E._Parker	2010	A general information quality based approach for satisfying sensor constraints in multirobot tasks.	db/conf/icra/icra2010.html#ZhangP10
2123694	Daniel_S._Walker,Robert_P._Wilson,nter_Niemeyer	2010	User-controlled variable impedance teleoperation.	db/conf/icra/icra2010.html#WalkerWN10
2123705	Jung-Suk_Lee,Chanki_Kim,Wan_Kyun_Chung	2010	Robust RBPF-SLAM using sonar sensors in non-static environments.	db/conf/icra/icra2010.html#LeeKC10
2123709	Marta_Niccolini,Gianluigi_Petroni,Arianna_Menciassi,Paolo_Dario	2012	Real-time control architecture of a novel Single-Port lapaRoscopy bimaNual roboT (SPRINT).	db/conf/icra/icra2012.html#NiccoliniPMD12
2123717	Haifeng_Li,Dezhen_Song,Yan_Lu,Jingtai_Liu	2012	A two-view based multilayer feature graph for robot navigation.	db/conf/icra/icra2012.html#LiSLL12
2123721	Sylvain_Martel,Mahmood_Mohammadi	2010	Using a swarm of self-propelled natural microrobots in the form of flagellated bacteria to perform complex micro-assembly tasks.	db/conf/icra/icra2010.html#MartelM10
2123733	n_Badino,Daniel_F._Huber,Yongwoon_Park,Takeo_Kanade	2011	Fast and accurate computation of surface normals from range images.	db/conf/icra/icra2011.html#BadinoHPK11
2123734	Joonbum_Bae,Wenlong_Zhang,Masayoshi_Tomizuka	2012	Compensation of packet loss for a network-based rehabilitation system.	db/conf/icra/icra2012.html#BaeZT12
2123736	Mehmet_Alper_Ergin,Volkan_Patoglu	2012	ASSISTON-SE: A self-aligning shoulder-elbow exoskeleton.	db/conf/icra/icra2012.html#ErginP12
2123737	Paul_E._I._Pounds,Daniel_R._Bersak,Aaron_M._Dollar	2011	The Yale Aerial Manipulator: Grasping in flight.	db/conf/icra/icra2011.html#PoundsBD11a
2123744	Hongbin_Liu,Xiaojing_Song,Thrishantha_Nanayakkara,Lakmal_D._Seneviratne,Kaspar_Althoefer	2012	A computationally fast algorithm for local contact shape and pose classification using a tactile array sensor.	db/conf/icra/icra2012.html#LiuSNSA12
2123748	Joshua_Z._Zheng,Sara_De_La_Rosa,Aaron_M._Dollar	2011	An investigation of grasp type and frequency in daily household and machine shop tasks.	db/conf/icra/icra2011.html#ZhengRD11
2123749	Donald_Ruffatto,Matthew_Spenko	2012	Parameter optimization of directional dry adhesives for robotic climbing and gripping applications.	db/conf/icra/icra2012.html#RuffattoS12
2123750	Hicham_Hadj-Abdelkader,Youcef_Mezouar,Thierry_Chateau	2012	Generic realtime kernel based tracking.	db/conf/icra/icra2012.html#Hadj-AbdelkaderMC12
2123754	Daniel_Conrad,Guilherme_N._DeSouza	2010	Homography-based ground plane detection for mobile robot navigation using a Modified EM algorithm.	db/conf/icra/icra2010.html#ConradD10
2123755	Byungjae_Park,Jinwoo_Choi,Wan_Kyun_Chung	2012	An efficient mobile robot path planning using hierarchical roadmap representation in indoor environment.	db/conf/icra/icra2012.html#ParkCC12
2123756	Luigi_Biagiotti,Claudio_Melchiorri	2010	B-spline based filters for multi-point trajectories planning.	db/conf/icra/icra2010.html#BiagiottiM10
2123758	Robert_Platt,Muhammad_E._Abdallah,Charles_W._Wampler	2011	Multiple-priority impedance control.	db/conf/icra/icra2011.html#PlattAW11
2123764	Chanki_Kim,Hyoungkyun_Kim,Wan_Kyun_Chung	2011	Exactly Rao-Blackwellized unscented particle filters for SLAM.	db/conf/icra/icra2011.html#KimKC11
2123777	Mariusz_Janiak,Krzysztof_Tchon	2010	Towards constrained motion planning of mobile manipulators.	db/conf/icra/icra2010.html#JaniakT10
2123792	Andreas_Birk_0002	2010	Using recursive spectral registrations to determine brokenness as measure of structural map errors.	db/conf/icra/icra2010.html#Birk10
2123803	Brian_K._Post,Wayne_J._Book	2011	A robust nonlinear observation strategy for the control of flexible manipulators.	db/conf/icra/icra2011.html#PostB11
2123804	Joshua_Gleason,Ara_V._Nefian,Xavier_Bouyssounousse,Terry_Fong,George_Bebis	2011	Vehicle detection from aerial imagery.	db/conf/icra/icra2011.html#GleasonNBFB11
2123808	Michael_P._Ashley-Rollman,Padmanabhan_Pillai,Michelle_L._Goodstein	2011	Simulating multi-million-robot ensembles.	db/conf/icra/icra2011.html#Ashley-RollmanPG11
2123814	Yoon_Jung_Jeong,Homayoon_Kazerooni,Eugen_Solowjow,Jakob_Katz	2011	Semi-automated haptic device for cable installation.	db/conf/icra/icra2011.html#JeongKSK11
2123823	Takeshi_Sakaguchi,Shinichi_Tsunoo,E._Kubo,Kazuhito_Yokoi,Kazuyoshi_Wada	2010	Intelligent ambience that can lead robot's actions-system design concept and experimental evaluation of intelligent ambience.	db/conf/icra/icra2010.html#SakaguchiTKYW10
2123827	Ewald_Lutscher,Martin_Lawitzky,Gordon_Cheng,Sandra_Hirche	2010	A control strategy for operating unknown constrained mechanisms.	db/conf/icra/icra2010.html#LutscherLCH10
2123831	Mark_de_Berg,Dirk_H._P._Gerrits	2010	Computing push plans for disk-shaped robots.	db/conf/icra/icra2010.html#BergG10
2123853	Naiqi_Wu,Feng_Chu,Chengbin_Chu,MengChu_Zhou	2011	Petri net-based cycle time analysis of dual-arm cluster tools with wafer revisiting and swapping strategy.	db/conf/icra/icra2011.html#WuCCZ11
2123855	mez,Barbara_Caputo	2011	Towards semi-supervised learning of semantic spatial concepts.	db/conf/icra/icra2011.html#Martinez-GomezC11
2123866	Ravi_Balasubramanian,Aaron_M._Dollar	2011	Variation in compliance in two classes of two-link underactuated mechanisms.	db/conf/icra/icra2011.html#BalasubramanianD11a
2123871	Christophe_Cariou,Roland_Lenain,Benoit_Thuilot,Philippe_Martinet	2010	Autonomous maneuver of a farm vehicle with a trailed implement: motion planner and lateral-longitudinal controllers.	db/conf/icra/icra2010.html#CariouLTM10
2123878	Orides_Morandin_Jr.,Vicius_Fernandes_Carida,Edilson_Reis_Rodrigues_Kato,o_de_Souza_Fonseca	2011	A hierarchical fuzzy rule-based building model applied to a AGV dispatching system in an FMS.	db/conf/icra/icra2011.html#MorandinCKF11
2123887	Takaaki_Matsumoto,Koichi_Kita,Ren_Suzuki,Atsushi_Oosedo,Kenta_Go,Yuta_Hoshino,Atsushi_Konno,Masaru_Uchiyama	2010	A hovering control strategy for a tail-sitter VTOL UAV that increases stability against large disturbance.	db/conf/icra/icra2010.html#MatsumotoKSOGHKU10
2123909	Yan-Bin_Jia,Feng_Guo,Jiang_Tian	2011	On two-finger grasping of deformable planar objects.	db/conf/icra/icra2011.html#JiaGT11
2123911	Neil_Dantam,Pushkar_Kolhe,Mike_Stilman	2011	The Motion Grammar for physical human-robot games.	db/conf/icra/icra2011.html#DantamKS11
2123914	HanJin_Lee,Keehoon_Kim,Myoung_Soo_Park,Jong_Hyeon_Park,Sang-Rok_Oh	2012	Verification of a fast training algorithm for multi-channel sEMG classification systems to decode hand configuration.	db/conf/icra/icra2012.html#LeeKPPO12
2123916	Seyed_Abbas_Sadat,Richard_T._Vaughan	2010	Blinkered LOST: Restricting sensor field of view can improve scalability in emergent multi-robot trail following.	db/conf/icra/icra2010.html#SadatV10
2123921	Takeshi_Ando,Yu_Ogawa,Yasutaka_Nakashima,Eiichi_Ohki,Yo_Kobayashi,Misato_Nihei,Masakatsu_G._Fujie	2011	Stable turning movement of a gait-controlled personal mobility "Tread-Walk 1".	db/conf/icra/icra2011.html#AndoONOKNF11
2123923	Paolo_Rocco,Andrea_Maria_Zanchettin	2010	General parameterization of holonomic kinematic inversion algorithms for redundant manipulators.	db/conf/icra/icra2010.html#RoccoZ10
2123934	Damjan_Miklic,Tamara_Petrovic,Mirko_Coric,Zvonimir_Piskovic,Stjepan_Bogdan	2012	A modular control system for warehouse automation - algorithms and simulations in USARSim.	db/conf/icra/icra2012.html#MiklicPCPB12
2123935	Vu_Anh_Huynh,Sertac_Karaman,Emilio_Frazzoli	2012	An incremental sampling-based algorithm for stochastic optimal control.	db/conf/icra/icra2012.html#HuynhKF12
2123941	Kathryn_A._Daltorio,Brian_R._Tietz,John_A._Bender,Victoria_A._Webster,Nicholas_S._Szczecinski,Michael_S._Branicky,Roy_E._Ritzmann,Roger_D._Quinn	2012	A stochastic algorithm for explorative goal seeking extracted from cockroach walking data.	db/conf/icra/icra2012.html#DaltorioTBWSBRQ12
2123946	Hiroshi_Kaminaga,Hirokazu_Tanaka,Kazuki_Yasuda,Yoshihiko_Nakamura	2012	Viscous pump for highly backdrivable Electro-Hydrostatic Actuator.	db/conf/icra/icra2012.html#KaminagaTYN12
2123947	Muhammad_Attamimi,Attamini_Mizutani,Tomoaki_Nakamura,Komei_Sugiura,Takayuki_Nagai,Naoto_Iwahashi,Hiroyuki_Okada,Takashi_Omori	2010	Learning novel objects using out-of-vocabulary word segmentation and object extraction for home assistant robots.	db/conf/icra/icra2010.html#AttamimiMNSNIOO10
2123948	David_Held,Yoram_Yekutieli,Tamar_Flash	2012	Characterizing the stiffness of a multi-segment flexible arm during motion.	db/conf/icra/icra2012.html#HeldYF12
2123949	Gaurab_Basu,Yun_Jiang,Ashutosh_Saxena	2012	Learning to place objects: Organizing a room.	db/conf/icra/icra2012.html#BasuJS12
2123960	ck,Kristin_Ytterstad_Pettersen	2011	Waypoint guidance control of snake robots.	db/conf/icra/icra2011.html#LiljebackP11
2123976	Yizhai_Zhang,Jingliang_Li,Jingang_Yi,Dezhen_Song	2011	Balance control and analysis of stationary riderless motorcycles.	db/conf/icra/icra2011.html#ZhangLYS11
2123988	Adriano_Fagiolini,Felipe_A._W._Belo,Manuel_G._Catalano,Fabio_Bonomo,Simone_Alicino,Antonio_Bicchi	2010	Design and control of a novel 3D casting manipulator.	db/conf/icra/icra2010.html#FagioliniBCBAB10
2123994	Philip_R._Roan,Aaron_Burmeister,Amin_Rahimi,Kevin_Holz,David_Hooper	2010	Real-world validation of three tipover algorithms for mobile robots.	db/conf/icra/icra2010.html#RoanBRHH10
2124010	Bart_Verzijlenberg,Michael_Jenkin	2011	6DOF pose estimation using 3D sensors.	db/conf/icra/icra2011.html#VerzijlenbergJ11
2124011	z_Morales,Simon_Westerberg,Pedro_X._La_Hera,Uwe_Mettin,Leonid_B._Freidovich,Anton_S._Shiriaev	2011	Open-loop control experiments on driver assistance for crane forestry machines.	db/conf/icra/icra2011.html#MoralesWHMFS11
2124018	Leonel_Paredes-Madrid,Pedro_Manuel_Torruella_Naranjo,Paul_Solaeche_Estrada,Ignacio_Galiana,lez_de_Santos	2010	Accurate modeling of low-cost piezoresistive force sensors for haptic interfaces.	db/conf/icra/icra2010.html#Paredes-MadridNEGS10
2124033	Florian_Petit,Maxime_Chalon,Werner_Friedl,Markus_Grebenstein,ffer,Gerd_Hirzinger	2010	Implementation.	db/conf/icra/icra2010.html#PetitCFGAH10
2124040	pez-Franco,Nancy_Arana-Daniel,Eduardo_Bayro-Corrochano	2010	Vision-based robot control with omnidirectional cameras and conformal geometric algebra.	db/conf/icra/icra2010.html#Lopez-FrancoAB10
2124047	Jens_Windau,Wei-Min_Shen	2010	An Inertia-Based Surface Identification System.	db/conf/icra/icra2010.html#WindauS10
2124061	Tobias_Bellmann,Johann_Heindl,Matthias_Hellerer,Richard_Kuchar,Karan_Sharma,Gerd_Hirzinger	2011	The DLR Robot Motion Simulator Part I: Design and setup.	db/conf/icra/icra2011.html#BellmannHHKSH11
2124070	Hiroaki_Fukushima,Satoru_Shinmura,Fumitoshi_Matsuno	2011	Transformation control to an inverted pendulum mode of a mobile robot with wheel-arms using partial linearization.	db/conf/icra/icra2011.html#FukushimaSM11
2124081	Hyunwoo_Kim,Sukhan_Lee	2010	A novel line matching method based on intersection context.	db/conf/icra/icra2010.html#KimL10
2124094	Jae-Sung_Moon,Mark_W._Spong	2010	Bifurcations and chaos in passive walking of a compass-gait biped with asymmetries.	db/conf/icra/icra2010.html#MoonS10
2124105	Keisuke_Nakamura,Shigeki_Nakaura,Mitsuji_Sampei	2010	Control of bipedal running by the angular-momentum-based synchronization structure.	db/conf/icra/icra2010.html#NakamuraNS10
2124130	Teresa_A._Vidal-Calleja,Gabriel_Agammenoni	2012	Integrated probabilistic generative model for detecting smoke on visual images.	db/conf/icra/icra2012.html#Vidal-CallejaA12
2124134	Rohan_Paul,Paul_M._Newman	2011	Self help: Seeking out perplexing images for ever improving navigation.	db/conf/icra/icra2011.html#PaulN11
2124135	Xiaobo_Tan,Michael_Carpenter,John_Thon,Freddie_Alequin-Ramos	2010	Analytical modeling and experimental studies of robotic fish turning.	db/conf/icra/icra2010.html#TanCTA10
2124143	Pauline_Merveilleux,Ouiddad_Labbani-Igbida,El_Mustapha_Mouaddib	2011	Real-time free space detection and navigation using omnidirectional vision and parametric and geometric active contours.	db/conf/icra/icra2011.html#MerveilleuxLM11
2124162	Carlos_J._Rosales,rez,Marco_Gabiccini,Antonio_Bicchi	2012	On the synthesis of feasible and prehensile robotic grasps.	db/conf/icra/icra2012.html#RosalesSGB12
2124168	Yahya_S._Khaligh,Mehrzad_Namvar	2010	Adaptive control of robot manipulators including actuator dynamics and without joint torque measurement.	db/conf/icra/icra2010.html#KhalighN10
2124169	Paolo_Salaris,Lucia_Pallottino,Antonio_Bicchi	2011	Shortest paths with side sensors.	db/conf/icra/icra2011.html#SalarisPB11
2124174	Pinyo_Puangmali,Prokar_Dasgupta,Lakmal_D._Seneviratne,Kaspar_Althoefer	2010	Miniaturized triaxial optical fiber force sensor for MRI-Guided minimally invasive surgery.	db/conf/icra/icra2010.html#PuangmaliDSA10
2124177	Kurt_Konolige,Eitan_Marder-Eppstein,Bhaskara_Marthi	2011	Navigation in hybrid metric-topological maps.	db/conf/icra/icra2011.html#KonoligeMM11
2124186	Amanda_Prorok,Lukas_Gonon,Alcherio_Martinoli	2012	Online model estimation of ultra-wideband TDOA measurements for mobile robot localization.	db/conf/icra/icra2012.html#ProrokGM12
2124192	Gabriel_Agamennoni,Juan_I._Nieto,Eduardo_Mario_Nebot	2010	Robust and accurate road map inference.	db/conf/icra/icra2010.html#AgamennoniNN10
2124201	Krishna_Kumar_Narayanan,Luis-Felipe_Posada,Frank_Hoffmann,Torsten_Bertram	2011	Scenario and context specific visual robot behavior learning.	db/conf/icra/icra2011.html#NarayananPHB11
2124235	Norimitsu_Sakagami,Mizuho_Shibata,Sadao_Kawamura,Toshifumi_Inoue,Hiroyuki_Onishi,Shigeo_Murakami	2010	An attitude control system for underwater vehicle-manipulator systems.	db/conf/icra/icra2010.html#SakagamiSKIOM10
2124236	Erol_Ozgur,Nicolas_Andreff,Philippe_Martinet	2010	Vector-based dynamic modeling and control of the Quattro parallel robot by means of leg orientations.	db/conf/icra/icra2010.html#OzgurAM10
2124241	Mahmut_Selman_Sakar,Edward_B._Steager,Anthony_Cowley,Vijay_Kumar_0001,George_J._Pappas	2011	Wireless manipulation of single cells using magnetic microtransporters.	db/conf/icra/icra2011.html#SakarSCKP11
2124242	Chuantao_Zang,Koichi_Hashimoto	2012	A flexible visual inspection system combining pose estimation and visual servo approaches.	db/conf/icra/icra2012.html#ZangH12
2124258	Qingsong_Xu,Yangmin_Li	2011	Modeling and control of rate-dependent hysteresis for a piezo-driven micropositioning stage.	db/conf/icra/icra2011.html#XuL11
2124263	Nick_Hawes,Marc_Hanheide,Jack_Hargreaves,Ben_Page,Hendrik_Zender,Patric_Jensfelt	2011	Home alone: Autonomous extension and correction of spatial representations.	db/conf/icra/icra2011.html#HawesHHPZJ11
2124275	Michael_J._Gielniak,C._Karen_Liu,Andrea_Lockerd_Thomaz	2011	Task-aware variations in robot motion.	db/conf/icra/icra2011.html#GielniakLT11
2124287	Eric_Sommerlade,Ben_Benfold,Ian_D._Reid_0001	2011	Gaze directed camera control for face image acquisition.	db/conf/icra/icra2011.html#SommerladeBR11
2124294	Cristian_A._Castro,Sara_Smith,Adham_Alqassis,Thomas_Ketterl,Yu_Sun_0004,Sharona_Ross,Alexander_Rosemurgy,Peter_P._Savage,Richard_D._Gitlin	2012	MARVEL: A wireless Miniature Anchored Robotic Videoscope for Expedited Laparoscopy.	db/conf/icra/icra2012.html#CastroSAKSRRSG12
2124296	Seung-kook_Yun,Daniela_Rus	2010	Adaptation to robot failures and shape change in decentralized construction.	db/conf/icra/icra2010.html#YunR10
2124299	Nicolas_Hudson,Thomas_Howard,Jeremy_Ma,Abhinandan_Jain,Max_Bajracharya,Steven_Myint,Calvin_Kuo,Larry_H._Matthies,Paul_Backes,Paul_Hebert,Thomas_J._Fuchs,Joel_W._Burdick	2012	End-to-end dexterous manipulation with deliberate interactive estimation.	db/conf/icra/icra2012.html#HudsonHMJBMKMBHFB12
2124301	Edwin_Olson	2011	On computing the average orientation of vectors and lines.	db/conf/icra/icra2011.html#Olson11a
2124324	Panagiotis_K._Artemiadis,Pantelis_T._Katsiaris,Minas_V._Liarokapis,Kostas_J._Kyriakopoulos	2011	On the effect of human arm manipulability in 3D force tasks: Towards force-controlled exoskeletons.	db/conf/icra/icra2011.html#ArtemiadisKLK11
2124332	Kai_Welke,Jan_Issac,David_Schiebener,Tamim_Asfour,diger_Dillmann	2010	Autonomous acquisition of visual multi-view object representations for object recognition on a humanoid robot.	db/conf/icra/icra2010.html#WelkeISAD10
2124338	Van_Anh_Ho,Shinichi_Hirai	2011	Three-dimensional modeling and simulation of the sliding motion of a soft fingertip with friction, focusing on stick-slip transition.	db/conf/icra/icra2011.html#HoH11
2124343	Lorenz_Meier,Petri_Tanskanen,Friedrich_Fraundorfer,Marc_Pollefeys	2011	PIXHAWK: A system for autonomous flight using onboard computer vision.	db/conf/icra/icra2011.html#MeierTFP11
2124344	Cyrille_Lenders,l_Gauthier,Pierre_Lambert	2011	Parallel microrobot actuated by capillary effects.	db/conf/icra/icra2011.html#LendersGL11
2124345	Eric_A._Antonelo,Benjamin_Schrauwen	2010	Supervised learning of internal models for autonomous goal-oriented robot navigation using Reservoir Computing.	db/conf/icra/icra2010.html#AntoneloS10
2124367	Yun_Lin,Yu_Sun_0004	2011	5-D force control system for fingernail imaging calibration.	db/conf/icra/icra2011.html#LinS11
2124371	Chen-Tun_Chou,Jiun-Yi_Li,Ming-Fang_Chang,Li-Chen_Fu	2011	Multi-robot cooperation based human tracking system using Laser Range Finder.	db/conf/icra/icra2011.html#ChouLCF11
2124385	Chi_Hay_Tong,Timothy_D._Barfoot	2011	A self-calibrating 3D ground-truth localization system using retroreflective landmarks.	db/conf/icra/icra2011.html#TongB11a
2124386	Bogdan_Moldovan,Plinio_Moreno,Martijn_van_Otterlo,Santos-Victor,Luc_De_Raedt	2012	Learning relational affordance models for robots in multi-object manipulation tasks.	db/conf/icra/icra2012.html#MoldovanMOSR12
2124391	Nikolas_Trawny,Stergios_I._Roumeliotis	2010	On the global optimum of planar, range-based robot-to-robot relative pose estimation.	db/conf/icra/icra2010.html#TrawnyR10
2124400	Sachin_Chitta,Benjamin_J._Cohen,Maxim_Likhachev	2010	Planning for autonomous door opening with a mobile manipulator.	db/conf/icra/icra2010.html#ChittaCL10
2124419	Andrea_Cherubini,Fabien_Spindler,ois_Chaumette	2012	A new tentacles-based technique for avoiding obstacles during visual navigation.	db/conf/icra/icra2012.html#CherubiniSC12
2124421	Pratap_Tokekar,Nikhil_Karnad,Volkan_Isler	2011	Energy-optimal velocity profiles for car-like robots.	db/conf/icra/icra2011.html#TokekarKI11
2124422	Georgios_Rekleitis,Evangelos_Papadopoulos	2010	Towards passive object on-orbit manipulation by cooperating free-flying robots.	db/conf/icra/icra2010.html#RekleitisP10
2124424	Jnaneshwar_Das,Kanna_Rajan,Sergey_Frolov,Frederic_Py,John_P._Ryan,David_A._Caron,Gaurav_S._Sukhatme	2010	Towards marine bloom trajectory prediction for AUV mission planning.	db/conf/icra/icra2010.html#DasRFPRCS10
2124431	Alexandre_Lecours,Boris_Mayer_St-Onge,ment_Gosselin	2012	Variable admittance control of a four-degree-of-freedom intelligent assist device.	db/conf/icra/icra2012.html#LecoursSG12
2124436	Lionel_Ott,Fabio_Ramos	2012	Unsupervised incremental learning for long-term autonomy.	db/conf/icra/icra2012.html#OttR12
2124444	Markus_Deittert,Arthur_Richards,George_Mathews	2010	Receding Horizon Control in unknown environments: Experimental results.	db/conf/icra/icra2010.html#DeittertRM10
2124447	Thilo_Grundmann,Wendelin_Feiten,Georg_von_Wichert	2011	A Gaussian measurement model for local interest point based 6 DOF pose estimation.	db/conf/icra/icra2011.html#GrundmannFW11
2124450	Stephan_Weiss,Markus_Achtelik,Simon_Lynen,Margarita_Chli,Roland_Siegwart	2012	Real-time onboard visual-inertial state estimation and self-calibration of MAVs in unknown environments.	db/conf/icra/icra2012.html#WeissALCS12
2124456	Markus_Schwienbacher,Thomas_Buschmann,Sebastian_Lohmeier,Valerio_Favot,Heinz_Ulbrich	2011	Self-collision avoidance and angular momentum compensation for a biped humanoid robot.	db/conf/icra/icra2011.html#SchwienbacherBLFU11
2124457	Qi_Wu,Wende_Zhang,B._V._K._Vijaya_Kumar	2012	Strong shadow removal via patch-based shadow edge detection.	db/conf/icra/icra2012.html#WuZK12
2124460	bal_Ollero,Konstantin_Kondak,E._Previnaire,Ivan_Maza,Fernando_Caballero,Markus_Bernard,J._Ramiro_Martinez_de_Dios,n,Klaus_Herrmann,Lodewijk_van_Hoesel,Jason_Lepley,s	2010	Integration of aerial robots and wireless sensor and actuator networks. The AWARE project.	db/conf/icra/icra2010.html#OlleroKPMCBMMHHLA10
2124462	A._Dominik_Haumann,Andreas_Breitenmoser,Volker_Willert,Kim_D._Listmann,Roland_Siegwart	2011	DisCoverage for non-convex environments with arbitrary obstacles.	db/conf/icra/icra2011.html#HaumannBWLS11
2124480	Vitor_Guizilini,Fabio_Ramos	2012	Semi-parametric models for visual odometry.	db/conf/icra/icra2012.html#GuiziliniR12
2124498	Francesco_Chinello,Stefano_Scheggi,Fabio_Morbidi,Domenico_Prattichizzo	2010	KCT: a MATLAB toolbox for motion control of KUKA robot manipulators.	db/conf/icra/icra2010.html#ChinelloSMP10
2124499	Bertrand_Douillard,James_Patrick_Underwood,Noah_Kuntz,Vsevolod_Vlaskine,Alastair_James_Quadros,Peter_Morton,Alon_Frenkel	2011	On the segmentation of 3D LIDAR point clouds.	db/conf/icra/icra2011.html#DouillardUKVQMF11
2124508	Wei_Feng,Li_Zheng,Jingshan_Li	2012	The robustness of scheduling policies in multi-product manufacturing systems with sequence-dependent setup times and finite buffers.	db/conf/icra/icra2012.html#FengZL12
2124539	Chris_Slaughter,Allen_Y._Yang,Justin_Bagwell,Costa_Checkles,Luis_Sentis,Sriram_Vishwanath	2012	Sparse online low-rank projection and outlier rejection (SOLO) for 3-D rigid-body motion registration.	db/conf/icra/icra2012.html#SlaughterYBCSV12
2124561	Antonio_Franchi,Paolo_Robuffo_Giordano,Cristian_Secchi,Hyoung_Il_Son,lthoff	2011	A passivity-based decentralized approach for the bilateral teleoperation of a group of UAVs with switching topology.	db/conf/icra/icra2011.html#FranchiGSSB11
2124580	rio_Richa,nio_Padilha_Lanari_Bo,Philippe_Poignet	2010	Beating heart motion prediction for robust visual tracking.	db/conf/icra/icra2010.html#RichaBP10
2124589	Ismail_Uyanik,Uluc_Saranli,Omer_Morgul	2011	Adaptive control of a spring-mass hopper.	db/conf/icra/icra2011.html#UyanikSM11
2124590	Peter_Henry,Christian_Vollmer,Brian_Ferris,Dieter_Fox	2010	Learning to navigate through crowded environments.	db/conf/icra/icra2010.html#HenryVFF10
2124602	Estelle_Courtial,Matthieu_Fruchard,Guillaume_Allibert	2012	Predictive control of chained systems: A necessary condition on the control horizon.	db/conf/icra/icra2012.html#CourtialFA12
2124608	Tim_Bailey,Mitch_Bryson,Hua_Mu,John_Vial,Lachlan_McCalman,Hugh_F._Durrant-Whyte	2011	Decentralised cooperative localisation for heterogeneous teams of mobile robots.	db/conf/icra/icra2011.html#BaileyBMVMD11
2124611	A._Dominik_Haumann,Kim_D._Listmann,Volker_Willert	2010	DisCoverage: A new paradigm for multi-robot exploration.	db/conf/icra/icra2010.html#HaumannLW10
2124613	Jacob_Jay_Thomson,Andrew_Evan_Graham	2011	Efficient scheduling for multiple automated non-holonomic vehicles using a Coordinated Path Planner.	db/conf/icra/icra2011.html#ThomsonG11
2124621	KeJun_Ning,Tomas_Kulvicius,Minija_Tamosiunaite,tter	2011	Accurate position and velocity control for trajectories based on dynamic movement primitives.	db/conf/icra/icra2011.html#NingKTW11
2124626	Wenda_Xu,Wen_ZhaYao,Huijing_Zhao,Hongbin_Zha	2011	A vehicle model for micro-traffic simulation in dynamic urban scenarios.	db/conf/icra/icra2011.html#XuZZZ11
2124628	Rafael_Valencia,Juan_Andrade-Cetto,Josep_M._Porta	2011	Path planning in belief space with pose SLAM.	db/conf/icra/icra2011.html#ValenciaAP11
2124631	Rosario_Aragues,Luca_Carlone,Giuseppe_Carlo_Calafiore,s	2011	Multi-agent localization from noisy relative pose measurements.	db/conf/icra/icra2011.html#AraguesCCS11
2124642	Weiguang_Huo,Jian_Huang,Yongji_Wang,Jun_Wu,Lei_Cheng	2011	Control of upper-limb power-assist exoskeleton based on motion intention recognition.	db/conf/icra/icra2011.html#HuoHWWC11
2124649	Joris_De_Schutter,Enrico_Di_Lello,Jochem_F._M._De_Schutter,Roel_Matthysen,Tuur_Benoit,Tinne_De_Laet	2011	Recognition of 6 DOF rigid body motion trajectories using a coordinate-free representation.	db/conf/icra/icra2011.html#SchutterLSMBL11
2124653	Umashankar_Nagarajan,Byungjun_Kim,Ralph_L._Hollis	2012	Planning in high-dimensional shape space for a single-wheeled balancing mobile robot with arms.	db/conf/icra/icra2012.html#NagarajanKH12
2124657	Tao_Yue,Masahiro_Nakajima,Masaru_Kojima,Toshio_Fukuda	2012	High speed cell patterning by dielectrophoresis and on-chip fabrication of microstructure embedding patterned cells.	db/conf/icra/icra2012.html#YueNKF12
2124672	Mikhail_M._Svinin,Akihiro_Morinaga,Motoji_Yamamoto	2012	On the dynamic model and motion planning for a class of spherical rolling robots.	db/conf/icra/icra2012.html#SvininMY12
2124673	Colin_McManus,Paul_Timothy_Furgale,Timothy_D._Barfoot	2011	Towards appearance-based methods for lidar sensors.	db/conf/icra/icra2011.html#McManusFB11
2124675	Jonathan_Scholz,Sachin_Chitta,Bhaskara_Marthi,Maxim_Likhachev	2011	Cart pushing with a mobile manipulation system: Towards navigation with moveable objects.	db/conf/icra/icra2011.html#ScholzCML11
2124679	Kenichi_Narioka,Koh_Hosoda	2011	Motor development of an pneumatic musculoskeletal infant robot.	db/conf/icra/icra2011.html#NariokaH11
2124683	Edwin_Dertien,Stefano_Stramigioli	2011	Basic maneuvers for an inspection robot for small diameter gas distribution mains.	db/conf/icra/icra2011.html#DertienS11
2124704	Patrick_Grosch,Raffaele_Di_Gregorio,pez,Federico_Thomas	2010	Motion planning for a novel reconfigurable parallel manipulator with lockable revolute joints.	db/conf/icra/icra2010.html#GroschGLT10
2124707	Antonello_Scalmato,Antonio_Sgorbissa,Renato_Zaccaria	2012	Describing and classifying spatial and temporal contexts with OWL DL in Ubiquitous Robotics.	db/conf/icra/icra2012.html#ScalmatoSZ12
2124709	Ken_Masuya,Tomomichi_Sugihara,Motoji_Yamamoto	2012	Design of complementary filter for high-fidelity attitude estimation based on sensor dynamics compensation with decoupled properties.	db/conf/icra/icra2012.html#MasuyaSY12
2124711	Sven_Olufs,Markus_Vincze	2011	Robust single view room structure segmentation in Manhattan-like environments from stereo vision.	db/conf/icra/icra2011.html#OlufsV11
2124718	Mats_Isaksson	2011	A family of planar parallel manipulators.	db/conf/icra/icra2011.html#Isaksson11
2124723	Satoshi_Miura,Yo_Kobayashi,Masatoshi_Seki,Takehiko_Noguchi,Masahiro_Kasuya,Yuki_Yokoo,Masakatsu_G._Fujie	2012	Intuitive operability evaluation of robotic surgery using brain activity measurement to identify hand-eye coordination.	db/conf/icra/icra2012.html#MiuraKSNKYF12
2124726	Hao-Hsueh_Wang,Andreas_Dopfer,Chieh-Chih_Wang	2012	3D AAM based face alignment under wide angular variations using 2D and 3D data.	db/conf/icra/icra2012.html#WangDW12
2124735	Martin_Weser,Dominik_Off,Jianwei_Zhang_0001	2010	HTN robot planning in partially observable dynamic environments.	db/conf/icra/icra2010.html#WeserOZ10
2124756	David_Ribas,Pere_Ridao,Angelos_Mallios,s_Palomeras	2012	Delayed state information filter for USBL-Aided AUV navigation.	db/conf/icra/icra2012.html#RibasRMP12
2124766	Ryuta_Ozawa,ois_Chaumette	2011	Dynamic visual servoing with image moments for a quadrotor using a virtual spring approach.	db/conf/icra/icra2011.html#OzawaC11
2124785	Samuel_Okodi,Xin_Jiang,Satoko_Abiko,Atsushi_Konno,Masaru_Uchiyama	2010	Intuitive human skill reconstruction for compliance control.	db/conf/icra/icra2010.html#OkodiJAKU10
2124786	Jadav_Das,Nilanjan_Sarkar	2010	Planning and control of an internal point of a deformable object.	db/conf/icra/icra2010.html#DasS10
2124792	Sanghyun_Joung,Hongen_Liao,Etsuko_Kobayashi,Mamoru_Mitsuishi,Yoshikazu_Nakajima,Nobuhiko_Sugano,Masahiko_Bessho,Satoru_Ohashi,Takuya_Matsumoto,Isao_Ohnishi,Ichiro_Sakuma	2010	Hazard analysis of fracture-reduction robot and its application to safety design of fracture-reduction assisting robotic system.	db/conf/icra/icra2010.html#JoungLKMNSBOMOS10
2124797	Tong_Tao,Stephen_Tully,George_Kantor,Howie_Choset	2011	Incremental construction of the saturated-GVG for multi-hypothesis topological SLAM.	db/conf/icra/icra2011.html#TaoTKC11
2124806	Jaime_Pulido_Fentanes,Eduardo_Zalama_Casanova,a-Bermejo	2011	Algorithm for efficient 3D reconstruction of outdoor environments using mobile robots.	db/conf/icra/icra2011.html#FentanesCG11
2124809	Lorenzo_Jamone,Matteo_Fumagalli,Giorgio_Metta,Lorenzo_Natale,Francesco_Nori,Giulio_Sandini	2010	Machine-learning based control of a human-like tendon-driven neck.	db/conf/icra/icra2010.html#JamoneFMNNS10
2124812	Amir_Degani,Howie_Choset,Matthew_T._Mason	2010	DSAC - Dynamic, Single Actuated Climber: Local stability and bifurcations.	db/conf/icra/icra2010.html#DeganiCM10
2124815	Masatsugu_Otsuki	2010	Flexible space robotic manipulator with passively switching free joint to drive joint.	db/conf/icra/icra2010.html#Otsuki10
2124819	Christoph_Sprunk,Boris_Lau,Patrick_Pfaff,Wolfram_Burgard	2011	Online generation of kinodynamic trajectories for non-circular omnidirectional robots.	db/conf/icra/icra2011.html#SprunkLPB11
2124828	Vineet_Gandhi,Jan_Cech,Radu_Horaud	2012	High-resolution depth maps based on TOF-stereo fusion.	db/conf/icra/icra2012.html#GandhiCH12
2124831	Johannes_Lemburg,Jose_de_Gea_Fernandez,Markus_Eich,Dennis_Mronga,Peter_Kampmann,Andreas_Vogt_0002,Achint_Aggarwal,Yuping_Shi,Frank_Kirchner	2011	AILA - design of an autonomous mobile dual-arm robot.	db/conf/icra/icra2011.html#LemburgFEMKVASK11
2124834	Yuan_Liu,Nazih_Mechbal,Jean-Pierre_Nikolovski,Moustapha_Hafez,Ã©	2011	Thin shell tactile sensing by acoustic wave diffraction patterns.	db/conf/icra/icra2011.html#LiuMNHV11
2124838	Fabrizio_Flacco,Alessandro_De_Luca_0001	2011	Residual-based stiffness estimation in robots with flexible transmissions.	db/conf/icra/icra2011.html#FlaccoL11
2124841	Jeffrey_N._Twigg,Jonathan_R._Fink,Paul_L._Yu,Brian_M._Sadler	2012	RSS gradient-assisted frontier exploration and radio source localization.	db/conf/icra/icra2012.html#TwiggFYS12
2124845	Jia_Pan,Sachin_Chitta,Dinesh_Manocha	2012	FCL: A general purpose library for collision and proximity queries.	db/conf/icra/icra2012.html#PanCM12
2124850	Daniel_Nyga,Moritz_Tenorth,Michael_Beetz	2011	How-models of human reaching movements in the context of everyday manipulation activities.	db/conf/icra/icra2011.html#NygaTB11
2124859	Junwen_Wang,Jingshan_Li,Jorge_Arinez,Stephan_Biller	2010	Quality bottleneck transitions in flexible manufacturing systems.	db/conf/icra/icra2010.html#WangLAB10
2124862	Bastian_Steder,Giorgio_Grisetti,Wolfram_Burgard	2010	Robust place recognition for 3D range data based on point features.	db/conf/icra/icra2010.html#StederGB10
2124866	Luis_Puig,dez,s_Guerrero	2010	Self-orientation of a hand-held catadioptric system in man-made environments.	db/conf/icra/icra2010.html#PuigBG10
2124882	Jianmin_Li,Shuxin_Wang,Xiaofei_Wang,Lin'an_Zhang	2011	Setup optimization for MIS robots with two-passive joints.	db/conf/icra/icra2011.html#LiWWZ11
2124885	Sven_Gestegard_Robertz,Lorenz_Halt,Sameer_Kelkar,Klas_Nilsson,Anders_Robertsson,Dominique_Schar,Johannes_Schiffer	2010	Precise robot motions using dual motor control.	db/conf/icra/icra2010.html#RobertzHKNRSS10
2124896	Edouard_Laroche,Shingo_Kagami,c_Cuvillon	2011	Hybrid Kalman filter for improvement of camera-based position sensor.	db/conf/icra/icra2011.html#LarocheKC11
2124904	Marek_Sewer_Kopicki,Sebastian_Zurek,Rustam_Stolkin,Thomas_Morwald,Jeremy_L._Wyatt	2011	Learning to predict how rigid objects behave under simple manipulation.	db/conf/icra/icra2011.html#KopickiZSMW11
2124911	Joseph_Knuth,Prabir_Barooah	2012	Collaborative 3D localization of robots from relative pose measurements using gradient descent on manifolds.	db/conf/icra/icra2012.html#KnuthB12
2124922	Xia_Liu,Mahdi_Tavakoli	2011	Inverse dynamics-based adaptive control of nonlinear bilateral teleoperation systems.	db/conf/icra/icra2011.html#LiuT11
2124923	Greg_Droge,Magnus_Egerstedt	2012	Optimal decentralized gait transitions for snake robots.	db/conf/icra/icra2012.html#DrogeE12
2124927	Andrea_Simonetto,s_Keviczky,Robert_Babuska	2010	Distributed nonlinear estimation for robot localization using weighted consensus.	db/conf/icra/icra2010.html#SimonettoKB10
2124932	Carlo_Masone,Paolo_Robuffo_Giordano,lthoff	2011	Mechanical design and control of the new 7-DOF CyberMotion simulator.	db/conf/icra/icra2011.html#MasoneGB11
2124935	re,Daniel_Sidobre,Khoi_Nguyen	2010	From motion planning to trajectory control with bounded jerk for service manipulator robots.	db/conf/icra/icra2010.html#BroquereSN10
2124942	Seyed_Mohammad_Khansari-Zadeh,Aude_Billard	2010	BM: An iterative algorithm to learn stable non-linear dynamical systems with Gaussian mixture models.	db/conf/icra/icra2010.html#Khansari-ZadehB10
2124947	Hyeun_Jeong_Min,Nikolaos_Papanikolopoulos	2011	The multi-robot coverage problem for optimal coordinated search with an unknown number of robots.	db/conf/icra/icra2011.html#MinP11
2124952	Jose_Nunez-Varela,Balaraman_Ravindran,Jeremy_L._Wyatt	2012	Where do i look now? Gaze allocation during visually guided manipulation.	db/conf/icra/icra2012.html#Nunez-VarelaRW12
2124957	Yong_Wang,Weidong_Chen	2011	Hybrid map-based navigation for intelligent wheelchair.	db/conf/icra/icra2011.html#WangC11
2124975	Zhe_Xu,Robert_Fitch,Salah_Sukkarieh	2012	Learning utility models for decentralised coordinated target tracking.	db/conf/icra/icra2012.html#XuFS12
2124976	Bingtuan_Gao,Ning_Xi,Yantao_Shen,Jianguo_Zhao,Ruiguo_Yang	2010	Development of a low motion-noise humanoid neck: Statics analysis and experimental validation.	db/conf/icra/icra2010.html#GaoXSZY10
2124984	Carlos_Rafael_Tercero_Villagran,Masahiro_Kojima,Seiichi_Ikeda,Katsutoshi_Ooe,Toshio_Fukuda,Fumihito_Arai,Makoto_Negoro,Ikuo_Takahashi,Guiryong_Kwon	2012	Stress analysis during micro-coil deployment in membranous model of saccular aneurysm with bleb.	db/conf/icra/icra2012.html#VillagranKIOFANTK12
2124990	Chao_Wu,Xin-Jun_Liu,Fugui_Xie,Jinsong_Wang	2011	New measure for 'Closeness' to singularities of parallel robots.	db/conf/icra/icra2011.html#WuLXW11
2125006	Daniel_Mellinger,Vijay_Kumar_0001	2011	Minimum snap trajectory generation and control for quadrotors.	db/conf/icra/icra2011.html#MellingerK11
2125009	Jens-Steffen_Gutmann,Gabriel_Brisson,Ethan_Eade,Philip_Fong,Mario_E._Munich	2010	Vector field SLAM.	db/conf/icra/icra2010.html#GutmannBEFM10
2125018	Tommaso_Lenzi,Nicola_Vitiello,Stefano_Marco_Maria_De_Rossi,Stefano_Roccella,Fabrizio_Vecchi,Maria_Chiara_Carrozza	2011	NEUROExos: A variable impedance powered elbow exoskeleton.	db/conf/icra/icra2011.html#LenziVRRVC11
2125023	Liang_Gong,Chengliang_Liu	2011	Electrode displacement patterns inferred as the optimal control criteria during the resistance spot welding process.	db/conf/icra/icra2011.html#GongL11
2125024	Colin_Ho,Andres_Mora,Srikanth_Saripalli	2012	An evaluation of sampling path strategies for an autonomous underwater vehicle.	db/conf/icra/icra2012.html#HoMS12
2125029	Benjamin_Pitzer,ren_Kammel,Charles_DuHadway,Jan_Becker	2010	Automatic reconstruction of textured 3D models.	db/conf/icra/icra2010.html#PitzerKDB10
2125054	Riccardo_Falconi,Sven_Gowal,Alcherio_Martinoli	2010	Graph based distributed control of non-holonomic vehicles endowed with local positioning information engaged in escorting missions.	db/conf/icra/icra2010.html#FalconiGM10
2125057	Federico_Parietti,Hartmut_Geyer	2011	Reactive balance control in walking based on a bipedal linear inverted pendulum model.	db/conf/icra/icra2011.html#PariettiG11
2125061	Jungsik_Kim,Dongjune_Chang,Hamid_Ladjal,David_Folio,Antoine_Ferreira,Jung_Kim	2011	Evaluation of telerobotic shared control for efficient manipulation of single-cells in microinjection.	db/conf/icra/icra2011.html#KimCLFFK11
2125067	Boris_Sofman,James_A._Bagnell,Anthony_Stentz	2010	Anytime online novelty detection for vehicle safeguarding.	db/conf/icra/icra2010.html#SofmanBS10
2125078	Cristian_Secchi,Antonio_Franchi,lthoff,Paolo_Robuffo_Giordano	2012	Bilateral teleoperation of a group of UAVs with communication delays and switching topology.	db/conf/icra/icra2012.html#SecchiFBG12
2125088	Pieter_van_Zutven,Dragan_Kostic,Henk_Nijmeijer	2012	Foot placement for planar bipeds with point feet.	db/conf/icra/icra2012.html#ZutvenKN12
2125110	Francesco_Di_Corato,Lorenzo_Pollini,Mario_Innocenti,Giovanni_Indiveri	2011	An Entropy-like approach to vision based autonomous navigation.	db/conf/icra/icra2011.html#CoratoPII11
2125120	Tomonari_Furukawa,Benjamin_Lavis,Hugh_F._Durrant-Whyte	2010	Parallel grid-based recursive Bayesian estimation using GPU for real-time autonomous navigation.	db/conf/icra/icra2010.html#FurukawaLD10
2125126	Ryan_N._Smith,Mac_Schwager,Stephen_L._Smith,Daniela_Rus,Gaurav_S._Sukhatme	2011	Persistent ocean monitoring with underwater gliders: Towards accurate reconstruction of dynamic ocean processes.	db/conf/icra/icra2011.html#SmithSSRS11
2125150	Juan_Alvaro_Gallego,Eduardo_Rocon_de_Lima,Jens_Luis_Pons	2010	Estimation of instantaneous tremor parameters for FES-based tremor suppression.	db/conf/icra/icra2010.html#GallegoRP10
2125170	Rami_Alazrai,C._S._George_Lee	2012	A connectionist-based approach for human action identification.	db/conf/icra/icra2012.html#AlazraiL12
2125176	Morteza_Farrokhsiar,Homayoun_Najjaran	2012	An unscented model predictive control approach to the formation control of nonholonomic mobile robots.	db/conf/icra/icra2012.html#FarrokhsiarN12
2125193	Lars_Kunze,Tobias_Roehm,Michael_Beetz	2011	Towards semantic robot description languages.	db/conf/icra/icra2011.html#KunzeRB11
2125209	Tian_Li,Kui_Sun,Yue_Jin,Hong_Liu	2011	A novel optimal calibration algorithm on a dexterous 6 DOF serial robot-with the optimization of measurement poses number.	db/conf/icra/icra2011.html#LiSJL11
2125223	Vincent_Crocher,Ã©,Anis_Sahbani,s_Roby-Brami,Guillaume_Morel	2011	Changing human upper-limb synergies with an exoskeleton using viscous fields.	db/conf/icra/icra2011.html#CrocherJSRM11
2125237	Amir_Jafari,Nikolaos_G._Tsagarakis,Irene_Sardellitti,Darwin_G._Caldwell	2012	How design can affect the energy required to regulate the stiffness in variable stiffness actuators.	db/conf/icra/icra2012.html#JafariTSC12
2125240	Ellips_Masehian,Azadeh_Hassan_Nejad	2010	A hierarchical decoupled approach for multi robot motion planning on trees.	db/conf/icra/icra2010.html#MasehianN10
2125249	Ethan_Stump,Nathan_Michael,Vijay_Kumar_0001,Volkan_Isler	2011	Visibility-based deployment of robot formations for communication maintenance.	db/conf/icra/icra2011.html#StumpMKI11
2125252	Martin_J._Schuster,Dominik_Jain,Moritz_Tenorth,Michael_Beetz	2012	Learning organizational principles in human environments.	db/conf/icra/icra2012.html#SchusterJTB12
2125254	Keng_Peng_Tee,Rui_Yan,Haizhou_Li	2010	Adaptive admittance control of a robot manipulator under task space constraint.	db/conf/icra/icra2010.html#TeeYL10
2125267	Shervin_Javdani,Sameep_Tandon,Jie_Tang,James_F._O'Brien,Pieter_Abbeel	2011	Modeling and perception of deformable one-dimensional objects.	db/conf/icra/icra2011.html#JavdaniTTOA11
2125274	Chao-Chieh_Lan,Jhe-Hong_Wang,Yi-Ho_Chen	2010	A compliant constant-force mechanism for adaptive robot end-effector operations.	db/conf/icra/icra2010.html#LanWC10
2125276	Dana_E._Vogtmann,Satyandra_K._Gupta,Sarah_Bergbreiter	2011	Multi-material compliant mechanisms for mobile millirobots.	db/conf/icra/icra2011.html#VogtmannGB11
2125286	Rob_Reilink,Stefano_Stramigioli,Sarthak_Misra	2012	Image-based pose estimation of an endoscopic instrument.	db/conf/icra/icra2012.html#ReilinkSM12a
2125311	Hamidreza_Azimian,Rajni_V._Patel,Michael_D._Naish,Bob_Kiaii	2011	A framework for preoperative planning of robotics-assisted minimally invasive cardiac surgery (RAMICS) under geometric uncertainty.	db/conf/icra/icra2011.html#AzimianPNK11
2125314	Agathe_Koller-Hodac,Daniel_Peter_Germann,Alexander_Gilgen,Katja_Dietrich,Maik_Hadorn,Wolfgang_Schatz,Peter_Eggenberger_Hotz	2010	Actuated bivalve robot study of the burrowing locomotion in sediment.	db/conf/icra/icra2010.html#Koller-HodacGGDHSH10
2125324	Min_Tang,Young_J._Kim,Dinesh_Manocha	2010	Continuous collision detection for non-rigid contact computations using local advancement.	db/conf/icra/icra2010.html#TangKM10
2125357	Isuru_S._Godage,David_T._Branson,Emanuele_Guglielmino,Gustavo_A._Medrano-Cerda,Darwin_G._Caldwell	2011	Shape function-based kinematics and dynamics for variable length continuum robotic arms.	db/conf/icra/icra2011.html#GodageBGMC11
2125359	Katherine_L._Silversides,Arman_Melkumyan,Derek_A._Wyman,Peter_Hatherly,Eric_Nettleton	2011	Detection of geological structure using gamma logs for autonomous mining.	db/conf/icra/icra2011.html#SilversidesMWHN11
2125372	Payam_Zarafshan,S._Ali_A._Moosavian	2011	Control of a space robot with flexible members.	db/conf/icra/icra2011.html#ZarafshanM11
2125377	Sami_Hussein,Moritz_Buchel,ger	2011	Stable, adaptive interaction and contact transition control of a high inertia haptic interface for haptic simulation in gait rehabilitation.	db/conf/icra/icra2011.html#HusseinBK11
2125392	Daniel_Di_Marco,Andreas_Koch_0003,Oliver_Zweigle,ussermann,rn_Schiessle,Paul_Levi,pez,Luis_Riazuelo,Javier_Civera,J._M._M._Montiel,Moritz_Tenorth,Alexander_Clifford_Perzylo,Markus_Waibel,van_de_Molengraft	2012	Creating and using RoboEarth object models.	db/conf/icra/icra2012.html#MarcoKZHSLGRCMTPWM12
2125396	Makoto_Arie,Alessandro_Moro,Yuma_Hoshikawa,Toru_Ubukata,Kenji_Terabayashi,Kazunori_Umeda	2011	Fast and stable human detection using multiple classifiers based on subtraction stereo with HOG features.	db/conf/icra/icra2011.html#ArieMHUTU11
2125404	Shuai_Yuan,Brad_T._Skinner,Shoudong_Huang,Dikai_Liu,Gamini_Dissanayake,Haye_Lau,Daniel_Pagac,Tim_Pratley	2010	Mathematical modelling of container transfers for a fleet of autonomous straddle carriers.	db/conf/icra/icra2010.html#YuanSHLDLPP10
2125438	Alexander_D._Stewart,Paul_Newman_0001	2012	LAPS - localisation using appearance of prior structure: 6-DoF monocular camera localisation using prior pointclouds.	db/conf/icra/icra2012.html#StewartN12
2125440	Salomon_Trujillo,Barrett_Heyneman,Mark_R._Cutkosky	2010	Constrained convergent gait regulation for a climbing robot.	db/conf/icra/icra2010.html#TrujilloHC10
2125451	Moritz_Tenorth,Alexander_Clifford_Perzylo,Reinhard_Lafrenz,Michael_Beetz	2012	The RoboEarth language: Representing and exchanging knowledge about actions, objects, and environments.	db/conf/icra/icra2012.html#TenorthPLB12
2125465	Yogesh_A._Girdhar,Gregory_Dudek	2011	Offline navigation summaries.	db/conf/icra/icra2011.html#GirdharD11
2125469	Syed_Hassan,Jungwon_Yoon	2011	Virtual maintenance system with a two-staged ant colony optimization algorithm.	db/conf/icra/icra2011.html#HassanY11
2125490	Vladimir_Sukhoy,Veselin_Georgiev,Todd_Wegter,Ramy_Sweidan,Alexander_Stoytchev	2012	Learning to slide a magnetic card through a card reader.	db/conf/icra/icra2012.html#SukhoyGWSS12
2125498	Chris_Thorne,Mark_Yim	2011	Towards the development of gyroscopically controlled micro air vehicles.	db/conf/icra/icra2011.html#ThorneY11
2125501	Hwan_Taek_Ryu,Jae_Yeon_Choi,Byung-Ju_Yi	2012	Impact dynamics of a finger mechanism with application to onset of a cart motion.	db/conf/icra/icra2012.html#RyuCY12
2125504	Calvin_Hung,Mitch_Bryson,Salah_Sukkarieh	2012	ut" - an unsupervised object segmentation algorithm for aerial robotic surveillance applications.	db/conf/icra/icra2012.html#HungBS12
2125505	Nils_Napp,Eric_Klavins	2010	Robust by composition: Programs for multi-robot systems.	db/conf/icra/icra2010.html#NappK10
2125510	Seth_Hutchinson,Timothy_Bretl	2012	Robust optimal deployment of mobile sensor networks.	db/conf/icra/icra2012.html#HutchinsonB12
2125513	Eric_Rombokas,Mark_Malhotra,Yoky_Matsuoka	2011	Task-specific demonstration and practiced synergies for writing with the ACT hand.	db/conf/icra/icra2011.html#RombokasMM11
2125520	Peter_Kazanzides,Yanni_Kouskoulas,Anton_Deguet,Zhong_Shao	2012	Proving the correctness of concurrent robot software.	db/conf/icra/icra2012.html#KazanzidesKDS12
2125525	Lawrence_H._Erickson,Steven_M._LaValle	2012	Navigation among visually connected sets of partially distinguishable landmarks.	db/conf/icra/icra2012.html#EricksonL12
2125532	Bastian_Steder,Radu_Bogdan_Rusu,Kurt_Konolige,Wolfram_Burgard	2011	Point feature extraction on 3D range scans taking into account object boundaries.	db/conf/icra/icra2011.html#StederRKB11
2125543	Roland_Behrens,Conrad_Kuchler,Tilo_Forster,Norbert_Elkmann	2011	Kinematics analysis of a 3-DOF joint for a novel hyper-redundant robot arm.	db/conf/icra/icra2011.html#BehrensKFE11
2125556	Aitor_Aldoma,Federico_Tombari,Markus_Vincze	2012	Supervised learning of hidden and non-hidden 0-order affordances and detection in real scenes.	db/conf/icra/icra2012.html#AldomaTV12
2125559	Paul_E._I._Pounds,Daniel_R._Bersak,Aaron_M._Dollar	2011	Grasping from the air: Hovering capture and load stability.	db/conf/icra/icra2011.html#PoundsBD11
2125561	Andrzej_Pronobis,Patric_Jensfelt	2012	Large-scale semantic mapping and reasoning with heterogeneous modalities.	db/conf/icra/icra2012.html#PronobisJ12
2125567	Bo_Zhang,Yo_Kobayashi,Yoshinari_Maeda,Toshio_Chiba,Masakatsu_G._Fujie	2011	Development of 6-DOF wire-driven robotic manipulator for minimally invasive fetal surgery.	db/conf/icra/icra2011.html#ZhangKMCF11
2125584	M._Khorami_Llewellyn,Paolo_Dario,Arianna_Menciassi,Edoardo_Sinibaldi	2012	Magnetic dragging of vascular obstructions by means of electrostatic and antibody binding.	db/conf/icra/icra2012.html#LlewellynDMS12
2125586	Eric_Holec,Nikolaos_Papanikolopoulos	2011	A probabilistic quality metric for camera placement in 3D reconstructions.	db/conf/icra/icra2011.html#HolecP11
2125587	Jens_Wawerla,Richard_T._Vaughan	2010	A fast and frugal method for team-task allocation in a multi-robot transportation system.	db/conf/icra/icra2010.html#WawerlaV10
2125588	Jing_Guo,Gangfeng_Yan,Zhiyun_Lin	2010	Cooperative control synthesis for moving-target-enclosing with changing topologies.	db/conf/icra/icra2010.html#GuoYL10
2125599	Jie_Yang_0002,Shuangquan_Wang,Ningjiang_Chen,Xin_Chen,Pengfei_Shi	2010	Wearable accelerometer based extendable activity recognition system.	db/conf/icra/icra2010.html#YangWCCS10
2125606	kel,Sven_R._Schmidt-Rohr,Zhixing_Xue,sch,diger_Dillmann	2010	Learning of probabilistic grasping strategies using Programming by Demonstration.	db/conf/icra/icra2010.html#JakelSXLD10
2125621	Stefano_Mintchev,Cesare_Stefanini,Alexis_Girin,Stefano_Marrazza,Stefano_Orofino,Vincent_Lebastard,Luigi_Manfredi,Paolo_Dario,ric_Boyer	2012	An underwater reconfigurable robot with bioinspired electric sense.	db/conf/icra/icra2012.html#MintchevSGMOLMDB12
2125623	Artemis_K._Kostarigka,Zoe_Doulgeri,George_A._Rovithakis	2012	Prescribed performance tracking for flexible joint robots with unknown dynamics and elasticity.	db/conf/icra/icra2012.html#KostarigkaDR12
2125625	Matthew_W._McDaniel,Takayuki_Nishihata,Christopher_A._Brooks,Karl_Iagnemma	2010	Ground plane identification using LIDAR in forested environments.	db/conf/icra/icra2010.html#McDanielNBI10
2125634	Jawhar_Ghommam,Maarouf_Saad,al_Mnif	2010	Robust adaptive formation control of fully actuated marine vessels using local potential functions.	db/conf/icra/icra2010.html#GhommamSM10
2125641	Panagiotis_Vartholomeos,M._Reza_Akhavan-Sharif,Pierre_E._Dupont	2012	Motion planning for multiple millimeter-scale magnetic capsules in a fluid environment.	db/conf/icra/icra2012.html#VartholomeosAD12
2125648	Domenico_Prattichizzo,Monica_Malvezzi,Marco_Aggravi,ck	2012	Object motion-decoupled internal force control for a compliant multifingered hand.	db/conf/icra/icra2012.html#PrattichizzoMAW12
2125657	Marco_Morgado,Paulo_Jorge_Ramalho_Oliveira,Carlos_Silvestre	2010	Design and experimental evaluation of an integrated USBL/INS system for AUVs.	db/conf/icra/icra2010.html#MorgadoOS10
2125674	Lychek_Keo,Kiyoshi_Yoshino,Masahiro_Kawaguchi,Masaki_Yamakita	2011	Experimental results for stabilizing of a bicycle with a flywheel balancer.	db/conf/icra/icra2011.html#KeoYKY11
2125682	nderhauf,Peter_Protzel	2012	Towards a robust back-end for pose graph SLAM.	db/conf/icra/icra2012.html#SunderhaufP12
2125687	Ghassan_Bin_Hammam,David_E._Orin,Behzad_Dariush	2010	Whole-body humanoid control from upper-body task specifications.	db/conf/icra/icra2010.html#HammamOD10
2125704	Tue-Cuong_Dong-Si,Anastasios_I._Mourikis	2012	Consistency analysis for sliding-window visual odometry.	db/conf/icra/icra2012.html#Dong-SiM12
2125705	Michael_J._Procopio,Jane_Mulligan,Gregory_Z._Grudic	2010	Coping with imbalanced training data for improved terrain prediction in autonomous outdoor robot navigation.	db/conf/icra/icra2010.html#ProcopioMG10
2125707	Gregory_Dubus,Olivier_David,Yvan_Measson	2010	A vision-based method for estimating vibrations of a flexible arm using on-line sinusoidal regression.	db/conf/icra/icra2010.html#DubusDM10
2125709	ger,Jose_Padial	2012	Simple and robust visual servo control of robot arms using an on-line trajectory generator.	db/conf/icra/icra2012.html#KrogerP12
2125715	Lars_Kunze,Michael_Beetz,Manabu_Saito,Haseru_Azuma,Kei_Okada,Masayuki_Inaba	2012	Searching objects in large-scale indoor environments: A decision-theoretic approach.	db/conf/icra/icra2012.html#KunzeBSAOI12
2125718	Xuan_Song,Xiaowei_Shao,Ryosuke_Shibasaki,Huijing_Zhao,Jinshi_Cui,Hongbin_Zha	2011	A novel laser-based system: Fully online detection of abnormal activity via an unsupervised method.	db/conf/icra/icra2011.html#SongSSZCZ11
2125726	Qian_Zhao,Max_Q.-H._Meng	2011	A strategy to abstract WCE video clips based on LDA.	db/conf/icra/icra2011.html#ZhaoM11
2125735	Been_Kim,Michael_Kaess,Luke_Fletcher,John_J._Leonard,Abraham_Bachrach,Nicholas_Roy,Seth_J._Teller	2010	Multiple relative pose graphs for robust cooperative mapping.	db/conf/icra/icra2010.html#KimKFLBRT10
2125737	Fanny_Ficuciello,Gianluca_Palli,Claudio_Melchiorri,Bruno_Siciliano	2012	Planning and control during reach to grasp using the three predominant UB hand IV postural synergies.	db/conf/icra/icra2012.html#FicucielloPMS12
2125743	Vlad_Seghete,Todd_D._Murphey	2010	Variational solutions to simultaneous collisions between multiple rigid bodies.	db/conf/icra/icra2010.html#SegheteM10
2125746	Yunyi_Jia,Ning_Xi,Yunxia_Wang,Xin_Li	2012	Online identification of quality of teleoperator (QoT) for performance improvement of telerobotic operations.	db/conf/icra/icra2012.html#JiaXWL12
2125752	Ling_Xu,Anthony_Stentz	2011	An efficient algorithm for environmental coverage with multiple robots.	db/conf/icra/icra2011.html#XuS11a
2125756	Yuanqing_Wu,Hong_Wang,Zexiang_Li,Yunjiang_Lou,Jinbo_Shi	2010	Quotient kinematics machines: Concept, analysis and synthesis.	db/conf/icra/icra2010.html#WuWLLS10
2125757	Bradley_E._Bishop	2012	Formation control of underactuated autonomous surface vessels using redundant manipulator analogs.	db/conf/icra/icra2012.html#Bishop12
2125770	Zhixing_Xue,Steffen_W._Ruehl,Andreas_Hermann,Thilo_Kerscher,diger_Dillmann	2011	An autonomous ice-cream serving robot.	db/conf/icra/icra2011.html#XueRHKD11
2125786	Ning_Wei,Baopu_Li,Qing_He,Chao_Hu,Max_Q.-H._Meng	2012	A novel correspondence searching strategy in multiocular vision.	db/conf/icra/icra2012.html#WeiLHHM12
2125799	Jaemin_Lee,Nicolas_Mansard,Jaeheung_Park	2011	Intermediate desired value approach for continuous transition among multiple tasks of robots.	db/conf/icra/icra2011.html#LeeMP11
2125807	Cesare_Stefanini,Stefano_Orofino,Luigi_Manfredi,Stefano_Mintchev,Stefano_Marrazza,Tareq_Assaf,L._Capantini,Edoardo_Sinibaldi,Sten_Grillner,n,Paolo_Dario	2012	A compliant bioinspired swimming robot with neuro-inspired control and autonomous behavior.	db/conf/icra/icra2012.html#StefaniniOMMMACSGWD12
2125811	Behzad_Dariush,Youding_Zhu,Arjun_Arumbakkam,Kikuo_Fujimura	2010	Constrained closed loop inverse kinematics.	db/conf/icra/icra2010.html#DariushZAF10
2125815	Arvid_Q._L._Keemink,Matteo_Fumagalli,Stefano_Stramigioli,Raffaella_Carloni	2012	Mechanical design of a manipulation system for unmanned aerial vehicles.	db/conf/icra/icra2012.html#KeeminkFSC12
2125816	Noa_Agmon,Chien-Liang_Fok,Yehuda_Emaliah,Peter_Stone,Christine_Julien,Sriram_Vishwanath	2012	On coordination in practical multi-robot patrol.	db/conf/icra/icra2012.html#AgmonFESJV12
2125817	Martin_Busack,Guillaume_Morel,Delphine_Bellot	2010	Breathing motion compensation for robot assisted laser osteotomy.	db/conf/icra/icra2010.html#BusackMB10
2125820	David_P._Miller,Matthew_Oelke,Matthew_J._Roman,Jorge_Villatoro,Charles_N._Winton	2010	The CBC: A LINUX-based low-cost mobile robot controller.	db/conf/icra/icra2010.html#MillerORVW10
2125822	Ali_Hassan_Zahraee,Benoit_Herman,me_Szewczyk	2011	Mechatronic design of a hand-held instrument with active trocar for laparoscopy.	db/conf/icra/icra2011.html#ZahraeeHS11
2125825	Devin_Neal,H._Harry_Asada	2010	Phased-array piezoelectric actuators using a buckling mechanism having large displacement amplification and nonlinear stiffness.	db/conf/icra/icra2010.html#NealA10
2125828	Kevin_Kemper,Devin_Koepl,Jonathan_W._Hurst	2010	Optimal passive dynamics for torque/force control.	db/conf/icra/icra2010.html#KemperKH10
2125830	Stephen_S._Nestinger,Harry_H._Cheng	2011	Mobile-R: A reconfigurable cooperative control platform for rapid deployment of multi-robot systems.	db/conf/icra/icra2011.html#NestingerC11
2125833	Koichi_Suzumori,Masaki_Mihara,Shuichi_Wakimoto	2011	Beautiful Flexible Microactuator changing its structural color with variable pitch grating.	db/conf/icra/icra2011.html#SuzumoriMW11
2125844	Leila_Takayama,Eitan_Marder-Eppstein,Helen_Harris,Jenay_M._Beer	2011	Assisted driving of a mobile remote presence system: System design and controlled user evaluation.	db/conf/icra/icra2011.html#TakayamaMHB11
2125850	Liang_Zhao,Shoudong_Huang,Lei_Yan,Gamini_Dissanayake	2011	Parallax angle parametrization for monocular SLAM.	db/conf/icra/icra2011.html#ZhaoHYD11
2125852	Junqiu_Wang,Yasushi_Yagi	2010	Visual tracking and segmentation using appearance and spatial information of patches.	db/conf/icra/icra2010.html#WangY10
2125866	Nathaniel_Zoso,ment_Gosselin	2012	Point-to-point motion planning of a parallel 3-dof underactuated cable-suspended robot.	db/conf/icra/icra2012.html#ZosoG12
2125877	Athanasios_Krontiris,Sushil_J._Louis,Kostas_E._Bekris	2011	General dynamic formations for non-holonomic systems along planar curvilinear coordinates.	db/conf/icra/icra2011.html#KrontirisLB11
2125882	Marco_Gabiccini,Edoardo_Farnioli,Antonio_Bicchi	2012	Grasp and manipulation analysis for synergistic underactuated hands under general loading conditions.	db/conf/icra/icra2012.html#GabicciniFB12
2125890	Pablo_Espinace,Thomas_Kollar,Alvaro_Soto,Nicholas_Roy	2010	Indoor scene recognition through object detection.	db/conf/icra/icra2010.html#EspinaceKSR10
2125891	Giuseppe_Tortora,Sebastiano_Caccavaro,Pietro_Valdastri,Arianna_Menciassi,Paolo_Dario	2010	Design of an autonomous swimming miniature robot based on a novel concept of magnetic actuation.	db/conf/icra/icra2010.html#TortoraCVMD10
2125892	guez,Jory_Denny,Juan_Burgos,Aditya_Mahadevan,Kasra_Manavi,Luke_Murray,Anton_Kodochygov,Takis_Zourntos,Nancy_M._Amato	2011	Toward realistic pursuit-evasion using a roadmap-based approach.	db/conf/icra/icra2011.html#RodriguezDBMMMKZA11
2125895	Massimiliano_Simi,Gianluca_Sardi,Pietro_Valdastri,Arianna_Menciassi,Paolo_Dario	2011	Magnetic Levitation camera robot for endoscopic surgery.	db/conf/icra/icra2011.html#SimiSVMD11
2125896	Johannes_Schrimpf,Lars_Erik_Wetterwald	2012	Experiments towards automated sewing with a multi-robot system.	db/conf/icra/icra2012.html#SchrimpfW12
2125903	Zhe_Lu,Christopher_Moraes,Yan_Zhao,LiDan_You,Craig_A._Simmons,Yu_Sun_0001	2010	A micromanipulation system for single cell deposition.	db/conf/icra/icra2010.html#LuMZYSS10
2125910	Masahiro_Tomono	2012	Image-based planar reconstruction for dense robotic mapping.	db/conf/icra/icra2012.html#Tomono12
2125917	Matanya_B._Horowitz,Joel_W._Burdick	2012	Combined grasp and manipulation planning as a trajectory optimization problem.	db/conf/icra/icra2012.html#HorowitzB12
2125918	Masahiro_Ohka,Takuya_Matsunaga,Yu_Nojima,Daiji_Noda,Tadashi_Hattori	2012	Basic experiments of three-axis tactile sensor using optical flow.	db/conf/icra/icra2012.html#OhkaMNNH12
2125922	Akihiko_Murai,Katsu_Yamane,Yoshihiko_Nakamura	2010	Effects of nerve signal transmission delay in somatosensory reflex modeling based on inverse dynamics and optimization.	db/conf/icra/icra2010.html#MuraiYN10
2125925	Manuel_G._Catalano,Giorgio_Grioli,Manolo_Garabini,Fabio_Bonomo,Michele_Mancini,Nikolaos_G._Tsagarakis,Antonio_Bicchi	2011	VSA-CubeBot: A modular variable stiffness platform for multiple degrees of freedom robots.	db/conf/icra/icra2011.html#CatalanoGGBMTB11
2125931	Masaaki_Kumagai,Ralph_L._Hollis	2012	Development and control of a three DOF planar induction motor.	db/conf/icra/icra2012.html#KumagaiH12
2125932	Shaohui_Foong,Kok-Meng_Lee,Kun_Bai	2010	Magnetic field-based sensing method for spherical joint.	db/conf/icra/icra2010.html#FoongLB10
2125934	Navid_Aghasadeghi,Andrew_Long,Timothy_Bretl	2012	Inverse optimal control for a hybrid dynamical system with impacts.	db/conf/icra/icra2012.html#AghasadeghiLB12
2125935	Michael_Fleder,Issa_A._D._Nesnas,Mihail_Pivtoraiko,Alonzo_Kelly,Richard_Volpe	2011	Autonomous rover traverse and precise arm placement on remotely designated targets.	db/conf/icra/icra2011.html#FlederNPKV11
2125936	lez,ndez-Sosa,ndez-Perdomo,mez,nguez-Brito,n	2011	Path planning for underwater gliders using iterative optimization.	db/conf/icra/icra2011.html#GonzalezHFCDP11
2125951	Matthias_Luber,Johannes_Andreas_Stork,Gian_Diego_Tipaldi,Kai_Oliver_Arras	2010	People tracking with human motion predictions from social forces.	db/conf/icra/icra2010.html#LuberSTA10
2125953	Huat_Kin_Low,Chee_Wee_Chong,Chunlin_Zhou,Gerald_Lee_Gim_Seet	2010	An improved semi-empirical model for a body and/or caudal fin (BCF) fish robot.	db/conf/icra/icra2010.html#LowCZS10
2125964	Ajay_J._Joshi,Fatih_Porikli,Nikolaos_Papanikolopoulos	2012	Coverage optimized active learning for k - NN classifiers.	db/conf/icra/icra2012.html#JoshiPP12
2125965	Chee_Sing_Lee_0001,Daniel_E._Clark,Joaquim_Salvi	2012	SLAM with single cluster PHD filters.	db/conf/icra/icra2012.html#LeeCS12
2125966	Jianguo_Zhao,Ning_Xi,Bingtuan_Gao,Matt_W._Mutka,Li_Xiao	2011	Development of a controllable and continuous jumping robot.	db/conf/icra/icra2011.html#ZhaoXGMX11
2125973	Christine_Chevallereau,ric_Boyer,Vincent_Lebastard,M._Benachenou	2012	Electric sensor based control for underwater multi-agents navigation in formation.	db/conf/icra/icra2012.html#ChevallereauBLB12
2125974	Friedrich_Lange,Johannes_Scharrer,Gerd_Hirzinger	2010	Classification and prediction for accurate sensor-based assembly to moving objects.	db/conf/icra/icra2010.html#LangeSH10
2125984	Giuk_Lee,Geeyun_Wu,Sun_Ho_Kim,JongWon_Kim_0002,Taewon_Seo	2012	Combot: Compliant climbing robotic platform with transitioning capability and payload capacity.	db/conf/icra/icra2012.html#LeeWKKS12
2125986	Kiyoshi_Irie,Tomoaki_Yoshida,Masahiro_Tomono	2011	A High Dynamic Range vision approach to outdoor localization.	db/conf/icra/icra2011.html#IrieYT11
2125999	alves,R._Azinheira,Patrick_Rives	2010	Homography-based visual servoing of an aircraft for automatic approach and landing.	db/conf/icra/icra2010.html#GoncalvesAR10
2126012	Guilin_Yang,Tat_Joo_Teo,I-Ming_Chen,Wei_Lin_0002	2011	Analysis and design of a 3-DOF flexure-based zero-torsion parallel manipulator for nano-alignment applications.	db/conf/icra/icra2011.html#YangTCL11
2126027	Sunil_Kumar_Agrawal,Xi_Chen,James_C._Galloway	2010	Training special needs infants to drive mobile robots using force-feedback joystick.	db/conf/icra/icra2010.html#AgrawalCG10
2126029	rez-D'Arpino,ndez,n-Leon,Juan_M._Bogado,Rafael_R._Torrealba,pez	2010	Generalized Bilateral MIMO Control by States Convergence with time delay and application for the teleoperation of a 2-DOF helicopter.	db/conf/icra/icra2010.html#Perez-DArpinoMFBTF10
2126037	Junaed_Sattar,Anqi_Xu,Gregory_Dudek,Gabriel_Charette	2010	Graphical state-space programmability as a natural interface for robotic control.	db/conf/icra/icra2010.html#SattarXDC10
2126042	Ying_Mao,Sunil_Kumar_Agrawal	2010	Wearable cable-driven upper arm exoskeleton - motion with transmitted joint force and moment minimization.	db/conf/icra/icra2010.html#MaoA10
2126055	Gurdayal_S._Koonjul,Garth_Zeglin,Nancy_S._Pollard	2011	Measuring contact points from displacements with a compliant, articulated robot hand.	db/conf/icra/icra2011.html#KoonjulZP11
2126062	Paulo_Vinicius_Koerich_Borges,Robert_Zlot,Michael_Bosse,Stephen_Nuske,Ashley_Desmond_Tews	2010	Vision-based localization using an edge map extracted from 3D laser range data.	db/conf/icra/icra2010.html#BorgesZBNT10
2126067	Arturo_L._Rankin,Larry_H._Matthies,Paolo_Bellutta	2011	Daytime water detection based on sky reflections.	db/conf/icra/icra2011.html#RankinMB11
2126075	Elena_Leah_Glassman,Russ_Tedrake	2010	A quadratic regulator-based heuristic for rapidly exploring state space.	db/conf/icra/icra2010.html#GlassmanT10
2126082	Shunli_Xiao,Yangmin_Li	2012	Mobility and kinematic analysis of a novel dexterous micro gripper.	db/conf/icra/icra2012.html#XiaoL12
2126083	s,Leopoldo_Armesto,Josep_Tornero	2011	On generating continuous-curvature paths for line following problem with curvature and sharpness constraints.	db/conf/icra/icra2011.html#GirbesAT11
2126093	Igi_Ardiyanto,Jun_Miura	2012	3D time-space path planning algorithm in dynamic environment utilizing Arrival Time Field and Heuristically Randomized Tree.	db/conf/icra/icra2012.html#ArdiyantoM12
2126100	Antoine_Bautin,Luis_Martinez-Gomez,Thierry_Fraichard	2010	Inevitable Collision States: A probabilistic perspective.	db/conf/icra/icra2010.html#BautinMF10
2126104	Amanda_Prorok,Christopher_M._Cianci,Alcherio_Martinoli	2010	Towards optimally efficient field estimation with threshold-based pruning in real robotic sensor networks.	db/conf/icra/icra2010.html#ProrokCM10
2126107	Amarjeet_Singh_0003,Fabio_Ramos,Hugh_F._Durrant-Whyte,William_J._Kaiser	2010	Modeling and decision making in spatio-temporal processes for environmental surveillance.	db/conf/icra/icra2010.html#SinghRWK10
2126126	Ioan_Alexandru_Sucan,Lydia_E._Kavraki	2010	On the implementation of single-query sampling-based motion planners.	db/conf/icra/icra2010.html#SucanK10
2126133	Michel_Franken,Bert_Willaert,Sarthak_Misra,Stefano_Stramigioli	2011	Bilateral telemanipulation: Improving the complementarity of the frequency- and time-domain passivity approaches.	db/conf/icra/icra2011.html#FrankenWMS11
2126140	T._William_Mather,M._Ani_Hsieh,Emilio_Frazzoli	2010	Towards dynamic team formation for robot ensembles.	db/conf/icra/icra2010.html#MatherHF10
2126142	Chad_C._Kessens,Jaydev_P._Desai	2010	Design, fabrication, and implementation of self-sealing suction cup arrays for grasping.	db/conf/icra/icra2010.html#KessensD10
2126143	Guanfeng_Liu	2011	A practical algorithm for robot path planning with imprecise environmental dimensions.	db/conf/icra/icra2011.html#Liu11
2126153	Marta_Niccolini,Mario_Innocenti,Lorenzo_Pollini	2010	Near optimal swarm deployment using Descriptor Functions.	db/conf/icra/icra2010.html#NiccoliniIP10
2126154	Satoshi_Hoshino,Hiroya_Seki,Yuji_Naka,Jun_Ota	2010	Autonomous cruise control of circulating multi-robot for congestion.	db/conf/icra/icra2010.html#HoshinoSNO10
2126166	Amit_Bhatia,Lydia_E._Kavraki,Moshe_Y._Vardi	2010	Sampling-based motion planning with temporal goals.	db/conf/icra/icra2010.html#BhatiaKV10
2126178	ois,ment_Gosselin	2010	Point-to-point motion control of a pendulum-like 3-dof underactuated cable-driven robot.	db/conf/icra/icra2010.html#LefrancoisG10
2126181	Gianluca_Garofalo,Christian_Ott,ffer	2012	Walking control of fully actuated robots based on the Bipedal SLIP model.	db/conf/icra/icra2012.html#GarofaloOA12
2126195	Shiqi_Zhang,Mohan_Sridharan,Xiang_Li	2011	To look or not to look: A hierarchical representation for visual planning on mobile robots.	db/conf/icra/icra2011.html#ZhangSL11
2126199	Zhibin_Li,Bram_Vanderborght,Nikolaos_G._Tsagarakis,Luca_Colasanto,Darwin_G._Caldwell	2012	Stabilization for the compliant humanoid robot COMAN exploiting intrinsic and controlled compliance.	db/conf/icra/icra2012.html#LiVTCC12
2126200	Won_Suk_You,Byungjune_Choi,Bumsoo_Kim,Hyungpil_Moon,Jachoon_Koo,Wankyun_Chung,Hyouk_Ryeol_Choi	2010	Global localization for a small mobile robot using magnetic patterns.	db/conf/icra/icra2010.html#YouCKMKCC10
2126206	Daniel_Maier,Alexander_Kleiner	2010	Improved GPS sensor model for mobile robots in urban terrain.	db/conf/icra/icra2010.html#MaierK10
2126209	Alexander_Koenig,Antonello_L._G._Caruso,Marc_Bolliger,Luca_Somaini,Ximena_Omlin,Manfred_Morari,Robert_Riener	2011	Model-based heart rate control during robot-assisted gait training.	db/conf/icra/icra2011.html#KoenigCBSOMR11
2126216	Florent_Valette,Franck_Ruffier,phane_Viollet,Tobias_Seidl	2010	Biomimetic optic flow sensing applied to a lunar landing scenario.	db/conf/icra/icra2010.html#ValetteRVS10
2126224	Hiroya_Yamada	2012	A Radial Crank-type continuously variable transmission driven by two ball screws.	db/conf/icra/icra2012.html#Yamada12
2126237	Mathias_Perrollaz,Sami_Khorbotly,Amber_Cool,John-David_Yoder,Eric_T._Baumgartner	2012	Teachless teach-repeat: Toward vision-based programming of industrial robots.	db/conf/icra/icra2012.html#PerrollazKCYB12
2126238	Javier_Ruiz-del-Solar,Javier_Moya,Isao_Parra-Tsunekawa	2010	Fall detection and management in biped humanoid robots.	db/conf/icra/icra2010.html#Ruiz-del-SolarMP10
2126258	Flavia_Vitale,Dino_Accoto,Luca_Turchetti,Stefano_Indini,Maria_Cristina_Annesini,Eugenio_Guglielmelli	2010	Low-temperature H2O2-powered actuators for biorobotics: Thermodynamic and kinetic analysis.	db/conf/icra/icra2010.html#VitaleATIAG10
2126261	Youhei_Kakiuchi,Ryohei_Ueda,Kei_Okada,Masayuki_Inaba	2011	Creating household environment map for environment manipulation using color range sensors on environment and robot.	db/conf/icra/icra2011.html#KakiuchiUOI11
2126269	Rodrigo_Moreno,Jonatan_Gomez	2011	Central pattern generators and hormone inspired messages: A hybrid control strategy to implement motor primitives on chain type modular reconfigurable robots.	db/conf/icra/icra2011.html#MorenoG11
2126273	Omar_Oreifej,Niels_da_Vitoria_Lobo,Mubarak_Shah	2011	Horizon constraint for unambiguous UAV navigation in planar scenes.	db/conf/icra/icra2011.html#OreifejLS11
2126287	Kyoungchul_Kong,Joonbum_Bae,Masayoshi_Tomizuka	2010	A compact rotary series elastic actuator for knee joint assistive system.	db/conf/icra/icra2010.html#KongBT10
2126288	Jie_Zhao,Xindan_Cui,Yanhe_Zhu,Shufeng_Tang	2011	A new self-reconfigurable modular robotic system UBot: Multi-mode locomotion and self-reconfiguration.	db/conf/icra/icra2011.html#ZhaoCZT11
2126291	Anca_D._Dragan,Nathan_D._Ratliff,Siddhartha_S._Srinivasa	2011	Manipulation planning with goal sets using constrained trajectory optimization.	db/conf/icra/icra2011.html#DraganRS11
2126308	Vincenzo_Lippiello,Fabio_Ruggiero	2012	3D monocular robotic ball catching with an iterative trajectory estimation refinement.	db/conf/icra/icra2012.html#LippielloR12
2126311	Reuben_D._Brewer,J._Kenneth_Salisbury	2010	Visual vein-finding for robotic IV insertion.	db/conf/icra/icra2010.html#BrewerS10
2126316	Kostas_Alexis,George_Nikolakopoulos,Anthony_Tzes	2010	Design and experimental verification of a Constrained Finite Time Optimal control scheme for the attitude control of a Quadrotor Helicopter subject to wind gusts.	db/conf/icra/icra2010.html#AlexisNT10
2126322	Yohan_Noh,Masanao_Segawa,Kei_Sato,Chunbao_Wang,Hiroyuki_Ishii,Jorge_Solis,Atsuo_Takanishi,Akitoshi_Katsumata,Yukihiro_Iida	2011	Development of a robot which can simulate swallowing of food boluses with various properties for the study of rehabilitation of swallowing disorders.	db/conf/icra/icra2011.html#NohSSWISTKI11
2126333	ment_Gosselin,Ping_Ren,Simon_Foucault	2012	Dynamic trajectory planning of a two-DOF cable-suspended parallel robot.	db/conf/icra/icra2012.html#GosselinRF12
2126334	Nikolaos_G._Tsagarakis,Zhibin_Li,Jody_Alessandro_Saglia,Darwin_G._Caldwell	2011	The design of the lower body of the compliant humanoid robot "cCub".	db/conf/icra/icra2011.html#TsagarakisLSC11
2126364	Van_Anh_Ho,Shinichi_Hirai	2010	Two-dimensional dynamic modeling of a sliding motion of a soft fingertip focusing on stick-to-slip transition.	db/conf/icra/icra2010.html#HoH10
2126369	Kris_K._Hauser,Victor_Ng-Thow-Hing	2010	Fast smoothing of manipulator trajectories using optimal bounded-acceleration shortcuts.	db/conf/icra/icra2010.html#HauserN10
2126374	Alexander_J._B._Trevor,John_G._Rogers_III,Henrik_I._Christensen	2012	Planar surface SLAM with 3D and 2D sensors.	db/conf/icra/icra2012.html#TrevorRC12
2126378	Hemanth_Korrapati,Jonathan_Courbon,Youcef_Mezouar,Philippe_Martinet	2012	Image Sequence Partitioning for outdoor mapping.	db/conf/icra/icra2012.html#KorrapatiCMM12
2126380	Nitesh_Shroff,Yuichi_Taguchi,Oncel_Tuzel,Ashok_Veeraraghavan,Srikumar_Ramalingam,Haruhisa_Okuda	2011	Finding a needle in a specular haystack.	db/conf/icra/icra2011.html#ShroffTTVRO11
2126395	Paul_Vernaza,Daniel_D._Lee	2011	Efficient dynamic programming for high-dimensional, optimal motion planning by spectral learning of approximate value function symmetries.	db/conf/icra/icra2011.html#VernazaL11
2126398	Su_Zhao,Yan_Naing_Aye,Cheng_Yap_Shee,I-Ming_Chen,Wei_Tech_Ang	2012	A compact 3-DOF compliant serial mechanism for trajectory tracking with flexures made by rapid prototyping.	db/conf/icra/icra2012.html#ZhaoASCA12
2126405	Shuo_Huang,Jindong_Tan	2012	Adaptive sampling using mobile sensor networks.	db/conf/icra/icra2012.html#HuangT12
2126428	Kentaro_Kofuji,Yoshihiro_Watanabe,Takashi_Komuro,Masatoshi_Ishikawa	2011	Stereo 3D reconstruction using prior knowledge of indoor scenes.	db/conf/icra/icra2011.html#KofujiWKI11
2126443	Hao_Su,Michael_Zervas,Gregory_A._Cole,Cosme_Furlong,Gregory_S._Fischer	2011	Real-time MRI-guided needle placement robot with integrated fiber optic force sensing.	db/conf/icra/icra2011.html#SuZCFF11
2126449	Mayuko_Mori,Koichi_Suzumori,Shuichi_Wakimoto,Takefumi_Kanda,Masayuki_Takahashi,Takashi_Hosoya,Emi_Takematu	2010	Development of power robot hand with shape adaptability using hydraulic McKibben muscles.	db/conf/icra/icra2010.html#MoriSWKTHT10
2126457	Wen_Lik_Dennis_Lui,Titus_Jia_Jie_Tang,Tom_Drummond,Wai_Ho_Li	2012	Robust egomotion estimation using ICP in inverse depth coordinates.	db/conf/icra/icra2012.html#LuiTDL12
2126458	Yipu_Zhao,Mengwen_He,Huijing_Zhao,Franck_Davoine,Hongbin_Zha	2012	Computing object-based saliency in urban scenes using laser sensing.	db/conf/icra/icra2012.html#ZhaoHZDZ12
2126463	David_Johan_Christensen,Ulrik_Pagh_Schultz,y	2010	A distributed strategy for gait adaptation in modular robots.	db/conf/icra/icra2010.html#ChristensenSS10
2126469	Je-Sung_Koh,Kyu-Jin_Cho	2011	Endoskeletons using composite flexure joint for biomimetic meso-scale robot.	db/conf/icra/icra2011.html#KohC11
2126474	Junghwan_Lee,OSung_Kwon,Liangjun_Zhang,Sung-Eui_Yoon	2012	SR-RRT: Selective retraction-based RRT planner.	db/conf/icra/icra2012.html#LeeKZY12
2126487	Weiming_Li,Youfu_Li	2011	An analytical solution to optimal focal distance in catadioptric imaging systems.	db/conf/icra/icra2011.html#LiL11a
2126492	me_Maye,Ralf_Kaestner,Roland_Siegwart	2012	Curb detection for a pedestrian robot in urban environments.	db/conf/icra/icra2012.html#MayeKS12
2126495	Yan_Qiao,Naiqi_Wu,MengChu_Zhou	2012	Petri net-based real-time scheduling of time-constrained single-arm cluster tools with activity time variation.	db/conf/icra/icra2012.html#QiaoWZ12
2126496	Paul_Hebert,Nicolas_Hudson,Jeremy_Ma,Joel_W._Burdick	2011	Fusion of stereo vision, force-torque, and joint sensors for estimation of in-hand object location.	db/conf/icra/icra2011.html#HebertHMB11
2126501	Klas_Kronander,Aude_Billard	2012	Online learning of varying stiffness through physical human-robot interaction.	db/conf/icra/icra2012.html#KronanderB12
2126511	Supreeth_Achar,C._V._Jawahar,K._Madhava_Krishna	2011	Large scale visual localization in urban environments.	db/conf/icra/icra2011.html#AcharJK11
2126520	Sagar_Chowdhury,Petr_Svec,Chenlu_Wang,Wolfgang_Losert,Satyandra_K._Gupta	2012	Gripper synthesis for indirect manipulation of cells using Holographic Optical Tweezers.	db/conf/icra/icra2012.html#ChowdhurySWLG12
2126522	Yekeun_Jeong,Yunsu_Bok,Jun-Sik_Kim,In-So_Kweon	2011	Complementation of cameras and lasers for accurate 6D SLAM: From correspondences to bundle adjustment.	db/conf/icra/icra2011.html#JeongBKK11
2126527	Florian_Petit,ffer	2011	State feedback damping control for a multi DOF variable stiffness robot arm.	db/conf/icra/icra2011.html#PetitA11
2126533	Michael_Ruhnke,mmerle,Giorgio_Grisetti,Wolfram_Burgard	2012	Highly accurate 3D surface models by sparse surface adjustment.	db/conf/icra/icra2012.html#RuhnkeKGB12
2126535	Roman_Kamnik,Miha_Ambroz,Jernej_Kuzelicki,Ivan_Prebil,Marko_Munih	2012	Robot environment for combat vehicle driving simulation.	db/conf/icra/icra2012.html#KamnikAKPM12
2126559	Per_Henrik_Borgstrom,Maxim_A._Batalin,Gaurav_S._Sukhatme,William_J._Kaiser	2010	Weighted barrier functions for computation of force distributions with friction cone constraints.	db/conf/icra/icra2010.html#BorgstromBSK10
2126560	Markus_Ryll,lthoff,Paolo_Robuffo_Giordano	2012	Modeling and control of a quadrotor UAV with tilting propellers.	db/conf/icra/icra2012.html#RyllBG12
2126564	Alexander_Maye,Andreas_K._Engel	2011	A discrete computational model of sensorimotor contingencies for object perception and control of behavior.	db/conf/icra/icra2011.html#MayeE11
2126573	Kenji_Tahara,Keigo_Maruta,Akihiro_Kawamura,Motoji_Yamamoto	2012	Externally sensorless dynamic regrasping and manipulation by a triple-fingered robotic hand with torsional fingertip joints.	db/conf/icra/icra2012.html#TaharaMKY12
2126574	Gil_Manor,Elon_Rimon	2012	High-speed navigation of a uniformly braking mobile robot using position-velocity configuration space.	db/conf/icra/icra2012.html#ManorR12
2126580	Sachin_Patil,Ron_Alterovitz	2010	Toward automated tissue retraction in robot-assisted surgery.	db/conf/icra/icra2010.html#PatilA10
2126588	Sam_Ann_Rahok,Koichi_Ozaki	2011	Play-back navigation for outdoor mobile robot using trajectory tracking based on environmental magnetic field.	db/conf/icra/icra2011.html#RahokO11
2126593	Yasuhisa_Hasegawa,Junichiro_Tokita,Kiyotaka_Kamibayashi,Yoshiyuki_Sankai	2011	Evaluation of fingertip force accuracy in different support conditions of exoskeleton.	db/conf/icra/icra2011.html#HasegawaTKS11
2126597	Michael_Manz,Thorsten_Luettel,Felix_von_Hundelshausen,Hans-Joachim_Wuensche	2011	Monocular model-based 3D vehicle tracking for autonomous vehicles in unstructured environment.	db/conf/icra/icra2011.html#ManzLHW11
2126637	Thomas_F._Allen,Joel_W._Burdick,Elon_Rimon	2012	Two-fingered caging of polygons via contact-space graph search.	db/conf/icra/icra2012.html#AllenBR12
2126640	Kathrin_Eva_Peyer,Li_Zhang_0010,Bradley_Kratochvil,Bradley_J._Nelson	2010	Non-ideal swimming of artificial bacterial flagella near a surface.	db/conf/icra/icra2010.html#PeyerZKN10
2126644	Serge_Montambault,Nicolas_Pouliot,Janos_Toth,Bernhard_Spalteholz	2010	Reporting on a large ocean inlet crossing live transmission line inspection performed by linescout technology.	db/conf/icra/icra2010.html#MontambaultPTS10
2126645	Simone_Marcheschi,Fabio_Salsedo,Marco_Fontana,Massimo_Bergamasco	2011	Body Extender: Whole body exoskeleton for human power augmentation.	db/conf/icra/icra2011.html#MarcheschiSFB11
2126653	Jie_Tang,Arjun_Singh,Nimbus_Goehausen,Pieter_Abbeel	2010	Parameterized maneuver learning for autonomous helicopter flight.	db/conf/icra/icra2010.html#TangSGA10
2126656	Peter_Anderson-Sprecher,Reid_G._Simmons,Daniel_Huber	2011	Background subtraction and accessibility analysis in evidence grids.	db/conf/icra/icra2011.html#Anderson-SprecherSH11
2126657	Alexander_Dettmann,Zhuowei_Wang,Wiebke_Wenzel,Florian_Cordes,Frank_Kirchner	2011	Heterogeneous modules with a homogeneous electromechanical interface in multi-module systems for space exploration.	db/conf/icra/icra2011.html#DettmannWWCK11
2126660	Uwe_Mettin,Anton_S._Shiriaev,Leonid_B._Freidovich,Mitsuji_Sampei	2010	Optimal ball pitching with an underactuated model of a human arm.	db/conf/icra/icra2010.html#MettinSFS10
2126666	Thai-Chau_Nguyen-Huynh,Inna_Sharf	2011	Adaptive reactionless motion for space manipulator when capturing an unknown tumbling target.	db/conf/icra/icra2011.html#Nguyen-HuynhS11
2126679	Al_Mansur,Yasushi_Makihara,Yasushi_Yagi	2011	Action recognition using dynamics features.	db/conf/icra/icra2011.html#MansurMY11
2126699	Nicolas_A._Tsokas,Kostas_J._Kyriakopoulos	2010	A multiple hypothesis people tracker for teams of mobile robots.	db/conf/icra/icra2010.html#TsokasK10
2126703	Yasemin_Bekiroglu,Kai_Huebner,Danica_Kragic	2011	Integrating grasp planning with online stability assessment using tactile sensing.	db/conf/icra/icra2011.html#BekirogluHK11
2126712	Brian_Mayton,Louis_LeGrand,Joshua_R._Smith	2010	Robot, feed thyself: Plugging in to unmodified electrical outlets by sensing emitted AC electric fields.	db/conf/icra/icra2010.html#MaytonLS10
2126720	Masaru_Kojima,Tatsuya_Miyamoto,Masahiro_Nakajima,Michio_Homma,Toshio_Fukuda	2011	Regulation of moving bacteria sheet with micro channel for transporting and driving micro object.	db/conf/icra/icra2011.html#KojimaMNHF11
2126732	Jan_Fischer,Georg_Arbeiter,Alexander_Verl	2011	Combination of Time-of-Flight depth and stereo using semiglobal optimization.	db/conf/icra/icra2011.html#FischerAV11
2126738	Gabriele_Ferri,Alessandro_Manzi,Francesco_Fornai,Barbara_Mazzolai,Cecilia_Laschi,Francesco_Ciuchi,Paolo_Dario	2011	Design, fabrication and first sea trials of a small-sized autonomous catamaran for heavy metals monitoring in coastal waters.	db/conf/icra/icra2011.html#FerriMFMLCD11
2126749	George_C._Karras,Savvas_G._Loizou,Kostas_J._Kyriakopoulos	2010	A visual-servoing scheme for semi-autonomous operation of an underwater robotic vehicle using an IMU and a Laser Vision System.	db/conf/icra/icra2010.html#KarrasLK10
2126751	Simone_Frintrop	2010	General object tracking with a component-based target descriptor.	db/conf/icra/icra2010.html#Frintrop10
2126763	Jihong_Min,Jungho_Kim,Seunghak_Shin,In-So_Kweon	2012	Efficient Data-Driven MCMC sampling for vision-based 6D SLAM.	db/conf/icra/icra2012.html#MinKSK12
2126770	David_Zarrouk,Inna_Sharf,Moshe_Shoham	2010	Analysis of earthworm-like robotic locomotion on compliant surfaces.	db/conf/icra/icra2010.html#ZarroukSS10
2126773	Roger_E._Goldman,Andrea_Bajo,Nabil_Simaan	2011	Compliant motion control for continuum robots with intrinsic actuation sensing.	db/conf/icra/icra2011.html#GoldmanBS11
2126782	Lars_Blackmore,Yoshiaki_Kuwata,Michael_T._Wolf,Christopher_Assad,Nanaz_Fathpour,Claire_Newman,Alberto_Elfes	2010	Global reachability and path planning for planetary exploration with montgolfiere balloons.	db/conf/icra/icra2010.html#BlackmoreKWAFNE10
2126786	Paul_Kulchenko,Emanuel_Todorov	2011	First-exit model predictive control of fast discontinuous dynamics: Application to ball bouncing.	db/conf/icra/icra2011.html#KulchenkoT11
2126788	Armin_Hornung,Mike_Phillips,Edward_Gil_Jones,Maren_Bennewitz,Maxim_Likhachev,Sachin_Chitta	2012	Navigation in three-dimensional cluttered environments for mobile manipulation.	db/conf/icra/icra2012.html#HornungPJBLC12
2126798	ger	2012	On-line trajectory generation: Nonconstant motion constraints.	db/conf/icra/icra2012.html#Kroger12
2126817	Turgay_Senlet,Ahmed_M._Elgammal	2012	Satellite image based precise robot localization on sidewalks.	db/conf/icra/icra2012.html#SenletE12
2126823	Pablo_Abad-Manterola,Issa_A._D._Nesnas,Joel_W._Burdick	2011	Motion planning on steep terrain for the tethered axel rover.	db/conf/icra/icra2011.html#Abad-ManterolaNB11
2126827	Alexander_J._B._Trevor,John_G._Rogers_III,Carlos_Nieto-Granda,Henrik_Iskov_Christensen	2010	Applying domain knowledge to SLAM using virtual measurements.	db/conf/icra/icra2010.html#TrevorRNC10
2126832	Limin_Zhang,Yimin_Song	2011	Optimal design of the Delta robot based on dynamics.	db/conf/icra/icra2011.html#ZhangS11
2126833	Francesco_Maria_Delle_Fave,Alex_Rogers,Z._Xu,S._Sukkarieh,Nicholas_R._Jennings	2012	Deploying the max-sum algorithm for decentralised coordination and task allocation of unmanned aerial vehicles for live aerial imagery collection.	db/conf/icra/icra2012.html#FaveRXSJ12
2126834	Utku_Culha,Uluc_Saranli	2011	Quadrupedal bounding with an actuated spinal joint.	db/conf/icra/icra2011.html#CulhaS11
2126848	Volkmar_Eichhorn,Sergej_Fatikow,Ozlem_Sardan_Sukas,Torben_Mikael_Hansen,ggild,Luigi_Occhipinti	2010	Novel four-point-probe design and nanorobotic dual endeffector strategy for electrical characterization of as-grown SWCNT bundles.	db/conf/icra/icra2010.html#EichhornFSHBO10
2126851	Damir_Omrcen,Ales_Ude	2010	Redundant control of a humanoid robot head with foveated vision for object tracking.	db/conf/icra/icra2010.html#OmrcenU10
2126859	Nicholas_J._Kohut,Aaron_M._Hoover,Kevin_Y._Ma,Stanley_S._Baek,Ronald_S._Fearing	2011	MEDIC: A legged millirobot utilizing novel obstacle traversal.	db/conf/icra/icra2011.html#KohutHMBF11
2126863	Michael_Weigel-Jech,Sergej_Fatikow	2012	DNA as template for nanobonding and novel nanoelectronic components.	db/conf/icra/icra2012.html#Weigel-JechF12
2126871	Ulrich_Klank,senlechner,Alexis_Maldonado,Michael_Beetz	2012	Robots that validate learned perceptual models.	db/conf/icra/icra2012.html#KlankMMB12
2126877	Muhammad_E._Abdallah,Robert_Platt,Brian_K._Hargrave,Frank_Permenter	2012	Position control of tendon-driven fingers with position controlled actuators.	db/conf/icra/icra2012.html#AbdallahPHP12
2126899	Andrea_Bajo,Roger_E._Goldman,Long_Wang,Dennis_L._Fowler,Nabil_Simaan	2012	Integration and preliminary evaluation of an Insertable Robotic Effectors Platform for Single Port Access Surgery.	db/conf/icra/icra2012.html#BajoGWFS12
2126900	Andrew_Carlson,Nikolaos_Papanikolopoulos	2011	Aquapod: Prototype design of an amphibious tumbling robot.	db/conf/icra/icra2011.html#CarlsonP11
2126903	T._William_Mather,M._Ani_Hsieh	2012	Ensemble synthesis of distributed control and communication strategies.	db/conf/icra/icra2012.html#MatherH12
2126905	Oliver_Birbach,Udo_Frese,uml	2011	Realtime perception for catching a flying ball with a mobile humanoid.	db/conf/icra/icra2011.html#BirbachFB11
2126913	Stefano_Ghidoni,Alberto_Pretto,Emanuele_Menegatti	2010	Cooperative tracking of moving objects and face detection with a dual camera sensor.	db/conf/icra/icra2010.html#GhidoniPM10
2126917	braly,Eric_Royer,Omar_Ait-Aider,Clement_Deymier,Michel_Dhome	2011	Fast calibration of embedded non-overlapping cameras.	db/conf/icra/icra2011.html#LebralyRADD11
2126920	Lingzhi_Luo,Nilanjan_Chakraborty,Katia_P._Sycara	2012	Competitive analysis of repeated greedy auction algorithm for online multi-robot task assignment.	db/conf/icra/icra2012.html#LuoCS12
2126928	Wenqi_Hu,Kelly_S._Ishii,Aaron_T._Ohta	2012	Micro-assembly using optically controlled bubble microrobots in saline solution.	db/conf/icra/icra2012.html#HuIO12
2126931	Xu_Chu_Ding,Jing_Wang,Morteza_Lahijanian,Ioannis_Ch._Paschalidis,Calin_Belta	2012	Temporal logic motion control using actor-critic methods.	db/conf/icra/icra2012.html#DingWLPB12
2126935	Peam_Pipattanasomporn,Attawith_Sudsang	2010	Object caging under imperfect shape knowledge.	db/conf/icra/icra2010.html#PipattanasompornS10
2126957	Marco_Trincavelli,Amy_Loutfi	2010	Feature selection for gas identification with a mobile robot.	db/conf/icra/icra2010.html#TrincavelliL10
2126965	pflinger,C._David_Remy,Marco_Hutter,Luciano_Spinello,Roland_Siegwart	2010	Haptic terrain classification for legged robots.	db/conf/icra/icra2010.html#HoepflingerRHSS10
2126982	Jose_Manuel_Peula,Javier_Cebolla,Cristina_Urdiales,ndez	2010	Explicit coordinated localization using common visual objects.	db/conf/icra/icra2010.html#PeulaCUH10
2126990	Julio_Duenas,Olivier_Lambercy,Dominique_Chapuis,Roger_Gassert	2010	ReGrasp, a robotic tool to investigate fine motor control and track therapy-induced neuroplasticity.	db/conf/icra/icra2010.html#DuenasLCG10
2126992	Brian_C._Becker,Robert_A._MacLachlan,Gregory_D._Hager,Cameron_N._Riviere	2011	Handheld micromanipulation with vision-based virtual fixtures.	db/conf/icra/icra2011.html#BeckerMHR11
2127019	Maya_Hatano,Yo_Kobayashi,Makiko_Suzuki,Yasuyuki_Shiraishi,Tomoyuki_Yambe,Makoto_Hashizume,Masakatsu_G._Fujie	2012	Geometry effect of preloading probe on accurate needle insertion for breast tumor treatment.	db/conf/icra/icra2012.html#HatanoKSSYHF12
2127027	Ubaldo_Ruiz,Rafael_Murrieta-Cid	2012	A homicidal differential drive robot.	db/conf/icra/icra2012.html#RuizM12
2127031	Yuichi_Tsumaki,Fumiaki_Ono,Taisuke_Tsukuda	2012	The 20-DOF miniature humanoid MH-2: A wearable communication system.	db/conf/icra/icra2012.html#TsumakiOT12
2127038	Pierre_Letier,Elvina_Motard,Jean-Philippe_Verschueren	2010	EXOSTATION : Haptic exoskeleton based control station.	db/conf/icra/icra2010.html#LetierMV10a
2127045	Mrinal_Kalakrishnan,Jonas_Buchli,Peter_Pastor,Michael_Mistry,Stefan_Schaal	2010	Fast, robust quadruped locomotion over challenging terrain.	db/conf/icra/icra2010.html#KalakrishnanBPMS10
2127066	Kyle_Gilpin,Daniela_Rus	2012	A distributed algorithm for 2D shape duplication with smart pebble robots.	db/conf/icra/icra2012.html#GilpinR12
2127068	Amaury_Dame,ric_Marchand	2010	Improving mutual information-based visual servoing.	db/conf/icra/icra2010.html#DameM10
2127070	Camillo_J._Taylor,Anthony_Cowley	2011	Fast scene analysis using image and range data.	db/conf/icra/icra2011.html#TaylorC11
2127079	Dmitry_Berenson,Siddhartha_S._Srinivasa	2010	Probabilistically complete planning with end-effector pose constraints.	db/conf/icra/icra2010.html#BerensonS10
2127082	Stefan_B._Williams,Oscar_Pizarro,Michael_V._Jakuba,Ian_Mahon,S._D._Ling,Craig_R._Johnson	2010	Repeated AUV surveying of urchin barrens in North Eastern Tasmania.	db/conf/icra/icra2010.html#WilliamsPJMLJ10
2127085	A._Haq,Yannick_Aoustin,Christine_Chevallereau	2012	Effects of knee locking and passive joint stiffness on energy consumption of a seven-link planar biped.	db/conf/icra/icra2012.html#HaqAC12
2127088	Christian_Di_Natali,Tommaso_Ranzani,Massimiliano_Simi,Arianna_Menciassi,Pietro_Valdastri	2012	Trans-abdominal Active Magnetic Linkage for robotic surgery: Concept definition and model assessment.	db/conf/icra/icra2012.html#NataliRSMV12
2127098	Geoffrey_Biggs	2010	Flexible, adaptable utility components for component-based robot software.	db/conf/icra/icra2010.html#Biggs10
2127108	Anirban_Mazumdar,Martin_Lozano,Aaron_Fittery,H._Harry_Asada	2012	A compact, maneuverable, underwater robot for direct inspection of nuclear power piping systems.	db/conf/icra/icra2012.html#MazumdarLFA12
2127116	Masaru_Kojima,Masahiro_Nakajima,Kingo_Takiguchi,Michio_Homma,Takao_Kondo,Toshio_Fukuda	2012	Control of biological clock activity capsulated by lipid-mono-layer.	db/conf/icra/icra2012.html#KojimaNTHKF12
2127120	Kiho_Kwak,Daniel_F._Huber,Jeongsook_Chae,Takeo_Kanade	2010	Boundary detection based on supervised learning.	db/conf/icra/icra2010.html#KwakHCK10
2127122	Hamal_Marino,Christos_Bergeles,Bradley_J._Nelson	2012	control for electromagnetic steering of microrobots.	db/conf/icra/icra2012.html#MarinoBN12
2127123	Dominic_R._Frutiger,Bradley_Kratochvil,Bradley_J._Nelson	2010	MagMites - Microrobots for wireless microhandling in dry and wet environments.	db/conf/icra/icra2010.html#FrutigerKN10
2127127	Bin_Xu_0007,Daniel_J._Stilwell,Andrew_Kurdila	2010	A receding horizon controller for motion planning in the presence of moving obstacles.	db/conf/icra/icra2010.html#XuSK10
2127132	Adam_Bry,Abraham_Bachrach,Nicholas_Roy	2012	State estimation for aggressive flight in GPS-denied environments using onboard sensing.	db/conf/icra/icra2012.html#BryBR12
2127136	Yi_Sun,Shugen_Ma	2011	Decoupled kinematic control of terrestrial locomotion for an ePaddle-based reconfigurable amphibious robot.	db/conf/icra/icra2011.html#SunM11
2127141	Ã©,Guillaume_Morel	2010	A formal method for avoiding hyperstaticity when connecting an exoskeleton to a human member.	db/conf/icra/icra2010.html#JarrasseM10
2127149	Jinying_Zhu,Qining_Wang,Yan_Huang_0007,Long_Wang	2011	Adding compliant joints and segmented foot to bio-inspired below-knee exoskeleton.	db/conf/icra/icra2011.html#ZhuWHW11
2127174	Richard_Beranek,Mojtaba_Ahmadi	2012	A behavior based locomotion controller with learning for disturbance compensation in bipedal robots.	db/conf/icra/icra2012.html#BeranekA12
2127181	Byeong-Sang_Kim,Jae-Bok_Song	2011	Object grasping using a 1 DOF variable stiffness gripper actuated by a hybrid variable stiffness actuator.	db/conf/icra/icra2011.html#KimS11
2127185	Leslie_Pack_Kaelbling,rez	2012	Unifying perception, estimation and action for mobile manipulation via belief space planning.	db/conf/icra/icra2012.html#KaelblingL12
2127191	Matthew_Turpin,Nathan_Michael,Vijay_Kumar_0001	2012	Decentralized formation control with variable shapes for aerial robots.	db/conf/icra/icra2012.html#TurpinMK12
2127200	Wataru_Takano,Yoshihiko_Nakamura	2012	Bigram-based natural language model and statistical motion symbol model for scalable language of humanoid robots.	db/conf/icra/icra2012.html#TakanoN12
2127206	Jingjin_Yu,Steven_M._LaValle	2010	Probabilistic shadow information spaces.	db/conf/icra/icra2010.html#YuL10
2127208	Nicolas_Schmit,Masafumi_Okada	2012	Simultaneous optimization of robot trajectory and nonlinear springs to minimize actuator torque.	db/conf/icra/icra2012.html#SchmitO12
2127221	Shaowei_Zhang,Jiancheng_Yu,Aiqun_Zhang,Fumin_Zhang	2011	Steady three dimensional gliding motion of an underwater glider.	db/conf/icra/icra2011.html#ZhangYZZ11
2127222	Ioannis_Poulakakis	2010	Spring Loaded Inverted Pendulum embedding: Extensions toward the control of compliant running robots.	db/conf/icra/icra2010.html#Poulakakis10
2127226	Sudeep_Sundaram,Walterio_W._Mayol-Cuevas	2012	What are we doing here? Egocentric activity recognition on the move for contextual mapping.	db/conf/icra/icra2012.html#SundaramM12
2127242	Yu_Song,Qingling_Li,Yifei_Kang,Yongduan_Song	2012	CFastSLAM: A new Jacobian free solution to SLAM problem.	db/conf/icra/icra2012.html#SongLKS12
2127243	Paulo_Drews_Jr.,ez_Trujillo,Rui_P._Rocha,Mario_Fernando_Montenegro_Campos,Jorge_Dias	2010	Novelty detection and 3D shape retrieval using superquadrics and multi-scale sampling for autonomous mobile robots.	db/conf/icra/icra2010.html#DrewsTRCD10
2127246	Li_Zhang,Jeffrey_C._Trinkle	2012	The application of particle filtering to grasping acquisition with visual occlusion and tactile sensing.	db/conf/icra/icra2012.html#ZhangT12
2127263	Martin_Grimmer,Seyfarth	2011	Stiffness adjustment of a Series Elastic Actuator in an ankle-foot prosthesis for walking and running: The trade-off between energy and peak power optimization.	db/conf/icra/icra2011.html#GrimmerS11
2127275	Kevin_Weekly,Leah_Anderson,Andrew_Tinka,Alexandre_M._Bayen	2011	Autonomous river navigation using the Hamilton-Jacobi framework for underactuated vehicles.	db/conf/icra/icra2011.html#WeeklyATB11
2127277	Chi-Tsun_Cheng,Kia_Fallahi,Henry_Leung,Chi_Kong_Tse	2010	An AUVs path planner using genetic algorithms with a deterministic crossover operator.	db/conf/icra/icra2010.html#ChengFLT10
2127283	Maxime_Gautier,Pierre-Olivier_Vandanjon,Alexandre_Janot	2011	Dynamic identification of a 6 dof robot without joint position data.	db/conf/icra/icra2011.html#GautierVJ11
2127285	Hee-Byoung_Choi,Jeha_Ryu	2012	Convex hull-based power manipulability analysis of robot manipulators.	db/conf/icra/icra2012.html#ChoiR12
2127301	Amod_Jog,Brandon_Itkowitz,May_Liu,Simon_P._DiMaio,Gregory_D._Hager,Myriam_Curet,Rajesh_Kumar_0001	2011	Towards integrating task information in skills assessment for dexterous tasks in surgery and simulation.	db/conf/icra/icra2011.html#JogILDHCK11
2127309	Sebastian_Brechtel,Tobias_Gindele,diger_Dillmann	2010	Recursive importance sampling for efficient grid-based occupancy filtering in dynamic environments.	db/conf/icra/icra2010.html#BrechtelGD10
2127317	Yiping_Liu,Patrick_M._Wensing,David_E._Orin,James_P._Schmiedeler	2011	Fuzzy controlled hopping in a biped robot.	db/conf/icra/icra2011.html#LiuWOS11
2127324	Chao_X._Guo,Faraz_M._Mirzaei,Stergios_I._Roumeliotis	2012	An analytical least-squares solution to the odometer-camera extrinsic calibration problem.	db/conf/icra/icra2012.html#GuoMR12
2127328	Kevin_C._Wolfe,Matthew_Moses,Michael_Dennis_Mays_Kutzer,Gregory_S._Chirikjian	2012	M	db/conf/icra/icra2012.html#WolfeMKC12
2127360	Aaron_R._Enes,Wayne_J._Book	2011	Recursive algorithm for motion primitive estimation.	db/conf/icra/icra2011.html#EnesB11
2127363	Elena_Leah_Glassman,Alexis_Lussier_Desbiens,Mark_M._Tobenkin,Mark_R._Cutkosky,Russ_Tedrake	2012	Region of attraction estimation for a perching aircraft: A Lyapunov method exploiting barrier certificates.	db/conf/icra/icra2012.html#GlassmanDTCT12
2127366	John_Mullane,Ba-Ngu_Vo,Martin_David_Adams	2010	Rao-Blackwellised PHD SLAM.	db/conf/icra/icra2010.html#MullaneVA10
2127380	Malcolm_Ryan	2010	Constraint-based multi-robot path planning.	db/conf/icra/icra2010.html#Ryan10
2127391	Johann_Prankl,Michael_Zillich,Markus_Vincze	2011	3D piecewise planar object model for robotics manipulation.	db/conf/icra/icra2011.html#PranklZV11
2127393	Gijs_van_Oort,Raffaella_Carloni,Dian_J._Borgerink,Stefano_Stramigioli	2011	An energy efficient knee locking mechanism for a dynamically walking robot.	db/conf/icra/icra2011.html#OortCBS11
2127394	Xuan_Song,Xiaowei_Shao,Quanshi_Zhang,Ryosuke_Shibasaki,Huijing_Zhao,Hongbin_Zha	2012	Laser-based intelligent surveillance and abnormality detection in extremely crowded scenarios.	db/conf/icra/icra2012.html#SongSZSZZ12
2127399	Sandeep_Chinchali,Scott_C._Livingston,Ufuk_Topcu,Joel_W._Burdick,Richard_M._Murray	2012	Towards formal synthesis of reactive controllers for dexterous robotic manipulation.	db/conf/icra/icra2012.html#ChinchaliLTBM12
2127400	Johan_Larsson,Mathias_Broxvall,Alessandro_Saffiotti	2010	An evaluation of local autonomy applied to teleoperated vehicles in underground mines.	db/conf/icra/icra2010.html#LarssonBS10
2127402	Mingyang_Li,Anastasios_I._Mourikis	2012	Improving the accuracy of EKF-based visual-inertial odometry.	db/conf/icra/icra2012.html#LiM12
2127415	s,Youcef_Mezouar,s	2011	Homography-based multi-robot control with a flying camera.	db/conf/icra/icra2011.html#Lopez-NicolasMS11
2127436	Dimitar_Nikolaev_Dimitrov,Antonio_Paolillo,Pierre-Brice_Wieber	2011	-norm penalty formulations.	db/conf/icra/icra2011.html#DimitrovPW11
2127449	Shinichiro_Narita,Masatsugu_Otsuki,Sachiko_Wakabayashi,Shinichiro_Nishida	2011	Terramechanics evaluation of low-pressure wheel on deformable terrain.	db/conf/icra/icra2011.html#NaritaOWN11
2127452	Roberto_Lampariello,Duy_Nguyen-Tuong,Claudio_Castellini,Gerd_Hirzinger,Jan_Peters_0001	2011	Trajectory planning for optimal robot catching in real-time.	db/conf/icra/icra2011.html#LamparielloNCHP11
2127454	Mikael_Svenstrup,Thomas_Bak,rgen_Andersen	2011	Minimising computational complexity of the RRT algorithm a practical approach.	db/conf/icra/icra2011.html#SvenstrupBA11
2127478	Subhrajit_Bhattacharya,Hordur_Kristinn_Heidarsson,Gaurav_S._Sukhatme,Vijay_Kumar_0001	2011	Cooperative control of autonomous surface vehicles for oil skimming and cleanup.	db/conf/icra/icra2011.html#BhattacharyaHSK11
2127481	Bojun_Ma,Hao_Li,Said_Zahrai,Hui_Zhang	2011	Virtual prototyping for drive chain optimization in an industrial robot.	db/conf/icra/icra2011.html#MaLZZ11
2127488	Guoliang_Liu,tter,Irene_Markelic	2011	Lane shape estimation using a Partitioned Particle filter for autonomous driving.	db/conf/icra/icra2011.html#LiuWM11
2127490	Wei_Xu,Qiang_Huang,Jing_Li,Zhangguo_Yu,Xuechao_Chen,Qian_Xu	2011	An improved ZMP trajectory design for the biped robot BHR.	db/conf/icra/icra2011.html#XuHLYCX11
2127495	Yisheng_Guan,Xuefeng_Zhou,Haifei_Zhu,Li_Jiang,Chuanwu_Cai,Xianmin_Zhang,Hong_Zhang	2011	A novel 6-DoF biped active walking robot - Walking gaits, patterns and experiments.	db/conf/icra/icra2011.html#GuanZZJCZZ11
2127498	Rachana_A._Gupta,Wesley_E._Snyder,W._Shepherd_Pitts	2010	Concurrent visual multiple lane detection for autonomous vehicles.	db/conf/icra/icra2010.html#GuptaSP10
2127499	Yangming_Li,Edwin_B._Olson	2010	Extracting general-purpose features from LIDAR data.	db/conf/icra/icra2010.html#LiO10
2127500	Weifu_Wang,Devin_J._Balkcom	2012	Analytical time-optimal trajectories for an omni-directional vehicle.	db/conf/icra/icra2012.html#WangB12
2127507	Satoshi_Iwaki,Hiroshi_Morimasa,Toshiro_Noritsugu,Minoru_Kobayashi	2011	Contactless manipulation of an object on a plane surface using multiple air jets.	db/conf/icra/icra2011.html#IwakiMNK11
2127513	Oleg_Naroditsky,Alexander_Patterson,Kostas_Daniilidis	2011	Automatic alignment of a camera with a line scan LIDAR system.	db/conf/icra/icra2011.html#NaroditskyPD11
2127519	Taro_Nakamura,K._Sato	2010	Locomotion strategies for an omni-directional mobile robot using traveling waves propagation.	db/conf/icra/icra2010.html#NakamuraS10
2127541	Nicolas_Perrin,Olivier_Stasse,Florent_Lamiraux,Eiichi_Yoshida	2010	Approximation of feasibility tests for reactive walk on HRP-2.	db/conf/icra/icra2010.html#PerrinSLY10
2127542	Gianluca_Antonelli,Andrea_Caiti,Ã²,Stefano_Chiaverini	2010	Designing behaviors to improve observability for relative localization of AUVs.	db/conf/icra/icra2010.html#AntonelliCCC10
2127544	Martin_P._Parsley,Simon_J._Julier	2011	Exploiting prior information in GraphSLAM.	db/conf/icra/icra2011.html#ParsleyJ11
2127551	Werner_Maier,Fengqing_Bao,Elmar_Mair,Eckehard_G._Steinbach,Darius_Burschka	2010	Illumination-invariant image-based novelty detection in a cognitive mobile robot's environment.	db/conf/icra/icra2010.html#MaierBMSB10
2127552	Chad_C._Kessens,Daniel_Carlton_Smith,Philip_R._Osteen	2012	A framework for autonomous self-righting of a generic robot on sloped planar surfaces.	db/conf/icra/icra2012.html#KessensSO12
2127568	Konstantinos_Karydis,Luis_Valbuena,Herbert_G._Tanner	2012	Model predictive navigation for position and orientation control of nonholonomic vehicles.	db/conf/icra/icra2012.html#KarydisVT12
2127569	Silvia_Ferrari,Greg_Foderaro	2010	A potential field approach to finding minimum-exposure paths in wireless sensor networks.	db/conf/icra/icra2010.html#FerrariF10
2127572	Jivko_Sinapov,Alexander_Stoytchev	2011	Object category recognition by a humanoid robot using behavior-grounded relational learning.	db/conf/icra/icra2011.html#SinapovS11
2127576	Xiaoxia_Huang,Ian_D._Walker,Stan_Birchfield	2012	Occlusion-aware reconstruction and manipulation of 3D articulated objects.	db/conf/icra/icra2012.html#HuangWB12
2127586	Nora_Ayanian,Vijay_Kumar_0001	2010	Abstractions and controllers for groups of robots in environments with obstacles.	db/conf/icra/icra2010.html#AyanianK10
2127587	John_Oluwagbemiga_Oyekan,Huosheng_Hu	2010	Bacteria controller implementation on a physical platform for pollution monitoring.	db/conf/icra/icra2010.html#OyekanH10
2127613	Chen-Han_Hsiao,Chieh-Chih_Wang	2011	Achieving undelayed initialization in monocular SLAM with generalized objects using velocity estimate-based classification.	db/conf/icra/icra2011.html#HsiaoW11
2127615	Dominik_Joho,Wolfram_Burgard	2010	Searching for objects: Combining multiple cues to object locations using a maximum entropy model.	db/conf/icra/icra2010.html#JohoB10
2127619	Thomas_Nierhoff,Omiros_Kourakos,Sandra_Hirche	2011	Playing pool with a dual-armed robot.	db/conf/icra/icra2011.html#NierhoffKH11
2127620	Alexander_Herzog,Peter_Pastor,Mrinal_Kalakrishnan,Ludovic_Righetti,Tamim_Asfour,Stefan_Schaal	2012	Template-based learning of grasp selection.	db/conf/icra/icra2012.html#HerzogPKRAS12
2127636	Gilberto_Echeverria,Nicolas_Lassabe,Arnaud_Degroote,verin_Lemaignan	2011	Modular open robots simulation engine: MORSE.	db/conf/icra/icra2011.html#EcheverriaLDL11
2127656	Zhuohua_Lin,Munenori_Uemura,Massimiliano_Zecca,Salvatore_Sessa,Hiroyuki_Ishii,Luca_Bartolomeo,Kazuko_Itoh,Morimasa_Tomikawa,Makoto_Hashizume,Atsuo_Takanishi	2011	Waseda Bioinstrumentation system WB-3 as a wearable tool for objective laparoscopic skill evaluation.	db/conf/icra/icra2011.html#LinUZSIBITHT11
2127657	David_Wooden,Matthew_Malchano,Kevin_Blankespoor,Andrew_Howard,Alfred_A._Rizzi,Marc_Raibert	2010	Autonomous navigation for BigDog.	db/conf/icra/icra2010.html#WoodenMBHRR10
2127679	Tim_C._Lueth,Thomas_Wenger,Alexander_Rautenberg,Herbert_Deppe	2011	RoboDent and the change of needs in computer aided dental implantology during the past ten years.	db/conf/icra/icra2011.html#LuethWRD11
2127682	Oliver_Weede,nnich,ller-Stich,rn	2011	An intelligent and autonomous endoscopic guidance system for minimally invasive surgery.	db/conf/icra/icra2011.html#WeedeMMW11
2127686	Maarja_Kruusmaa,Gert_Toming,Taavi_Salumae,Jaas_Jezov,Andres_Ernits	2011	Swimming speed control and on-board flow sensing of an artificial trout.	db/conf/icra/icra2011.html#KruusmaaTSJE11
2127698	Jeremy_Ma,Joel_W._Burdick	2010	Dynamic sensor planning with stereo for model identification on a mobile platform.	db/conf/icra/icra2010.html#MaB10a
2127701	Ali_Kamali_Eigoli,G._R._Vossoughi	2011	Friction drive microrobots: Dynamic analysis and performance evaluation.	db/conf/icra/icra2011.html#EigoliV11
2127708	Lionel_Clavien,Michel_Lauria,ois_Michaud	2010	Instantaneous centre of rotation estimation of an omnidirectional mobile robot.	db/conf/icra/icra2010.html#ClavienLM10
2127710	Masataku_Sutoh,Kenji_Nagaoka,Keiji_Nagatani,Kazuya_Yoshida	2012	Evaluation of influence of surface shape of locomotion mechanism on traveling performance of planetary rovers.	db/conf/icra/icra2012.html#SutohNNY12
2127716	Rakesh_Murthy,Dan_O._Popa	2010	Millimeter-scale microrobots for wafer-level factories.	db/conf/icra/icra2010.html#MurthyP10
2127717	Chao_Gao,John_R._Spletzer	2010	On-line calibration of multiple LIDARs on a mobile vehicle platform.	db/conf/icra/icra2010.html#GaoS10
2127738	Dal_Hyung_Kim,Paul_Seung_Soo_Kim,A._Agung_Julius,MinJun_Kim_0001	2012	Three-dimensional control of engineered motile cellular microrobots.	db/conf/icra/icra2012.html#KimKJK12
2127745	Todd_Hester,Michael_Quinlan,Peter_Stone	2012	RTMBA: A Real-Time Model-Based Reinforcement Learning Architecture for robot control.	db/conf/icra/icra2012.html#HesterQS12
2127746	Koushil_Sreenath,Hae-Won_Park,J._W._Grizzle	2012	Design and experimental implementation of a compliant hybrid zero dynamics controller with active force control for running on MABEL.	db/conf/icra/icra2012.html#SreenathPG12
2127753	Yan_Liang_Zhang,Yong_Zhang,Changhai_Ru,Patrick_Woo,Mitsuhiro_Nakamura,David_Hoyle,Ian_Cotton,Yu_Sun_0001	2011	A compact closed-loop nanomanipulation system in scanning electron microscope.	db/conf/icra/icra2011.html#ZhangZRWNHCS11
2127755	Kun_Yu,Leng-Feng_Lee,Chin_Pei_Tang,Venkat_Krovi	2010	Enhanced trajectory tracking control with active lower bounded stiffness control for cable robot.	db/conf/icra/icra2010.html#YuLTK10
2127756	Eric_Martinson,Benjamin_R._Fransen	2011	Dynamically reconfigurable microphone arrays.	db/conf/icra/icra2011.html#MartinsonF11
2127759	Stefano_Palagi,Virginia_Pensabene,Lucia_Beccai,Barbara_Mazzolai,Arianna_Menciassi,Paolo_Dario	2011	Design and development of a soft magnetically-propelled swimming microrobot.	db/conf/icra/icra2011.html#PalagiPBMMD11
2127767	Jochen_Welle,Dirk_Schulz,Thomas_Bachran,Armin_B._Cremers	2010	Optimization techniques for laser-based 3D particle filter SLAM.	db/conf/icra/icra2010.html#WelleSBC10
2127773	Yi_Zheng,Hai_Qiu,Ran_Niu,Shaoyuan_Li	2011	Time-space transform based Model Predictive Control for accelerated and controlled cooling process.	db/conf/icra/icra2011.html#ZhengQNL11
2127778	Jwu-Sheng_Hu,Yung-Jung_Chang	2011	Calibration of an eye-to-hand system using a laser pointer on hand and planar constraints.	db/conf/icra/icra2011.html#HuC11
2127780	Julius_Kammerl,Nico_Blodow,Radu_Bogdan_Rusu,Suat_Gedikli,Michael_Beetz,Eckehard_G._Steinbach	2012	Real-time compression of point cloud streams.	db/conf/icra/icra2012.html#KammerlBRGBS12
2127788	Bernd_Finkemeyer,ger,Friedrich_M._Wahl	2010	The adaptive selection matrix - A key component for sensor-based control of robotic manipulators.	db/conf/icra/icra2010.html#FinkemeyerKW10
2127792	Carl_Case,Bipin_Suresh,Adam_Coates,Andrew_Y._Ng	2011	Autonomous sign reading for semantic mapping.	db/conf/icra/icra2011.html#CaseSCN11
2127794	Min_Li,Hongbin_Liu,Jichun_Li,Lakmal_D._Seneviratne,Kaspar_Althoefer	2012	Tissue stiffness simulation and abnormality localization using pseudo-haptic feedback.	db/conf/icra/icra2012.html#LiLLSA12
2127806	Alois_Unterholzner,Michael_Himmelsbach,Hans-Joachim_Wuensche	2012	Active perception for autonomous vehicles.	db/conf/icra/icra2012.html#UnterholznerHW12
2127814	Ramon_Sargeant,Lakmal_D._Seneviratne,Kaspar_Althoefer	2012	An investigation of the use of linear polarizers to measure force and torque in optical 6-DOF force/torque sensors for dexterous manipulators.	db/conf/icra/icra2012.html#SargeantSA12
2127818	Hugues_Sert,sy,Wilfrid_Perruquetti	2011	A single landmark based localization algorithm for non-holonomic mobile robots.	db/conf/icra/icra2011.html#SertKP11
2127824	Nunzio_Abbate,Ignazio_Aleo,Adriano_Basile,Carmen_Brigante,Alessandro_Faulisi	2011	Design of an Inertial Motion Module.	db/conf/icra/icra2011.html#AbbateABBF11
2127831	William_Lai,Ashraf-F._Bastawros,Wei_Hong,Soon-Jo_Chung	2012	Fabrication and analysis of planar dielectric elastomer actuators capable of complex 3-D deformation.	db/conf/icra/icra2012.html#LaiBHC12
2127846	Sebastien_Voisembert,Alain_Riwan,Nazih_Mechbal,Barraco	2011	A novel inflatable robot with constant and continuous volume.	db/conf/icra/icra2011.html#VoisembertRMB11
2127847	rkman,Danica_Kragic	2010	Active 3D scene segmentation and detection of unknown objects.	db/conf/icra/icra2010.html#BjorkmanK10
2127860	o_Lobato_Oliveira,khan_Ince,Keisuke_Nakamura,Kazuhiro_Nakadai	2012	Online audio beat tracking for a dancing robot in the presence of ego-motion noise in a real environment.	db/conf/icra/icra2012.html#OliveiraINN12
2127863	Stefan_Roland_Taal,Yoshiyuki_Sankai	2011	Exoskeletal spine and shoulder girdle for full body exoskeletons with human versatility.	db/conf/icra/icra2011.html#TaalS11
2127872	Andreas_Geiger,Frank_Moosmann,Omer_Car,Bernhard_Schuster	2012	Automatic camera and range sensor calibration using a single shot.	db/conf/icra/icra2012.html#GeigerMCS12
2127878	Kazuo_Kiguchi,Yoshiaki_Hayashi	2012	A study of EMG and EEG during perception-assist with an upper-limb power-assist robot.	db/conf/icra/icra2012.html#KiguchiH12
2127903	Michael_W._Hofbaur,tter,rghuber,Gerald_Steinbauer	2010	On-line kinematics reasoning for reconfigurable robot drives.	db/conf/icra/icra2010.html#HofbaurBSS10
2127913	o,ez,Romeo_Ortega,Guillermo_Obregon-Pulido	2010	Position tracking using adaptive control for bilateral teleoperators with time-delays.	db/conf/icra/icra2010.html#NunoBOO10
2127914	Nik_A._Melchior,Reid_G._Simmons	2010	Dimensionality reduction for trajectory learning from demonstration.	db/conf/icra/icra2010.html#MelchiorS10
2127925	Wataru_Takano,Hirotaka_Imagawa,Yoshihiko_Nakamura	2011	Prediction of human behaviors in the future through symbolic inference.	db/conf/icra/icra2011.html#TakanoIN11
2127927	Guy_Hoffman,Gil_Weinberg	2010	Gesture-based human-robot Jazz improvisation.	db/conf/icra/icra2010.html#HoffmanW10
2127930	Eftychios_G._Christoforou	2010	Angular elevation control of robotic kite systems.	db/conf/icra/icra2010.html#Christoforou10
2127937	D._Caleb_Rucker,Robert_J._Webster_III	2011	Computing Jacobians and compliance matrices for externally loaded continuum robots.	db/conf/icra/icra2011.html#RuckerW11
2127941	Axel_Krieger,Iulian_Iordachita,Sang-Eun_Song,Nathan_Bongjoon_Cho,Peter_Guion,Gabor_Fichtinger,Louis_L._Whitcomb	2010	Development and preliminary evaluation of an actuated MRI-compatible robotic device for MRI-guided prostate intervention.	db/conf/icra/icra2010.html#KriegerISCGFW10
2127949	Martin_Lesmana,Dinesh_K._Pai	2011	A biologically inspired controller for fast eye movements.	db/conf/icra/icra2011.html#LesmanaP11
2127953	Rebecca_K._Kramer,Carmel_Majidi,Robert_J._Wood	2011	Wearable tactile keypad with stretchable artificial skin.	db/conf/icra/icra2011.html#KramerMW11
2127962	Thiago_Boaventura_Cunha,Claudio_Semini,Jonas_Buchli,Marco_Frigerio,Michele_Focchi,Darwin_G._Caldwell	2012	Dynamic torque control of a hydraulic quadruped robot.	db/conf/icra/icra2012.html#CunhaSBFFC12
2127963	Nilanjan_Chakraborty,Katia_P._Sycara	2010	Reconfiguration algorithms for mobile robotic networks.	db/conf/icra/icra2010.html#ChakrabortyS10
2127979	Stefano_Palagi,Gioia_Lucarini,Virginia_Pensabene,Alessandro_Levi,Barbara_Mazzolai,Arianna_Menciassi,Lucia_Beccai	2012	Wireless swimming microrobots: Design and development of a 2 DoF magnetic-based system.	db/conf/icra/icra2012.html#PalagiLPLMMB12
2127988	Giancarlo_Troni,James_C._Kinsey,Dana_R._Yoerger,Louis_L._Whitcomb	2012	Field performance evaluation of new methods for in-situ calibration of attitude and doppler sensors for underwater vehicle navigation.	db/conf/icra/icra2012.html#TroniKYW12
2127993	Nikhil_Karnad,Volkan_Isler	2012	Modeling human motion patterns for multi-robot planning.	db/conf/icra/icra2012.html#KarnadI12
2127995	David_Cabecinhas,Roberto_Naldi,Lorenzo_Marconi,Carlos_Silvestre,Rita_Cunha	2010	Robust take-off and landing for a quadrotor vehicle.	db/conf/icra/icra2010.html#CabecinhasNMSC10
2128013	Morgan_Quigley,Alan_T._Asbeck,Andrew_Y._Ng	2011	A low-cost compliant 7-DOF robotic manipulator.	db/conf/icra/icra2011.html#QuigleyAN11
2128033	Mitsuhiro_Kamezaki,Hiroyasu_Iwata,Shigeki_Sugano	2010	A framework of state identification for operational support based on task-phase and attentional-condition identification.	db/conf/icra/icra2010.html#KamezakiIS10
2128038	Gabriel_Agamennoni,Juan_I._Nieto,Eduardo_Mario_Nebot	2011	An outlier-robust Kalman filter.	db/conf/icra/icra2011.html#AgamennoniNN11
2128050	Megha_Gupta,Gaurav_S._Sukhatme	2012	Using manipulation primitives for brick sorting in clutter.	db/conf/icra/icra2012.html#GuptaS12
2128052	Hongkyu_Min,Zhidong_Wang	2011	Design and analysis of Group Escape Behavior for distributed autonomous mobile robots.	db/conf/icra/icra2011.html#MinW11
2128057	sch,Stephan_Weiss,Davide_Scaramuzza,Roland_Siegwart	2010	Vision based MAV navigation in unknown and unstructured environments.	db/conf/icra/icra2010.html#BloschWSS10
2128078	Ken'ichiro_Nagasaka,Yasunori_Kawanami,Satoru_Shimizu,Takashi_Kito,Toshimitsu_Tsuboi,Atsushi_Miyamoto,Tetsuharu_Fukushima,Hideki_Shimomura	2010	Whole-body cooperative force control for a two-armed and two-wheeled mobile robot using Generalized Inverse Dynamics and Idealized Joint Units.	db/conf/icra/icra2010.html#NagasakaKSKTMFS10
2128088	Jung-Jun_Park,Sami_Haddadin,Jae-Bok_Song,ffer	2011	Designing optimally safe robot surface properties for minimizing the stress characteristics of human-robot collisions.	db/conf/icra/icra2011.html#ParkHSA11
2128095	Haitao_Yu,Mantian_Li,Hegao_Cai	2012	Approximating the stance map of the SLIP runner based on perturbation approach.	db/conf/icra/icra2012.html#YuLC12
2128100	James_Calusdian,Xiaoping_Yun,Eric_R._Bachmann	2011	Adaptive-gain complementary filter of inertial and magnetic data for orientation estimation.	db/conf/icra/icra2011.html#CalusdianYB11
2128104	Lam_Bui_Quang,Sukhan_Lee	2012	Ray-tracing codec for structured light 3D camera.	db/conf/icra/icra2012.html#QuangL12
2128108	Yusuke_Sugahara,Yusuke_Ikeuchi,Ryo_Suzuki,Yasuhisa_Hirata,Kazuhiro_Kosuge,Yukio_Noguchi,Satoshi_Kikuchi,Yasuaki_P._Kohama	2011	Levitation control of experimental wing-in-ground effect vehicle along Z axis and about roll and pitch axes.	db/conf/icra/icra2011.html#SugaharaISHKNKK11
2128124	ger,Renat_Iskakov,Gerd_Hirzinger	2011	Compensating beating heart motion displayed by a heart motion simulator.	db/conf/icra/icra2011.html#GrogerIH11
2128125	Noppadol_Chadil,Marong_Phadoongsidhi,Kawee_Suwannasit,Poramate_Manoonpong,Pudit_Laksanacharoen	2011	A reconfigurable spherical robot.	db/conf/icra/icra2011.html#ChadilPSML11
2128135	Keith_W._Wait,Michael_Goldfarb	2011	Design and control of a pneumatic quadrupedal walking robot.	db/conf/icra/icra2011.html#WaitG11
2128136	n,Cesar_A._Chavez,Isela_Bonilla,Marco_Mendoza,Luis_A._Raygoza,Ambrocio_Loredo-Flores,Biao_Zhang	2011	Precise industrial robot positioning and path-tracking over large surfaces using non-calibrated vision.	db/conf/icra/icra2011.html#Gonzalez-GalvanCBMRLZ11
2128139	Dimitra_Panagou,Herbert_G._Tanner,Kostas_J._Kyriakopoulos	2010	Dipole-like fields for stabilization of systems with Pfaffian constraints.	db/conf/icra/icra2010.html#PanagouTK10
2128141	Wei_Wang,Yan_Li,Xin_Xu,Simon_X._Yang	2010	An adaptive roadmap guided Multi-RRTs strategy for single query path planning.	db/conf/icra/icra2010.html#WangLXY10
2128151	Belkacem_Bounab,Daniel_Sidobre,Abdelouhab_Zaatri	2010	Performances of the central-axis approach in grasp analysis.	db/conf/icra/icra2010.html#BounabSZ10
2128152	Sebastian_Scherer,Lyle_Chamberlain,Sanjiv_Singh	2012	First results in autonomous landing and obstacle avoidance by a full-scale helicopter.	db/conf/icra/icra2012.html#SchererCS12
2128183	Daniel_Meyer-Delius,Maximilian_Beinhofer,Alexander_Kleiner,Wolfram_Burgard	2011	Using artificial landmarks to reduce the ambiguity in the environment of a mobile robot.	db/conf/icra/icra2011.html#Meyer-DeliusBKB11
2128189	Hung_Vu_Quy,Lijin_Aryananda,Farrukh_Iqbal_Sheikh,Flurin_Casanova,Rolf_Pfeifer	2011	A novel mechanism for varying stiffness via changing transmission angle.	db/conf/icra/icra2011.html#QuyASCP11
2128197	Enrique_J._Bernabeu	2010	Continuous distance computation for motions with constant accelerations.	db/conf/icra/icra2010.html#Bernabeu10
2128201	Masaya_Hagiwara,Tomohiro_Kawahara,Toru_Iijima,Yoko_Yamanishi,Fumihito_Arai	2012	High speed microrobot actuation in a microfluidic chip by levitated structure with riblet surface.	db/conf/icra/icra2012.html#HagiwaraKIYA12
2128208	Alexis_Lussier_Desbiens,Alan_T._Asbeck,Mark_R._Cutkosky	2010	Hybrid aerial and scansorial robotics.	db/conf/icra/icra2010.html#DesbiensAC10
2128209	Ying_Mao,Sunil_Kumar_Agrawal	2012	Transition from mechanical arm to human arm with CAREX: A cable driven ARm EXoskeleton (CAREX) for neural rehabilitation.	db/conf/icra/icra2012.html#MaoA12
2128218	Kiju_Lee,Gregory_S._Chirikjian	2010	An autonomous robot that duplicates itself from low-complexity components.	db/conf/icra/icra2010.html#LeeC10
2128223	Varun_Agrawal,William_J._Peine,Bin_Yao,SeungWook_Choi	2010	Control of cable actuated devices using smooth backlash inverse.	db/conf/icra/icra2010.html#AgrawalPYC10
2128227	Ryu_Nakadate,Jorge_Solis,Atsuo_Takanishi,Eiichi_Minagawa,Motoaki_Sugawara,Kiyomi_Niki	2011	Out-of-plane visual servoing method for tracking the carotid artery with a robot-assisted ultrasound diagnostic system.	db/conf/icra/icra2011.html#NakadateSTMSN11
2128228	Nikhil_Karnad,Volkan_Isler	2010	A multi-robot system for unconfined video-conferencing.	db/conf/icra/icra2010.html#KarnadI10
2128230	Jacopo_Aleotti,Dario_Lodi_Rizzini,Stefano_Caselli	2012	Object categorization and grasping by parts from range scan data.	db/conf/icra/icra2012.html#AleottiRC12
2128231	Stephan_Weiss,Markus_Achtelik,Margarita_Chli,Roland_Siegwart	2012	Versatile distributed pose estimation and sensor self-calibration for an autonomous MAV.	db/conf/icra/icra2012.html#WeissACS12
2128238	Jonathan_Binney,Gaurav_S._Sukhatme	2012	Branch and bound for informative path planning.	db/conf/icra/icra2012.html#BinneyS12
2128246	Ferdinan_Widjaja,Cheng_Yap_Shee,Wing_Lok_Au,Philippe_Poignet,Wei_Tech_Ang	2011	Using electromechanical delay for real-time anti-phase tremor attenuation system using Functional Electrical Stimulation.	db/conf/icra/icra2011.html#WidjajaSAPA11
2128249	Andreas_Ruesch,Abeje_Y._Mersha,Stefano_Stramigioli,Raffaella_Carloni	2012	Kinetic scrolling-based position mapping for haptic teleoperation of unmanned aerial vehicles.	db/conf/icra/icra2012.html#RueschMSC12
2128252	Layale_Saab,Nicolas_Mansard,ois_Keith,Jean-Yves_Fourquet,res	2011	Generation of dynamic motion for anthropomorphic systems under prioritized equality and inequality constraints.	db/conf/icra/icra2011.html#SaabMKFS11
2128266	Ryosuke_Kawanishi,Atsushi_Yamashita,Toru_Kaneko,Hajime_Asama	2012	Line-based camera movement estimation by using parallel lines in omnidirectional video.	db/conf/icra/icra2012.html#KawanishiYKA12
2128279	Ilia_G._Polushin,Amir_Takhmar,Rajni_V._Patel	2011	Small-gain design of networked cooperative bilateral teleoperators.	db/conf/icra/icra2011.html#PolushinTP11
2128302	Marco_Cusumano-Towner,Arjun_Singh,Stephen_Miller,James_F._O'Brien,Pieter_Abbeel	2011	Bringing clothing into desired configurations with limited perception.	db/conf/icra/icra2011.html#Cusumano-TownerSMOA11
2128304	Zhonghua_Xu,Scott_C._Lenaghan,David_Gilmore,Lijin_Xia,Mingjun_Zhang	2012	Automated high throughput scalable green nanomanufacturing for naturally occurring nanoparticles using English ivy.	db/conf/icra/icra2012.html#XuLGXZ12
2128306	Jonathan_Binney,Andreas_Krause_0001,Gaurav_S._Sukhatme	2010	Informative path planning for an autonomous underwater vehicle.	db/conf/icra/icra2010.html#BinneyKS10
2128311	Ã­	2012	A model and formal analysis of Braitenberg vehicles 2 and 3.	db/conf/icra/icra2012.html#Rani12
2128313	Ko_Yamamoto,Masafumi_Okada	2011	Continuum model of crossing pedestrian flows and swarm control based on temporal/spatial frequency.	db/conf/icra/icra2011.html#YamamotoO11
2128315	Rene_Iser,Arthur_Martens,Friedrich_M._Wahl	2010	Localization of mobile robots using incremental local maps.	db/conf/icra/icra2010.html#IserMW10
2128323	David_Ball,Christopher_F._Lehnert,Gordon_Fraser_Wyeth	2010	A practical implementation of a continuous isotropic spherical omnidirectional drive.	db/conf/icra/icra2010.html#BallLW10
2128333	Evan_Drumwright,Dylan_A._Shell	2011	An evaluation of methods for modeling contact in multibody simulation.	db/conf/icra/icra2011.html#DrumwrightS11
2128341	Aveek_Das,Oleg_Naroditsky,Zhiwei_Zhu,Supun_Samarasekera,Rakesh_Kumar_0001	2010	Robust visual path following for heterogeneous mobile platforms.	db/conf/icra/icra2010.html#DasNZSK10
2128353	Erol_Ozgur,Nicolas_Bouton,Nicolas_Andreff,Philippe_Martinet	2011	Dynamic control of the Quattro robot by the leg edges.	db/conf/icra/icra2011.html#OzgurBAM11
2128365	Marcos_Augusto_M._Vieira,Ramesh_Govindan,Gaurav_S._Sukhatme	2011	Towards autonomous wireless backbone deployment in highly-obstructed environments.	db/conf/icra/icra2011.html#VieiraGS11
2128373	Javier_Alonso-Mora,Andreas_Breitenmoser,Martin_Rufli,Roland_Siegwart,Paul_A._Beardsley	2011	Multi-robot system for artistic pattern formation.	db/conf/icra/icra2011.html#Alonso-MoraBRSB11
2128377	Fabrizio_Flacco,Alessandro_De_Luca_0001	2010	Multiple depth/presence sensors: Integration and optimal placement for human/robot coexistence.	db/conf/icra/icra2010.html#FlaccoL10
2128378	Seng_Keat_Gan,Robert_Fitch,Salah_Sukkarieh	2012	Real-time decentralized search with inter-agent collision avoidance.	db/conf/icra/icra2012.html#GanFS12
2128391	Hao_Ding,Gunther_Reissig,Kurniawan_Wijaya,Dino_Bortot,Klaus_Bengler,Olaf_Stursberg	2011	Human arm motion modeling and long-term prediction for safe and efficient Human-Robot-Interaction.	db/conf/icra/icra2011.html#DingRWBBS11
2128400	David_Meger,Ankur_Gupta_0004,James_J._Little	2010	Viewpoint detection models for sequential embodied object category recognition.	db/conf/icra/icra2010.html#MegerGL10
2128406	Sung-Kyun_Kim,Ji-Hun_Bae,Yonghwan_Oh,Sang-Rok_Oh	2011	Concurrent control of position/orientation of a redundant manipulator based on virtual spring-damper hypothesis.	db/conf/icra/icra2011.html#KimBOO11
2128409	o,Vitor_Pedro,o_Pedro_Barreto_0001	2012	Localization in indoor environments by querying omnidirectional visual maps using perspective images.	db/conf/icra/icra2012.html#LourencoPB12
2128418	Todor_Stoyanov,Martin_Magnusson_0002,Achim_J._Lilienthal	2012	Point set registration through minimization of the L2 distance between 3D-NDT models.	db/conf/icra/icra2012.html#Stoyanov0L12
2128421	Geunho_Lee,Eui-Jung_Jung,Takanori_Ohnuma,Nak_Young_Chong,Byung-Ju_Yi	2011	JAIST Robotic Walker control based on a two-layered Kalman filter.	db/conf/icra/icra2011.html#LeeJOCY11
2128425	Emmanuel_Piat,l_Abadie,Stephane_Oster	2012	Analysis of the trade-off between resolution and bandwidth for a nanoforce sensor based on diamagnetic levitation.	db/conf/icra/icra2012.html#PiatAO12
2128427	Yucong_Lin,Melissa_Bunte,Srikanth_Saripalli,Ronald_Greeley	2012	Autonomous detection of volcanic plumes on outer planetary bodies.	db/conf/icra/icra2012.html#LinBSG12
2128439	Hyung_Seok_Lee,Hyeok_Yong_Kwon,Dae_Gyeong_Kim,Ui_Kyum_Kim,Nguyen_Ngoc_Linh,Nguyen_Canh_Toan,Hyungpil_Moon,Jachoon_Koo,Jea-do_Nam,Hyouk_Ryeol_Choi	2012	SMD pluggable tactile display driven by soft actuator.	db/conf/icra/icra2012.html#LeeKKKLTMKNC12
2128444	Maurice_F._Fallon,Hordur_Johannsson,John_J._Leonard	2012	Efficient scene simulation for robust monte carlo localization using an RGB-D camera.	db/conf/icra/icra2012.html#FallonJL12
2128457	Yong_Liu,Yunyi_Jia,Ning_Xi	2010	Dynamic model and adaptive tracking controller for 4-Powered Caster Vehicle.	db/conf/icra/icra2010.html#LiuJX10
2128461	Salvatore_Candido,Seth_Hutchinson	2011	Minimum uncertainty robot navigation using information-guided POMDP planning.	db/conf/icra/icra2011.html#CandidoH11
2128482	bastien_Krut,Michel_Benoit,Etienne_Dombre,ois_Pierrot	2010	MoonWalker, a lower limb exoskeleton able to sustain bodyweight using a passive force balancer.	db/conf/icra/icra2010.html#KrutBDP10
2128487	Charles_Bibby,Ian_D._Reid_0001	2010	A hybrid SLAM representation for dynamic marine environments.	db/conf/icra/icra2010.html#BibbyR10
2128510	Kwang_Ho_An,Myung_Jin_Chung	2010	Learning discriminative MspLBP features based on Ada-LDA for multi-class pattern classification.	db/conf/icra/icra2010.html#AnC10a
2128518	Mariana_C._Bernardes,Bruno_Vilhena_Adorno,Philippe_Poignet,Geovany_Araujo_Borges	2012	Semi-automatic needle steering system with robotic manipulator.	db/conf/icra/icra2012.html#BernardesAPB12
2128520	Byeong-Kyu_Lee,Hee-Don_Lee,Ji_Yeong_Lee,Kyoosik_Shin,Jung-Soo_Han,Chang-Soo_Han	2012	Development of dynamic model-based controller for upper limb exoskeleton robot.	db/conf/icra/icra2012.html#LeeLLSHH12
2128530	Clifford_McKenzie,Aaron_Parness	2012	Video summary of D.R.O.P. the Durable Reconnaissance and Observation Platform.	db/conf/icra/icra2012.html#McKenzieP12
2128534	Abeje_Y._Mersha,Stefano_Stramigioli,Raffaella_Carloni	2012	Bilateral teleoperation of underactuated unmanned aerial vehicles: The virtual slave concept.	db/conf/icra/icra2012.html#MershaSC12
2128542	Tom_Carlson,Yiannis_Demiris	2010	Increasing robotic wheelchair safety with collaborative control: Evidence from secondary task experiments.	db/conf/icra/icra2010.html#CarlsonD10
2128544	Meng_Song,Fengchi_Sun,Karl_Iagnemma	2012	Natural landmark extraction in cluttered forested environments.	db/conf/icra/icra2012.html#SongSI12
2128547	rgen_Sturm,Kurt_Konolige,Cyrill_Stachniss,Wolfram_Burgard	2010	Vision-based detection for learning articulation models of cabinet doors and drawers in household environments.	db/conf/icra/icra2010.html#SturmKSB10
2128549	Byoung-gi_Lee,Hyun-dong_Kim,JongSuk_Choi,Seyun_Kim,Nam_Ik_Cho	2010	DSP integration of sound source localization and multi-channel Wiener filter.	db/conf/icra/icra2010.html#LeeKCKC10
2128557	Andrew_J._Barry,Anirudha_Majumdar,Russ_Tedrake	2012	Safety verification of reactive controllers for UAV flight in cluttered environments using barrier certificates.	db/conf/icra/icra2012.html#BarryMT12
2128560	Tomomi_Nagasaka,Kanji_Tanaka	2011	Dictionary-based map compression for sparse feature maps.	db/conf/icra/icra2011.html#TomomiK11
2128571	Christopher_J._Payne,Win_Tun_Latt,Guang-Zhong_Yang	2012	A new hand-held force-amplifying device for micromanipulation.	db/conf/icra/icra2012.html#PayneLY12
2128574	Mark_Albert_Whitty,E._Guivant	2011	Efficient global path planning during dense map deformation.	db/conf/icra/icra2011.html#WhittyG11
2128582	Weiming_Li,Youfu_Li,Zhongwei_Li,D._Sun,Beiwei_Zhang	2011	Generic radial distortion calibration of a novel single camera based panoramic stereoscopic system.	db/conf/icra/icra2011.html#LiLLSZ11
2128589	-Maurin,Bernard_Bayle,Jacques_Gangloff	2011	Force feedback teleoperation with periodical disturbance compensation.	db/conf/icra/icra2011.html#Joinie-MaurinBG11
2128594	Hidefumi_Wakamatsu,Eiji_Morinaga,Eiji_Arai,Shinichi_Hirai	2012	Path planning for belt object manipulation.	db/conf/icra/icra2012.html#WakamatsuMAH12
2128595	Daniel_Kubus,David_Inkermann,Thomas_Vietor,Friedrich_M._Wahl	2011	Joint actuation based on highly dynamic torque transmission elements - concept and control approaches.	db/conf/icra/icra2011.html#KubusIVW11
2128597	Muhammad_Umer_Khan,Ibrar_ullah_Jan,Abrar_Ahmed,M._Ajmal_Azad,Naeem_Iqbal	2011	Uncalibrated Visual Servo control with multi-constraint satisfaction.	db/conf/icra/icra2011.html#KhanJAAI11
2128601	Lorenzo_Masia,Valentina_Squeri,Giulio_Sandini,Pietro_G._Morasso	2012	Measuring end-point stiffness by means of a modular mechatronic system.	db/conf/icra/icra2012.html#MasiaSSM12
2128605	Nicolas_Gorges,Stefan_Escaida_Navarro,Dirk_Goger,rn	2010	Haptic object recognition using passive joints and haptic key features.	db/conf/icra/icra2010.html#GorgesNGW10
2128606	Asako_Kanezaki,Takahiro_Suzuki,Tatsuya_Harada,Yasuo_Kuniyoshi	2011	Fast object detection for robots in a cluttered indoor environment using integral 3D feature table.	db/conf/icra/icra2011.html#KanezakiSHK11
2128640	Seung-kook_Yun,Daniela_Rus	2012	Distributed coverage with mobile robots on a graph: Locational optimization.	db/conf/icra/icra2012.html#YunR12
2128651	Dai_Owaki,Masatoshi_Koyama,Shin'ichi_Yamaguchi,Shota_Kubo,Akio_Ishiguro	2010	A two-dimensional passive dynamic running biped with knees.	db/conf/icra/icra2010.html#OwakiKYKI10
2128655	Jeremy_S._Lewis,Jason_M._O'Kane	2010	Guaranteed navigation with an unreliable blind robot.	db/conf/icra/icra2010.html#LewisO10
2128657	Weiwei_Wan,Rui_Fukui,Masamichi_Shimosaka,Tomomasa_Sato,Yasuo_Kuniyoshi	2012	Grasping by caging: A promising tool to deal with uncertainty.	db/conf/icra/icra2012.html#WanFSSK12a
2128660	Yannick_Morel,Mathieu_Porez,Auke_Jan_Ijspeert	2012	Estimation of relative position and coordination of mobile underwater robotic platforms through electric sensing.	db/conf/icra/icra2012.html#MorelPI12
2128664	Kostas_Vlachos,Evangelos_Papadopoulos	2010	Control design and allocation of an over-actuated triangular floating platform.	db/conf/icra/icra2010.html#VlachosP10
2128669	Hideyuki_Tsukagoshi,Nobuyuki_Arai,Ichiro_Kiryu,Ato_Kitagawa	2011	Smooth creeping actuator by tip growth movement aiming for search and rescue operation.	db/conf/icra/icra2011.html#TsukagoshiAKK11
2128670	Nicolas_Riehl,Marc_Gouttefarde,dric_Baradat,ois_Pierrot	2010	On the determination of cable characteristics for large dimension cable-driven parallel mechanisms.	db/conf/icra/icra2010.html#RiehlGBP10
2128688	Yuto_Nakanishi,Kazuo_Hongo,Ikuo_Mizuuchi,Masayuki_Inaba	2010	Joint proprioception acquisition strategy based on joints-muscles topological maps for musculoskeletal humanoids.	db/conf/icra/icra2010.html#NakanishiHMI10
2128696	Tue-Cuong_Dong-Si,Anastasios_I._Mourikis	2011	Motion tracking with fixed-lag smoothing: Algorithm and consistency analysis.	db/conf/icra/icra2011.html#Dong-SiM11
2128705	Daisuke_Sawada,Ryuta_Ozawa	2012	Joint control of tendon-driven mechanisms with branching tendons.	db/conf/icra/icra2012.html#SawadaO12
2128706	Matei_T._Ciocarlie,Peter_K._Allen	2010	Data-driven optimization for underactuated robotic hands.	db/conf/icra/icra2010.html#CiocarlieA10
2128711	Weihai_Chen,Xiaomei_Zhang,Teck_Chew_Ng	2011	Vehicle following algorithm realization based on a virtual flexible curved bar with force delay.	db/conf/icra/icra2011.html#ChenZN11
2128721	Matko_Orsag,Stjepan_Bogdan,Tomislav_Haus,Marko_Bunic,Antonio_Krnjak	2011	Modeling, simulation and control of a spincopter.	db/conf/icra/icra2011.html#OrsagBHBK11
2128733	Guoquan_Huang,Ke_X._Zhou,Nikolas_Trawny,Stergios_I._Roumeliotis	2011	Bearing-only target tracking using a bank of MAP estimators.	db/conf/icra/icra2011.html#HuangZTR11
2128737	Mingyen_Ho,Jaydev_P._Desai	2012	Towards the development of a SMA-actuated MRI-compatible tendon-driven neurosurgical robot.	db/conf/icra/icra2012.html#HoD12
2128745	Binh_Nguyen,Jeff_Trinkle	2010	Modeling non-convex configuration space using linear complementarity problems.	db/conf/icra/icra2010.html#NguyenT10
2128756	Damion_D._Dunlap,Wei_Yu,Emmanuel_G._Collins_Jr.,Charmane_V._Caldwell	2011	Motion planning for steep hill climbing.	db/conf/icra/icra2011.html#DunlapYCC11
2128758	Stephen_Williams,Ayanna_M._Howard	2011	Horizon line estimation in glacial environments using multiple visual cues.	db/conf/icra/icra2011.html#WilliamsH11
2128762	Ivan_Dryanovski,Carlos_Jaramillo,Jizhong_Xiao	2012	Incremental registration of RGB-D images.	db/conf/icra/icra2012.html#DryanovskiJX12
2128765	Mahmut_Selman_Sakar,Edward_B._Steager,A._Agung_Julius,MinJun_Kim_0001,Vijay_Kumar_0001,George_J._Pappas	2010	Biosensing and actuation for microbiorobots.	db/conf/icra/icra2010.html#SakarSJKKP10
2128773	Olivier_Kermorgant,ois_Chaumette	2011	Multi-sensor data fusion in sensor-based control: Application to multi-camera visual servoing.	db/conf/icra/icra2011.html#KermorgantC11
2128788	Otar_Akanyeti,Andres_Ernits,Maria-Camilla_Fiazza,Gert_Toming,Guntis_Kulikovskis,Madis_Listak,Rasmus_Raag,Taavi_Salumae,Paolo_Fiorini,Maarja_Kruusmaa	2010	Myometry-driven compliant-body design for underwater propulsion.	db/conf/icra/icra2010.html#AkanyetiEFTKLRSFK10
2128795	Yan_Zhuang,Yunhui_Li,Wei_Wang_0036	2011	Robust indoor scene recognition based on 3D laser scanning and Bearing Angle image.	db/conf/icra/icra2011.html#ZhuangLW11
2128796	Alexander_Dietrich,ffer,Gerd_Hirzinger	2012	On continuous null space projections for torque-based, hierarchical, multi-objective manipulation.	db/conf/icra/icra2012.html#DietrichAH12
2128797	Nawid_Jamali,Claude_Sammut	2010	Material classification by tactile sensing using surface textures.	db/conf/icra/icra2010.html#JamaliS10
2128807	Ewoud_Frank_van_West,Akio_Yamamoto,Toshiro_Higuchi	2010	Using tilt-control in non-contact manipulation systems: Development of 2-DOF tilting actuator with remote center of rotation.	db/conf/icra/icra2010.html#WestYH10
2128809	Sachin_Chitta,Matthew_Piccoli,rgen_Sturm	2010	Tactile object class and internal state recognition for mobile manipulation.	db/conf/icra/icra2010.html#ChittaPS10
2128812	Lounell_B._Gueta,Jia_Cheng,Ryosuke_Chiba,Tamio_Arai,Tsuyoshi_Ueyama,Jun_Ota	2011	Multiple-goal task realization utilizing redundant degrees of freedom of task and tool attachment optimization.	db/conf/icra/icra2011.html#GuetaCCAUO11
2128828	Amer_Agovic,Joseph_Levine,Amrudin_Agovic,Nikolaos_Papanikolopoulos	2011	Computer vision issues in the design of a scrub nurse robot.	db/conf/icra/icra2011.html#AgovicLAP11
2128833	Philipp_Reist,Russ_Tedrake	2010	Simulation-based LQR-trees with input and state constraints.	db/conf/icra/icra2010.html#ReistT10
2128836	Sam_Ade_Jacobs,Kasra_Manavi,Juan_Burgos,Jory_Denny,Shawna_L._Thomas,Nancy_M._Amato	2012	A scalable method for parallelizing sampling-based motion planning algorithms.	db/conf/icra/icra2012.html#JacobsMBDTA12
2128842	Seng_Keat_Gan,Salah_Sukkarieh	2011	Multi-UAV target search using explicit decentralized gradient-based negotiation.	db/conf/icra/icra2011.html#GanS11
2128844	Daniel_Schurzig,Robert_F._Labadie,Andreas_Hussong,Thomas_S._Rau,Robert_J._Webster_III	2010	A force sensing Automated Insertion Tool for cochlear electrode implantation.	db/conf/icra/icra2010.html#SchurzigLHRW10
2128847	Adam_Coates,Andrew_Y._Ng	2010	Multi-camera object detection for robotics.	db/conf/icra/icra2010.html#CoatesN10
2128848	Tak-Kit_Lau,Yunhui_Liu,Kai-wun_Lin	2010	A robust state estimation method against GNSS outage for unmanned miniature helicopters.	db/conf/icra/icra2010.html#LauLL10a
2128850	Keehoon_Kim,Wan_Kyun_Chung,Murat_Cenk_Cavusoglu	2010	Restriction Space Projection method for position sensor based force reflection of multi degrees-of-freedom bilateral teleoperation systems in unstructured environments.	db/conf/icra/icra2010.html#KimCC10
2128865	Timo_Machmer,Alexej_Swerdlow,hn,Kristian_Kroschel	2010	Hierarchical, knowledge-oriented opto-acoustic scene analysis for humanoid robots and man-machine interaction.	db/conf/icra/icra2010.html#MachmerSKK10
2128868	Youngbin_Park,Il_Hong_Suh	2012	Lateral and feedback schemes for the inhibition of false-positive responses in edge orientation channels.	db/conf/icra/icra2012.html#ParkS12
2128881	Brian_J._Thomas,Odest_Chadwicke_Jenkins	2012	RoboFrameNet: Verb-centric semantics for actions in robot middleware.	db/conf/icra/icra2012.html#ThomasJ12
2128892	Chris_Thorne,Nikita_Skorodinski,Hughes_Tipton,Travis_Van_Schoyck,Mark_Yim	2010	Brake design for dynamic modular robots.	db/conf/icra/icra2010.html#ThorneSTSY10
2128901	Marek_Doniec,Iuliu_Vasilescu,Carrick_Detweiler,Daniela_Rus	2010	Complete SE	db/conf/icra/icra2010.html#DoniecVDR10
2128903	Friedrich_Lange,Claudius_Jehle,Michael_Suppa,Gerd_Hirzinger	2012	Revised force control using a compliant sensor with a position controlled robot.	db/conf/icra/icra2012.html#LangeJSH12
2128919	llig,Federico_Augugliaro,Sergei_Lupashin,Raffaello_D'Andrea	2010	Synchronizing the motion of a quadrocopter to music.	db/conf/icra/icra2010.html#SchalligALD10
2128925	kel,Sven_R._Schmidt-Rohr,sch,diger_Dillmann	2010	Representation and constrained planning of manipulation strategies in the context of Programming by Demonstration.	db/conf/icra/icra2010.html#JakelSLD10
2128933	Yu_Tian,Jadav_Das,Nilanjan_Sarkar	2010	Near-optimal autonomous pursuit evasion for nonholonomic wheeled mobile robot subject to wheel slip.	db/conf/icra/icra2010.html#TianDS10
2128935	Xiaolin_Wang,Shuxun_Chen,Dong_Sun	2011	Robot-assisted automatic cell sorting with combined optical tweezer and microfluidic chip technologies.	db/conf/icra/icra2011.html#WangCS11
2128944	Oriol_Bohigas,Michael_E._Henderson,s_Ros,Josep_M._Porta	2012	A singularity-free path planner for closed-chain manipulators.	db/conf/icra/icra2012.html#BohigasHRP12
2128966	Vincent_Lebastard,ric_Boyer,Christine_Chevallereau,l_Servagent	2012	Underwater electro-navigation in the dark.	db/conf/icra/icra2012.html#LebastardBCS12
2128980	Raymond_Oung,ric_Bourgault,Matthew_Donovan,Raffaello_D'Andrea	2010	The Distributed Flight Array.	db/conf/icra/icra2010.html#OungBDD10
2128992	Andrew_Colquhoun_Symington,Sonia_Waharte,Simon_Justin_Julier,Niki_Trigoni	2010	Probabilistic target detection by camera-equipped UAVs.	db/conf/icra/icra2010.html#SymingtonWJT10
2128994	Jae_Heon_Chung,Hyo-Jeong_Cha,Byung-Ju_Yi,Whee_Kuk_Kim	2010	Implementation of a 4-DOF parallel mechanism as a needle insertion device.	db/conf/icra/icra2010.html#ChungCYK10
2128997	Gwang-Pil_Jung,Je-Sung_Koh,Kyu-Jin_Cho	2011	Meso-scale compliant gripper inspired by caterpillar's proleg.	db/conf/icra/icra2011.html#JungKC11
2128998	Guoxuan_Zhang,Dong_Hun_Kang,Il_Hong_Suh	2012	Loop closure through vanishing points in a line-based monocular SLAM.	db/conf/icra/icra2012.html#ZhangKS12
2129004	Shota_Mori,Satoshi_Komada,Junji_Hirai	2011	Development and verification of simple tension distribution considering tension limits for 2-joint arm with 3 pairs of 6 tendons.	db/conf/icra/icra2011.html#MoriKH11
2129009	Hongbo_Wang,Kazuhiro_Kosuge	2012	Understanding and reproducing waltz dancers' body dynamics in physical human-robot interaction.	db/conf/icra/icra2012.html#WangK12
2129011	Motofumi_Kobatake,Takeshi_Takaki,Idaku_Ishii	2012	A real-time micro-PIV system using frame-straddling high-speed vision.	db/conf/icra/icra2012.html#KobatakeTI12
2129013	Haoyao_Chen,Dong_Sun	2012	Automatic flocking manipulation of micro particles with robot-tweezers technologies.	db/conf/icra/icra2012.html#ChenS12
2129015	Daniel_H._Grollman,Aude_Billard	2011	Donut as I do: Learning from failed demonstrations.	db/conf/icra/icra2011.html#GrollmanB11
2129025	Jie_Lei,Xin_Du,Jilin_Liu	2011	A novel rectification framework for coaxial omni-directional stereo.	db/conf/icra/icra2011.html#LeiDL11
2129029	Peter_Pastor,Mrinal_Kalakrishnan,Sachin_Chitta,Evangelos_Theodorou,Stefan_Schaal	2011	Skill learning and task outcome prediction for manipulation.	db/conf/icra/icra2011.html#PastorKCTS11
2129030	Krzysztof_Andrzej_Charusta,Robert_Krug_0002,Dimitar_Dimitrov,Boyko_Iliev	2012	Independent Contact Regions based on a patch contact model.	db/conf/icra/icra2012.html#CharustaKDI12
2129031	Yangming_Li,Edwin_B._Olson	2011	Structure tensors for general purpose LIDAR feature extraction.	db/conf/icra/icra2011.html#LiO11
2129040	Eduardo_Montijano,nez,s	2011	Distributed robust data fusion based on dynamic voting.	db/conf/icra/icra2011.html#MontijanoMS11
2129069	Sven_Schneider,Arman_Melkumyan,Richard_J._Murphy,Eric_Nettleton	2012	A geological perception system for autonomous mining.	db/conf/icra/icra2012.html#SchneiderMMN12
2129074	n_Nagy,Dominic_R._Frutiger,Remco_I._Leine,Christoph_Glocker,Bradley_J._Nelson	2010	Modeling and analysis of wireless resonant magnetic microactuators.	db/conf/icra/icra2010.html#NagyFLGN10
2129077	Mayank_Bansal,Bogdan_Matei,Ben_Southall,Jayan_Eledath,Harpreet_S._Sawhney	2011	A LIDAR streaming architecture for mobile robotics with application to 3D structure characterization.	db/conf/icra/icra2011.html#BansalMSES11
2129092	Robert_Platt,Leslie_Pack_Kaelbling,rez,Russ_Tedrake	2012	Non-Gaussian belief space planning: Correctness and complexity.	db/conf/icra/icra2012.html#PlattKLT12
2129110	Sung-Kyun_Kim,Yonghwan_Oh,Sang-Rok_Oh	2012	Object manipulation in 3d space by two cone-shaped finger robots based on finger-thumb opposability without object sensing.	db/conf/icra/icra2012.html#KimOO12
2129115	James_D._Marble,Kostas_E._Bekris	2012	Towards small asymptotically near-optimal roadmaps.	db/conf/icra/icra2012.html#MarbleB12
2129118	Koji_Ikuta,Yoshikatsu_Matsuda,Daisuke_Yajima,Yusuke_Ota	2010	Precise bending angle control of hydraulic active catheter by pressure pulse drive.	db/conf/icra/icra2010.html#IkutaMYO10
2129119	Robert_Leishman,John_Macdonald,Timothy_W._McLain,Randy_W._Beard	2012	Relative navigation and control of a hexacopter.	db/conf/icra/icra2012.html#LeishmanMMB12
2129121	Bruno_Vilhena_Adorno,nio_Padilha_Lanari_Bo,Philippe_Fraisse,Philippe_Poignet	2011	Towards a cooperative framework for interactive manipulation involving a human and a humanoid.	db/conf/icra/icra2011.html#AdornoBFP11
2129126	Ruben_Smits,Herman_Bruyninckx	2011	Composition of complex robot applications via data flow integration.	db/conf/icra/icra2011.html#SmitsB11
2129129	Andreas_Tobergte,ffer	2012	Direct force reflecting teleoperation with a flexible joint robot.	db/conf/icra/icra2012.html#TobergteA12
2129134	Michel_Dominici,o,o_D._Sousa	2011	Heart motion compensation for robotic-assisted surgery predictive approach vs. active observer.	db/conf/icra/icra2011.html#DominiciCS11
2129136	Sachit_Butail,Derek_A._Paley	2010	3D reconstruction of fish schooling kinematics from underwater video.	db/conf/icra/icra2010.html#ButailP10
2129142	Yang_Liu,Jingshan_Li,Shu-Yin_Chiang	2010	Performance approximation and bottleneck identification in re-entrant lines.	db/conf/icra/icra2010.html#LiuLC10
2129145	Moritz_Kaiser,Bogdan_Kwolek,Christoph_Staub,Gerhard_Rigoll	2010	Registration of 3D facial surfaces using covariance matrix pyramids.	db/conf/icra/icra2010.html#KaiserKSR10
2129150	Benedetto_Allotta,Lorenzo_Becciolini,Riccardo_Costanzi,Francesca_Giardi,Alessandro_Ridolfi,Gregorio_Vettori	2012	Design and implementation of dynamic simulators for the testing of inertial sensors.	db/conf/icra/icra2012.html#AllottaBCGRV12
2129156	Sertac_Karaman,Matthew_R._Walter,Alejandro_Perez,Emilio_Frazzoli,Seth_J._Teller	2011	Anytime Motion Planning using the RRT.	db/conf/icra/icra2011.html#KaramanWPFT11
2129166	Hui_Wang,Michael_Jenkin,Patrick_W._Dymond	2011	The relative power of immovable markers in topological mapping.	db/conf/icra/icra2011.html#WangJD11
2129167	Thijs_Jeffry_de_Haas,Tim_Laue,fer	2012	A scripting-based approach to robot behavior engineering using hierarchical generators.	db/conf/icra/icra2012.html#HaasLR12
2129168	Yuanqiang_Dong,Daniel_Conrad,Guilherme_N._DeSouza	2011	"Wii Using Only 'We'": Using background subtraction and human pose recognition to eliminate game controllers.	db/conf/icra/icra2011.html#DongCD11
2129169	Chao_Liu_0003,Philippe_Poignet	2010	SP-ID regulation of rigid-link electrically-driven robots with uncertain kinematics.	db/conf/icra/icra2010.html#LiuP10
2129176	Ryo_Takei,Haomiao_Huang,Jerry_Ding,Claire_J._Tomlin	2012	Time-optimal multi-stage motion planning with guaranteed collision avoidance via an open-loop game formulation.	db/conf/icra/icra2012.html#TakeiHDT12
2129178	Scott_Helmer,David_G._Lowe	2010	Using stereo for object recognition.	db/conf/icra/icra2010.html#HelmerL10
2129189	Takeshi_Aoki,Yuki_Murayama,Shigeo_Hirose	2011	Mechanical design of three-wheeled lunar rover; "Tri-Star IV".	db/conf/icra/icra2011.html#AokiMH11
2129196	Chris_A._C._Parker,Elizabeth_A._Croft	2012	Personalization of a Cooperative Carrying Robot Controller.	db/conf/icra/icra2012.html#ParkerC12
2129202	Vasumathi_Raman,Hadas_Kress-Gazit	2012	Automated feedback for unachievable high-level robot behaviors.	db/conf/icra/icra2012.html#RamanK12
2129204	Guoyong_Zhao,Chee_Leong_Teo,Dietmar_Werner_Hutmacher,Etienne_Burdet	2010	Automated microassembly of tissue engineering scaffold.	db/conf/icra/icra2010.html#ZhaoTHB10
2129208	Mingli_Han,Yanliang_Zhang,Meng_Ying_Yu,Cheng_Yap_Shee,Wei_Tech_Ang	2011	Real-time modeling and control of the circular cell membranes strain.	db/conf/icra/icra2011.html#HanZYSA11
2129227	Oriol_Bohigas,Dimiter_Zlatanov,s_Ros,Montserrat_Manubens,Josep_M._Porta	2012	Numerical computation of manipulator singularities.	db/conf/icra/icra2012.html#BohigasZRMP12
2129228	Alexander_S._Boxerbaum,Andrew_D._Horchler,Kendrick_M._Shaw,Hillel_J._Chiel,Roger_D._Quinn	2012	Worms, waves and robots.	db/conf/icra/icra2012.html#BoxerbaumHSCQ12
2129235	Stephanie_Gil,Mac_Schwager,Brian_J._Julian,Daniela_Rus	2010	Optimizing communication in air-ground robot networks using decentralized control.	db/conf/icra/icra2010.html#GilSJR10
2129277	Zachary_A._Pezzementi,Caitlin_Reyda,Gregory_D._Hager	2011	Object mapping, recognition, and localization from tactile geometry.	db/conf/icra/icra2011.html#PezzementiRH11
2129286	Liping_Zheng,Yi-King_Choi,Xiaoping_Liu,Wenping_Wang	2011	CVT-based 2D motion planning with maximal clearance.	db/conf/icra/icra2011.html#ZhengCLW11
2129310	Junzhi_Yu,Ming_Wang,Zongshuai_Su,Min_Tan,Jianwei_Zhang_0001	2011	Dynamic modeling and its application for a CPG-coupled robotic fish.	db/conf/icra/icra2011.html#YuWSTZ11
2129312	Kuo-Chen_Huang,Shih-Huan_Tseng,Wei-Hao_Mou,Li-Chen_Fu	2012	Simultaneous localization and scene reconstruction with monocular camera.	db/conf/icra/icra2012.html#HuangTMF12
2129321	Matthew_J._Powell,Huihua_Zhao,Aaron_D._Ames	2012	Motion primitives for human-inspired bipedal robotic locomotion: walking and stair climbing.	db/conf/icra/icra2012.html#PowellZA12
2129323	Stephen_S._Nestinger,Michael_A._Demetriou	2012	Adaptive collaborative estimation of multi-agent mobile robotic systems.	db/conf/icra/icra2012.html#NestingerD12
2129327	Oliver_Kroemer,Jan_Peters_0001	2011	A flexible hybrid framework for modeling complex manipulation tasks.	db/conf/icra/icra2011.html#KroemerP11
2129341	Kyuhwa_Lee,Tae-Kyun_Kim,Yiannis_Demiris	2012	Learning reusable task components using hierarchical activity grammars with uncertainties.	db/conf/icra/icra2012.html#LeeKD12
2129347	Arren_J._Glover,William_P._Maddern,Michael_Warren,Stephanie_Reid,Michael_Milford,Gordon_Wyeth	2012	OpenFABMAP: An open source toolbox for appearance-based loop closure detection.	db/conf/icra/icra2012.html#GloverMWRMW12
2129348	Benjamin_Matthias_Peter,Roman_Ratnaweera,Wolfgang_Fischer,dric_Pradalier,Roland_Siegwart	2010	Design and evaluation of a fin-based underwater propulsion system.	db/conf/icra/icra2010.html#PeterRFPS10
2129350	Maxime_Gautier,bastien_Briot	2012	Global identification of drive gains parameters of robots using a known payload.	db/conf/icra/icra2012.html#GautierB12
2129353	Paul_J._White,Michael_L._Posner,Mark_Yim	2010	Strength analysis of miniature folded right angle tetrahedron chain Programmable Matter.	db/conf/icra/icra2010.html#WhitePY10
2129354	Van_Anh_Ho,Dzung_Viet_Dao,Susumu_Sugiyama,Shinichi_Hirai	2010	Design of a small-scale tactile sensor with three sensing points for using in robotic fingertips.	db/conf/icra/icra2010.html#HoDSH10
2129356	Jeremy_Ma,Sara_Susca,Max_Bajracharya,Larry_H._Matthies,Matthew_Malchano,David_Wooden	2012	Robust multi-sensor, day/night 6-DOF pose estimation for a dynamic legged vehicle in GPS-denied environments.	db/conf/icra/icra2012.html#MaSBMMW12
2129359	Joshua_Vander_Hook,Pratap_Tokekar,Volkan_Isler	2012	Cautious greedy strategy for bearing-based active localization: Experiments and theoretical analysis.	db/conf/icra/icra2012.html#HookTI12
2129362	Jorge_Rios-Martinez,Alessandro_Renzaglia,Anne_Spalanzani,Agostino_Martinelli,Christian_Laugier	2012	Navigating between people: A stochastic optimization approach.	db/conf/icra/icra2012.html#Rios-MartinezRSML12
2129363	Zhibin_Li,Nikolaos_G._Tsagarakis,Darwin_G._Caldwell	2012	Walking trajectory generation for humanoid robots with compliant joints: Experimentation with COMAN humanoid.	db/conf/icra/icra2012.html#LiTC12
2129365	Hitoshi_Arisumi,Nosan_Kwak,Kazuhito_Yokoi	2011	Systematic touch scheme for a humanoid robot to grasp a door knob.	db/conf/icra/icra2011.html#ArisumiKY11
2129366	Ryan_N._Smith,Arvind_Pereira,Yi_Chao,Peggy_Li,David_A._Caron,Burton_H._Jones,Gaurav_S._Sukhatme	2010	Autonomous Underwater Vehicle trajectory design coupled with predictive ocean models: A case study.	db/conf/icra/icra2010.html#SmithPCLCJS10
2129368	Eric_Joe_Coyle,Emmanuel_G._Collins_Jr.,Liang_Lu	2010	Updating control modes based on terrain classification.	db/conf/icra/icra2010.html#CoyleCL10
2129386	Pongsakorn_Polchankajorn,Thavida_Maneewarn	2011	Development of a helical climbing modular snake robot.	db/conf/icra/icra2011.html#PolchankajornM11
2129388	Yasamin_Mostofi,Mehrzad_Malmirchegini,Alireza_Ghaffarkhah	2010	Estimation of communication signal strength in robotic networks.	db/conf/icra/icra2010.html#MostofiMG10
2129393	Jilin_Liu,Zhangqian_Tong,Jinyuan_Fu,Donghai_Wang,Qi_Su,Jun_Zou	2011	A gecko inspired fluid driven climbing robot.	db/conf/icra/icra2011.html#LiuTFWSZ11
2129401	Akihiko_Murai,Katsu_Yamane	2011	A neuromuscular locomotion controller that realizes human-like responses to unexpected disturbances.	db/conf/icra/icra2011.html#MuraiY11
2129402	Ren_C._Luo,Chih_C._Chang	2011	Electromyographic evaluation of therapeutic massage effect using multi-finger robot hand.	db/conf/icra/icra2011.html#LuoC11
2129411	Prasad_Hemakumara,Salah_Sukkarieh	2011	Non-parametric UAV system identification with dependent Gaussian processes.	db/conf/icra/icra2011.html#HemakumaraS11
2129413	Yumi_Iwashita,Ryo_Kurazume,Takamitsu_Mori,Masaki_Saito,Tsutomu_Hasegawa	2010	Model-based motion tracking system using distributed network cameras.	db/conf/icra/icra2010.html#IwashitaKMSH10
2129415	Sovannara_Hak,Nicolas_Mansard,Oscar_E._Ramos,Layale_Saab,Olivier_Stasse	2012	Capture, recognition and imitation of anthropomorphic motion.	db/conf/icra/icra2012.html#HakMRSS12
2129417	Ioana_Corina_Bogdan,Gabriel_Abba	2012	Identification of mechanical parameters at low velocities for a micropositioning stage using a velocity hysteresis model.	db/conf/icra/icra2012.html#BogdanA12
2129446	Amaury_Dame,ric_Marchand	2011	A new information theoretic approach for appearance-based navigation of non-holonomic vehicle.	db/conf/icra/icra2011.html#DameM11
2129448	Jeremy_H._Gillula,Claire_J._Tomlin	2012	Guaranteed Safe Online Learning via Reachability: tracking a ground target using a quadrotor.	db/conf/icra/icra2012.html#GillulaT12
2129451	Robert_Shade,Paul_Newman_0001	2010	Discovering and mapping complete surfaces with stereo.	db/conf/icra/icra2010.html#ShadeN10
2129452	Myung_Hwangbo,Takeo_Kanade	2011	Visual-inertial UAV attitude estimation using urban scene regularities.	db/conf/icra/icra2011.html#HwangboK11
2129470	Huifang_Wang,Lucia_Pallottino,Antonio_Bicchi	2010	Controllability for pairs of vehicles maintaining constant distance.	db/conf/icra/icra2010.html#WangPB10
2129477	Alex_Simpkins,Michael_S._Kelley,Emanuel_Todorov	2011	Modular bio-mimetic robots that can interact with the world the way we do.	db/conf/icra/icra2011.html#SimpkinsKT11
2129484	Benjamin_Balaguer,Stefano_Carpin	2010	Efficient grasping of novel objects through dimensionality reduction.	db/conf/icra/icra2010.html#BalaguerC10
2129500	Ganesh_Gowrishankar,Ã©,Sami_Haddadin,ffer,Etienne_Burdet	2012	A versatile biomimetic controller for contact tooling and haptic exploration.	db/conf/icra/icra2012.html#GowrishankarJHAB12
2129516	Adam_Bry,Nicholas_Roy	2011	Rapidly-exploring Random Belief Trees for motion planning under uncertainty.	db/conf/icra/icra2011.html#BryR11
2129517	Matthew_J._Bays,Apoorva_Shende,Daniel_J._Stilwell,Signe_A._Redfield	2011	A solution to the multiple aspect coverage problem.	db/conf/icra/icra2011.html#BaysSSR11
2129531	Hyuk_Kang,Frank_C._Park	2012	Humanoid motion optimization via nonlinear dimension reduction.	db/conf/icra/icra2012.html#KangP12
2129532	Li_Wen,Tianmiao_Wang,Guanhao_Wu,Jinlan_Li	2011	A novel method based on a force-feedback technique for the hydrodynamic investigation of kinematic effects on robotic fish.	db/conf/icra/icra2011.html#WenWWL11
2129539	Jeremy_H._Gillula,Haomiao_Huang,Michael_P._Vitus,Claire_J._Tomlin	2010	Design of guaranteed safe maneuvers using reachable sets: Autonomous quadrotor aerobatics in theory and practice.	db/conf/icra/icra2010.html#GillulaHVT10
2129549	Yasuhisa_Hirata,Keitaro_Suzuki,Kazuhiro_Kosuge	2011	Improvement in the performance of passive motion support system with wires based on analysis of brake control.	db/conf/icra/icra2011.html#HirataSK11
[truncated: 10,234 more rows]
