# Supplementary material for: A serendipity-biased Deepwalk for collaborators recommendation
Source: PeerJ Comput Sci. 2019 Mar 4;5:e178. doi: 10.7717/peerj-cs.178 (PMC7924530; doi:10.7717/peerj-cs.178)
Supplement: Data S3 [file peerj-cs-05-178-s003.csv]

1982373	Prashanth_G._Reddy,Nigamanth_Sridhar	2010	Lakon: a middle-ground approach to high-frequency data acquisition and in-network processing in sensor networks.	db/conf/ipsn/ipsn2010.html#ReddyS10
1982383	Md._Yusuf_Sarwar_Uddin,Md._Tanvir_Al_Amin,Tarek_F._Abdelzaher,Arun_Iyengar,Ramesh_Govindan	2012	PhotoNet+: outlier-resilient coverage maximization in visual sensing applications.	db/conf/ipsn/ipsn2012.html#UddinAAIG12
1982385	Jessica_Croft,Neal_Patwari,Sneha_Kumar_Kasera	2010	Robust uncorrelated bit extraction methodologies for wireless sensors.	db/conf/ipsn/ipsn2010.html#CroftPK10
1982394	Carlo_Fischione,nsson	2011	Fast-Lipschitz optimization with wireless sensor networks applications.	db/conf/ipsn/ipsn2011.html#FischioneJ11
1982401	Dezhi_Hong,Ben_Zhang,Qiang_Li,S._M._Shahriar_Nirjon,Robert_F._Dickerson,Guobin_Shen,Xiaofan_Jiang,John_A._Stankovic	2012	SEPTIMU: continuous in-situ human wellness monitoring and feedback using sensors embedded in earphones.	db/conf/ipsn/ipsn2012.html#HongZLNDSJS12
1982405	Andrew_Markham,Niki_Trigoni	2012	Magneto-inductive networked rescue system (MINERS): taking sensor networks underground.	db/conf/ipsn/ipsn2012.html#MarkhamT12
1982421	Brandon_Rumberg,David_W._Graham,Vinod_Kulathumani	2010	Hibernets: energy-efficient sensor networks using analog signal processing.	db/conf/ipsn/ipsn2010.html#RumbergGK10a
1982423	Yi-Hsuan_Tu,Yen-Chiu_Lee,Yi-Wei_Tsai,Pai_H._Chou,Ting-Chou_Chien	2011	EcoCast: Interactive, object-oriented macroprogramming for networks of ultra-compact wireless sensor nodes.	db/conf/ipsn/ipsn2011.html#TuLTCC11
1982426	Georg_Oberholzer,Philipp_Sommer,Roger_Wattenhofer	2011	SpiderBat: Augmenting wireless sensor networks with distance and angle information.	db/conf/ipsn/ipsn2011.html#OberholzerSW11
1982433	Kazuhisa_Asakawa,Mitsuhiro_Kashiwada,Norihisa_Segawa,Jun_Sawamoto	2011	A prototype of sensor network visualization application with geographic information.	db/conf/ipsn/ipsn2011.html#AsakawaKSS11
1982437	Zhihao_Jiang,Miroslav_Pajic,Rahul_Mangharam	2011	Demo abstract: Closed-loop testing for implantable cardiac pacemakers.	db/conf/ipsn/ipsn2011.html#JiangPM11
1982439	Madhur_Behl,Mansimar_Aneja,Harsh_Jain,Rahul_Mangharam	2011	EnRoute: An energy router for energy-efficient buildings.	db/conf/ipsn/ipsn2011.html#BehlAJM11
1982441	Yi_Wang,Bhaskar_Krishnamachari,Qing_Zhao,Murali_Annavaram	2010	Markov-optimal sensing policy for user state estimation in mobile devices.	db/conf/ipsn/ipsn2010.html#WangKZA10
1982451	Prasant_Misra,Sanjay_Jha,Diethelm_Ostry	2010	Long-range detection in acoustic sensor networks.	db/conf/ipsn/ipsn2010.html#MisraJO10
1982453	Bernhard_Buchli,Mustafa_Yuecel,Roman_Lim,Tonio_Gsell,Jan_Beutel	2011	Demo abstract: Feature-rich platform for WSN design space exploration.	db/conf/ipsn/ipsn2011.html#BuchliYLGB11
1982466	sterlind,Luca_Mottola,Thiemo_Voigt,Nicolas_Tsiftes,Adam_Dunkels	2012	Strawman: resolving collisions in bursty low-power wireless networks.	db/conf/ipsn/ipsn2012.html#OsterlindMVTD12
1982480	Hassan_Ghasemzadeh,Vitali_Loseu,Roozbeh_Jafari	2010	Collaborative signal processing for action recognition in body sensor networks: a distributed classification algorithm using motion transcripts.	db/conf/ipsn/ipsn2010.html#GhasemzadehLJ10
1982481	Daniel_Golovin,Matthew_Faulkner,Andreas_Krause_0001	2010	Online distributed sensor selection.	db/conf/ipsn/ipsn2010.html#GolovinFK10
1982492	Federico_Ferrari,Marco_Zimmerling,Lothar_Thiele,Olga_Saukh	2011	Efficient network flooding and time synchronization with Glossy.	db/conf/ipsn/ipsn2011.html#FerrariZTS11
1982493	Marco_Zimmerling,Federico_Ferrari,Matthias_Woehrle,Lothar_Thiele	2010	Exploiting protocol models for generating feasible communication stack configurations.	db/conf/ipsn/ipsn2010.html#ZimmerlingFWT10
1982499	nio_Gonga,Olaf_Landsiedel,Pablo_Soldati,Mikael_Johansson	2012	Multi-channel communication vs. adaptive routing for reliable communication in WSNs.	db/conf/ipsn/ipsn2012.html#GongaLSJ12
1982500	Arsalan_Tavakoli,Aman_Kansal,Suman_Nath	2010	On-line sensing task optimization for shared sensors.	db/conf/ipsn/ipsn2010.html#TavakoliKN10
1982502	Octav_Chipara,Gregory_Hackmann,Chenyang_Lu,William_D._Smart,Gruia-Catalin_Roman	2010	Practical modeling and prediction of radio coverage of indoor sensor networks.	db/conf/ipsn/ipsn2010.html#ChiparaHLSR10
1982507	Frank_Mokaya,Cynthia_Kuo,Pei_Zhang	2012	MARS: a muscle activity recognition system using inertial sensors.	db/conf/ipsn/ipsn2012.html#MokayaKZ12
1982520	William_P._Bennett,Megan_Fitzpatrick,David_J._Anthony,Mehmet_C._Vuran,Anne_Lacy	2012	Crane charades: behavior identification via backpack mounted sensor platforms.	db/conf/ipsn/ipsn2012.html#BennettFAVL12
1982522	Muhammad_Hamad_Alizai,Tobias_Vaegs,Olaf_Landsiedel,tz,gila_Bitsch_Link,Klaus_Wehrle	2011	Probabilistic addressing: Stable addresses in unstable wireless networks.	db/conf/ipsn/ipsn2011.html#AlizaiVLGLW11
1982524	Yiqing_Cai,Robert_Ghrist	2012	Cyclic network automata for indoor sensor network.	db/conf/ipsn/ipsn2012.html#CaiG12
1982532	Yuvraj_Agarwal,Bharathan_Balaji,Seemanta_Dutta,Rajesh_K._Gupta,Thomas_Weng	2011	Duty-cycling buildings aggressively: The next frontier in HVAC control.	db/conf/ipsn/ipsn2011.html#AgarwalBDGW11
1982537	Annie_H._Liu,Julian_J._Bunn,K._Mani_Chandy	2011	Sensor networks for the detection and tracking of radiation and other threats in cities.	db/conf/ipsn/ipsn2011.html#LiuBC11
1982539	Yi-Hsuan_Tu,Yen-Chiu_Li,Ting-Chou_Chien,Pai_H._Chou	2011	EcoCast: Interactive, object-oriented macroprogramming for networks of ultra-compact wireless sensor nodes.	db/conf/ipsn/ipsn2011.html#TuLCC11
1982544	Pan_Gun_Park,Carlo_Fischione,Karl_Henrik_Johansson	2010	Adaptive IEEE 802.15.4 protocol for energy efficient, reliable and timely communications.	db/conf/ipsn/ipsn2010.html#ParkFJ10
1982547	Lohit_Yerva,Bradford_Campbell,Apoorva_Bansal,Thomas_Schmid,Prabal_Dutta	2012	Grafting energy-harvesting leaves onto the sensornet tree.	db/conf/ipsn/ipsn2012.html#YervaCBSD12
1982550	Carlo_Alberto_Boano,Thiemo_Voigt,Claro_Noda,mer,Marco_Zuniga	2011	JamLab: Augmenting sensornet testbeds with realistic and controlled interference generation.	db/conf/ipsn/ipsn2011.html#BoanoVNRZ11
1982557	Ruirui_Jiang,Xiaomeng_Ban,Mayank_Goswami,Wei_Zeng,Jie_Gao,Xianfeng_Gu	2011	Exploration of path space using sensor network geometry.	db/conf/ipsn/ipsn2011.html#JiangBGZGG11
1982558	Chenguang_Shen,Henry_Herman,Zainul_Charbiwala,Mani_B._Srivastava	2012	MiDebug: microcontroller integrated development and debugging environment.	db/conf/ipsn/ipsn2012.html#ShenHCS12
1982563	Andrew_Krioukov,David_E._Culler	2012	Personal building controls.	db/conf/ipsn/ipsn2012.html#KrioukovC12
1982566	Yin_Wang,Gaofeng_Pan,Zhiyu_Huang	2012	Direct multi-hop time synchronization with constructive interference.	db/conf/ipsn/ipsn2012.html#WangPH12
1982567	Muhammad_Hamad_Alizai,Tobias_Vaegs,Olaf_Landsiedel,Raimondas_Sasnauskas,Klaus_Wehrle	2010	Statistical vector based point-to-point routing in wireless networks.	db/conf/ipsn/ipsn2010.html#AlizaiVLSW10
1982568	ndez-Prieto,ada_Bago,nez,Manuel_A._Gadeo_Martos,Juan_R._Velasco	2010	Architecture for redundant knowledge reduction in embedded fuzzy rule-based systems into wireless sensor network nodes.	db/conf/ipsn/ipsn2010.html#Fernandez-PrietoBCMV10
1982573	Morten_Tranberg_Hansen	2011	Multi-purpose passive debugging for embedded wireless.	db/conf/ipsn/ipsn2011.html#Hansen11
1982574	Charalambos_Sergiou,Vasos_Vassiliou	2010	Alternative path creation vs data rate reduction for congestion mitigation in wireless sensor networks.	db/conf/ipsn/ipsn2010.html#SergiouV10
1982579	Marco_Zimmerling,Federico_Ferrari,Luca_Mottola,Thiemo_Voigt,Lothar_Thiele	2012	pTunes: runtime parameter adaptation for low-power MAC protocols.	db/conf/ipsn/ipsn2012.html#ZimmerlingFMVT12
1982591	Matteo_Ceriotti,Ã ,Leandro_D'Orazio,Roberto_Doriguzzi,Daniele_Facchin,Stefan_Guna,Gian_Paolo_Jesi,Renato_Lo_Cigno,Luca_Mottola,Amy_L._Murphy,Massimo_Pescalli,Gian_Pietro_Picco,Denis_Pregnolato,Carloalberto_Torghele	2011	Is there light at the ends of the tunnel? Wireless sensor networks for adaptive lighting in road tunnels.	db/conf/ipsn/ipsn2011.html#CeriottiCDDFGJCMMPPPT11
1982594	Varick_L._Erickson,n,Alberto_Cerpa	2011	OBSERVE: Occupancy-based system for efficient reduction of HVAC energy.	db/conf/ipsn/ipsn2011.html#EricksonCC11
1982599	Yong_Yang,Lu_Su,Mohammad_Maifi_Hasan_Khan,Michael_LeMay,Tarek_F._Abdelzaher,Jiawei_Han	2011	Power watermarking: Facilitating power-based diagnosis of node silence in remote high-end sensing systems.	db/conf/ipsn/ipsn2011.html#YangSKLAH11
1982601	Henry_E._Baidoo-Williams,Jeremy_S._Bril,Mehmed_B._Diken,Jonathan_Durst,Josiah_McClurg,Soura_Dasgupta,Craig_L._Just,Anton_Kruger,Raghuraman_Mudumbai,Teresa_Newton	2012	Cybermussels: a biological sensor network using freshwater mussels.	db/conf/ipsn/ipsn2012.html#Baidoo-WilliamsBDDMDJKMN12
1982609	Fang-Jing_Wu,Chen-Shao_Huang,Yu-Chee_Tseng	2010	My Tai-Chi book: a virtual-physical social network platform.	db/conf/ipsn/ipsn2010.html#WuHT10
1982610	nio_Gonga,Mikael_Johansson,Adam_Dunkels	2010	None	db/conf/ipsn/ipsn2010.html#GongaJD10
1982621	Anwar_Al-Khateeb,Luciano_Lavagno	2010	Energy optimization framework for WSN design.	db/conf/ipsn/ipsn2010.html#AnwarL10
1982631	Wendong_Xiao,Peidong_Liu,Wee-Seng_Soh,Yunye_Jin	2012	Extreme learning machine for wireless indoor localization.	db/conf/ipsn/ipsn2012.html#XiaoLSJ12
1982632	Jorge_Ortiz,David_E._Culler	2010	Multichannel reliability assessment in real world WSNs.	db/conf/ipsn/ipsn2010.html#OrtizC10
1982633	Wei_Meng,Lihua_Xie,Wendong_Xiao	2012	TDOA sensor pairing in multi-hop sensor networks.	db/conf/ipsn/ipsn2012.html#MengXX12
1982637	Athanasios_Bamis,Jia_Fang,Andreas_Savvides	2010	Discovering routine events in sensor streams for macroscopic sensing composition.	db/conf/ipsn/ipsn2010.html#BamisFS10
1982645	m,Luca_Mottola,Martin_Nilsson,Thiemo_Voigt	2010	Smart antennas made practical: the SPIDA way.	db/conf/ipsn/ipsn2010.html#OstromMNV10
1982646	Matthew_Faulkner,Michael_Olson,Rishi_Chandy,Jonathan_Krause,K._Mani_Chandy,Andreas_Krause_0001	2011	Demo abstract, the next big one: Detecting earthquakes and other rare events from community-based sensors.	db/conf/ipsn/ipsn2011.html#FaulknerOCKCK11a
1982652	Yafeng_Wu,Krasimira_Kapitanova,Jingyuan_Li,John_A._Stankovic,Sang_Hyuk_Son,Kamin_Whitehouse	2010	Run time assurance of application-level requirements in wireless sensor networks.	db/conf/ipsn/ipsn2010.html#WuKLSSW10
1982653	Lanny_Sitanayah,Cormac_J._Sreenan,Kenneth_N._Brown	2010	Emergency response MAC protocol (ER-MAC) for wireless sensor networks.	db/conf/ipsn/ipsn2010.html#SitanayahSB10
1982659	Aveek_Purohit,Frank_Mokaya,Pei_Zhang	2012	Collaborative indoor sensing with the sensorfly aerial sensor network.	db/conf/ipsn/ipsn2012.html#PurohitMZ12
1982661	Charalambos_Sergiou,Marios_Koutroullos,Vasos_Vassiliou	2011	Poster abstract: A congestion mitigation approach using mobile nodes in Wireless Sensor Networks.	db/conf/ipsn/ipsn2011.html#SergiouKV11
1982667	Alexander_D._Young,Martin_J._Ling,D._K._Arvind	2011	IMUSim: A simulation environment for inertial sensing algorithm design and evaluation.	db/conf/ipsn/ipsn2011.html#YoungLA11
1982671	Yang_Zhao,Neal_Patwari	2012	Histogram distance-based radio tomographic localization.	db/conf/ipsn/ipsn2012.html#ZhaoP12
1982673	Dan_Feldman,Andrew_Sugaya,Daniela_Rus	2012	An effective coreset compression algorithm for large scale sensor networks.	db/conf/ipsn/ipsn2012.html#FeldmanSR12
1982674	Utsav_Drolia,Zhenyan_Wang,Srinivas_Vemuri,Madhur_Behl,Rahul_Mangharam	2011	Demo abstract: AutoPlug - An automotive test-bed for ECU testing, validation and verification.	db/conf/ipsn/ipsn2011.html#DroliaWVBM11
1982675	Yukang_Guo,Mike_Hazas	2011	Localising speech, footsteps and other sounds using resource-constrained devices.	db/conf/ipsn/ipsn2011.html#GuoH11
1982679	Yin_Chen,Qiang_Wang,Marcus_Chang,Andreas_Terzis	2011	Ultra-low power time synchronization using passive radio receivers.	db/conf/ipsn/ipsn2011.html#ChenWCT11
1982686	Igor_Talzi,Christian_F._Tschudin	2010	Using meta-code for building task-specific WSNs.	db/conf/ipsn/ipsn2010.html#TalziT10
1982688	Biruk_Silase_Geletu,Luca_Mottola,Thiemo_Voigt,sterlind	2011	Modeling an electronically switchable directional antenna for low-power wireless networks.	db/conf/ipsn/ipsn2011.html#GeletuMVO11
1982695	Anthony_Schoofs,Antonio_G._Ruzzelli,Gregory_M._P._O'Hare	2010	Appliance activity monitoring using wireless sensors.	db/conf/ipsn/ipsn2010.html#SchoofsRO10
1982697	Yiran_Shen,Wen_Hu,Mingrui_Yang,Junbin_Liu,Chun_Tung_Chou	2012	Efficient background subtraction for tracking in embedded camera networks.	db/conf/ipsn/ipsn2012.html#ShenHYLC12
1982698	Federico_Ferrari,Marco_Zimmerling,Lothar_Thiele,Luca_Mottola	2012	The low-power wireless bus: simplicity is (again) the soul of efficiency.	db/conf/ipsn/ipsn2012.html#FerrariZTM12
1982700	Morten_Tranberg_Hansen,Branislav_Kusy	2011	Cross-platform wireless sensor network development.	db/conf/ipsn/ipsn2011.html#HansenK11
1982707	Johannes_Schneider,Roger_Wattenhofer	2011	Poster abstract: Message position modulation for power saving and increased bandwidth in sensor networks.	db/conf/ipsn/ipsn2011.html#SchneiderW11a
1982711	Corinna_Schmitt,Lothar_Braun,Thomas_Kothmayr,Georg_Carle	2010	Collecting sensor data using compressed IPFIX.	db/conf/ipsn/ipsn2010.html#SchmittBKC10
1982716	Aveek_Purohit,Bodhi_Priyantha,Jie_Liu	2011	WiFlock: Collaborative group discovery and maintenance in mobile sensor networks.	db/conf/ipsn/ipsn2011.html#PurohitPL11
1982720	Xi_Chen,Andrea_Edelstein,Yunpeng_Li,Mark_Coates,Michael_G._Rabbat,Aidong_Men	2011	Sequential Monte Carlo for simultaneous passive device-free tracking and sensor localization using received signal strength measurements.	db/conf/ipsn/ipsn2011.html#ChenELCRM11
1982725	HyungJune_Lee,Martin_Wicke,Branislav_Kusy,Omprakash_Gnawali,Leonidas_J._Guibas	2010	Data stashing: energy-efficient information delivery to mobile sinks through trajectory prediction.	db/conf/ipsn/ipsn2010.html#LeeWKGG10
1982730	Arvind_Kandhalu,Karthik_Lakshmanan,Ragunathan_Rajkumar	2010	U-connect: a low-latency energy-efficient asynchronous neighbor discovery protocol.	db/conf/ipsn/ipsn2010.html#KandhaluLR10
1982740	Bryan_Kate,Jason_Waterman,Karthik_Dantu,Matt_Welsh	2012	Simbeeotic: a simulator and testbed for micro-aerial vehicle swarm experiments.	db/conf/ipsn/ipsn2012.html#KateWDW12
1982741	Richard_Huber,Philipp_Sommer,Roger_Wattenhofer	2011	Demo abstract: Debugging wireless sensor network simulations with YETI and COOJA.	db/conf/ipsn/ipsn2011.html#HuberSW11
1982743	Yi-Lung_Tsai,Ting-Ting_Tu,Pai_H._Chou	2011	EcoIMU: A compact, wireless, gyro-free inertial measurement unit based on two triaxial accelerometers.	db/conf/ipsn/ipsn2011.html#TsaiTC11
1982745	Xiaofan_Jiang,Chieh-Jan_Mike_Liang,Kaifei_Chen,Ben_Zhang,Jeff_Hsu,Jie_Liu,Bin_Cao,Feng_Zhao	2012	Design and evaluation of a wireless magnetic-based proximity detection platform for indoor applications.	db/conf/ipsn/ipsn2012.html#JiangLCZHLCZ12
1982757	Fulu_Li,James_Barabas,Ana_L._Santos	2010	Information processing for live photo mosaic with a group of wireless image sensors.	db/conf/ipsn/ipsn2010.html#LiBS10
1982774	Damien_O'Rourke,Junbin_Liu,Tim_Wark,Wen_Hu,Darren_Moore,Leslie_Overs,Raja_Jurdak	2010	Towards a framework for a versatile wireless multimedia sensor network platform.	db/conf/ipsn/ipsn2010.html#ORourkeLWHMOJ10
1982776	Branislav_Kusy,Christian_Richter,Wen_Hu,Mikhail_Afanasyev,Raja_Jurdak,nig,David_Abbott,Cong_Huynh,Diethelm_Ostry	2011	Radio diversity for reliable communication in WSNs.	db/conf/ipsn/ipsn2011.html#KusyRHAJBAHO11
1982797	Chieh-Jan_Mike_Liang,Kaifei_Chen,Jie_Liu,Nissanka_Bodhi_Priyantha,Feng_Zhao	2012	Shipping data from heterogeneous protocols on packet train.	db/conf/ipsn/ipsn2012.html#LiangCLPZ12
1982800	Md._Mahbubur_Rahman,Amin_Ahsan_Ali,Andrew_Raij,Mustafa_al'Absi,Emre_Ertin,Santosh_Kumar	2011	Demo abstract: Online detection of speaking from respiratory measurements collected in the natural environment.	db/conf/ipsn/ipsn2011.html#RahmanARaEK11
1982813	Brandon_Rumberg,David_W._Graham,Vinod_Kulathumani	2010	Hibernets: energy-efficient sensor networks using analog signal processing.	db/conf/ipsn/ipsn2010.html#RumbergGK10
1982814	Morten_Tranberg_Hansen,Raja_Jurdak,Branislav_Kusy	2011	Unified broadcast in sensor networks.	db/conf/ipsn/ipsn2011.html#HansenJK11
1982815	Ehsan_Ullah_Warriach,Kenji_Tei,Tuan_Anh_Nguyen,Marco_Aiello_0001	2012	Fault detection in wireless sensor networks: a hybrid approach.	db/conf/ipsn/ipsn2012.html#WarriachTNA12
1982819	Miroslav_Pajic,Shreyas_Sundaram,Mansimar_Aneja,Srinivas_Vemuri,Rahul_Mangharam,George_J._Pappas	2011	Architecture for a fully distributed Wireless Control Network.	db/conf/ipsn/ipsn2011.html#PajicSAVMP11
1982827	Shuai_Huang,Shuyan_Sun,Zhipei_Huang,Jiankang_Wu,Xiaoli_Meng,Guanhong_Tao,Nan_Zhang,Li_Yang	2012	Ambulatory real-time micro-sensor motion capture.	db/conf/ipsn/ipsn2012.html#HuangSHWMTZY12
1982833	Raimondas_Sasnauskas,Olaf_Landsiedel,Muhammad_Hamad_Alizai,Carsten_Weise,Stefan_Kowalewski,Klaus_Wehrle	2010	KleeNet: discovering insidious interaction bugs in wireless sensor networks before deployment.	db/conf/ipsn/ipsn2010.html#SasnauskasLAWKW10
1982845	Matthew_Faulkner,Michael_Olson,Rishi_Chandy,Jonathan_Krause,K._Mani_Chandy,Andreas_Krause_0001	2011	The next big one: Detecting earthquakes and other rare events from community-based sensors.	db/conf/ipsn/ipsn2011.html#FaulknerOCKCK11
1982846	Nicolas_Tsiftes,Joakim_Eriksson,Adam_Dunkels	2010	Low-power wireless IPv6 routing with ContikiRPL.	db/conf/ipsn/ipsn2010.html#TsiftesED10
1982861	Prasant_Misra,Wen_Hu,Mingrui_Yang,Sanjay_Jha	2012	Efficient cross-correlation via sparse representation in sensor networks.	db/conf/ipsn/ipsn2012.html#MisraHYJ12
1982862	Xiaofan_Jiang,Stephen_Dawson-Haggerty,David_E._Culler	2010	sMAP: simple monitoring and actuation profile.	db/conf/ipsn/ipsn2010.html#JiangDC10
1982863	Matthias_Keller,Lothar_Thiele,Jan_Beutel	2011	Reconstruction of the correct temporal order of sensor network data.	db/conf/ipsn/ipsn2011.html#KellerTB11
1982868	Stephen_Dawson-Haggerty,Steven_Lanzisera,Jay_Taneja,Richard_Brown,David_E._Culler	2012	@scale: insights from a large, long-lived appliance energy WSN.	db/conf/ipsn/ipsn2012.html#Dawson-HaggertyLTBC12
1982870	Paul_D._Martin_0001,William_Etter,Rahul_Mangharam	2011	Demo abstract: R.A.V.E.N. - Remote autonomous vehicle explorer network.	db/conf/ipsn/ipsn2011.html#MartinEM11
1982873	Ted_Tsung-Te_Lai,Wei-Ju_Chen,Kuei-Han_Li,Polly_Huang,Hao-Hua_Chu	2012	TriopusNet: automating wireless sensor network deployment and replacement in pipeline monitoring.	db/conf/ipsn/ipsn2012.html#LaiCLHC12
1982879	Amin_Ahsan_Ali,Syed_Monowar_Hossain,Karen_Hovsepian,Md._Mahbubur_Rahman,Kurt_Plarre,Santosh_Kumar	2012	mPuff: automated detection of cigarette smoking puffs from respiration measurements.	db/conf/ipsn/ipsn2012.html#AliHHRPK12
1982884	Krishna_Kant_Chintalapudi	2010	i-MAC - a MAC that learns.	db/conf/ipsn/ipsn2010.html#Chintalapudi10
1982886	Sirajum_Munir,Shan_Lin,Enamul_Hoque,S._M._Shahriar_Nirjon,John_A._Stankovic,Kamin_Whitehouse	2010	Addressing burstiness for reliable communication and latency bound generation in wireless sensor networks.	db/conf/ipsn/ipsn2010.html#MunirLHNSW10
1982901	Yi-Hsuan_Chiang,Matthias_Keller,Roman_Lim,Polly_Huang,Jan_Beutel	2012	Light-weight network health monitoring.	db/conf/ipsn/ipsn2012.html#ChiangKLHB12
1982909	Seshan_Srirangarajan,Mudasser_Iqbal,Michael_Allen,Ami_Preis,Cheng_Fu,Lewis_Girod,Kai-Juan_Wong,Hock-Beng_Lim,Andrew_Whittle	2010	Real-time burst event detection in water distribution systems.	db/conf/ipsn/ipsn2010.html#SrirangarajanIAPFGWLW10
1982912	Miroslav_Pajic,Shreyas_Sundaram,Jerome_Le_Ny,George_J._Pappas,Rahul_Mangharam	2012	Closing the loop: a simple distributed method for control over wireless networks.	db/conf/ipsn/ipsn2012.html#PajicSNPM12
1982917	Michal_Marks,Ewa_Niewiadomska-Szynkiewicz	2010	Localization based on stochastic optimization and RSSI measurements.	db/conf/ipsn/ipsn2010.html#MarksN10
1982920	Huang-Chen_Lee,Chun-Yu_Lin,Chuan-Yu_Cho,Chen-Lung_Chan,Yao-Min_Fang,Bing-Jean_Lee,Chung-Ta_King	2010	The design considerations of a sensor grid for monitoring precipitation in debris-flow-prone areas.	db/conf/ipsn/ipsn2010.html#LeeLCCFLK10
1982921	Huang-Bin_Huang,Huang-Chen_Lee	2012	Detecting faulty street lamps with illumination maps.	db/conf/ipsn/ipsn2012.html#HuangL12
1982922	Dogan_Yazar,Nicolas_Tsiftes,sterlind,Niclas_Finne,Joakim_Eriksson,Adam_Dunkels	2010	Augmenting reality with IP-based sensor networks.	db/conf/ipsn/ipsn2010.html#YazarTOFED10
1982923	Luca_Mottola	2010	Programming storage-centric sensor networks with Squirrel.	db/conf/ipsn/ipsn2010.html#Mottola10
1982925	Doina_Bucur,Marta_Z._Kwiatkowska	2010	Software verification for TinyOS.	db/conf/ipsn/ipsn2010.html#BucurK10
1982929	Kurt_Plarre,Andrew_Raij,Syed_Monowar_Hossain,Amin_Ahsan_Ali,Motohiro_Nakajima,Mustafa_al'Absi,Emre_Ertin,Thomas_Kamarck,Santosh_Kumar,Marcia_Scott,Daniel_P._Siewiorek,Asim_Smailagic,Lorentz_E._Wittmers	2011	Continuous inference of psychological stress from sensory measurements collected in the natural environment.	db/conf/ipsn/ipsn2011.html#PlarreRHANaEKKSSSW11
1982933	Dong_Wang,Lance_M._Kaplan,Hieu_Khac_Le,Tarek_F._Abdelzaher	2012	On truth discovery in social sensing: a maximum likelihood estimation approach.	db/conf/ipsn/ipsn2012.html#WangKLA12
1982941	Nadeem_Ahmed,Salil_S._Kanhere,Sanjay_Jha	2010	Experimental evaluation of multi-hop routing protocols for wireless sensor networks.	db/conf/ipsn/ipsn2010.html#AhmedKJ10
1982944	Roman_Garnett,Michael_A._Osborne,Stephen_J._Roberts	2010	Bayesian optimization for sensor set selection.	db/conf/ipsn/ipsn2010.html#GarnettOR10
1982946	Chun_Lo,Jerome_P._Lynch,Mingyan_Liu	2012	Pair-wise reference-free fault detection in wireless sensor networks.	db/conf/ipsn/ipsn2012.html#LoLL12
1982955	Alexander_D._Young,Martin_J._Ling,D._K._Arvind	2010	Distributed estimation of linear acceleration for improved accuracy in wireless inertial motion capture.	db/conf/ipsn/ipsn2010.html#YoungLA10
1982969	Philip_Valencia,Peter_Lindsay,Raja_Jurdak	2010	Distributed genetic evolution in WSN.	db/conf/ipsn/ipsn2010.html#ValenciaLJ10
1982970	Fulu_Li,James_Barabas,Ankit_Mohan,Ramesh_Raskar	2010	Image sensing under unfavorable photographic conditions with a group of wireless image sensors.	db/conf/ipsn/ipsn2010.html#LiBMR10
1982972	Peng_Li,John_Regehr	2010	T-check: bug finding for sensor networks.	db/conf/ipsn/ipsn2010.html#LiR10
1982974	Mudasser_Iqbal,Daiqin_Yang,Talha_Obaid,Teng_Jie_Ng,Hock-Beng_Lim	2011	Demo abstract: A service-oriented application programming interface for sensor network virtualization.	db/conf/ipsn/ipsn2011.html#IqbalYONL11
1982975	Pedro_A._Forero,Alfonso_Cano,Georgios_B._Giannakis	2010	Consensus-based distributed linear support vector machines.	db/conf/ipsn/ipsn2010.html#ForeroCG10
1982982	Hongzhao_Huang,Sam_Anzaroot,Heng_Ji,Hieu_Khac_Le,Dong_Wang,Tarek_F._Abdelzaher	2012	Free-form text summarization in social sensing.	db/conf/ipsn/ipsn2012.html#HuangAJLWA12
1982992	Lien-Wu_Chen,Kun-Ze_Syue,Yu-Chee_Tseng	2010	A vehicular surveillance and sensing system for car security and tracking applications.	db/conf/ipsn/ipsn2010.html#ChenST10
1982993	Krisztian_Veress,Miklos_Maroti	2011	LinkBench: Benchmark and metric framework for wireless sensor networks.	db/conf/ipsn/ipsn2011.html#VeressM11
1982995	Ravneet_Bajwa,Ram_Rajagopal,Pravin_Varaiya,Robert_Kavaler	2011	In-pavement wireless sensor network for vehicle classification.	db/conf/ipsn/ipsn2011.html#BajwaRVK11
1982999	Olaf_Landsiedel,Euhanna_Ghadimi,Simon_Duquennoy,Mikael_Johansson	2012	Low power, low delay: opportunistic routing meets duty cycling.	db/conf/ipsn/ipsn2012.html#LandsiedelGDJ12
1983000	David_J._Anthony,William_P._Bennett,Mehmet_C._Vuran,Matthew_B._Dwyer,Sebastian_G._Elbaum,Anne_Lacy,Mike_Engels,Walter_Wehtje	2012	Sensing through the continent: towards monitoring migratory birds using cellular sensor networks.	db/conf/ipsn/ipsn2012.html#AnthonyBVDELEW12
1983002	Zichong_Chen,Paolo_Prandoni,Guillermo_Barrenetxea,Martin_Vetterli	2012	Sensorcam: an energy-efficient smart wireless camera for environmental monitoring.	db/conf/ipsn/ipsn2012.html#ChenPBV12
1983004	Roland_Flury,Roger_Wattenhofer	2010	Slotted programming for sensor networks.	db/conf/ipsn/ipsn2010.html#FluryW10
1983006	Raja_Jurdak,Peter_I._Corke,Dhinesh_Dharman,Guillaume_Salagnac,Christopher_Crossman,Philip_Valencia,Greg_Bishop-Hurley	2010	Energy-efficient localization for virtual fencing.	db/conf/ipsn/ipsn2010.html#JurdakCDSCVB10
1983012	Charalambos_Sergiou,Vasos_Vassiliou	2010	Energy hole prevention in wireless sensor networks.	db/conf/ipsn/ipsn2010.html#SergiouV10a
1983018	Wenzhu_Zhang,Lin_Zhang_0001	2012	Understanding city dynamics by manifold learning correlation analysis.	db/conf/ipsn/ipsn2012.html#ZhangZ12
1983022	Jiakang_Lu,Kamin_Whitehouse	2012	SunCast: fine-grained prediction of natural sunlight levels for improved daylight harvesting.	db/conf/ipsn/ipsn2012.html#LuW12
1983023	Xiaopei_Wu,Mingyan_Liu	2012	In-situ soil moisture sensing: measurement scheduling and estimation using compressive sensing.	db/conf/ipsn/ipsn2012.html#WuL12
1983024	Joshua_Ellul,Kirk_Martinez	2010	Run-time compilation of bytecode in wireless sensor networks.	db/conf/ipsn/ipsn2010.html#EllulM10
1983026	Georg_Wittenburg,Norman_Dziengel,Christian_Wartenburger,Jochen_H._Schiller	2010	A system for distributed event detection in wireless sensor networks.	db/conf/ipsn/ipsn2010.html#WittenburgDWS10
1983030	Jung-Hyun_Jun,Sunardi_Sunardi,Lijuan_Wang,Joel_W._Matthys,Simon_Lui,Yu_Gu_0001	2012	Sensor-enabled yo-yos as new musical instruments.	db/conf/ipsn/ipsn2012.html#JunSWMLG12
1983032	Carlo_Alberto_Boano,Matteo_Lasagni,mer,Tanja_Lange_0002	2011	Poster abstract: Accurate monitoring of circardian rhythms using wearable Body Sensor Networks.	db/conf/ipsn/ipsn2011.html#BoanoLRL11
1983036	Wen_Hu,Brano_Kusy,Christian_Richter,nig,Cong_Huynh	2011	Demo abstract: Radio-diversity collection tree protocol.	db/conf/ipsn/ipsn2011.html#HuKRBH11
1983040	Miroslav_Pajic,Zhihao_Jiang,Allison_Connolly,Sanjay_Dixit,Rahul_Mangharam	2010	A platform for implantable medical device validation.	db/conf/ipsn/ipsn2010.html#PajicJCDM10
1983042	Hongyan_Wang,Md._Yusuf_Sarwar_Uddin,Guo-Jun_Qi,Tom_Huang,Tarek_F._Abdelzaher,Guohong_Cao	2011	PhotoNet: A similarity-aware image delivery service for situation awareness.	db/conf/ipsn/ipsn2011.html#WangUQHAC11
1983045	Doug_Hakkarinen,Tracy_Camp,Allan_Haas,Andre_Revil	2011	Near-real-time analysis for REACTS.	db/conf/ipsn/ipsn2011.html#HakkarinenCHR11
1983048	r_Alemdar,khan_Remzi_Yavuz,zen,Yunus_Emre_Kara,zlem_Durmaz_Incel,Lale_Akarun,Cem_Ersoy	2010	Multi-modal fall detection within the WeCare framework.	db/conf/ipsn/ipsn2010.html#AlemdarYOKIAE10
1983049	Jason_Waterman,Bryan_Kate,Karthik_Dantu,Matt_Welsh	2012	Simbeeotic: a simulation-emulation platform for large scale micro-aerial swarms.	db/conf/ipsn/ipsn2012.html#WatermanKDW12
1983052	Sarfraz_Nawaz,Niki_Trigoni	2011	Convex programming based robust localization in NLOS prone cluttered environments.	db/conf/ipsn/ipsn2011.html#NawazT11
1983063	Ossi_Kaltiokallio,Maurizio_Bocca,Lasse_Eriksson	2010	Distributed RSSI processing for intrusion detection in indoor environments.	db/conf/ipsn/ipsn2010.html#KaltiokallioBE10
1983067	Aveek_Purohit,Zheng_Sun,Frank_Mokaya,Pei_Zhang	2011	SensorFly: Controlled-mobile sensing platform for indoor emergency response applications.	db/conf/ipsn/ipsn2011.html#PurohitSMZ11
1983069	Ye-Sheng_Kuo,Thomas_Schmid,Prabal_Dutta	2012	A compact, inexpensive, and battery-powered software-defined radio platform.	db/conf/ipsn/ipsn2012.html#KuoSD12
1983073	Philipp_M._Glatz,Christian_Steger,Reinhold_Weiss	2010	TOSPIE2: tiny operating system plug-in for energy estimation.	db/conf/ipsn/ipsn2010.html#GlatzSW10
1983077	Yongpan_Liu,Yiqun_Wang,Hongyang_Jia,Shan_Su,Jinghuan_Wen,Wenzhu_Zhang,Lin_Zhang_0001,Huazhong_Yang	2012	An energy harvesting nonvolatile sensor node and its application to distributed moving object detection.	db/conf/ipsn/ipsn2012.html#LiuWJSWZZY12
1983080	l_Le_Borgne,Ã©,Kris_Steenhaut,Etro_Lab,Gianluca_Bontempi	2010	Demonstrating principal component aggregation for distributed spatial pattern recognition.	db/conf/ipsn/ipsn2010.html#BorgneNSLB10
1983084	Bo_Wei,Mingrui_Yang,Rajib_Kumar_Rana,Chun_Tung_Chou,Wen_Hu	2012	Distributed sparse approximation for frog sound classification.	db/conf/ipsn/ipsn2012.html#WeiYRCH12
1983090	Chenren_Xu,Bernhard_Firner,Yanyong_Zhang,Richard_E._Howard,Jun_Li,Xiaodong_Lin	2012	Improving RF-based device-free passive localization in cluttered indoor environments through probabilistic classification methods.	db/conf/ipsn/ipsn2012.html#XuFZHLL12
1983091	Pat_Pannuto,Yoonmyung_Lee,Benjamin_P._Kempke,Dennis_Sylvester,David_Blaauw,Prabal_Dutta	2012	Ultra-constrained sensor platform interfacing.	db/conf/ipsn/ipsn2012.html#PannutoLKSBD12
1983092	Daniele_Puccinelli,Silvia_Giordano	2010	Neighbor tables in sensor network routing.	db/conf/ipsn/ipsn2010.html#PuccinelliG10
1983100	Stephen_Chong,Christian_Skalka,Jeffrey_A._Vaughan	2010	Self-identifying sensor data.	db/conf/ipsn/ipsn2010.html#ChongSV10
1983116	Johannes_Schneider,Roger_Wattenhofer	2011	Poster abstract: Three plane localization.	db/conf/ipsn/ipsn2011.html#SchneiderW11
1983125	Juo-Yu_Lee,Zac_Harlow,Travis_C._Collier,Charles_E._Taylor,Kung_Yao	2012	A beamforming method for multiple source DOA estimation, spectrum separation and localization from field data.	db/conf/ipsn/ipsn2012.html#LeeHCTY12
1983134	Bodhi_Priyantha,Dimitrios_Lymberopoulos,Jie_Liu	2010	Enabling energy efficient continuous sensing on mobile phones with LittleRock.	db/conf/ipsn/ipsn2010.html#PriyanthaLL10
1983135	Mohammad_Sajjad_Hossain,Vijay_Raghunathan	2010	AEGIS: a rule based framework for traffic gatekeeping in wireless sensor networks.	db/conf/ipsn/ipsn2010.html#HossainR10
1983140	Claro_Noda,Shashi_Prabh,Carlo_Alberto_Boano,Thiemo_Voigt,rio_Alves	2011	Poster abstract: A channel quality metric for interference-aware wireless sensor networks.	db/conf/ipsn/ipsn2011.html#NodaPBVA11
1983142	Rik_Sarkar,Wei_Zeng,Jie_Gao,Xianfeng_David_Gu	2010	Covering space for in-network sensor data storage.	db/conf/ipsn/ipsn2010.html#SarkarZGG10
1983147	Cheng-Yuan_Li,Hao-Hua_Chu	2012	BlimpProbe: an aerial surveillance platform.	db/conf/ipsn/ipsn2012.html#LiC12
1983151	Kerri_Stone,Brian_Hoenes,Tracy_Camp	2011	Hardware platform for wireless geophysical monitoring.	db/conf/ipsn/ipsn2011.html#StoneHC11
1983153	Chun-Yu_Lin,Huang-Chen_Lee,Wei-Hsuan_Lee,Chen-Lung_Chan,Chung-Ta_King	2010	SenPro: concurrent system profiling for wireless sensor networks.	db/conf/ipsn/ipsn2010.html#LinLLCK10
1983154	Andrew_Robinson,Sonal_Verma,Prabal_Dutta	2012	AudioDAQ: turning the mobile phone's headset port into a universal data acquisition interface.	db/conf/ipsn/ipsn2012.html#RobinsonVD12
1983158	Mitsuhiro_Kashiwada,Kazuhisa_Asakawa,Norihisa_Segawa,Jun_Sawamoto,Haruo_Tamaki,Masato_Yazawa	2011	Proposed long-distance communication in sensor network using weak radio waves and DSP.	db/conf/ipsn/ipsn2011.html#KashiwadaASSTY11
1983161	Saket_Sathe,Sebastian_Cartier,Dipanjan_Chakraborty_0001,Karl_Aberer	2012	Effectively modeling data from large-area community sensor networks.	db/conf/ipsn/ipsn2012.html#SatheCCA12
1983171	Enamul_Hoque,John_A._Stankovic	2010	Monitoring quantity and quality of sleeping using WISPs.	db/conf/ipsn/ipsn2010.html#HoqueS10
1983180	Rajib_Kumar_Rana,Chun_Tung_Chou,Salil_S._Kanhere,Nirupama_Bulusu,Wen_Hu	2010	Ear-phone: an end-to-end participatory urban noise mapping system.	db/conf/ipsn/ipsn2010.html#RanaCKBH10
1983187	Tao_Liu,Alberto_Cerpa	2011	Foresee (4C): Wireless link prediction using link features.	db/conf/ipsn/ipsn2011.html#LiuC11
1983190	gila_Bitsch_Link,Thomas_Bretgeld,Goliath,Klaus_Wehrle	2010	RatMote: a sensor platform for animal habitat monitoring.	db/conf/ipsn/ipsn2010.html#LinkBGW10
1983196	Mohammad_Sajjad_Hossain,A._B._M._Alim_Al_Islam,Milind_Kulkarni,Vijay_Raghunathan	2011	SETL: A set based programming abstraction for wireless sensor networks.	db/conf/ipsn/ipsn2011.html#HossainIKR11
1983204	Kumar_Viswanatha,Sharadh_Ramaswamy,Ankur_Saxena,Kenneth_Rose	2012	Error-resilient and complexity-constrained distributed coding for large scale sensor networks.	db/conf/ipsn/ipsn2012.html#ViswanathaRSR12
1983214	Mohammad_Maifi_Hasan_Khan,Hieu_Khac_Le,Michael_LeMay,Paria_Moinzadeh,Lili_Wang,Yong_Yang,Dong_Kun_Noh,Tarek_F._Abdelzaher,Carl_A._Gunter,Jiawei_Han,Xin_Jin	2010	Diagnostic powertracing for sensor node failure analysis.	db/conf/ipsn/ipsn2010.html#KhanLLMWYNAGHJ10
1983215	Muhammad_M._Rahman,Henry_E._Baidoo-Williams,Raghuraman_Mudumbai,Soura_Dasgupta	2012	Fully wireless implementation of distributed beamforming on a software-defined radio platform.	db/conf/ipsn/ipsn2012.html#RahmanBMD12
1983216	Xiaoye_Jiang,Mo_Li,Yuan_Yao,Leonidas_J._Guibas	2011	Overcomplete Radon bases for target property management in sensor networks.	db/conf/ipsn/ipsn2011.html#JiangLYG11
1983222	Vinaitheerthan_Sundaram,Patrick_Eugster,Xiangyu_Zhang	2011	Demo abstract: Diagnostic tracing of wireless sensor networks with TinyTracer.	db/conf/ipsn/ipsn2011.html#SundaramEZ11
1983225	Hieu_Khac_Le,Jeff_Pasternack,Hossein_Ahmadi,Manish_Gupta_0001,Yizhou_Sun,Tarek_F._Abdelzaher,Jiawei_Han,Dan_Roth,Boleslaw_K._Szymanski,Sibel_Adali	2011	Apollo: Towards factfinding in participatory sensing.	db/conf/ipsn/ipsn2011.html#LePAGSAHRSA11
1983227	Samuel_DeBruin,Jerome_Grunnagle,Prabal_Dutta	2012	Scaling the wireless AC power meter.	db/conf/ipsn/ipsn2012.html#DeBruinGD12
1983228	Chenren_Xu,Bernhard_Firner,Yanyong_Zhang,Richard_E._Howard,Jun_Li	2012	Exploiting human mobility trajectory information in indoor device-free passive tracking.	db/conf/ipsn/ipsn2012.html#XuFZHL12
1983235	Xiang_Yun,Lan_S._Bai,Ricardo_Piedrahita,Robert_P._Dick,Qin_Lv,Michael_Hannigan,Li_Shang	2012	Collaborative calibration and sensor placement for mobile sensor networks.	db/conf/ipsn/ipsn2012.html#YunBPDLHS12
1983244	Mohammad_Maifi_Hasan_Khan,Hossein_Ahmadi,Gulustan_Dogan,Kannan_Govindan,Raghu_K._Ganti,Theodore_Brown,Jiawei_Han,Prasant_Mohapatra,Tarek_F._Abdelzaher	2011	DustDoctor: A self-healing sensor data collection system.	db/conf/ipsn/ipsn2011.html#KhanADGGBHMA11
1983246	Thomas_Schmid,Prabal_Dutta,Mani_B._Srivastava	2010	High-resolution, low-power time synchronization an oxymoron no more.	db/conf/ipsn/ipsn2010.html#SchmidDS10
1983247	Jyh-How_Huang,Po-Yen_Lin,Yu-Te_Huang,Seng-Yong_Lau,Ling-Jyh_Chen,Kun-Chan_Lan,Hao-Hua_Chu,Polly_Huang	2010	User-centric radio power control for opportunistic mountain hiking networks.	db/conf/ipsn/ipsn2010.html#HuangLHLCLCH10
1983248	Hailun_Tan,Wen_Hu,Sanjay_Jha	2010	A hardware-based remote attestation protocol in wireless sensor networks.	db/conf/ipsn/ipsn2010.html#TanHJ10
1983252	Scott_Moeller,Avinash_Sridharan,Bhaskar_Krishnamachari,Omprakash_Gnawali	2010	Routing without routes: the backpressure collection protocol.	db/conf/ipsn/ipsn2010.html#MoellerSKG10
1983259	Matthias_Keller,Jan_Beutel	2011	Demo abstract: Efficient data retrieval for interactive browsing of large sensor network data sets.	db/conf/ipsn/ipsn2011.html#KellerB11
1983260	Yu_Wang_0020,Rui_Tan,Guoliang_Xing,Jianxun_Wang,Xiaobo_Tan	2012	Accuracy-aware aquatic diffusion process profiling using robotic sensor networks.	db/conf/ipsn/ipsn2012.html#WangTXWT12
1983266	Benjamin_P._Kempke,Prabal_Dutta	2012	RF time-of-flight ranging on commodity software radios.	db/conf/ipsn/ipsn2012.html#KempkeD12
2154928	rkowski,Brenton_D._Walker	2011	The first mobility data contest hosted at the ACM HotPlanet'11 workshop.	db/conf/mobisys/hotplanet2011.html#PiorkowskiW11
2154934	Youngki_Lee,Younghyun_Ju,Chulhong_Min,Seungwoo_Kang,Yunseok_Rhee,Junehwa_Song	2011	Demo: CoMon - resource-aware cooperative context monitoring system for smartphone-centric sensor-rich pans.	db/conf/mobisys/mobisys2011.html#LeeJMKRS11
2154938	Michal_Ficek,s_Pop,cil,Ã¡,Lukas_Kencl,Martin_Tomek	2010	Performance study of active tracking in a cellular network using a modular signaling platform.	db/conf/mobisys/mobisys2010.html#FicekPVDKT10
2154945	Eric_Rozner,Vishnu_Navda,Ramachandran_Ramjee,Shravan_K._Rayanchu	2010	NAPman: network-assisted power management for wifi devices.	db/conf/mobisys/mobisys2010.html#RoznerNRR10
2154946	Meddage_S._Fernando,Pushkar_M._Mulay,Michael_A._Cartwright,Daming_D._Chen,Amiya_Bhattacharya,Partha_Dasgupta	2011	Demo: spanning an underlay over a host WPAN cluster.	db/conf/mobisys/mobisys2011.html#FernandoMCCBD11
2154948	Jaewoo_Chung,Matt_Donahoe,Chris_Schmandt,Ig-Jae_Kim,Pedram_Razavai,Micaela_Wiseman	2011	Indoor location sensing using geo-magnetism.	db/conf/mobisys/mobisys2011.html#ChungDSKRW11
2154951	Raghu_K._Ganti,Nam_Pham,Hossein_Ahmadi,Saurabh_Nangia,Tarek_F._Abdelzaher	2010	GreenGPS: a participatory sensing fuel-efficient maps application.	db/conf/mobisys/mobisys2010.html#GantiPANA10
2154955	Tian_Hao,Ruogu_Zhou,Guoliang_Xing	2012	Demo: a barcode streaming system for smartphones.	db/conf/mobisys/mobisys2012.html#HaoZX12a
2154961	Jeongyeup_Paek,Kyu-Han_Kim,Jatinder_Pal_Singh,Ramesh_Govindan	2011	Energy-efficient positioning for smartphones using Cell-ID sequence matching.	db/conf/mobisys/mobisys2011.html#PaekKSG11
2154968	Zhenyun_Zhuang,Kyu-Han_Kim,Jatinder_Pal_Singh	2010	Improving energy efficiency of location sensing on smartphones.	db/conf/mobisys/mobisys2010.html#ZhuangKS10
2154969	Andreas_Konstantinidis_0002,Georgios_Chatzimilioudis,Christos_Laoudias,Silouanos_Nicolaou,Demetrios_Zeinalipour-Yazti	2012	Towards planet-scale localization on smartphones with a partial radiomap.	db/conf/mobisys/hotplanet2012.html#0002CLNZ12
2154971	Feng_Qian,Kee_Shen_Quah,Junxian_Huang,Jeffrey_Erman,Alexandre_Gerber,Zhuoqing_Morley_Mao,Subhabrata_Sen,Oliver_Spatscheck	2012	Web caching on smartphones: ideal vs. reality.	db/conf/mobisys/mobisys2012.html#QianQHEGMSS12
2154972	Joshua_Hare,Lance_Hartung,Suman_Banerjee	2012	Beyond deployments and testbeds: experiences with public usage on vehicular WiFi hotspots.	db/conf/mobisys/mobisys2012.html#HareHB12
2154986	Octav_Chipara,William_G._Griswold,Anders_Nilsson_Plymoth,Ricky_Huang,Fang_Liu,Per_Johansson,Ramesh_R._Rao,Theodore_C._Chan,Colleen_Buono	2012	WIISARD: a measurement study of network properties and protocol reliability during an emergency response.	db/conf/mobisys/mobisys2012.html#ChiparaGPHLJRCB12
2154987	Chuan_Qin,Xuan_Bao,Romit_Roy_Choudhury,Srihari_Nelakuditi	2011	Demo: an out-of-band alternative to face recognition.	db/conf/mobisys/mobisys2011.html#QinBCN11a
2154998	Valentin_Radu,Jiwei_Li,Lito_Kriara,Mahesh_K._Marina,Richard_Mortier	2012	Poster: a hybrid approach for indoor mobile phone localization.	db/conf/mobisys/mobisys2012.html#RaduLKMM12
2155022	Rajesh_Krishna_Balan,Khoa_Xuan_Nguyen,Lingxiao_Jiang	2011	Real-time trip information service for a large taxi fleet.	db/conf/mobisys/mobisys2011.html#BalanNJ11
2155030	Shivsubramani_Krishnamoorthy,Ashok_K._Agrawala	2011	Poster: a context-aware framework for mobile applications.	db/conf/mobisys/mobisys2011.html#KrishnamoorthyA11
2155031	Lorenzo_Keller,Anh_Le,Blerim_Cici,Hulya_Seferoglu,Christina_Fragouli,Athina_Markopoulou	2012	MicroCast: cooperative video streaming on smartphones.	db/conf/mobisys/mobisys2012.html#KellerLCSFM12
2155032	Domenico_Giustiniano,Stefan_Mangold	2011	Demo: distance tracking using WLAN time of flight.	db/conf/mobisys/mobisys2011.html#GiustinianoM11
2155033	Tian_Hao,Ruogu_Zhou,Guoliang_Xing	2012	COBRA: color barcode streaming for smartphone systems.	db/conf/mobisys/mobisys2012.html#HaoZX12
2155042	Hiroki_Furusho,Kenji_Hisazumi,Takeshi_Kamiyama,Hiroshi_Inamura,Tsuneo_Nakanishi,Akira_Fukuda	2012	Poster: an energy profiler for android applications used in the real world.	db/conf/mobisys/mobisys2012.html#FurushoHKINF12
2155046	Gautam_S._Thakur,Pan_Hui,Ahmed_Helmy	2012	Poster: a framework to sense planet-scale vehicular mobility using online traffic webcameras.	db/conf/mobisys/mobisys2012.html#ThakurHH12
2155052	Conor_Higgins,ine_Kearns,Sue_Franklin	2012	Poster: the development of a semantic feature analysis based mobile application for individuals with aphasia.	db/conf/mobisys/mobisys2012.html#HigginsKF12
2155058	Souvik_Sen,Bozidar_Radunovic,Romit_Roy_Choudhury,Tom_Minka	2011	Precise indoor localization using PHY information.	db/conf/mobisys/mobisys2011.html#SenRCM11
2155060	Thiago_Henrique_Silva,Pedro_Olmo_Stancioli_Vaz_de_Melo,Jussara_Marques_de_Almeida,Antonio_Alfredo_Ferreira_Loureiro	2012	Uncovering properties in participatory sensor networks.	db/conf/mobisys/hotplanet2012.html#SilvaMAL12
2155065	Kristian_Evensen,Andreas_Petlund,Haakon_Riiser,Paul_Vigmostad,Dominik_Kaspar,Carsten_Griwodz,l_Halvorsen	2011	Demo: quality-adaptive video streaming with dynamic bandwidth aggregation on roaming, multi-homed clients.	db/conf/mobisys/mobisys2011.html#EvensenPRVKGH11
2155074	Christopher_Gwilliams,Alun_D._Preece,Alex_R._Hardisty	2012	Poster: using local and global knowledge in wireless sensor networks.	db/conf/mobisys/mobisys2012.html#GwilliamsPH12
2155076	Hao_Han,Yunxin_Liu,Guobin_Shen,Yongguang_Zhang,Qun_Li	2012	DozyAP: power-efficient Wi-Fi tethering.	db/conf/mobisys/mobisys2012.html#HanLSZL12
2155079	He_Wang,Souvik_Sen,Ahmed_Elgohary,Moustafa_Farid,Moustafa_Youssef,Romit_Roy_Choudhury	2012	No need to war-drive: unsupervised indoor localization.	db/conf/mobisys/mobisys2012.html#WangSEFYC12
2155080	Junxian_Huang,Qiang_Xu,Birjodh_Tiwana,Zhuoqing_Morley_Mao,Ming_Zhang,Paramvir_Bahl	2010	Anatomizing application performance differences on smartphones.	db/conf/mobisys/mobisys2010.html#HuangXTMZB10
2155091	Tianyin_Xu,Yang_Chen,Jin_Zhao,Xiaoming_Fu_0001	2010	Cuckoo: towards decentralized, socio-aware online microblogging services and data measurements.	db/conf/mobisys/hotplanet2010.html#XuCZF10
2155101	Wenlong_Yue,Lei_Wang_0005,Ming_Zhu,Zhenquan_Qin,Lei_Shu,Canfeng_Chen	2011	Poster: a green solution for intelligent metropolitan heating system with uSDcard.	db/conf/mobisys/mobisys2011.html#YueWZQSC11
2155105	Bhojan_Anand,Karthik_Thirugnanam,Jeena_Sebastian,Pravein_G._Kannan,Akkihebbal_L._Ananda,Mun_Choon_Chan,Rajesh_Krishna_Balan	2011	Adaptive display power management for mobile games.	db/conf/mobisys/mobisys2011.html#AnandTSKACB11
2155116	Justin_Gregory_Manweiler,Puneet_Jain,Romit_Roy_Choudhury	2012	Satellites in our pockets: an object positioning system using smartphones.	db/conf/mobisys/mobisys2012.html#ManweilerJC12
2155117	Rosalind_W._Picard	2010	Mobile emotional intelligence.	db/conf/mobisys/mobisys2010.html#Picard10
2155124	Deborah_Estrin	2010	Participatory sensing: applications and architecture.	db/conf/mobisys/mobisys2010.html#Estrin10
2155131	Andreas_Konstantinidis_0002,Constantinos_Costa,Georgios_Larkou,Demetrios_Zeinalipour-Yazti	2012	Demo: a programming cloud of smartphones.	db/conf/mobisys/mobisys2012.html#KonstantinidisCLZ12
2155138	Kaisen_Lin,Aman_Kansal,Dimitrios_Lymberopoulos,Feng_Zhao	2010	Energy-accuracy trade-off for continuous mobile device location.	db/conf/mobisys/mobisys2010.html#LinKLZ10
2155151	Sibren_Isaacman,Richard_A._Becker,ceres,Margaret_Martonosi,James_Rowland,Alexander_Varshavsky,Walter_Willinger	2012	Human mobility modeling at metropolitan scales.	db/conf/mobisys/mobisys2012.html#IsaacmanBCMRVW12
2155160	Geoffrey_Werner_Challen,Jason_Waterman,Matt_Welsh	2010	IDEA: integrated distributed energy awareness for wireless sensor networks.	db/conf/mobisys/mobisys2010.html#ChallenWW10
2155164	Mian_Dong,Lin_Zhong	2011	Demo: sesame: self-constructive system energy modeling for battery-powered mobile systems.	db/conf/mobisys/mobisys2011.html#DongZ11b
2155165	Suhas_Mathur,Tong_Jin,Nikhil_Kasturirangan,Janani_Chandrasekaran,Wenzhi_Xue,Marco_Gruteser,Wade_Trappe	2010	ParkNet: drive-by sensing of road-side parking statistics.	db/conf/mobisys/mobisys2010.html#MathurJKCXGT10
2155166	Nan_Jiang,Yu_Jin_0001,Ann_Skudlark,Wen-Ling_Hsu,Guy_Jacobson,Siva_Prakasam,Zhi-Li_Zhang	2012	Isolating and analyzing fraud activities in a large cellular network via voice call graph analysis.	db/conf/mobisys/mobisys2012.html#JiangJSHJPZ12
2155174	Ahmed_N._Alazzawi,Alia_I._Abdelmoty,Christopher_B._Jones	2010	Toward a common model and a markup language for personal gazetteers.	db/conf/mobisys/hotplanet2010.html#AlazzawiAJ10
2155178	Sandesh_Uppoor,Marco_Fiore	2012	Insights on metropolitan-scale vehicular mobility from a networking perspective.	db/conf/mobisys/hotplanet2012.html#UppoorF12
2155182	He_Wang,Souvik_Sen,Alexander_Mariakakis,Romit_Roy_Choudhury,Ahmed_Elgohary,Moustafa_Farid,Moustafa_Youssef	2012	Demo: unsupervised indoor localization.	db/conf/mobisys/mobisys2012.html#WangSMCEFY12
2155189	Jianxun_Zhu,Gerald_Stanje,Robert_Margolies,Maria_Gorlatova,John_Sarik,Zainab_Noorbhaiwala,Paul_Miller,Marcin_Szczodrak,Baradwaj_Vigraham,Luca_P._Carloni,Peter_R._Kinget,Ioannis_Kymissis,Gil_Zussman	2011	Demo: prototyping UWB-enabled enhants.	db/conf/mobisys/mobisys2011.html#ZhuSMGSNMSVCKKZ11
2155192	Taiwoo_Park,Inseok_Hwang,Uichin_Lee,Sunghoon_Ivan_Lee,Chungkuk_Yoo,Youngki_Lee,Hyukjae_Jang,Sungwon_Peter_Choe,Souneil_Park,Junehwa_Song	2012	ExerLink: enabling pervasive social exergames with heterogeneous exercise devices.	db/conf/mobisys/mobisys2012.html#ParkHLLYLJCPS12
2155198	Moo-Ryong_Ra,Anmol_Sheth,Lily_B._Mummert,Padmanabhan_Pillai,David_Wetherall,Ramesh_Govindan	2011	Odessa: enabling interactive perception applications on mobile devices.	db/conf/mobisys/mobisys2011.html#RaSMPWG11
2155199	Jin_Xie,Wei_Hu,Zhenghao_Zhang	2011	Revisiting partial packet recovery in 802.11 wireless LANs.	db/conf/mobisys/mobisys2011.html#XieHZ11
2155201	Dong_Li,Zijiang_Wang,Chenda_Hou,Le_Zhang,Ze_Zhao,Li_Cui	2012	Demo: SmartLake: lightweight sensing and optimizing cleanup of algae blooms on Taihu Lake.	db/conf/mobisys/mobisys2012.html#LiWHZZC12
2155203	Michael_C._Grace,Yajin_Zhou,Qiang_Zhang,Shihong_Zou,Xuxian_Jiang	2012	RiskRanker: scalable and accurate zero-day android malware detection.	db/conf/mobisys/mobisys2012.html#GraceZZZJ12
2155209	Ravi_Kokku,Rajesh_Mahindra,Sampath_Rangarajan,Honghai_Zhang	2011	Opportunistic alignment of advertisement delivery with cellular basestation overloads.	db/conf/mobisys/mobisys2011.html#KokkuMRZ11
2155214	Adam_Lackorzynski,Maria_Elizabeth_Gonzalez,Attila_Bilgic,Hans_Bauernfeind	2011	Poster: evaluation of the industrial suitability of a software platform for future smartphones.	db/conf/mobisys/mobisys2011.html#LackorzynskiGBB11
2155216	Justin_Manweiler,Sharad_Agarwal,Ming_Zhang,Romit_Roy_Choudhury,Paramvir_Bahl	2011	Switchboard: a matchmaking system for multiplayer mobile games.	db/conf/mobisys/mobisys2011.html#ManweilerAZCB11
2155220	Pengfei_Zhou,Yuanqing_Zheng,Mo_Li	2012	How long to wait?: predicting bus arrival time with mobile phone based participatory sensing.	db/conf/mobisys/mobisys2012.html#ZhouZL12
2155222	Brett_D._Higgins,Jason_Flinn,Thomas_J._Giuli,Brian_Noble,Christopher_Peplin,David_Watson	2012	Informed mobile prefetching.	db/conf/mobisys/mobisys2012.html#HigginsFGNPW12
2155226	Tathagata_Das,Prashanth_Mohan,Venkata_N._Padmanabhan,Ramachandran_Ramjee,Asankhaya_Sharma	2010	PRISM: platform for remote sensing using smartphones.	db/conf/mobisys/mobisys2010.html#DasMPRS10
2155230	Chuan_Qin,Xuan_Bao,Romit_Roy_Choudhury,Srihari_Nelakuditi	2011	TagSense: a smartphone-based approach to automatic image tagging.	db/conf/mobisys/mobisys2011.html#QinBCN11
2155233	Bhojan_Anand,Karthik_Thirugnanam,Jeena_Sebastian,Pravein_G._Kannan,Akkihebbal_L._Ananda,Mun_Choon_Chan,Rajesh_Krishna_Balan	2011	Demo: adaptive display power management for mobile games.	db/conf/mobisys/mobisys2011.html#AnandTSKACB11a
2155243	Taiwoo_Park,Jinwon_Lee,Inseok_Hwang,Chungkuk_Yoo,Lama_Nachman,Junehwa_Song	2011	Demo: e-gesture - a collaborative architecture for energy-efficient gesture recognition with hand-worn sensor and mobile devices.	db/conf/mobisys/mobisys2011.html#ParkLHYNS11
2155247	Suhas_Mathur,Robert_D._Miller,Alexander_Varshavsky,Wade_Trappe,Narayan_B._Mandayam	2011	ProxiMate: proximity-based secure pairing using ambient wireless signals.	db/conf/mobisys/mobisys2011.html#MathurMVTM11
2155252	Abhinav_Pathak,Abhilash_Jindal,Y._Charlie_Hu,Samuel_P._Midkiff	2012	What is keeping my phone awake?: characterizing and detecting no-sleep energy bugs in smartphone apps.	db/conf/mobisys/mobisys2012.html#PathakJHM12
2155253	Lei_Tian,Junho_Ahn,Hanqiang_Cheng,Xinyu_Xing,Yu-Li_Liang,Shivakant_Mishra,David_Chu,Xue_Liu,Richard_Han,Qin_Lv	2012	Demo: MVChat: flasher detection for mobile video chat.	db/conf/mobisys/mobisys2012.html#TianACXLMCLHL12
2155254	Gabriel_Maganis,Elaine_Shi,Hao_Chen_0003,Dawn_Song	2012	Opaak: using mobile phones to limit anonymous identities online.	db/conf/mobisys/mobisys2012.html#MaganisSCS12
2155255	Taiwoo_Park,Inseok_Hwang,Uichin_Lee,Sunghoon_Ivan_Lee,Chungkuk_Yoo,Youngki_Lee,Hyukjae_Jang,Sungwon_Peter_Choe,Souneil_Park,Junehwa_Song	2012	Demo: ExerLink - enabling pervasive social exergames with heterogeneous exercise devices.	db/conf/mobisys/mobisys2012.html#ParkHLLYLJCPS12a
2155257	He_Liu,Stefan_Saroiu,Alec_Wolman,Himanshu_Raj	2012	Software abstractions for trusted sensors.	db/conf/mobisys/mobisys2012.html#LiuSWR12
2155259	Justin_Manweiler,Romit_Roy_Choudhury	2011	Demo: avoiding the rush hours, wifi energy management via traffic isolation.	db/conf/mobisys/mobisys2011.html#ManweilerC11a
2155262	Emmanouil_Koukoumidis,Li-Shiuan_Peh,Margaret_Martonosi	2011	SignalGuru: leveraging mobile phones for collaborative traffic signal schedule advisory.	db/conf/mobisys/mobisys2011.html#KoukoumidisPM11
2155265	Farhana_Ashraf,Yih-Chun_Hu,Robin_Kravets	2011	Demo: bankrupting the jammer.	db/conf/mobisys/mobisys2011.html#AshrafHK11
2155266	Long_Jin,Yang_Chen,Pan_Hui,Cong_Ding,Tianyi_Wang,Athanasios_V._Vasilakos,Beixing_Deng,Xing_Li	2011	Albatross sampling: robust and effective hybrid vertex sampling for social graphs.	db/conf/mobisys/hotplanet2011.html#JinCHDWVDL11
2155270	Eduardo_Cuervo,Aruna_Balasubramanian,Dae-ki_Cho,Alec_Wolman,Stefan_Saroiu,Ranveer_Chandra,Paramvir_Bahl	2010	MAUI: making smartphones last longer with code offload.	db/conf/mobisys/mobisys2010.html#CuervoBCWSCB10
2155272	Henrik_Blunck,rgaard,Christian_Melchior	2012	Poster: evaluating energy consumption of sensing algorithms - solely via models?	db/conf/mobisys/mobisys2012.html#BlunckKM12
2155276	Bhojan_Anand,Akkihebbal_L._Ananda,Mun_Choon_Chan	2011	Demo:	db/conf/mobisys/mobisys2011.html#AnandAC11
2155277	Liqun_Li,Guoliang_Xing,Limin_Sun,Wei_Huangfu,Ruogu_Zhou,Hongsong_Zhu	2011	Exploiting FM radio data system for adaptive clock calibration in sensor networks.	db/conf/mobisys/mobisys2011.html#LiXSHZZ11
2155280	Junxian_Huang,Feng_Qian,Alexandre_Gerber,Zhuoqing_Morley_Mao,Subhabrata_Sen,Oliver_Spatscheck	2012	A close examination of performance and power characteristics of 4G LTE networks.	db/conf/mobisys/mobisys2012.html#HuangQGMSS12
2155301	Emmanouil_Koukoumidis,Li-Shiuan_Peh,Margaret_Martonosi	2011	Demo: SignalGuru: leveraging mobile phones for collaborative traffic signal schedule advisory.	db/conf/mobisys/mobisys2011.html#KoukoumidisPM11a
2155303	Hengchang_Liu,Jingyuan_Li,Zhiheng_Xie,Shan_Lin,Kamin_Whitehouse,John_A._Stankovic,David_J._Siu	2010	Automatic and robust breadcrumb system deployment for indoor firefighter applications.	db/conf/mobisys/mobisys2010.html#LiuLXLWSS10
2155311	Gaetano_Borriello	2011	Open data kit: creating an open source community for mobile data collection.	db/conf/mobisys/hotplanet2011.html#Borriello11
2155314	Pengyu_Zhang,Jeremy_Gummeson,Deepak_Ganesan	2012	BLINK: a high throughput link layer for backscatter communication.	db/conf/mobisys/mobisys2012.html#ZhangGG12
2155320	Sangtae_Ha,Soumya_Sen,Carlee_Joe-Wong,diger_Rill,Mung_Chiang	2012	Demo: enabling mobile time-dependent pricing.	db/conf/mobisys/mobisys2012.html#HaSJRC12
2155351	Ravi_Kokku,Rajesh_Mahindra,Sampath_Rangarajan,Honghai_Zhang	2011	Demo: a system for aligning advertisement delivery with cellular basestation overloads.	db/conf/mobisys/mobisys2011.html#KokkuMRZ11a
2155352	Azeem_J._Khan,Vigneshwaran_Subbaraju,Archan_Misra,Srinivasan_Seshan	2012	Demo: context driven advertisement optimizer.	db/conf/mobisys/mobisys2012.html#KhanSMS12
2155363	Michael_Harding,Nigel_Davies,Tom_Cherrett,Janet_Dickinson,Sarah_Norgate,Chris_Speed	2012	Poster: SixthSense - shaping travel activities through flexible interpretations of time.	db/conf/mobisys/mobisys2012.html#HardingDCDNS12
2155385	Mehedi_Bakht,John_Carlson,Alexander_Loeb,Robin_Kravets	2011	Demo: leveraging clustering for energy-efficient neighbor discovery.	db/conf/mobisys/mobisys2011.html#BakhtCLK11
2155387	Karthik_Navuluri,Kalpesh_Padia,Ajay_Gupta,Tamer_Nadeem	2011	Poster: What's on your mind?: a mind-based driving alert system.	db/conf/mobisys/mobisys2011.html#NavuluriPGN11
2155392	Jeremy_Gummeson,Pengyu_Zhang,Deepak_Ganesan,Nissanka_Bodhi_Priyantha	2012	Demo: NFC-based sensor data caching.	db/conf/mobisys/mobisys2012.html#GummesonZGP12
2155398	Stephen_P._Tarzia,Peter_A._Dinda,Robert_P._Dick,Gokhan_Memik	2011	Demo: indoor localization without infrastructure using the acoustic background spectrum.	db/conf/mobisys/mobisys2011.html#TarziaDDM11a
2155399	Earl_Oliver	2010	Characterizing the transport behaviour of the short message service.	db/conf/mobisys/mobisys2010.html#Oliver10
2155401	Xi_Zhang,Junaid_Ansari,Xuan_Zhu,nen	2012	Demo: a mobility aware cooperative scheme for MAC reconfiguration in cognitive wireless networks.	db/conf/mobisys/mobisys2012.html#ZhangAZM12
2155410	ctor_Soto,nez	2011	Automated land use identification using cell-phone records.	db/conf/mobisys/hotplanet2011.html#SotoF11
2155415	Feng_Qian,Zhaoguang_Wang,Alexandre_Gerber,Zhuoqing_Morley_Mao,Subhabrata_Sen,Oliver_Spatscheck	2011	Demo: mobile application resource optimizer (ARO).	db/conf/mobisys/mobisys2011.html#QianWGMSS11a
2155416	Hossein_Falaki,Ratul_Mahajan,Srikanth_Kandula,Dimitrios_Lymberopoulos,Ramesh_Govindan,Deborah_Estrin	2010	Diversity in smartphone usage.	db/conf/mobisys/mobisys2010.html#FalakiMKLGE10
2155422	Christoph_Borchert,Daniel_Lohmann,Olaf_Spinczyk	2012	CiAO/IP: a highly configurable aspect-oriented IP stack.	db/conf/mobisys/mobisys2012.html#BorchertLS12
2155426	Justin_Manweiler,Puneet_Jain,Romit_Roy_Choudhury	2012	Demo: satellites in our pockets: an object positioning system using smartphones.	db/conf/mobisys/mobisys2012.html#ManweilerJC12a
2155428	Riccardo_Crepaldi,Mehedi_Bakht,Tarek_F._Abdelzaher,Robin_Kravets	2011	Demo: Illinois vehicular project, live data sampling and energy-efficient node discovery.	db/conf/mobisys/mobisys2011.html#CrepaldiBAK11
2155430	Rijurekha_Sen,Bhaskaran_Raman,Prashima_Sharma	2010	Horn-ok-please.	db/conf/mobisys/mobisys2010.html#SenRS10
2155431	Matthew_Boyle,Avraham_Klausner,David_Starobinski,Ari_Trachtenberg,Hongchang_Wu	2011	Poster: gait-based smartphone user identification.	db/conf/mobisys/mobisys2011.html#BoyleKSTW11
2155434	Xuan_Bao,Romit_Roy_Choudhury	2010	MoVi: mobile phone based video highlights via collaborative sensing.	db/conf/mobisys/mobisys2010.html#BaoC10
2155440	Adel_Javanmard,Maya_Haridasan,Li_Zhang	2012	Poster: multi-track map matching.	db/conf/mobisys/mobisys2012.html#JavanmardHZ12
2155446	Rod_Meikle,Joseph_Camp	2012	A global measurement study of context-based propagation and user mobility.	db/conf/mobisys/hotplanet2012.html#MeikleC12
2155451	Jun-geun_Park,Ben_Charrow,Dorothy_Curtis,Jonathan_Battat,Einat_Minkov,Jamey_Hicks,Seth_J._Teller,Jonathan_Ledlie	2010	Growing an organic indoor location system.	db/conf/mobisys/mobisys2010.html#ParkCCBMHTL10
2155461	Krishna_P._N._Puttaswamy,Catherine_C._Marshall,Venugopalan_Ramasubramanian,Patrick_Stuedi,Douglas_B._Terry,Ted_Wobber	2010	Docx2Go: collaborative editing of fidelity reduced documents on mobile devices.	db/conf/mobisys/mobisys2010.html#PuttaswamyMRSTW10
2155477	Yin_Chen,Dimitrios_Lymberopoulos,Jie_Liu,Bodhi_Priyantha	2012	FM-based indoor localization.	db/conf/mobisys/mobisys2012.html#ChenLLP12
2155482	Tingxin_Yan,Vikas_Kumar,Deepak_Ganesan	2010	CrowdSearch: exploiting crowds for accurate real-time image search on mobile phones.	db/conf/mobisys/mobisys2010.html#YanKG10
2155502	Moo-Ryong_Ra,Bin_Liu_0004,Thomas_F._La_Porta,Ramesh_Govindan	2012	Medusa: a programming framework for crowd-sensing applications.	db/conf/mobisys/mobisys2012.html#Ra0PG12
2155516	Xuan_Bao,Aman_Kansal,Romit_Roy_Choudhury,Paramvir_Bahl,David_Chu,Alec_Wolman	2012	Poster: supporting collaborative sensing applications.	db/conf/mobisys/mobisys2012.html#BaoKCBCW12
2155517	Gerald_DeJean,Jeff_Herron,Jie_Liu,Darko_Kirovski	2012	Demo: Bluetooth TouchPoint.	db/conf/mobisys/mobisys2012.html#DeJeanHLK12
2155518	Pan_Hui,Richard_Mortier,rkowski,Tristan_Henderson,Jon_Crowcroft	2010	Planet-scale human mobility measurement.	db/conf/mobisys/hotplanet2010.html#HuiMPHC10
2155529	Hyojeong_Shin,Yohan_Chon,Kwanghyo_Park,Hojung_Cha	2011	FindingMiMo: tracing a missing mobile phone using daily observations.	db/conf/mobisys/mobisys2011.html#ShinCPC11
2155536	Christos_Laoudias,George_Constantinou,Marios_Constantinides,Silouanos_Nicolaou,Demetrios_Zeinalipour-Yazti,Christos_G._Panayiotou	2012	Demo: the airplace indoor positioning platform.	db/conf/mobisys/mobisys2012.html#LaoudiasCCNZP12
2155540	Erika_Chin,Adrienne_Porter_Felt,Kate_Greenwood,David_Wagner	2011	Analyzing inter-application communication in Android.	db/conf/mobisys/mobisys2011.html#ChinFGW11
2155544	Theus_Hossmann,Christos_Efstratiou,Cecilia_Mascolo	2012	Collecting big datasets of human activity one checkin at a time.	db/conf/mobisys/hotplanet2012.html#HossmannEM12
2155545	Chulhong_Min,Wookhyun_Han,Inseok_Hwang,Sang_Jeong_Lee,Youngki_Lee,Insik_Shin,Junehwa_Song	2012	Poster: towards mobile GPU-accelerated context processing for continuous sensing applications on smartphones.	db/conf/mobisys/mobisys2012.html#MinHHLLSS12
2155549	Earl_Oliver	2010	The challenges in large-scale smartphone user studies.	db/conf/mobisys/hotplanet2010.html#Oliver10a
2155550	Gautam_S._Thakur,Pan_Hui,Ahmed_Helmy	2012	A framework for realistic vehicular network modeling using planet-scale public webcams.	db/conf/mobisys/hotplanet2012.html#ThakurHH12a
2155551	Liqun_Li,Guoliang_Xing,Limin_Sun,Wei_Huangfu,Ruogu_Zhou,Hongsong_Zhu	2011	Demo: a sensor network time synchronization protocol based on fm radio data system.	db/conf/mobisys/mobisys2011.html#LiXSHZZ11a
2155554	Moo-Ryong_Ra,Bin_Liu_0004,Thomas_F._La_Porta,Ramesh_Govindan	2012	Demo: Medusa: a programming framework for crowd-sensing applications.	db/conf/mobisys/mobisys2012.html#Ra0PG12a
2155564	Michael_Varga,Ashwin_Ashok,Marco_Gruteser,Narayan_B._Mandayam,Wenjia_Yuan,Kristin_J._Dana	2011	Demo: visual MIMO based LED - camera communication applied to automobile safety.	db/conf/mobisys/mobisys2011.html#VargaAGMYD11
2155571	Pengfei_Zhou,Yuanqing_Zheng,Mo_Li	2012	Demo: how long to wait?: predicting bus arrival time with mobile phone based participatory sensing.	db/conf/mobisys/mobisys2012.html#ZhouZL12a
2155572	Zengbin_Zhang,David_Chu,Xiaomeng_Chen,Thomas_Moscibroda	2012	Demo: phone-to-phone mobile motion gaming on commodity phones.	db/conf/mobisys/mobisys2012.html#ZhangCCM12a
2155573	Miguel_Elias_M._Campista,Marcelo_Dias_de_Amorim,s_Henrique_Maciel_Kosmalski_Costa	2012	Big wireless measurement campaigns: are they really worth the price?	db/conf/mobisys/hotplanet2012.html#CampistaAC12
2155584	Jeremy_Gummeson,Pengyu_Zhang,Deepak_Ganesan	2012	Flit: a bulk transmission protocol for RFID-scale sensors.	db/conf/mobisys/mobisys2012.html#GummesonZG12
2155592	Jeffrey_Bickford,s_Lagar-Cavilla,Alexander_Varshavsky,Vinod_Ganapathy,Liviu_Iftode	2011	Security versus energy tradeoffs in host-based mobile malware detection.	db/conf/mobisys/mobisys2011.html#BickfordLVGI11
2155593	Byung-Gon_Chun,Carlo_Curino,Russell_Sears,Alexander_Shraer,Samuel_Madden,Raghu_Ramakrishnan	2012	Mobius: unified messaging and data serving for mobile apps.	db/conf/mobisys/mobisys2012.html#ChunCSSMR12
2155602	Youngki_Lee,Younghyun_Ju,Chulhong_Min,Seungwoo_Kang,Inseok_Hwang,Junehwa_Song	2012	CoMon: cooperative ambience monitoring platform with continuity and benefit awareness.	db/conf/mobisys/mobisys2012.html#LeeJMKHS12
2155608	Kuldeep_Yadav,Vibhas_Kumar,Shrey_Jairath,Rushil_Khurana,Vinayak_S._Naik,Amarjeet_Singh	2012	Poster: cloud-enabled content search and sharing system for mobile phones (MobiShare).	db/conf/mobisys/mobisys2012.html#YadavKJKNS12
2155614	Shahriyar_Amini,Janne_Lindqvist,Jason_I._Hong,Jialiu_Lin,Eran_Toch,Norman_M._Sadeh	2011	: caching location-enhanced content to improve user privacy.	db/conf/mobisys/mobisys2011.html#AminiLHLTS11
2155621	Christine_Jardak,rvi,nen	2010	Extremely large-scale sensing applications for planetary WSNs.	db/conf/mobisys/hotplanet2010.html#JardakRM10
2155627	Ljubica_Pajevic,Emre_A._Yavuz,lafur_Ragnar_Helgason,Gunnar_Karlsson,Sylvia_T._Kouyoumdjieva	2011	Demo: opportunistic mobile social networking.	db/conf/mobisys/mobisys2011.html#PajevicYHKK11
2155629	Qiang_Xu,Alexandre_Gerber,Zhuoqing_Morley_Mao,Jeffrey_Pang	2011	AccuLoc: practical localization of performance measurements in 3G networks.	db/conf/mobisys/mobisys2011.html#XuGMP11
2155632	rgaard,Sourav_Bhattacharya,Henrik_Blunck,Petteri_Nurmi	2011	Energy-efficient trajectory tracking for mobile devices.	db/conf/mobisys/mobisys2011.html#KjaergaardBBN11
2155635	Lorenzo_Keller,Anh_Le,Blerim_Cici,Hulya_Seferoglu,Christina_Fragouli,Athina_Markopoulou	2012	Demo: Microcast: cooperative video streaming on smartphones.	db/conf/mobisys/mobisys2012.html#KellerLCSFM12a
2155637	Tingxin_Yan,David_Chu,Deepak_Ganesan,Aman_Kansal,Jie_Liu	2012	Fast app launching for mobile devices using predictive user context.	db/conf/mobisys/mobisys2012.html#YanCGKL12
2155639	Suman_Nath	2012	ACE: exploiting correlation for energy-efficient and continuous context sensing.	db/conf/mobisys/mobisys2012.html#Nath12
2155641	Mostafa_Izz,Yossuf_Khazbak,Tamer_A._ElBatt,Moustafa_Youssef	2012	Demo: Cellchek: demonstrating a cost-effective cell phone-based patient monitoring and advising system.	db/conf/mobisys/mobisys2012.html#IzzKEY12
2155643	Andre_Kalamandeen,Adin_Scannell,Eyal_de_Lara,Anmol_Sheth,Anthony_LaMarca	2010	Ensemble: cooperative proximity-based authentication.	db/conf/mobisys/mobisys2010.html#KalamandeenSLSL10
2155644	Marinos_Argyrou,Matt_Calder,Arsham_Farshad,Mahesh_K._Marina	2011	Poster: energy consumption impact of UHF RFID reader integration with mobile phones.	db/conf/mobisys/mobisys2011.html#ArgyrouCFM11
2155653	Mian_Dong,Lin_Zhong	2011	Chameleon: a color-adaptive web browser for mobile OLED displays.	db/conf/mobisys/mobisys2011.html#DongZ11
2155658	Zengbin_Zhang,David_Chu,Xiaomeng_Chen,Thomas_Moscibroda	2012	SwordFight: enabling a new class of phone-to-phone action games on commodity phones.	db/conf/mobisys/mobisys2012.html#ZhangCCM12
2155659	Aldo_Cassola,Tao_Jin,Harsh_Kumar,Guevara_Noubir,Kamal_Sharma	2011	Demo: SNEAP: a social network-enabled EAP method no more open hotspots.	db/conf/mobisys/mobisys2011.html#CassolaJKNS11
2155662	Stephen_P._Tarzia,Peter_A._Dinda,Robert_P._Dick,Gokhan_Memik	2011	Indoor localization without infrastructure using the acoustic background spectrum.	db/conf/mobisys/mobisys2011.html#TarziaDDM11
2155667	Jon_Crowcroft	2012	Through a graph, darkly.	db/conf/mobisys/hotplanet2012.html#Crowcroft12
2155681	Mian_Dong,Lin_Zhong	2011	Self-constructive high-rate system energy modeling for battery-powered mobile systems.	db/conf/mobisys/mobisys2011.html#DongZ11a
2155682	Jacob_Sorber,Minho_Shin,Ronald_A._Peterson,David_Kotz	2011	Poster: practical trusted computing for mhealth sensing.	db/conf/mobisys/mobisys2011.html#SorberSPK11
2155688	Justin_Manweiler,Romit_Roy_Choudhury	2011	Avoiding the rush hours: WiFi energy management via traffic isolation.	db/conf/mobisys/mobisys2011.html#ManweilerC11
2155695	Souvik_Sen,Bozidar_Radunovic,Romit_Roy_Choudhury,Tom_Minka	2012	You are facing the Mona Lisa: spot localization using PHY layer information.	db/conf/mobisys/mobisys2012.html#SenRCM12
2155701	Jeongyeup_Paek,Joongheon_Kim,Ramesh_Govindan	2010	Energy-efficient rate-adaptive GPS-based positioning for smartphones.	db/conf/mobisys/mobisys2010.html#PaekKG10
2155702	Zeyu_Liu,Khiem_Lam,Sirote_Chaiwattanapong,Kyunghan_Lee,Injong_Rhee	2012	Demo: VisualComm - new robust channel of file transfer in mobile communications.	db/conf/mobisys/mobisys2012.html#LiuLCLR12
2155704	Jeremy_Gummeson,Shane_S._Clark,Kevin_Fu,Deepak_Ganesan	2010	On the limits of effective hybrid micro-energy harvesting on mobile CRFID sensors.	db/conf/mobisys/mobisys2010.html#GummesonCFG10
2155706	Sarah_Clinch,Thomas_Kubitza,Nigel_Davies,Marc_Langheinrich	2012	Demo: using mobile devices to personalize pervasive displays.	db/conf/mobisys/mobisys2012.html#ClinchKDL12
2155708	Bo_Yan,Guanling_Chen	2011	AppJoy: personalized mobile application discovery.	db/conf/mobisys/mobisys2011.html#YanC11
2155711	William_Knowles,Mu_Mu,Will_Bamford,Nicholas_J._P._Race,Chris_Needham	2012	Demo: introducing NextShare	db/conf/mobisys/mobisys2012.html#KnowlesMBRN12
2155731	David_Cairns,Marwan_Fayed	2012	Poster: towards position-based routing for mobile environments.	db/conf/mobisys/mobisys2012.html#CairnsF12
2155735	Dave_Gullick,Nigel_Davies,Michael_Harding	2012	Demo: an experience sampling toolkit for the transport domain.	db/conf/mobisys/mobisys2012.html#GullickDH12
2155736	Waylon_Brunette,Rita_Sodt,Rohit_Chaudhri,Mayank_Goel,Michael_Falcone,Jaylen_VanOrden,Gaetano_Borriello	2012	Open data kit sensors: a sensor integration framework for android at the application-level.	db/conf/mobisys/mobisys2012.html#BrunetteSCGFVB12
2155739	Norihisa_Segawa,Tomoaki_Yamaguchi,Jun_Sawamoto,Masato_Yazawa,Haruo_Tamaki	2012	Poster: a construction of a long distance communication sensor network node using Arduino and Mad-SS shield.	db/conf/mobisys/mobisys2012.html#SegawaYSYT12
2155740	Michael_Doering	2011	High-resolution large-scale air pollution monitoring: approaches and challenges.	db/conf/mobisys/hotplanet2011.html#Doering11
2155742	Chang-Hung_Hsieh,Yu-Yu_Chen,Chih-Chieh_Yang,Shih-Lung_Chao,Hung-Yu_Wei	2012	Poster: a smart scheduling mechanism for energy saving in android system.	db/conf/mobisys/mobisys2012.html#HsiehCYCW12
2155744	Mian_Dong,Lin_Zhong	2011	Demo: chameleon: a color-adaptive web browser for mobile OLED displays.	db/conf/mobisys/mobisys2011.html#DongZ11c
2155747	Feng_Qian,Zhaoguang_Wang,Alexandre_Gerber,Zhuoqing_Morley_Mao,Subhabrata_Sen,Oliver_Spatscheck	2011	Profiling resource usage for mobile applications: a cross-layer approach.	db/conf/mobisys/mobisys2011.html#QianWGMSS11
2155753	Jong_Hyun_Lim,Andong_Zhan,Andreas_Terzis	2011	Poster: HealthOS: a platform for integrating and developing pervasive healthcare applications.	db/conf/mobisys/mobisys2011.html#LimZT11
2155760	Maribel_Yasmina_Santos,Monica_Wachowicz	2011	Computing performance indicators in detecting shipping collision.	db/conf/mobisys/hotplanet2011.html#SantosW11
2155761	Emiliano_Miluzzo,Alexander_Varshavsky,Suhrid_Balakrishnan,Romit_Roy_Choudhury	2012	Tapprints: your finger taps have fingerprints.	db/conf/mobisys/mobisys2012.html#MiluzzoVBC12
2155777	Youngki_Lee,Younghyun_Ju,Chulhong_Min,Seungwoo_Kang,Inseok_Hwang,Junehwa_Song	2012	Demo: SenseTogether - cooperative ambience monitoring platform with continuity and benefit awareness.	db/conf/mobisys/mobisys2012.html#LeeJMKHS12a
2155782	Hon_Lung_Chu,Vijay_Raman,Jeffrey_Shen,Romit_Roy_Choudhury,Aman_Kansal,Victor_Bahl	2011	Poster: you driving? talk to you later.	db/conf/mobisys/mobisys2011.html#ChuRSCKB11
2155785	Songchun_Fan,Mahanth_Gowda,Romit_Roy_Choudhury	2012	Poster: saving power for mobile phones with partial Wi-Fi scans.	db/conf/mobisys/mobisys2012.html#FanGC12
2155787	Jacob_Sorber,Minho_Shin,Ronald_A._Peterson,David_Kotz	2012	Plug-n-trust: practical trusted sensing for mhealth.	db/conf/mobisys/mobisys2012.html#SorberSPK12
2155788	Moo-Ryong_Ra,Jeongyeup_Paek,Abhishek_B._Sharma,Ramesh_Govindan,Martin_H._Krieger,Michael_J._Neely	2010	Energy-delay tradeoffs in smartphone applications.	db/conf/mobisys/mobisys2010.html#RaPSGKN10
2155792	ÃŸ,Florian_Alt,Albrecht_Schmidt_0001	2012	Demo: mobile interaction with ads on public display networks.	db/conf/mobisys/mobisys2012.html#SchneegassAS12
2155796	Emre_A._Yavuz,Gunnar_Karlsson	2011	Poster: collective mobile sensing for wireless network performance monitoring.	db/conf/mobisys/mobisys2011.html#YavuzK11
2155797	Emiliano_Miluzzo,Cory_Cornelius,Ashwin_Ramaswamy,Tanzeem_Choudhury,Zhigang_Liu,Andrew_T._Campbell	2010	Darwin phones: the evolution of sensing and inference on mobile phones.	db/conf/mobisys/mobisys2010.html#MiluzzoCRCLC10
2155801	Tam_Vu,Ashwin_Ashok,Akash_Baid,Marco_Gruteser,Richard_E._Howard,Janne_Lindqvist,Predrag_Spasojevic,Jeffrey_Walling	2012	Demo: user identification and authentication with capacitive touch communication.	db/conf/mobisys/mobisys2012.html#VuABGHLSW12
2155809	Fahad_R._Dogar,Peter_Steenkiste,Konstantina_Papagiannaki	2010	Catnap: exploiting high bandwidth wireless interfaces to save energy for mobile devices.	db/conf/mobisys/mobisys2010.html#DogarSP10
2155817	Youngil_Kim,Keith_Taylor,Carson_Dunbar,Brenton_D._Walker,Padma_Mundur	2011	Reality vs emulation: running real mobility traces on a mobile wireless testbed.	db/conf/mobisys/hotplanet2011.html#KimTDWM11
2155818	Aruna_Balasubramanian,Ratul_Mahajan,Arun_Venkataramani	2010	Augmenting mobile 3G using WiFi.	db/conf/mobisys/mobisys2010.html#BalasubramanianMV10
2155823	Sandip_Agrawal,Ionut_Constandache,Shravan_Gaonkar,Romit_Roy_Choudhury,Kevin_Caves,Frank_DeRuyter	2011	Using mobile phones to write in air.	db/conf/mobisys/mobisys2011.html#AgrawalCGCCD11
2155825	Lenin_Ravindranath,Tiffany_Yu-Han_Chen,Somak_Das,Raluca_Ifrim,Hari_Balakrishnan,Samuel_Madden	2012	Demo: code in the air - simplifying tasking on smartphones.	db/conf/mobisys/mobisys2012.html#RavindranathCDIBM12
2306794	Maxim_Podlesny,Carey_Williamson	2011	An application-level solution for the TCP-incast problem in data center networks.	db/conf/iwqos/iwqos2011.html#PodlesnyW11
2306795	Dan_Xu,Xin_Liu_0002,Bin_Fan	2011	Minimizing energy cost for Internet-scale datacenters with dynamic traffic.	db/conf/iwqos/iwqos2011.html#XuLF11
2306796	Yao_Zhao,Yinzhi_Cao,Yan_Chen,Ming_Zhang,Anup_Goyal	2011	Rake: Semantics assisted network-based tracing framework.	db/conf/iwqos/iwqos2011.html#ZhaoCCZG11
2306800	Amit_Mondal,Ross_Cutler,Cheng_Huang,Jin_Li_0001,Aleksandar_Kuzmanovic	2010	SureCall: Towards glitch-free real-time audio/video conferencing.	db/conf/iwqos/iwqos2010.html#MondalCHLK10
2306801	Yueping_Zhang,Ao-Jan_Su,Guofei_Jiang	2010	Evaluating the impact of data center network architectures on application performance in virtualized environments.	db/conf/iwqos/iwqos2010.html#ZhangSJ10
2306808	Zvi_Rosberg,Antonio_Cantoni,Ren_Ping_Liu	2010	Resource allocation for QoS multiuser MIMO with zero forcing and MMSE beamforming.	db/conf/iwqos/iwqos2010.html#RosbergCL10
2306810	Hemant_Sengar,Xinyuan_Wang,Arthur_Nichols	2011	Thwarting Spam over Internet Telephony (SPIT) attacks on VoIP networks.	db/conf/iwqos/iwqos2011.html#SengarWN11
2306811	Mingwei_Xu,Qing_Li,Lingtao_Pan,Qi_Li	2011	MPCT: Minimum protection cost tree for IP fast reroute using Tunnel.	db/conf/iwqos/iwqos2011.html#XuLPL11
2306822	Hongkun_Yang,Fengyuan_Ren,Chuang_Lin,Bin_Liu_0004	2010	Energy efficient cooperation in underwater sensor networks.	db/conf/iwqos/iwqos2010.html#YangRL010
2306826	Xiaodong_Wang,Xiaorui_Wang,Guoliang_Xing,Yanjun_Yao	2010	Dynamic duty cycle control for end-to-end delay guarantees in wireless sensor networks.	db/conf/iwqos/iwqos2010.html#WangWXY10
2306831	Bin_Zhang_0016,Jianping_Wu,Qi_Li,Jiahai_Yang	2010	Efficient parallel searching with TCAMs.	db/conf/iwqos/iwqos2010.html#ZhangWLY10
2306833	Sreejith_Rajkumar,Parameswaran_Ramanathan	2011	PriceMyRoute: A competitive pricing strategy for Internet connectivity service providers.	db/conf/iwqos/iwqos2011.html#RajkumarR11
2306835	Zheng_Ruan,Edith_C._H._Ngai,Jiangchuan_Liu	2010	Wireless sensor network deployment in mobile phones assisted environment.	db/conf/iwqos/iwqos2010.html#RuanNL10
2306836	Hao_Chen_0002,Lin_Shi,Jianhua_Sun	2010	VMRPC: A high efficiency and light weight RPC system for virtual machines.	db/conf/iwqos/iwqos2010.html#ChenSS10
2306850	Tong_Yang,Bo_Yuan,Shenjiang_Zhang,Ting_Zhang,Ruian_Duan,Yi_Wang_0004,Bin_Liu_0001	2012	Approaching optimal compression with fast update for large scale routing tables.	db/conf/iwqos/iwqos2012.html#YangYZZDWL12
2306851	Mo_Sha,Gregory_Hackmann,Chenyang_Lu	2011	Multi-channel reliability and spectrum usage in real homes: Empirical studies for home-area sensor networks.	db/conf/iwqos/iwqos2011.html#ShaHL11
2306852	Haiyang_Wang,Ryan_Shea,Feng_Wang,Jiangchuan_Liu	2012	On the impact of virtualization on Dropbox-like cloud file storage/synchronization services.	db/conf/iwqos/iwqos2012.html#WangSWL12
2306855	Duy_Le,Haining_Wang	2010	An effective feedback-driven approach for energy saving in battery powered systems.	db/conf/iwqos/iwqos2010.html#LeW10
2306856	Sriharsha_Gangam,Sonia_Fahmy	2011	Mitigating interference in a network measurement service.	db/conf/iwqos/iwqos2011.html#GangamF11
2306858	Jihoon_Ryoo,Hwangnam_Kim,Samir_R._Das	2012	Geo-fencing: Geographical-fencing based energy-aware proactive framework for mobile devices.	db/conf/iwqos/iwqos2012.html#RyooKD12
2306861	Lingtao_Pan,Mingwei_Xu,Qing_Li,Dan_Jen	2010	Lightweight IP fast reroute with Tunnel-AT.	db/conf/iwqos/iwqos2010.html#PanXLJ10
2306863	Ke_Xu,Haitao_Li,Jiangchuan_Liu,Wei_Zhu,Wenyu_Wang	2010	PPVA: A universal and transparent peer-to-peer accelerator for interactive online video sharing.	db/conf/iwqos/iwqos2010.html#XuLLZW10
2306865	Zhiqiang_Liu,Junqiang_Song,Shaoliang_Peng	2010	MPIActor: A thread-based MPI program accelerator.	db/conf/iwqos/iwqos2010.html#LiuSP10
2306868	Xiaoyuan_Guo,Jiangchuan_Liu	2010	Path diversified retransmission for TCP over wireless mesh networks.	db/conf/iwqos/iwqos2010.html#GuoL10
2306874	Praveen_Raja,Gaurav_Raina	2011	Delay based feedback, transport protocols and small buffers.	db/conf/iwqos/iwqos2011.html#RajaR11
2306882	Shaojie_Tang,Jing_Yuan,Xiang-Yang_Li,Yunhao_Liu,Guihai_Chen,Ming_Gu,Jizhong_Zhao,Guojun_Dai	2010	DAWN: Energy efficient data aggregation in WSN with mobile sinks.	db/conf/iwqos/iwqos2010.html#TangYLLCGZD10
2306894	Yuan_Wu,Prashanth_Hande,Hongseok_Kim,Mung_Chiang,Danny_H._K._Tsang	2010	QoS-revenue tradeoff with time-constrained ISP pricing.	db/conf/iwqos/iwqos2010.html#WuHKCT10
2306895	Jia_Rao,Yudi_Wei,Jiayu_Gong,Cheng-Zhong_Xu	2011	DynaQoS: Model-free self-tuning fuzzy control of virtualized resources for QoS provisioning.	db/conf/iwqos/iwqos2011.html#RaoWGX11
2306904	Ziyi_Zhang,Qiang_Ma,Xin_Wang_0001	2010	Exploiting use of a new performance metric for construction of robust and efficient wireless backbone network.	db/conf/iwqos/iwqos2010.html#ZhangMW10
2306906	Tatsuya_Yamazaki,Takumi_Miyoshi,Masato_Eguchi,Kyoko_Yamori	2012	A service quality coordination model bridging QoS and QoE.	db/conf/iwqos/iwqos2012.html#YamazakiMEY12
2306910	Zhiqiang_Fan,Li_Zhang,Jufang_Shen,Shouxin_Wang,Xiang_Qiu	2010	Research on uncertain weight of web service QoS criterions.	db/conf/iwqos/iwqos2010.html#FanZSWQ10
2306917	Takashi_Isobe,Satoshi_Tsutsumi,Koichiro_Seto,Kenji_Aoshima,Kazutoshi_Kariya	2010	10 Gbps implementation of TLS/SSL accelerator on FPGA.	db/conf/iwqos/iwqos2010.html#IsobeTSAK10
2306920	Yefu_Wang,Robert_Deaver,Xiaorui_Wang	2010	Virtual batching: Request batching for energ conservation in virtualized servers.	db/conf/iwqos/iwqos2010.html#WangDW10
2306923	Hao_Wang_0016,Zuohua_Tian	2010	Intelligent price-based congestion control for communication networks.	db/conf/iwqos/iwqos2010.html#WangT10
2306929	Wan_Tang,Xi-Min_Yang,Xia_Xie,Li-Mei_Peng,Chan-Hyun_Youn,Yang_Cao	2010	Avidity-model based clonal selection algorithm for network intrusion detection.	db/conf/iwqos/iwqos2010.html#TangYXPYC10
2306930	Lukasz_Brewka,Henrik_Wessing,Lars_Dittmann	2010	UPnP QoS and queuing in home networks.	db/conf/iwqos/iwqos2010.html#BrewkaWD10
2306933	Amr_Rizk,Markus_Fidler	2011	Leveraging statistical multiplexing gains in single- and multi-hop networks.	db/conf/iwqos/iwqos2011.html#RizkF11
2306936	Haiyang_Wang,Jiangchuan_Liu,Ke_Xu	2010	Exploring BitTorrent peer distribution via hybrid PlanetLab-Internet measurement.	db/conf/iwqos/iwqos2010.html#WangLX10
2306937	Michael_Bredel,Zdravko_Bozakov,Yuming_Jiang	2010	Analyzing router performance using network calculus with external measurements.	db/conf/iwqos/iwqos2010.html#BredelBJ10
2306942	Jun_Liu_0013	2011	A theoretical framework for developing distributed admissions control over delay-sensitive media flows.	db/conf/iwqos/iwqos2011.html#Liu11
2306943	s,ndes	2010	An automatic performance testing method based on a formal model for communicating systems.	db/conf/iwqos/iwqos2010.html#ErosC10
2306944	Somsubhra_Sharangi,Ramesh_Krishnamurti,Mohamed_Hefeeda	2010	Streaming scalable video over WiMAX networks.	db/conf/iwqos/iwqos2010.html#SharangiKH10
2306949	Zhenhua_Li,Tieying_Zhang,Yan_Huang,Zhi-Li_Zhang,Yafei_Dai	2012	Maximizing the bandwidth multiplier effect for hybrid cloud-P2P content distribution.	db/conf/iwqos/iwqos2012.html#LiZHZD12
2306963	Shaojie_Tang,XuFei_Mao,Xiang-Yang_Li,Guojun_Dai	2011	Evaluating coverage quality through best covered pathes in wireless sensor networks.	db/conf/iwqos/iwqos2011.html#TangMLD11
2306975	Jiaqing_Luo,Bin_Xiao,Zirong_Yang,Shijie_Zhou	2010	A clone of social networks to decentralized bootstrapping P2P networks.	db/conf/iwqos/iwqos2010.html#LuoXYZ10
2306976	Eugene_S._Myakotnykh,Bjarne_E._Helvik,Otto_Wittner,Olav_Kvittem,re_Hellan,Trond_Skjesol,Ã¸	2010	Measurement and analysis of end-to-end dependability characteristics in the global network.	db/conf/iwqos/iwqos2010.html#MyakotnykhHWKHSO10
2306982	Palden_Lama,Xiaobo_Zhou	2011	PERFUME: Power and performance guarantee with fuzzy MIMO control in virtualized servers.	db/conf/iwqos/iwqos2011.html#LamaZ11
2306984	Yue_Wang,Tianmei_Wang	2011	Applying stochastic network calculus to 802.11 backlog and delay analysis.	db/conf/iwqos/iwqos2011.html#WangW11
2306986	Lei_Shu,Zhuxiu_Yuan,Takahiro_Hara,Lei_Wang_0005,Yan_Zhang_0002	2010	Impacts of duty-cycle on TPGF geographical multipath routing in wireless sensor networks.	db/conf/iwqos/iwqos2010.html#ShuYHWZ10
2306987	Pei_Huang,Chin-Jung_Liu,Li_Xiao,Jin_Chen	2012	Mining frequent partial periodic patterns in spectrum usage data.	db/conf/iwqos/iwqos2012.html#HuangLXC12
2306990	Jing_Zhu	2011	On traffic characteristics and user experience of Skype video call.	db/conf/iwqos/iwqos2011.html#Zhu11
2306995	Jun_Huang,Yoshiaki_Tanaka	2011	QoS routing algorithms using fully polynomial time approximation scheme.	db/conf/iwqos/iwqos2011.html#HuangT11
2306998	Kui_Wu,Yuming_Jiang,Jie_Li	2010	On the model transform in stochastic network calculus.	db/conf/iwqos/iwqos2010.html#WuJL10
2307000	Wei_Yin,Konstanty_Bialkowski,Jadwiga_Indulska,Peizhao_Hu	2010	Evaluations of MadWifi MAC layer rate control mechanisms.	db/conf/iwqos/iwqos2010.html#YinBIH10
2307003	Shining_Wu,Yang_Chen,Xiaoming_Fu_0001,Jun_Li	2012	NCShield: Securing decentralized, matrix factorization-based network coordinate systems.	db/conf/iwqos/iwqos2012.html#WuCFL12
2307008	Abdallah_Jarray,Ahmed_Karmouch	2012	Periodical auctioning for QoS aware virtual network embedding.	db/conf/iwqos/iwqos2012.html#JarrayK12
2307021	Rafael_Huysegems,Bart_De_Vleeschauwer,Koen_De_Schepper,Chris_Hawinkel,Tingyao_Wu,Koenraad_Laevens,Werner_Van_Leekwijck	2012	Session reconstruction for HTTP adaptive streaming: Laying the foundation for network-based QoE monitoring.	db/conf/iwqos/iwqos2012.html#HuysegemsVSHWLL12
2307044	Juan_Du,Xiaohui_Gu,Nidhi_Shah	2011	Adaptive data-driven service integrity attestation for multi-tenant cloud systems.	db/conf/iwqos/iwqos2011.html#DuGS11
2307046	Jiayu_Gong,Cheng-Zhong_Xu	2010	vPnP: Automated coordination of power and performance in virtualized datacenters.	db/conf/iwqos/iwqos2010.html#GongX10
2307048	Younchan_Jung,Al_Ann_Ibanez	2011	Charging ratio model for quality-based VoIP charging mechanism.	db/conf/iwqos/iwqos2011.html#JungI11
2307050	Emanuel_Heidinger,Nils_Kammenhuber,Alexander_Klein,Georg_Carle	2012	Network Calculus and mixed-integer LP applied to a switched aircraft cabin network.	db/conf/iwqos/iwqos2012.html#HeidingerKKC12
2307066	Yi_Liu,Rong_Yu,Yan_Zhang_0002,Shengli_Xie	2010	A group-based cooperative medium access control protocol for cognitive radio networks.	db/conf/iwqos/iwqos2010.html#LiuYZX10
2307074	Hanhua_Chen,Hai_Jin,Lingchao_Guo,Shaoliang_Wu,Tao_Gu	2012	Audio-on-demand over wireless sensor networks.	db/conf/iwqos/iwqos2012.html#ChenJGWG12
2307075	James_Gross	2012	Scheduling with outdated CSI: Effective service capacities of optimistic vs. pessimistic policies.	db/conf/iwqos/iwqos2012.html#Gross12
2307080	Lidong_Yu,Chang-you_Xing,Huali_Bai,Ming_Chen_0003,Mingwei_Xu	2011	Detecting shared congestion paths based on PCA.	db/conf/iwqos/iwqos2011.html#YuXBCX11
2307088	Hanwu_Wang,Weijia_Jia	2010	Effective traffic control in IEEE 802.16j WiMAX networks.	db/conf/iwqos/iwqos2010.html#WangJ10
2307092	Chengbo_Dong,Guodong_Wang,Yang_Chen,Beixing_Deng,Xing_Li	2010	Handling triangle inequality violations in Euclidean distance based network coordinate systems.	db/conf/iwqos/iwqos2010.html#DongWCDL10
2307099	Nikos_Zotos,Georgios_Xilouris,Anastasios_Kourtis,Daniele_Renzi,Beilu_Shao	2011	Performance evaluation of H264/SVC streaming system featuring real-time in-network adaptation.	db/conf/iwqos/iwqos2011.html#ZotosXKRS11
2307101	Tianyin_Xu,Baoliu_Ye,Qinhui_Wang,Wenzhong_Li,Sanglu_Lu,Xiaoming_Fu_0001	2010	APEX: A personalization framework to improve quality of experience for DVD-like functions in P2P VoD applications.	db/conf/iwqos/iwqos2010.html#XuYWLLF10
2307102	Haitao_Li,Jiangchuan_Liu,Ke_Xu,Song_Wen	2012	Understanding video propagation in online social networks.	db/conf/iwqos/iwqos2012.html#LiLXW12
2307104	Abhijit_Bhattacharya,Anurag_Kumar_0001	2010	Delay constrained optimal relay placement for planned wireless sensor networks.	db/conf/iwqos/iwqos2010.html#BhattacharyaK10
2307118	Shaojie_Tang,Xiang-Yang_Li,Jing_Yuan,Cheng_Wang,Guihai_Chen,Changjun_Jiang	2010	DREAM: On the reaction delay in large scale wireless networks with mobile sensors.	db/conf/iwqos/iwqos2010.html#TangLYWCJ10
2307120	Tom_H._Luan,Xuemin_Shen,Danny_H._K._Tsang	2010	BitTorrent under a microscope: Towards static QoS provision in dynamic peer-to-peer networks.	db/conf/iwqos/iwqos2010.html#LuanST10
2307123	Eric_Lin,Daniel_Medeiros_Nunes_de_Castro,Mea_Wang,John_Aycock	2010	SPoIM: A close look at pollution attacks in P2P live streaming.	db/conf/iwqos/iwqos2010.html#LinCWA10
2307125	Gomathi_Ramachandran,Len_Ciavattone,Al_Morton	2011	Restoration measurements on an IP/MPLS backbone: The effect of Fast Reroute on link failure.	db/conf/iwqos/iwqos2011.html#RamachandranCM11
2307126	Lizhi_Peng,Hongli_Zhang,Bo_Yang_0001,Yuehui_Chen,Mahmoud_T._Qassrawi,Gang_Lu	2010	Traffic identification using flexible neural trees.	db/conf/iwqos/iwqos2010.html#PengZYCQL10
2307128	Shan-Hsiang_Shen,Aditya_Akella	2012	DECOR: A distributed coordinated resource monitoring system.	db/conf/iwqos/iwqos2012.html#ShenA12
2307131	Hao_Wang_0006,Bill_Lin	2011	Designing efficient codes for synchronization error channels.	db/conf/iwqos/iwqos2011.html#WangL11
2307134	Zhen_Ma,Ke_Xu,Yifeng_Zhong	2012	Exploring the policy selection of P2P VoD system - A simulation based research.	db/conf/iwqos/iwqos2012.html#MaXZ12
2307138	Vijay_Gabale,Partha_Dutta,Ravi_Kokku,Shivkumar_Kalyanaraman	2012	InSite: QoE-aware video delivery from cloud data centers.	db/conf/iwqos/iwqos2012.html#GabaleDKK12
2307139	Gahyun_Park,Minseok_Kwon	2010	Distributed tries for load balancing in peer-to-peer systems.	db/conf/iwqos/iwqos2010.html#ParkK10
2307142	Ritesh_Kumar_Kalle,UmaMaheswari_C._Devi,Shivkumar_Kalyanaraman	2011	Multi-tiered, burstiness-aware bandwidth estimation and scheduling for VBR video flows.	db/conf/iwqos/iwqos2011.html#KalleDK11
2307147	Ted_H._Szymanski	2011	Future Internet video multicasting with essentially perfect resource utilization and QoS guarantees.	db/conf/iwqos/iwqos2011.html#SzymanskiC11
2307151	Xiaojun_Feng,Jin_Zhang,Qian_Zhang	2011	Trajectory-assisted Delay-Bounded routing with moving receivers in Vehicular Ad-hoc Networks.	db/conf/iwqos/iwqos2011.html#FengZZ11
2307152	Songling_Fu,Xiangke_Liao,Lianyue_He,Chenlin_Huang,Xiaodong_Tang,Si_Zheng	2010	Efficient and fine-grained sharing of encrypted files.	db/conf/iwqos/iwqos2010.html#FuLHHTZ10
2307153	Yuanyuan_Zeng,Guanhua_Yan,Stephan_Eidenbenz,Kang_G._Shin	2011	Measuring the effectiveness of infrastructure-level detection of large-scale botnets.	db/conf/iwqos/iwqos2011.html#ZengYES11
2307156	Qing_Li,Mingwei_Xu,Meng_Chen	2012	aggregation.	db/conf/iwqos/iwqos2012.html#LiXC12
2307165	Shiping_Li,Jin_Zhao,Xin_Wang_0002	2012	Elite: Differentiating the playback lag for peer-assisted live video streaming.	db/conf/iwqos/iwqos2012.html#LiZW12
2307168	Zdravko_Bozakov	2011	Architecture and algorithms for virtual routers as a service.	db/conf/iwqos/iwqos2011.html#Bozakov11
2307173	Maxim_Podlesny,Sergey_Gorinsky,Balaji_Rengarajan	2012	AIST: Insights into queuing and loss on highly multiplexed links.	db/conf/iwqos/iwqos2012.html#PodlesnyGR12
2307183	Min_Ding,Vishal_K._Singh,Yueping_Zhang,Guofei_Jiang	2012	Application dependency discovery using matrix factorization.	db/conf/iwqos/iwqos2012.html#DingSZJ12
2307190	Yongmin_Tan,Xiaohui_Gu,Vinay_Venkatesh	2011	OLIC: OnLine Information Compression for scalable hosting infrastructure monitoring.	db/conf/iwqos/iwqos2011.html#TanGV11
2307202	Yipeng_Zhou,Tom_Z._J._Fu,Dah_Ming_Chiu	2012	Division-of-labor between server and P2P for streaming VoD.	db/conf/iwqos/iwqos2012.html#ZhouFC12
2307203	Libin_Yang,Wei_Lou	2012	Pricing, competition and innovation: A profitable business model to resolve the tussle involved in peer-to-peer streaming applications.	db/conf/iwqos/iwqos2012.html#YangL12
2307209	Seong-ryong_Kang,Dmitri_Loguinov	2010	Characterizing tight-link bandwidth of multi-hop paths using probing response curves.	db/conf/iwqos/iwqos2010.html#KangL10
2307210	Marco_Abundo,Valeria_Cardellini,Francesco_Lo_Presti	2011	An MDP-based admission control for a QoS-aware service-oriented system.	db/conf/iwqos/iwqos2011.html#AbundoCP11
2307218	Min_Chen,Runhe_Huang,Yan_Zhang,Han-Chieh_Chao	2010	A smart RFID system.	db/conf/iwqos/iwqos2010.html#ChenHZC10
2307220	Zhenyu_Li,Rong_Gu,Gaogang_Xie	2011	Measuring and enhancing the social connectivity of UGC video systems: A case study of YouKu.	db/conf/iwqos/iwqos2011.html#LiGX11
2307228	Zhi_Wang,Chuan_Wu,Lifeng_Sun,Shiqiang_Yang	2011	Peer-assisted online games with social reciprocity.	db/conf/iwqos/iwqos2011.html#WangWSY11
2307230	Dan_Wang,Jiangchuan_Liu,Jianliang_Xu	2010	Data sweeper: A proactive filtering framework for error-bounded sensor data collection.	db/conf/iwqos/iwqos2010.html#WangLX10a
2307232	Nissan_Lev-Tov,Niklas_Carlsson,Zongpeng_Li,Carey_Williamson,Song_Zhang_0003	2010	Dynamic file-selection policies for bundling in BitTorrent-like systems.	db/conf/iwqos/iwqos2010.html#Lev-TovCLWZ10
2307233	Haiyang_Wang,Feng_Wang,Jiangchuan_Liu	2011	On long-term social relationships in peer-to-peer systems.	db/conf/iwqos/iwqos2011.html#WangWL11
2307252	UmaMaheswari_Devi,Ramana_Polavarapu,Malolan_Chetlur,Shivkumar_Kalyanaraman	2012	On the partial caching of streaming video.	db/conf/iwqos/iwqos2012.html#DeviPCK12
2307253	Pei_Huang,Chen_Wang,Li_Xiao,Hongyang_Chen	2010	RC-MAC: A receiver-centric medium access control protocol for wireless sensor networks.	db/conf/iwqos/iwqos2010.html#HuangWXC10
2307258	Feng_Wang,Jiangchuan_Liu,Dan_Wang	2011	Utilizing elevator for wireless sensor data collection in high-rise structure monitoring.	db/conf/iwqos/iwqos2011.html#WangLW11
2307265	Alexander_Shpiner,Isaac_Keslassy	2010	A switch-based approach to throughput collapse and starvation in data centers.	db/conf/iwqos/iwqos2010.html#ShpinerK10
2307277	Ercan_Ucan,Timothy_Roscoe	2011	Dexferizer: A service for data transfer optimization.	db/conf/iwqos/iwqos2011.html#UcanR11
2307278	Dahai_Li,David_Levy	2010	Engineering an autonomous fuzzy controller for QoS control in distributed services.	db/conf/iwqos/iwqos2010.html#LiL10
2307282	Libin_Yang,Wei_Lou	2012	A contract-ruled economic model for QoS guarantee in mobile peer-to-peer streaming services.	db/conf/iwqos/iwqos2012.html#YangL12a
2307283	Xing_Xu,Ji_Luo,Qian_Zhang	2010	Tolerable interference in multi-channel sensor networks: A measurement study.	db/conf/iwqos/iwqos2010.html#XuLZ10
2307284	Ying-Hsin_Liang,Ben-Jye_Chang,Yan-Min_Lin	2011	Solve tree setup-break problem and minimize control overhead in delay-bounded distributed wireless multicast QoS routing.	db/conf/iwqos/iwqos2011.html#LiangCL11
2307286	Dimitris_Giatsios,Iordanis_Koutsopoulos,Thanasis_Korakis	2012	Dishonest reporting in queue-based cross-layer network optimization.	db/conf/iwqos/iwqos2012.html#GiatsiosKK12
2307288	Adrian_Sai-Wah_Tam,Kang_Xi,Yang_Xu,H._Jonathan_Chao	2012	Preventing TCP incast throughput collapse at the initiation, continuation, and termination.	db/conf/iwqos/iwqos2012.html#TamXXC12
2307291	Shohei_Kodama,Masayoshi_Shimamura,Katsuyoshi_Iida	2011	Initial CWND determination method for fast startup TCP algorithms.	db/conf/iwqos/iwqos2011.html#KodamaSI11
2307295	Chowdhury_Sayeed_Hyder,Li_Xiao	2011	Distributed learning approach for channel selection in Cognitive Radio Networks.	db/conf/iwqos/iwqos2011.html#HyderX11
2307301	Jinho_Hwang,Timothy_Wood	2012	Adaptive dynamic priority scheduling for virtual desktop infrastructures.	db/conf/iwqos/iwqos2012.html#HwangW12
2307303	Srikumar_Venugopal,Han_Li,Pradeep_Kumar_Ray	2011	Auto-scaling emergency call centres using cloud resources to handle disasters.	db/conf/iwqos/iwqos2011.html#VenugopalLR11
2307304	Chengdi_Lai,Ka-Cheong_Leung,Victor_O._K._Li	2012	Enhancing AQM to combat wireless losses.	db/conf/iwqos/iwqos2012.html#LaiLL12
2307307	Xiaowei_Chen,Xiaowen_Chu,Yixin_Jiang,Fengyuan_Ren	2010	Measurements, analysis and modeling of private tracker sites.	db/conf/iwqos/iwqos2010.html#ChenCJR10
2307308	Kai_Bu,Xuan_Liu,Bin_Xiao	2012	Fast cloned-tag identification protocols for large-scale RFID systems.	db/conf/iwqos/iwqos2012.html#BuLX12
2307320	Jie_Gong,Sheng_Zhou,Zhisheng_Niu,Peng_Yang	2010	Traffic-aware base station sleeping in dense cellular networks.	db/conf/iwqos/iwqos2010.html#GongZNY10
2307322	Cong_Ding,Yang_Chen,Tianyin_Xu,Xiaoming_Fu_0001	2012	CloudGPS: A scalable and ISP-friendly server selection scheme in cloud computing environments.	db/conf/iwqos/iwqos2012.html#DingCXF12
2307331	Zhenyu_Wu,Yueping_Zhang,Vishal_K._Singh,Guofei_Jiang,Haining_Wang	2012	NetDEO: Automating network design, evolution, and optimization.	db/conf/iwqos/iwqos2012.html#WuZSJW12
2307334	Wei_Chen,Yue_Wang,Minghua_Chen,Soung_Chang_Liew	2011	On the performance of TCP over throughput-optimal CSMA.	db/conf/iwqos/iwqos2011.html#ChenWCL11
2307338	Mengwei_Lu,Patrick_P._C._Lee,John_C._S._Lui	2011	Identity attack and anonymity protection for P2P-VoD systems.	db/conf/iwqos/iwqos2011.html#LuLL11
2307346	Shanshan_Li,Si_Zheng,Xiangke_Liao,Shaoliang_Peng	2010	Exploring the practicability of mobile sensors in complex environment surveillance.	db/conf/iwqos/iwqos2010.html#LiZLP10
2307353	Shaoliang_Peng,Guoliang_Xing,Shanshan_Li,Weijia_Jia,Yuxing_Peng	2010	Fish a lake: Fast release/capture sampling in large-scale sensor networks.	db/conf/iwqos/iwqos2010.html#PengXLJP10
2307355	Elisangela_Aguiar,Andre_Riker,m,Eduardo_Cerqueira,Mu_Mu	2012	Video quality estimator for wireless mesh networks.	db/conf/iwqos/iwqos2012.html#AguiarRACM12
2307358	Taghrid_Samak,Adel_El-Atawy,Ehab_Al-Shaer	2011	QoS policy verification for DiffServ networks.	db/conf/iwqos/iwqos2011.html#SamakEA11
2307363	Lei_Gao,Jiahai_Yang,Jessie_Hui_Wang,Hui_Zhang	2010	A measure of growth of user community in OSNs.	db/conf/iwqos/iwqos2010.html#GaoYWZ10
2307365	Maxim_Podlesny,Carey_Williamson	2010	Providing fairness between TCP NewReno and TCP Vegas with RD network services.	db/conf/iwqos/iwqos2010.html#PodlesnyW10
2307367	Congfeng_Jiang,Xianghua_Xu,Jian_Wan,Jilin_Zhang,Xindong_You,Ritai_Yu	2010	Power aware job scheduling with QoS guarantees based on feedback control.	db/conf/iwqos/iwqos2010.html#JiangXWZYY10
2307369	Roland_Bless,hricht	2011	Advanced Quality-of-Service signaling for IP multicast.	db/conf/iwqos/iwqos2011.html#BlessR11
2307371	Fajun_Chen,Jiangchuan_Liu,Zongpeng_Li,Yijie_Wang	2010	Routing with uncertainty in wireless mesh networks.	db/conf/iwqos/iwqos2010.html#ChenLLW10
2307373	Ryan_Shea,Jiangchuan_Liu	2012	Understanding the impact of Denial of Service attacks on Virtual Machines.	db/conf/iwqos/iwqos2012.html#SheaL12
2307375	Mikael_Fallgren	2010	On the complexity of maximizing the minimum Shannon capacity in Wireless Networks by joint channel assignment and power allocation.	db/conf/iwqos/iwqos2010.html#Fallgren10
2307376	Kunyang_Peng,Qunfeng_Dong,Min_Chen	2011	TCAM-based DFA deflation: A novel approach to fast and scalable regular expression matching.	db/conf/iwqos/iwqos2011.html#PengDC11
2307378	Amr_Rizk,Markus_Fidler	2010	Statistical end-to-end performance bounds for networks under long memory FBM cross traffic.	db/conf/iwqos/iwqos2010.html#RizkF10
2307391	Akihito_Hiromori,Hirozumi_Yamaguchi,Teruo_Higashino	2012	Simulating CSMA/CA behavior for performance evaluation of multi-hop wireless networks.	db/conf/iwqos/iwqos2012.html#HiromoriYH12
2307399	Shubhadip_Mitra,UmaMaheswari_Devi,Parul_Gupta,Malolan_Chetlur,Shivkumar_Kalyanaraman	2010	Macro-scheduling of base stations for video-on-demand flows in WiMAX networks.	db/conf/iwqos/iwqos2010.html#MitraDGCK10
2307400	Bin_Liu_0001,Bo_Yuan,Huichen_Dai,Hongbo_Zhao,Jia_Yu,Laxmi_N._Bhuyan	2012	Improving the throughput and delay performance of network processors by applying push model.	db/conf/iwqos/iwqos2012.html#0001YDZYB12
2330449	Hyunseok_Chang,Murali_S._Kodialam,T._V._Lakshman,Sarit_Mukherjee,Limin_Wang	2012	Building Access Oblivious Storage Cloud for Enterprise.	db/conf/nsdi/hotice2012.html#ChangKLMW12
2330451	Vivek_Shrivastava,Shravan_K._Rayanchu,Suman_Banerjee,Konstantina_Papagiannaki	2011	PIE in the Sky: Online Passive Interference Estimation for Enterprise WLANs.	db/conf/nsdi/nsdi2011.html#ShrivastavaRBP10
2330453	Zhichun_Li,Ming_Zhang,Zhaosheng_Zhu,Yan_Chen,Albert_G._Greenberg,Yi-Min_Wang	2010	WebProphet: Automating Performance Prediction for Web Services.	db/conf/nsdi/nsdi2010.html#LiZZCGW10
2330457	Marcel_Dischinger,Massimiliano_Marcon,Saikat_Guha,P._Krishna_Gummadi,Ratul_Mahajan,Stefan_Saroiu	2010	Glasnost: Enabling End Users to Detect Traffic Differentiation.	db/conf/nsdi/nsdi2010.html#DischingerMGGMS10
2330464	William_J._Bolosky,Dexter_Bradshaw,Randolph_B._Haagens,Norbert_P._Kusters,Peng_Li	2011	Paxos Replicated State Machines as the Basis of a High-Performance Data Store.	db/conf/nsdi/nsdi2011.html#BoloskyBHKL10
2330465	HariGovind_V._Ramasamy,Cheng-Lin_Tsao,Birgit_Pfitzmann,Nikolai_Joukov,James_W._Murray	2011	Towards Automated Identification of Security Zone Classification in Enterprise Networks.	db/conf/nsdi/hotice2011.html#RamasamyTPJM11
2330467	Sharad_Agarwal,John_Dunagan,Navendu_Jain,Stefan_Saroiu,Alec_Wolman	2010	Volley: Automated Data Placement for Geo-Distributed Cloud Services.	db/conf/nsdi/nsdi2010.html#AgarwalDJSW10
2330472	James_W._Mickens,Jeremy_Elson,Jon_Howell	2010	Mugshot: Deterministic Capture and Replay for JavaScript Applications.	db/conf/nsdi/nsdi2010.html#MickensEH10
2330473	Alan_Shieh,Srikanth_Kandula,Albert_G._Greenberg,Changhoon_Kim,Bikas_Saha	2011	Sharing the Data Center Network.	db/conf/nsdi/nsdi2011.html#ShiehKGKS10
2330478	Rodrigo_Fonseca,Michael_J._Freedman,George_Porter	2010	Experiences with Tracing Causality in Networked Services.	db/conf/nsdi/inm-wren2010.html#FonsecaFP08
2330481	Siddhartha_Sen,Jacob_R._Lorch,Richard_Hughes,Carlos_Garcia_Jurado_Suarez,Brian_Zill,Weverton_Cordeiro,Jitendra_Padhye	2012	Don't Lose Sleep Over Availability: The GreenUp Decentralized Wakeup Service.	db/conf/nsdi/nsdi2012.html#SenLHSZCP12
2330487	Vyas_Sekar,Norbert_Egi,Sylvia_Ratnasamy,Michael_K._Reiter,Guangyu_Shi	2012	Design and Implementation of a Consolidated Middlebox Architecture.	db/conf/nsdi/nsdi2012.html#SekarERRS12
2330491	Lavanya_Jose,Minlan_Yu	2011	Online Measurement of Large Traffic Aggregates on Commodity Switches.	db/conf/nsdi/hotice2011.html#JoseY11
2330499	Atul_Adya,John_Dunagan,Alec_Wolman	2010	Centrifuge: Integrated Lease Management and Partitioning for Cloud Services.	db/conf/nsdi/nsdi2010.html#AdyaDW10
2330500	Guohan_Lu,Chuanxiong_Guo,Yulong_Li,Zhiqiang_Zhou,Tong_Yuan,Haitao_Wu,Yongqiang_Xiong,Rui_Gao,Yongguang_Zhang	2011	ServerSwitch: A Programmable and High Performance Platform for Data Center Networks.	db/conf/nsdi/nsdi2011.html#LuGLZYWXGZ10
2330501	Shravan_K._Rayanchu,Ashish_Patro,Suman_Banerjee	2012	Catching Whales and Minnows Using WiFiNet: Deconstructing Non-WiFi Interference Using WiFi Hardware.	db/conf/nsdi/nsdi2012.html#RayanchuPB12
2330503	Rachid_Guerraoui,Maysam_Yabandeh	2011	Model Checking a Networked System Without the Network.	db/conf/nsdi/nsdi2011.html#GuerraouiY10
2330512	Lei_Yang_0020,Wei_Hou,Lili_Cao,Ben_Y._Zhao,Haitao_Zheng	2010	Supporting Demanding Wireless Applications with Frequency-agile Radios.	db/conf/nsdi/nsdi2010.html#YangHCZZ10
2330513	Parmjeet_Singh,Myungjin_Lee,Sagar_Kumar,Ramana_Rao_Kompella	2011	Enabling Flow-level Latency Measurements across Routers in Data Centers.	db/conf/nsdi/hotice2011.html#SinghLKK11
2330523	rtner,Florian_Schmidt,Hendrik_vom_Lehn,Tobias_Heer,Klaus_Wehrle	2011	SliceTime: A Platform for Scalable and Accurate Network Emulation.	db/conf/nsdi/nsdi2011.html#WeingartnerSLHW10
2330526	Jiaxing_Zhang,Hucheng_Zhou,Rishan_Chen,Xuepeng_Fan,Zhenyu_Guo,Haoxiang_Lin,Jack_Y._Li,Wei_Lin,Jingren_Zhou,Lidong_Zhou	2012	Optimizing Data Shuffling in Data-Parallel Computation by Understanding User-Defined Functions.	db/conf/nsdi/nsdi2012.html#ZhangZCFGLLLZZ12
2330533	Ruichuan_Chen,Alexey_Reznichenko,Paul_Francis,Johannes_Gehrke	2012	Towards Statistical Queries over Distributed Private User Data.	db/conf/nsdi/nsdi2012.html#ChenRFG12
2330537	Eric_Keller,Jennifer_Rexford	2010	The "Platform as a Service" Model for Networking.	db/conf/nsdi/inm-wren2010.html#KellerR08
2330541	Brandon_Heller,Srinivasan_Seetharaman,Priya_Mahadevan,Yiannis_Yiakoumis,Puneet_Sharma,Sujata_Banerjee,Nick_McKeown	2010	ElasticTree: Saving Energy in Data Center Networks.	db/conf/nsdi/nsdi2010.html#HellerSMYSBM10
2330542	Yong_Wang,Daniel_Burgener,Marcel_Flores,Aleksandar_Kuzmanovic,Cheng_Huang	2011	Towards Street-Level Client-Independent IP Geolocation.	db/conf/nsdi/nsdi2011.html#WangBFKH10
2330543	Rakesh_K._Sinha,Kadangode_K._Ramakrishnan,Robert_D._Doverspike,Dahai_Xu,Jorge_Pastor,Aman_Shaikh,Seungjoon_Lee,Chris_Chase	2010	Proactive Network Management of IPTV Networks.	db/conf/nsdi/inm-wren2010.html#SinhaRDXPSLC08
2330545	Costin_Raiciu,Christoph_Paasch,Ã©,Alan_Ford,Michio_Honda,Fabien_Duchene,Olivier_Bonaventure,Mark_Handley	2012	How Hard Can It Be? Designing and Implementing a Deployable Multipath TCP.	db/conf/nsdi/nsdi2012.html#RaiciuPBFHDBH12
2330547	Raja_R._Sambasivan,Alice_X._Zheng,Michael_De_Rosa,Elie_Krevat,Spencer_Whitman,Michael_Stroucken,William_Wang,Lianghong_Xu,Gregory_R._Ganger	2011	Diagnosing Performance Changes by Comparing Request Flows.	db/conf/nsdi/nsdi2011.html#SambasivanZRKWSWXG10
2330559	Bo_Han,Aaron_Schulman,Francesco_Gringoli,Neil_Spring,Bobby_Bhattacharjee,Lorenzo_Nava,Lusheng_Ji,Seungjoon_Lee,Robert_R._Miller	2010	Maranello: Practical Partial Packet Recovery for 802.11.	db/conf/nsdi/nsdi2010.html#HanSGSBNJLM10
2330568	Paolo_Costa,Austin_Donnelly,Antony_I._T._Rowstron,Greg_O'Shea	2012	Camdoop: Exploiting In-network Aggregation for Big Data Applications.	db/conf/nsdi/nsdi2012.html#CostaDRO12
2330569	Roberto_Perdisci,Wenke_Lee,Nick_Feamster	2010	Behavioral Clustering of HTTP-Based Malware and Signature Generation Using Malicious Network Traces.	db/conf/nsdi/nsdi2010.html#PerdisciLF10
2330571	Kevin_C._Webb,Alex_C._Snoeren,Kenneth_Yocum	2011	Topology Switching for Data Center Networks.	db/conf/nsdi/hotice2011.html#WebbSY11
2330572	Qi_Zhang,rses,Raouf_Boutaba,Jin_Xiao	2011	Dynamic Resource Allocation for Spot Markets in Clouds.	db/conf/nsdi/hotice2011.html#ZhangGBX11
2330573	Calvin_C._Newport	2011	Improving Wireless Network Performance Using Sensor Hints.	db/conf/nsdi/nsdi2011.html#Newport10
2330576	Tyson_Condie,Neil_Conway,Peter_Alvaro,Joseph_M._Hellerstein,Khaled_Elmeleegy,Russell_Sears	2010	MapReduce Online.	db/conf/nsdi/nsdi2010.html#CondieCAHES10
2330578	Jeffrey_R._Ballard,Ian_Rae,Aditya_Akella	2010	Extensible and Scalable Network Monitoring Using OpenSAFE.	db/conf/nsdi/inm-wren2010.html#BallardR08
2330585	Mahesh_Balakrishnan,Dahlia_Malkhi,Vijayan_Prabhakaran,Ted_Wobber,Michael_Wei,John_D._Davis	2012	CORFU: A Shared Log Design for Flash Clusters.	db/conf/nsdi/nsdi2012.html#BalakrishnanMPWWD12
2330586	Ang_Li,Xin_Liu,Xiaowei_Yang	2011	Bootstrapping Accountability in the Internet We Have.	db/conf/nsdi/nsdi2011.html#LiLY10
2330595	Gabriel_A._Weaver,Nicholas_J._Foti,Sergey_Bratus,Daniel_N._Rockmore,Sean_W._Smith	2011	Using Hierarchical Change Mining to Manage Network Security Policy Evolution.	db/conf/nsdi/hotice2011.html#WeaverFBRS11
2330596	Soumitra_Sarkar,Ruchi_Mahindru,Rafah_Hosn,Norbert_G._Vogl,HariGovind_V._Ramasamy	2011	Automated Incident Management for a Platform-as-a-Service Cloud.	db/conf/nsdi/hotice2011.html#SarkarMHVR11
2330597	Minlan_Yu,Albert_G._Greenberg,David_A._Maltz,Jennifer_Rexford,Lihua_Yuan,Srikanth_Kandula,Changhoon_Kim	2011	Profiling Network Performance for Multi-tier Data Center Applications.	db/conf/nsdi/nsdi2011.html#YuGMRYKK10
2330602	Michael_J._Freedman	2010	Experiences with CoralCDN: A Five-Year Operational View.	db/conf/nsdi/nsdi2010.html#Freedman10
2330604	Michael_Piatek,Arvind_Krishnamurthy,Arun_Venkataramani,Yang_Richard_Yang,David_Zhang,Alexander_Jaffe	2010	Contracts: Practical Contribution Incentives for P2P Live Streaming.	db/conf/nsdi/nsdi2010.html#PiatekKVYZJ10
2330605	m,David_Shue,Prem_Gopalan,Robert_Kiefer,Matvey_Arye,Steven_Ko,Jennifer_Rexford,Michael_J._Freedman	2012	Serval: An End-Host Stack for Service-Centric Networking.	db/conf/nsdi/nsdi2012.html#NordstromSGKAKRF12
2330612	Mohammad_Alizadeh,Abdul_Kabbani,Tom_Edsall,Balaji_Prabhakar,Amin_Vahdat,Masato_Yasuda	2012	Less Is More: Trading a Little Bandwidth for Ultra-Low Latency in the Data Center.	db/conf/nsdi/nsdi2012.html#AlizadehKEPVY12
2330614	Ankit_Singla,Atul_Singh,Yan_Chen	2012	OSA: An Optical Switching Architecture for Data Center Networks with Unprecedented Flexibility.	db/conf/nsdi/nsdi2012.html#SinglaSC12
2330615	Amin_Tootoonchian,Sergey_Gorbunov,Yashar_Ganjali,n_Casado,Rob_Sherwood	2012	On Controller Performance in Software-Defined Networks.	db/conf/nsdi/hotice2012.html#TootoonchianGGCS12
2330622	Ansley_Post,Vijit_Shah,Alan_Mislove	2011	Bazaar: Strengthening User Reputations in Online Marketplaces.	db/conf/nsdi/nsdi2011.html#PostSM10
2330627	Chris_Lesniewski-Laas,M._Frans_Kaashoek	2010	Whanau: A Sybil-proof Distributed Hash Table.	db/conf/nsdi/nsdi2010.html#Lesniewski-LaasK10
2330628	Xin_Jin,Eric_Keller,Jennifer_Rexford	2012	Virtual Switching Without a Hypervisor for a More Secure Cloud.	db/conf/nsdi/hotice2012.html#JinKR12
2330641	Krishna_Chintalapudi,Vishnu_Navda,Ramachandran_Ramjee,Venkata_N._Padmanabhan,Chandra_R._Murthy	2011	res.	db/conf/nsdi/nsdi2011.html#ChintalapudiNRPM10
2330649	Paarijaat_Aditya,Mingchen_Zhao,Yin_Lin,Andreas_Haeberlen,Peter_Druschel,Bruce_M._Maggs,Bill_Wishon	2012	Reliable Client Accounting for P2P-Infrastructure Hybrids.	db/conf/nsdi/nsdi2012.html#AdityaZLHDMW12
2330651	Jayaram_Mudigonda,Praveen_Yalagandula,Mohammad_Al-Fares,Jeffrey_C._Mogul	2010	SPAIN: COTS Data-Center Ethernet for Multipathing over Arbitrary Topologies.	db/conf/nsdi/nsdi2010.html#MudigondaYAM10
2330653	Ethan_Katz-Bassett,Harsha_V._Madhyastha,Vijay_Kumar_Adhikari,Colin_Scott,Justine_Sherry,Peter_van_Wesep,Thomas_E._Anderson,Arvind_Krishnamurthy	2010	Reverse traceroute.	db/conf/nsdi/nsdi2010.html#Katz-BassettMASSWAK10
2330656	Adiseshu_Hari,Ramesh_Viswanathan,T._V._Lakshman,Y._J._Chang	2012	The Personal Cloud - Design, Architecture and Matchmaking Algorithms for Resource Management.	db/conf/nsdi/hotice2012.html#HariVLC12
2330658	Ye_Wang,Cheng_Huang,Jin_Li_0001,Philip_A._Chou,Yang_Richard_Yang	2011	QoSaaS: Quality of Service as a Service.	db/conf/nsdi/hotice2011.html#WangH0CY11
2330659	Ankit_Singla,Chi-Yao_Hong,Lucian_Popa,Philip_Brighten_Godfrey	2012	Jellyfish: Networking Data Centers Randomly.	db/conf/nsdi/nsdi2012.html#SinglaHPG12
2330660	Colin_Dixon,Hardeep_Uppal,Vjekoslav_Brajkovic,Dane_Brandon,Thomas_E._Anderson,Arvind_Krishnamurthy	2011	ETTM: A Scalable Fault Tolerant Network Manager.	db/conf/nsdi/nsdi2011.html#DixonUBBAK10
2330666	Mihai_Dobrescu,Katerina_J._Argyraki,Sylvia_Ratnasamy	2012	Toward Predictable Performance in Software Packet-Processing Platforms.	db/conf/nsdi/nsdi2012.html#DobrescuAR12
2330673	Bhavish_Agarwal,Aditya_Akella,Ashok_Anand,Athula_Balachandran,Pushkar_Chitnis,Chitra_Muthukrishnan,Ramachandran_Ramjee,George_Varghese	2010	EndRE: An End-System Redundancy Elimination Service for Enterprises.	db/conf/nsdi/nsdi2010.html#AgarwalAABCMRV10
2330675	Richard_Wang,Dana_Butnariu,Jennifer_Rexford	2011	OpenFlow-Based Server Load Balancing Gone Wild.	db/conf/nsdi/hotice2011.html#WangBR11
2330676	James_W._Mickens,Jeremy_Elson,Jon_Howell,Jay_Lorch	2010	Crom: Faster Web Browsing Using Speculative Execution.	db/conf/nsdi/nsdi2010.html#MickensEHL10
2330678	Jonathan_M._Hsieh,Steven_D._Gribble,Henry_M._Levy	2010	The Architecture and Implementation of an Extensible Web Crawler.	db/conf/nsdi/nsdi2010.html#HsiehGL10
2330679	Benjamin_Hindman,Andy_Konwinski,Matei_Zaharia,Ali_Ghodsi,Anthony_D._Joseph,Randy_H._Katz,Scott_Shenker,Ion_Stoica	2011	Mesos: A Platform for Fine-Grained Resource Sharing in the Data Center.	db/conf/nsdi/nsdi2011.html#HindmanKZGJKSS10
2330681	Sameer_Agarwal,Srikanth_Kandula,Nicolas_Bruno,Ming-Chuan_Wu,Ion_Stoica,Jingren_Zhou	2012	Reoptimizing Data Parallel Computing.	db/conf/nsdi/nsdi2012.html#AgarwalKBWSZ12
2330690	Alexander_Wieder,Pramod_Bhatotia,Ansley_Post,Rodrigo_Rodrigues	2012	Orchestrating the Deployment of Computations in the Cloud with Conductor.	db/conf/nsdi/nsdi2012.html#WiederBPR12
2330700	Souvik_Sen,Naveen_Santhapuri,Romit_Roy_Choudhury,Srihari_Nelakuditi	2010	AccuRate: Constellation Based Rate Estimation in Wireless Networks.	db/conf/nsdi/nsdi2010.html#SenSCN10
2330704	Franziska_Roesner,Tadayoshi_Kohno,David_Wetherall	2012	Detecting and Defending Against Third-Party Tracking on the Web.	db/conf/nsdi/nsdi2012.html#RoesnerKW12
2330705	Wonho_Kim,Puneet_Sharma,Jeongkeun_Lee,Sujata_Banerjee,Jean_Tourrilhes,Sung-Ju_Lee,Praveen_Yalagandula	2010	Automated and Scalable QoS Control for Network Convergence.	db/conf/nsdi/inm-wren2010.html#KimSLBTLY08
2330708	Dongsu_Han,Ashok_Anand,Fahad_R._Dogar,Boyan_Li,Hyeontaek_Lim,Michel_Machado,Arvind_Mukundan,Wenfei_Wu,Aditya_Akella,David_G._Andersen,John_W._Byers,Srinivasan_Seshan,Peter_Steenkiste	2012	XIA: Efficient Support for Evolvable Internetworking.	db/conf/nsdi/nsdi2012.html#HanADLLMMWAABSS12
2330711	Yashar_Ganjali,Amin_Tootoonchian	2010	HyperFlow: A Distributed Control Plane for OpenFlow.	db/conf/nsdi/inm-wren2010.html#GanjaliT08
2330712	Florin_Dinu,T._S._Eugene_Ng	2012	Synergy2Cloud: Introducing Cross-Sharing of Application Experiences Into the Cloud Management Cycle.	db/conf/nsdi/hotice2012.html#DinuN12
2330714	Aaron_Gember,Chris_Dragga,Aditya_Akella	2012	ECOS: Practical Mobile Application Offloading for Enterprises.	db/conf/nsdi/hotice2012.html#GemberDA12
2330717	Sourabh_Jain,Zhi-Li_Zhang	2011	Simplifying Manageability, Scalability and Host Mobility in Large-Scale Enterprise Networks using VEIL-click.	db/conf/nsdi/hotice2011.html#JainZ11
2330719	Sang_Kil_Cha,Iulian_Moraru,Jiyong_Jang,John_Truelove,David_Brumley,David_G._Andersen	2010	SplitScreen: Enabling Efficient, Distributed Malware Detection.	db/conf/nsdi/nsdi2010.html#ChaMJTBA10
2330720	Derek_Gordon_Murray,Malte_Schwarzkopf,Christopher_Smowton,Steven_Smith,Anil_Madhavapeddy,Steven_Hand	2011	CIEL: A Universal Execution Engine for Distributed Data-Flow Computing.	db/conf/nsdi/nsdi2011.html#MurraySSSMH10
2330721	Haryadi_S._Gunawi,Thanh_Do,Pallavi_Joshi,Peter_Alvaro,Joseph_M._Hellerstein,Andrea_C._Arpaci-Dusseau,Remzi_H._Arpaci-Dusseau,Koushik_Sen,Dhruba_Borthakur	2011	FATE and DESTINI: A Framework for Cloud Recovery Testing.	db/conf/nsdi/nsdi2011.html#GunawiDJAHAASB10
2330723	Indrajit_Roy,Srinath_T._V._Setty,Ann_Kilzer,Vitaly_Shmatikov,Emmett_Witchel	2010	Airavat: Security and Privacy for MapReduce.	db/conf/nsdi/nsdi2010.html#RoySKSW10
2330724	Ashok_Anand,Chitra_Muthukrishnan,Steven_Kappes,Aditya_Akella,Suman_Nath	2010	Cheap and Large CAMs for High Performance Data-Intensive Networked Systems.	db/conf/nsdi/nsdi2010.html#AnandMKAN10
2330725	Alexander_Rasmussen,George_Porter,Michael_Conley,Harsha_V._Madhyastha,Radhika_Niranjan_Mysore,Alexander_Pucher,Amin_Vahdat	2011	TritonSort: A Balanced Large-Scale Sorting System.	db/conf/nsdi/nsdi2011.html#RasmussenPCMMPV10
2330728	Eric_Keller,Jennifer_Rexford,Jacobus_E._van_der_Merwe	2010	Seamless BGP Migration with Router Grafting.	db/conf/nsdi/nsdi2010.html#KellerRM10
2330729	Haiyang_Qian,Deep_Medhi	2011	Server Operational Cost Optimization for Cloud Computing Service Providers over a Time Horizon.	db/conf/nsdi/hotice2011.html#QianM11
2330730	Stefano_Vissicchio,Luca_Cittadini,Maurizio_Pizzonia,Luca_Vergantini,Valerio_Mezzapesa,Maria_Luisa_Papagni	2010	Beyond the Best: Real-Time Non-Invasive Collection of BGP Messages.	db/conf/nsdi/inm-wren2010.html#VissicchioCPVMP08
2330732	Peyman_Kazemian,George_Varghese,Nick_McKeown	2012	Header Space Analysis: Static Checking for Networks.	db/conf/nsdi/nsdi2012.html#KazemianVM12
2330734	Anirudh_Badam,Vivek_S._Pai	2011	SSDAlloc: Hybrid SSD/RAM Memory Management Made Easy.	db/conf/nsdi/nsdi2011.html#BadamP10
2330735	Yuichiro_Hei,Akihiro_Nakao,Tomohiko_Ogishi,Toru_Hasegawa,Shu_Yamamoto	2010	vDC: Virtual Data Center Powered with AS Alliance for Enabling Cost-Effective Business Continuity and Coverage.	db/conf/nsdi/inm-wren2010.html#HeiNOHY08
2330737	Vinh_The_Lam,Michael_Mitzenmacher,George_Varghese	2010	Carousel: Scalable Logging for Intrusion Prevention Systems.	db/conf/nsdi/nsdi2010.html#LamMV10
2330741	Hui_Kang,Xiaoyun_Zhu,Jennifer_L._Wong	2012	DAPA: Diagnosing Application Performance Anomalies for Virtualized Infrastructures.	db/conf/nsdi/hotice2012.html#KangZW12
2330745	Boris_Nechaev,Mark_Allman,Vern_Paxson,Andrei_V._Gurtov	2010	A Preliminary Analysis of TCP Performance in an Enterprise Network.	db/conf/nsdi/inm-wren2010.html#NechaevAPG08
2330756	Frank_Uyeda,Luca_Foschini,Fred_Baker,Subhash_Suri,George_Varghese	2011	Efficiently Measuring Bandwidth at All Time Scales.	db/conf/nsdi/nsdi2011.html#UyedaFBSV10
2330759	Michael_Buettner,Benjamin_Greenstein,David_Wetherall	2011	Dewdrop: An Energy-Aware Runtime for Computational RFID.	db/conf/nsdi/nsdi2011.html#BuettnerGW10
2330761	Keon_Jang,Sangjin_Han,Seungyeop_Han,Sue_B._Moon,KyoungSoo_Park	2011	SSLShader: Cheap SSL Acceleration with Commodity Processors.	db/conf/nsdi/nsdi2011.html#JangHHMP10
2330765	Arvind_Thiagarajan,Lenin_Ravindranath,Hari_Balakrishnan,Samuel_Madden,Lewis_Girod	2011	Accurate, Low-Energy Trajectory Mapping for Mobile Devices.	db/conf/nsdi/nsdi2011.html#ThiagarajanRBMG10
2330767	Ting_Zhu,Ziguo_Zhong,Tian_He,Zhi-Li_Zhang	2010	Exploring Link Correlation for Efficient Flooding in Wireless Sensor Networks.	db/conf/nsdi/nsdi2010.html#ZhuZHZ10
2330768	Arun_Viswanathan,Alefiya_Hussain,Jelena_Mirkovic,Stephen_Schwab,John_Wroclawski	2011	A Semantic Framework for Data Analysis in Networked Systems.	db/conf/nsdi/nsdi2011.html#ViswanathanHMSW10
2330784	Matei_Zaharia,Mosharaf_Chowdhury,Tathagata_Das,Ankur_Dave,Justin_Ma,Murphy_McCauly,Michael_J._Franklin,Scott_Shenker,Ion_Stoica	2012	Resilient Distributed Datasets: A Fault-Tolerant Abstraction for In-Memory Cluster Computing.	db/conf/nsdi/nsdi2012.html#ZahariaCDDMMFSS12
2330795	Ganesh_Ananthanarayanan,Ali_Ghodsi,Andrew_Warfield,Dhruba_Borthakur,Srikanth_Kandula,Scott_Shenker,Ion_Stoica	2012	PACMan: Coordinated Memory Caching for Parallel Jobs.	db/conf/nsdi/nsdi2012.html#AnanthanarayananGWBKSS12
2330801	Andrew_D._Ferguson,Arjun_Guha,Jordan_Place,Rodrigo_Fonseca,Shriram_Krishnamurthi	2012	Participatory Networking.	db/conf/nsdi/hotice2012.html#FergusonGPFK12
2330808	Dushyant_Arora,Anja_Feldmann,Gregor_Schaffrath,Stefan_Schmid	2011	On the Benefit of Virtualization: Strategies for Flexible Server Allocation.	db/conf/nsdi/hotice2011.html#AroraFSS11
2330809	Ali_Ghodsi,Matei_Zaharia,Benjamin_Hindman,Andy_Konwinski,Scott_Shenker,Ion_Stoica	2011	Dominant Resource Fairness: Fair Allocation of Multiple Resource Types.	db/conf/nsdi/nsdi2011.html#GhodsiZHKSS10
2330811	Salman_Abdul_Baset,Long_Wang,Chunqiang_Tang	2012	Towards an Understanding of Oversubscription in Cloud.	db/conf/nsdi/hotice2012.html#BasetWT12
2330819	Yong_Liao,Dong_Yin,Lixin_Gao	2010	Europa: Efficient User Mode Packet Forwarding in Network Virtualization.	db/conf/nsdi/inm-wren2010.html#LiaoYG08
2330832	Saikat_Guha,Mudit_Jain,Venkata_N._Padmanabhan	2012	Koi: A Location-Privacy Platform for Smartphone Apps.	db/conf/nsdi/nsdi2012.html#GuhaJP12
2330845	Sayandeep_Sen,Neel_Kamal_Madabhushi,Suman_Banerjee	2010	Scalable WiFi Media Delivery through Adaptive Broadcasts.	db/conf/nsdi/nsdi2010.html#SenMB10
2330847	Marco_Canini,Daniele_Venzano,ni,Dejan_Kostic,Jennifer_Rexford	2012	A NICE Way to Test OpenFlow Applications.	db/conf/nsdi/nsdi2012.html#CaniniVPKR12
2330851	Qiang_Cao,Michael_Sirivianos,Xiaowei_Yang,Tiago_Pregueiro	2012	Aiding the Detection of Fake Accounts in Large Scale Social Online Services.	db/conf/nsdi/nsdi2012.html#CaoSYP12
2330857	Dongsu_Han,Ashok_Anand,Aditya_Akella,Srinivasan_Seshan	2012	RPT: Re-architecting Loss Protection for Content-Aware Networks.	db/conf/nsdi/nsdi2012.html#HanAAS12
2330861	Colin_Dixon,Ratul_Mahajan,Sharad_Agarwal,A._J._Bernheim_Brush,Bongshin_Lee,Stefan_Saroiu,Paramvir_Bahl	2012	An Operating System for the Home.	db/conf/nsdi/nsdi2012.html#DixonMABLSB12
2330863	Xu_Chen,Yun_Mao,Zhuoqing_Morley_Mao,Jacobus_E._van_der_Merwe	2011	KnowOps: Towards an Embedded Knowledge Base for Network Management and Operations.	db/conf/nsdi/hotice2011.html#ChenMMM11
2330865	Zheng_Zhang,Ming_Zhang,Albert_G._Greenberg,Y._Charlie_Hu,Ratul_Mahajan,Blaine_Christian	2010	Optimizing Cost and Performance in Online Service Provider Networks.	db/conf/nsdi/nsdi2010.html#ZhangZGHMC10
2330866	Mohammad_Al-Fares,Sivasankar_Radhakrishnan,Barath_Raghavan,Nelson_Huang,Amin_Vahdat	2010	Hedera: Dynamic Flow Scheduling for Data Center Networks.	db/conf/nsdi/nsdi2010.html#Al-FaresRRHV10
2330867	Saikat_Guha,Bin_Cheng,Paul_Francis	2011	Privad: Practical Privacy in Online Advertising.	db/conf/nsdi/nsdi2011.html#GuhaCF10
2330869	Pawan_Prakash,Advait_Abhay_Dixit,Y._Charlie_Hu,Ramana_Rao_Kompella	2012	The TCP Outcast Problem: Exposing Unfairness in Data Center Networks.	db/conf/nsdi/nsdi2012.html#PrakashDHK12
2330870	Paolo_Costa,Matteo_Migliavacca,Peter_R._Pietzuch,Alexander_L._Wolf	2012	NaaS: Network-as-a-Service in the Cloud.	db/conf/nsdi/hotice2012.html#CostaMPW12
2330873	Karthik_Nagaraj,Charles_Edwin_Killian,Jennifer_Neville	2012	Structured Comparative Analysis of Systems Logs to Diagnose Performance Problems.	db/conf/nsdi/nsdi2012.html#NagarajKN12
2330874	Theophilus_Benson,Ashok_Anand,Aditya_Akella,Ming_Zhang	2010	The Case for Fine-Grained Traffic Engineering in Data Centers.	db/conf/nsdi/inm-wren2010.html#BensonAAZ08
2330877	David_Breitgand,Gilad_Kutiel,Danny_Raz	2011	Cost-Aware Live Migration of Services in the Cloud.	db/conf/nsdi/hotice2011.html#BreitgandKR11
2330890	Damon_Wischik,Costin_Raiciu,Adam_Greenhalgh,Mark_Handley	2011	Design, Implementation and Evaluation of Congestion Control for Multipath TCP.	db/conf/nsdi/nsdi2011.html#WischikRGH10
2330891	Krishna_Chintalapudi,Bozidar_Radunovic,Horia_Vlad_Balan,Michael_Buettener,Srinivas_Yerramalli,Vishnu_Navda,Ramachandran_Ramjee	2012	WiFi-NC : WiFi Over Narrow Channels.	db/conf/nsdi/nsdi2012.html#ChintalapudiRBBYNR12
2330896	Michael_F._Nowlan,Nabin_Tiwari,Janardhan_R._Iyengar,Syed_Obaid_Amin,Bryan_Ford	2012	Fitting Square Pegs Through Round Pipes: Unordered Delivery Wire-Compatible with TCP and TLS.	db/conf/nsdi/nsdi2012.html#NowlanTIAF12
2330898	Siddhartha_Sen,Wyatt_Lloyd,Michael_J._Freedman	2010	Prophecy: Using History for High-Throughput Fault Tolerance.	db/conf/nsdi/nsdi2010.html#SenLF10
2477736	Swati_Rallapalli,Lili_Qiu,Yin_Zhang,Yi-Chao_Chen	2010	Exploiting temporal stability and low-rank structure for localization in mobile networks.	db/conf/mobicom/mobicom2010.html#RallapalliQZC10
2477739	Bastian_Bloessl,Stefan_Joerer,Fabian_Mauroner,Falko_Dressler	2012	Low-cost interferer detection and classification using TelosB sensor motes.	db/conf/mobicom/mobicom2012.html#BloesslJMD12
2477746	Narseo_Vallina-Rodriguez,Christos_Efstratiou,Geoffrey_Xie,Jon_Crowcroft	2011	Enabling opportunistic resources sharing on mobile operating systems: benefits and challenges.	db/conf/mobicom/s3-2011.html#Vallina-Rodriguez11
2477757	Narendra_Anand,Ehsan_Aryafar,Edward_W._Knightly	2010	WARPlab: a flexible framework for rapid physical layer design.	db/conf/mobicom/s3-2010.html#AnandAK10
2477771	Anders_Lindgren	2011	Social networking in a disconnected network: fbDTN: facebook over DTN.	db/conf/mobicom/chants2011.html#Lindgren11
2477774	Norihisa_Segawa,Jun_Sawamoto,Masato_Yazawa,Haruo_Tamaki	2012	A marine experiment of a long distance communication sensor network -MAD-SS-.	db/conf/mobicom/mobicom2012.html#SegawaSYT12
2477780	Kyle_Zaragoza,Nathan_Thai,Terrance_Christensen	2011	An implementation for accessing twitter across challenged networks.	db/conf/mobicom/chants2011.html#ZaragozaTC11
2477788	Mohammad_Nekoui,Hossein_Pishro-Nik	2010	Fundamental tradeoffs in vehicular ad hoc networks.	db/conf/mobicom/vanet2010.html#NekouiP10
2477806	Piotr_Szczurek,Bo_Xu,Ouri_Wolfson,Jie_Lin,Naphtali_Rishe	2010	Learning the relevance of parking information in VANETs.	db/conf/mobicom/vanet2010.html#SzczurekXWLR10
2477815	Amir_Krifa,Chadi_Barakat,Thrasyvoulos_Spyropoulos	2011	MobiTrade: trading content in disruption tolerant networks.	db/conf/mobicom/chants2011.html#KrifaBS11
2477816	Dong_Li,Tarun_Bansal,Zhixue_Lu,Prasun_Sinha	2012	MARVEL: multiple antenna based relative vehicle localizer.	db/conf/mobicom/mobicom2012.html#LiBLS12
2477825	ttner,Johannes_Morgenroth,Sebastian_Schildt,Lars_C._Wolf	2011	Performance comparison of DTN bundle protocol implementations.	db/conf/mobicom/chants2011.html#PottnerMSW11
2477826	Tam_Vu,Akash_Baid,Simon_Gao,Marco_Gruteser,Richard_E._Howard,Janne_Lindqvist,Predrag_Spasojevic,Jeffrey_Walling	2012	Distinguishing users with capacitive touch communication.	db/conf/mobicom/mobicom2012.html#VuBGGHLSW12
2477829	Michele_Segata,Renato_Lo_Cigno	2011	Emergency braking: a study of network and application performance.	db/conf/mobicom/vanet2011.html#SegataC11
2477837	Ioannis_Pefkianakis,Yun_Hu,Starsky_H._Y._Wong,Hao_Yang,Songwu_Lu	2010	MIMO rate adaptation in 802.11n wireless networks.	db/conf/mobicom/mobicom2010.html#PefkianakisHWYL10
2477838	Ashwin_Ashok,Marco_Gruteser,Narayan_B._Mandayam,Jayant_Silva,Michael_Varga,Kristin_J._Dana	2010	Challenge: mobile optical networks through visual MIMO.	db/conf/mobicom/mobicom2010.html#AshokGMSVD10
2477845	Brett_D._Higgins,Azarias_Reda,Timur_Alperovich,Jason_Flinn,Thomas_J._Giuli,Brian_Noble,David_Watson	2010	Intentional networking: opportunistic exploitation of mobile network diversity.	db/conf/mobicom/mobicom2010.html#HigginsRAFGNW10
2477858	Horia_Vlad_Balan,Ryan_Rogalin,Antonios_Michaloliakos,Konstantinos_Psounis,Giuseppe_Caire	2012	Achieving high data rates in a distributed MIMO system.	db/conf/mobicom/mobicom2012.html#BalanRMPC12
2477870	Ruogu_Zhou,Yongping_Xiong,Guoliang_Xing,Limin_Sun,Jian_Ma	2010	ZiFi: wireless LAN discovery via ZigBee interference signatures.	db/conf/mobicom/mobicom2010.html#ZhouXXSM10
2477883	John_B._Kenney,Gaurav_Bansal,Charles_E._Rohrs	2011	LIMERIC: a linear message rate control algorithm for vehicular DSRC systems.	db/conf/mobicom/vanet2011.html#KenneyBR11
2477892	Akira_Nagata,Shinya_Yamamura,Masato_Tsuru	2011	Web browsing over multiple heterogeneous challenged networks.	db/conf/mobicom/chants2011.html#NagataYT11
2477900	Nam_P._Nguyen,Thang_N._Dinh,Sindhura_Tokala,My_T._Thai	2011	Overlapping communities in dynamic networks: their detection and mobile applications.	db/conf/mobicom/mobicom2011.html#NguyenDTT11
2477903	Ehsan_Aryafar,Narendra_Anand,Theodoros_Salonidis,Edward_W._Knightly	2010	Design and experimental evaluation of multi-user beamforming in wireless LANs.	db/conf/mobicom/mobicom2010.html#AryafarASK10
2477917	Jongwon_Yoon,Honghai_Zhang,Suman_Banerjee,Sampath_Rangarajan	2012	MuVi: a multicast video delivery scheme for 4g cellular networks.	db/conf/mobicom/mobicom2012.html#YoonZBR12
2477920	Johannes_Morgenroth,Lars_C._Wolf	2012	Time-reference distribution in delay tolerant networks.	db/conf/mobicom/chants2012.html#MorgenrothW12
2477922	Ji-Hoon_Yun,Kang_G._Shin	2010	CTRL: a self-organizing femtocell management architecture for co-channel deployment.	db/conf/mobicom/mobicom2010.html#YunS10
2477930	Anand_Seetharam,Jim_Kurose,Dennis_Goeckel,Gautam_D._Bhanage	2011	A markov chain model for coarse timescale channel variation in an 802.16e wireless network.	db/conf/mobicom/s3-2011.html#SeetharamKGB11
2477931	Aditya_Dhananjay,Ashlesh_Sharma,Michael_Paik,Jay_Chen,Trishank_Karthik_Kuppusamy,Jinyang_Li,Lakshminarayanan_Subramanian	2010	Hermes: data transmission over unknown voice channels.	db/conf/mobicom/mobicom2010.html#DhananjaySPCKLS10
2477935	Jonathan_Vestin,Peter_Dely,Andreas_Kassler,Nico_Bayer,Hans_Joachim_Einsiedler,Christoph_Peylo	2012	CloudMAC: torwards software defined WLANs.	db/conf/mobicom/mobicom2012.html#VestinDKBEP12
2477936	Julien_Herzen,Adel_Aziz,Ruben_Merz,Seva_Shneer,Patrick_Thiran	2011	A measurement-based algorithm to maximize the utility of wireless networks.	db/conf/mobicom/s3-2011.html#HerzenAMST11
2477959	Jung_Il_Choi,Mayank_Jain,Kannan_Srinivasan,Philip_Levis,Sachin_Katti	2010	Achieving single channel, full duplex wireless communication.	db/conf/mobicom/mobicom2010.html#ChoiJSLK10
2477966	Chunyi_Peng,Guan-Hua_Tu,Chi-Yu_Li,Songwu_Lu	2012	Can we pay for what we get in 3G data access?	db/conf/mobicom/mobicom2012.html#PengTLL12
2477975	Andrew_Reynolds,Josh_King,Sascha_D._Meinrath,Thomas_Gideon	2011	The commotion wireless project.	db/conf/mobicom/chants2011.html#ReynoldsKMG11
2477990	Daniel_Willkomm,Adam_Wolisz	2010	Is oversensitive spectrum sensing the door opener for initial cognitive radio deployments?	db/conf/mobicom/s3-2010.html#WillkommW10
2477999	Ian_F._Akyildiz	2012	Nanonetworks: a new frontier in communications.	db/conf/mobicom/mobicom2012.html#Akyildiz12
2478000	Zhenjiang_Li,Wenwei_Chen,Cheng_Li,Mo_Li,Xiang-Yang_Li,Yunhao_Liu	2012	FLIGHT: clock calibration using fluorescent lighting.	db/conf/mobicom/mobicom2012.html#LiCLLLL12
2478004	Kok-Kiong_Yap,Sachin_Katti,Guru_M._Parulkar,Nick_McKeown	2010	Delivering capacity for the mobile internet by stitching together networks.	db/conf/mobicom/s3-2010.html#YapKPM10
2478019	Kaishun_Wu,Haoyu_Tan,Yunhuai_Liu,Jin_Zhang,Qian_Zhang,Lionel_M._Ni	2010	Side channel: bits over interference.	db/conf/mobicom/mobicom2010.html#WuTLZZN10
2478040	Dinan_Gunawardena,Thomas_Karagiannis,re,Elizeu_Santos-Neto,Milan_Vojnovic	2011	Scoop: decentralized and opportunistic multicasting of information streams.	db/conf/mobicom/mobicom2011.html#GunawardenaKPSV11
2478044	Johannes_Morgenroth,gel,Robert_Heitz,Lars_C._Wolf	2011	Delay-tolerant networking in restricted networks.	db/conf/mobicom/chants2011.html#MorgenrothPHW11
2478055	Tianji_Li,Mi_Kyung_Han,Apurv_Bhartia,Lili_Qiu,Eric_Rozner,Yin_Zhang,Brad_W._Zarikoff	2011	CRMA: collision-resistant multiple access.	db/conf/mobicom/mobicom2011.html#LiHBQRZZ11
2478072	Giacomo_Lo_Giusto,Afra_J._Mashhadi,Licia_Capra	2010	Folksonomy-based reasoning for content dissemination in mobile settings.	db/conf/mobicom/chants2010.html#GiustoMC10
2478089	Yair_Allouche,Michael_Segal	2011	Near-optimal, reliable and self-organizing hierarchical topology in VANET.	db/conf/mobicom/vanet2011.html#YairS11
2478091	inen,nen,Paul_Houghton,rg_Ott	2012	SCAMPI application platform.	db/conf/mobicom/chants2012.html#KarkkainenPHO12
2478114	Muhammad_Shahzad,Alex_X._Liu	2012	Every bit counts: fast and scalable RFID estimation.	db/conf/mobicom/mobicom2012.html#ShahzadL12
2478115	Mayank_Jain,Jung_Il_Choi,Taemin_Kim,Dinesh_Bharadia,Siddharth_Seth,Kannan_Srinivasan,Philip_Levis,Sachin_Katti,Prasun_Sinha	2011	Practical, real-time, full duplex wireless.	db/conf/mobicom/mobicom2011.html#JainCKBSSLKS11
2478129	Ram_Keralapura,Antonio_Nucci,Zhi-Li_Zhang,Lixin_Gao	2010	Profiling users in a 3g network using hourglass co-clustering.	db/conf/mobicom/mobicom2010.html#KeralapuraNZG10
2478130	Riccardo_Crepaldi,Ryan_Beavers,Braden_Ehrat,Matt_Jaeger,Steven_Biersteker,Robin_Kravets	2012	LoadingZones: leveraging street parking to enable vehicular internet access.	db/conf/mobicom/chants2012.html#CrepaldiBEJBK12
2478132	Shan-Hsiang_Shen,Aaron_Gember,Ashok_Anand,Aditya_Akella	2011	REfactor-ing content overhearing to improve wireless performance.	db/conf/mobicom/mobicom2011.html#ShenGAA11
2478138	Samuel_C._Nelson,Robin_Kravets	2010	For members only: local and robust group management in DTNS.	db/conf/mobicom/chants2010.html#NelsonK10
2478139	Johannes_Morgenroth,Sebastian_Schildt,Lars_C._Wolf	2012	A bundle protocol implementation for android devices.	db/conf/mobicom/mobicom2012.html#MorgenrothSW12
2478164	Saumay_Pushp,Tae_Hun_Cho,Jongwon_Han,Dongman_Lee,Junehwa_Song,Sunghee_Choi	2012	An efficient way to track peers in mobile P2P network.	db/conf/mobicom/mobicom2012.html#PushpCHLSC12
2478167	Robert_Karl_Schmidt,Achim_Brakemeier,ller,Frank_Kargl,fer	2011	Advanced carrier sensing to resolve local channel congestion.	db/conf/mobicom/vanet2011.html#SchmidtBLKS11
2478169	Supratim_Deb,Kanthi_Nagaraj,Vikram_Srinivasan	2011	MOTA: engineering an operator agnostic mobile service.	db/conf/mobicom/mobicom2011.html#DebNS11
2478170	Amir_Alexander_Hasson	2010	The last inch of the last mile challenge.	db/conf/mobicom/chants2010.html#Hasson10
2478172	Gautam_S._Thakur,Ahmed_Helmy,Wei-jen_Hsu	2010	Similarity analysis and modeling in mobile societies: the missing link.	db/conf/mobicom/chants2010.html#ThakurHH10
2478186	Samuel_C._Nelson,Robin_Kravets	2010	Achieving anycast in DTNs by enhancing existing unicast protocols.	db/conf/mobicom/chants2010.html#NelsonK10a
2478187	Andreas_Festag,Long_Le,Maria_Goleva	2011	Field operational tests for cooperative systems: a tussle between research, standardization and deployment.	db/conf/mobicom/vanet2011.html#FestagLG11
2478192	Yang_Song,Starsky_H._Y._Wong,Kang-Won_Lee	2011	Optimal gateway selection in multi-domain wireless networks: a potential game perspective.	db/conf/mobicom/mobicom2011.html#SongWL11
2478196	Szymon_Jakubczak,Dina_Katabi	2010	SoftCast: clean-slate scalable wireless video.	db/conf/mobicom/s3-2010.html#JakubczakK10
2478197	Angela_Hennessy,Alex_Gladd,Brenton_D._Walker	2012	Nullspace-based stopping conditions for network-coded transmissions in DTNs.	db/conf/mobicom/chants2012.html#HennessyGW12
2478201	Anshul_Rai,Krishna_Kant_Chintalapudi,Venkata_N._Padmanabhan,Rijurekha_Sen	2012	Zee: zero-effort crowdsourcing for indoor localization.	db/conf/mobicom/mobicom2012.html#RaiCPS12
2478210	Jiansong_Zhang,Haichen_Shen,Kun_Tan,Ranveer_Chandra,Yongguang_Zhang,Qian_Zhang	2012	Frame retransmissions considered harmful: improving spectrum efficiency using Micro-ACKs.	db/conf/mobicom/mobicom2012.html#ZhangSTCZZ12
2478211	Mehedi_Bakht,Matt_Trower,Robin_Hillary_Kravets	2012	Searchlight: won't you be my neighbor?	db/conf/mobicom/mobicom2012.html#BakhtTK12
2478217	Milena_Radenkovic,Ivan_Vaghi	2012	Adaptive user anonymity for mobile opportunistic networks.	db/conf/mobicom/chants2012.html#RadenkovicV12
2478220	Xiaozheng_Tie,Arun_Venkataramani,Aruna_Balasubramanian	2011	R3: robust replication routing in wireless networks with diverse connectivity characteristics.	db/conf/mobicom/mobicom2011.html#TieVB11
2478227	Xinyu_Zhang,Kang_G._Shin	2011	E-MiLi: energy-minimizing idle listening in wireless networks.	db/conf/mobicom/mobicom2011.html#ZhangS11
2478229	Bo_Han,Pan_Hui,V._S._Anil_Kumar,Madhav_V._Marathe,Guanhong_Pei,Aravind_Srinivasan	2010	Cellular traffic offloading through opportunistic communications: a case study.	db/conf/mobicom/chants2010.html#HanHKMPS10
2478249	Siripuram_Aditya,Sachin_Katti	2011	FlexCast: graceful wireless video streaming.	db/conf/mobicom/mobicom2011.html#AdityaK11
2478265	Vladimir_Vukadinovic,Stefan_Mangold	2011	Opportunistic wireless communication in theme parks: a study of visitors mobility.	db/conf/mobicom/chants2011.html#VukadinovicM11
2478274	Bo_Han,Francesco_Gringoli,Luca_Cominardi	2010	Bologna: block-based 802.11 transmission recovery.	db/conf/mobicom/s3-2010.html#HanGC10
2478283	Radhika_Mittal,Aman_Kansal,Ranveer_Chandra	2012	Empowering developers to estimate app energy consumption.	db/conf/mobicom/mobicom2012.html#MittalKC12
2478294	Yung-Chih_Chen,Jim_Kurose,Don_Towsley	2011	A simple queueing network model of mobility in a campus wireless network.	db/conf/mobicom/s3-2011.html#ChenKT11
2478310	Dongsheng_Zhang,Santosh_Ajith_Gogi,Dan_Broyles,etinkaya,James_P._G._Sterbenz	2012	Modelling wireless challenges.	db/conf/mobicom/mobicom2012.html#ZhangGBCS12
2478321	Eugenio_Magistretti,Omer_Gurewitz,Edward_W._Knightly	2012	802.11ec: collision avoidance without control messages.	db/conf/mobicom/mobicom2012.html#MagistrettiGK12
2478322	Kannan_Srinivasan,Mayank_Jain,Jung_Il_Choi,Tahir_Azim,Edward_S._Kim,Philip_Levis,Bhaskar_Krishnamachari	2010	The kappa factor: inferring protocol performance using inter-link reception correlation.	db/conf/mobicom/mobicom2010.html#SrinivasanJCAKLK10
2478333	Amr_Al_Jarhi,Hend_Adel_Arafa,Khaled_A._Harras,Sherif_G._Aly	2011	Rethinking opportunistic routing using space syntax.	db/conf/mobicom/chants2011.html#JarhiAHA11
2478336	a_W._Richa,Christian_Scheideler,Stefan_Schmid,Jin_Zhang	2011	Towards jamming-resistant and competitive medium access in the SINR model.	db/conf/mobicom/s3-2011.html#RichaSSZ11
2478337	Tiffany_Hyun-Jin_Kim,Ahren_Studer,Rituik_Dubey,Xin_Zhang_0003,Adrian_Perrig,Fan_Bai,Bhargav_Bellur,Aravind_Iyer	2010	VANET alert endorsement using multi-source filters.	db/conf/mobicom/vanet2010.html#KimSDZPBBI10
2478341	Danilo_De_Donno,Fabio_Ricciato,Luca_Catarinucci,Angelo_Coluccia,Luciano_Tarricone	2010	Challenge: towards distributed RFID sensing with software-defined radio.	db/conf/mobicom/mobicom2010.html#DonnoRCCT10
2478348	Ray_K._Lam,P._R._Kumar	2010	Dynamic channel partition and reservation for structured channel access in vehicular networks.	db/conf/mobicom/vanet2010.html#LamK10
2478351	Souvik_Sen,Romit_Roy_Choudhury,Srihari_Nelakuditi	2011	No time to countdown: migrating backoff to the frequency domain.	db/conf/mobicom/mobicom2011.html#SenCN11
2478365	Michele_Segata,Falko_Dressler,Renato_Lo_Cigno,Mario_Gerla	2012	A simulation tool for automated platooning in mixed highway scenarios.	db/conf/mobicom/mobicom2012.html#SegataDCG12
2478367	Mustafa_Y._Arslan,Jongwon_Yoon,Karthikeyan_Sundaresan,Srikanth_V._Krishnamurthy,Suman_Banerjee	2011	FERMI: a femtocell resource management system forinterference mitigation in OFDMA networks.	db/conf/mobicom/mobicom2011.html#ArslanYSKB11
2478373	Kiran_K._Rachuri,Cecilia_Mascolo,Mirco_Musolesi,Peter_J._Rentfrow	2011	SociableSense: exploring the trade-offs of adaptive sampling and computation offloading for social sensing.	db/conf/mobicom/mobicom2011.html#RachuriMMR11
2478388	Wei-Liang_Shen,Yu-Chih_Tung,Kuang-Che_Lee,Kate_Ching-Ju_Lin,Shyamnath_Gollakota,Dina_Katabi,Ming-Syan_Chen	2012	Rate adaptation for 802.11 multiuser mimo networks.	db/conf/mobicom/mobicom2012.html#ShenTLLGKC12
2478389	Xiao_Lin_Liu,Wenjun_Hu,Qifan_Pu,Feng_Wu,Yongguang_Zhang	2012	ParCast: soft video delivery in MIMO-OFDM WLANs.	db/conf/mobicom/mobicom2012.html#LiuHPWZ12
2478411	Dejun_Yang,Guoliang_Xue,Xi_Fang,Jian_Tang	2012	Crowdsourcing to smartphones: incentive mechanism design for mobile phone sensing.	db/conf/mobicom/mobicom2012.html#YangXFT12
2478412	Sacha_Trifunovic,Bernhard_Distl,Dominik_Schatzmann,Franck_Legendre	2011	WiFi-Opp: ad-hoc-less opportunistic networking.	db/conf/mobicom/chants2011.html#TrifunovicDSL11
2478413	mann	2012	Proximity enhanced mobile D2D video streaming.	db/conf/mobicom/mobicom2012.html#Grossmann12
2478437	Hua_Qin,Wensheng_Zhang_0001	2011	Charging scheduling with minimal waiting in a network of electric vehicles and charging stations.	db/conf/mobicom/vanet2011.html#QinZ11
2478438	Yuning_Song,Liang_Liu,Huadong_Ma,Athanasios_V._Vasilakos	2012	Physarum optimization: a new heuristic algorithm to minimal exposure problem.	db/conf/mobicom/mobicom2012.html#SongLMV12
2478452	Eugenio_Magistretti,Krishna_Kant_Chintalapudi,Bozidar_Radunovic,Ramachandran_Ramjee	2011	WiFi-Nano: reclaiming WiFi efficiency through 800 ns slots.	db/conf/mobicom/mobicom2011.html#MagistrettiCRR11
2478455	Johannes_Morgenroth,gel,Lars_C._Wolf	2011	Live-streaming in delay tolerant networks.	db/conf/mobicom/chants2011.html#MorgenrothPW11
2478456	Xiaozheng_Tie,Anand_Seetharam,Arun_Venkataramani,Deepak_Ganesan,Dennis_L._Goeckel	2011	Anticipatory wireless bitrate control for blocks.	db/conf/mobicom/s3-2011.html#TieSVGG11
2478468	Karthik_Nilakant,Eiko_Yoneki	2012	Pocket backup storage system with cloud integration.	db/conf/mobicom/chants2012.html#NilakantY12
2478474	Sang-Yoon_Chang,Yih-Chun_Hu,Nicola_Laurenti	2012	SimpleMAC: a jamming-resilient MAC-layer protocol for wireless channel coordination.	db/conf/mobicom/mobicom2012.html#ChangHL12
2478497	Changbin_Liu,Xiaozhou_Li,Shivkumar_Muthukumar,Harjot_Gill,Taher_Saeed,Boon_Thau_Loo,Prithwish_Basu	2010	PUMA: policy-based unified management architecture for wireless networking.	db/conf/mobicom/s3-2010.html#LiuLMGSLB10
2478505	Zhenjiang_Li,Cheng_Li,Wenwei_Chen,Jingyao_Dai,Mo_Li,Xiang-Yang_Li,Yunhao_Liu	2012	Clock calibration using fluorescent lighting.	db/conf/mobicom/mobicom2012.html#LiLCDLLL12
2478510	Haitham_Hassanieh,Fadel_Adib,Dina_Katabi,Piotr_Indyk	2012	Faster GPS via the sparse fourier transform.	db/conf/mobicom/mobicom2012.html#HassaniehAKI12
2478511	Rafael_P._Laufer,Theodoros_Salonidis,Henrik_Lundgren,Pascal_Le_Guyadec	2011	XPRESS: a cross-layer backpressure architecture for wireless multi-hop networks.	db/conf/mobicom/mobicom2011.html#LauferSLG11
2478524	Clayton_Shepard,Hang_Yu,Narendra_Anand,Erran_L._Li,Thomas_L._Marzetta,Yang_Richard_Yang,Lin_Zhong	2012	Argos: practical many-antenna base stations.	db/conf/mobicom/mobicom2012.html#ShepardYALMYZ12
2478529	Kyu-Han_Kim,Alexander_W._Min,Kang_G._Shin	2010	Sybot: an adaptive and mobile spectrum survey system for wifi networks.	db/conf/mobicom/mobicom2010.html#KimMS10
2478544	Zhangyu_Guan,Tommaso_Melodia,Dongfeng_Yuan,Dimitrios_A._Pados	2011	Distributed spectrum management and relay selection in interference-limited cooperative wireless networks.	db/conf/mobicom/mobicom2011.html#GuanMYP11
2478551	Hsu-Chun_Hsiao,Ahren_Studer,Chen_Chen_0013,Adrian_Perrig,Fan_Bai,Bhargav_Bellur,Aravind_Iyer	2011	Flooding-resilient broadcast authentication for VANETs.	db/conf/mobicom/mobicom2011.html#HsiaoSCPBBI11
2478559	Gianpiero_Costantino,Fabio_Martinelli,Paolo_Santi,Dario_Amoruso	2012	An implementation of secure two-party computation for smartphones with application to privacy-preserving interest-cast.	db/conf/mobicom/mobicom2012.html#CostantinoMSA12
2478563	Yanyan_Zhuang,Jianping_Pan,Lin_Cai	2010	A probabilistic model for message propagation in two-dimensional vehicular ad-hoc networks.	db/conf/mobicom/vanet2010.html#ZhuangPC10
2478589	Earl_Oliver	2010	Diversity in smartphone energy consumption.	db/conf/mobicom/s3-2010.html#Oliver10
2478597	Kirill_Kononenko	2012	A unified approach to identifying and healing vulnerabilities in x86 machine code.	db/conf/mobicom/mobicom2012.html#Kononenko12
2478617	Cheng-Lin_Tsao,Sandeep_Kakumanu,Raghupathy_Sivakumar	2011	SmartVNC: an effective remote computing solution for smartphones.	db/conf/mobicom/mobicom2011.html#TsaoKS11
2478618	Shu_Zhang,Vinny_Cahill	2011	Towards collision-free medium access control in vehicular ad-hoc networks.	db/conf/mobicom/vanet2011.html#ZhangC11
2478620	Apurv_Bhartia,Yi-Chao_Chen,Swati_Rallapalli,Lili_Qiu	2011	Harnessing frequency diversity in wi-fi networks.	db/conf/mobicom/mobicom2011.html#BhartiaCRQ11
2478625	Jung_Ryu,Vidur_Bhargava,Nick_Paine,Sanjay_Shakkottai	2010	Back-pressure routing and rate control for ICNs.	db/conf/mobicom/mobicom2010.html#RyuBPS10
2478638	Qiang_Liu,Ze_Zhao,Li_Cui	2012	A wideband compressed spectrum sensing platform for dynamic spectrum access networks.	db/conf/mobicom/mobicom2012.html#LiuZC12
2478641	Eiko_Yoneki	2011	FluPhone study: virtual disease spread using haggle.	db/conf/mobicom/chants2011.html#Yoneki11
2478643	Szymon_Jakubczak,Dina_Katabi	2011	A cross-layer design for scalable mobile video.	db/conf/mobicom/mobicom2011.html#JakubczakK11
2478646	Onur_Altintas,Yutaka_Ihara,Haris_Kremo,Hideaki_Tanaka,Masaaki_Ohtake,Takeo_Fujii,Chikara_Yoshimura,Keisuke_Ando,Kazuya_Tsukamoto,Masato_Tsuru,Yuji_Oie	2012	Field tests and indoor emulation of distributed autonomous multi-hop vehicle-to-vehicle communications over TV white space.	db/conf/mobicom/mobicom2012.html#AltintasIKTOFYATTO12
2478652	Jason_J._Haas,Yih-Chun_Hu	2010	Communication requirements for crash avoidance.	db/conf/mobicom/vanet2010.html#HaasH10
2478655	Hanno_Wirtz,David_Martin_0001,Benjamin_Grap,Klaus_Wehrle	2012	On-demand content-centric wireless networking.	db/conf/mobicom/mobicom2012.html#WirtzMGW12
2478661	Samo_Grasic,Anders_Lindgren	2012	An analysis of evaluation practices for DTN routing protocols.	db/conf/mobicom/chants2012.html#GrasicL12
2478664	Keren_Tan,Guanhua_Yan,Jihwang_Yeo,David_Kotz	2010	A correlation attack against user mobility privacy in a large-scale WLAN network.	db/conf/mobicom/s3-2010.html#TanYYK10
2478676	Dong_Li,Tarun_Bansal,Zhixue_Lu,Prasun_Sinha	2012	MARVEL: multiple antenna based relative vehicle localizer.	db/conf/mobicom/mobicom2012.html#LiBLS12a
2478677	Karthik_Budigere,Binoy_Chemmagate,Junxi_Yin,Markus_Nurminen,Eero_Martela,Ankit_Kumar,Richa_Khera,Nutan_Sawant	2011	GRID: a DTN based localized social networking and messaging application.	db/conf/mobicom/chants2011.html#BudigereCYNMKKS11
2478686	Rajalakshmi_Nandakumar,Krishna_Kant_Chintalapudi,Venkata_N._Padmanabhan	2012	Centaur: locating devices in an office environment.	db/conf/mobicom/mobicom2012.html#NandakumarCP12
2478689	Sebastian_Schildt,Till_Lorentzen,Johannes_Morgenroth,ttner,Lars_C._Wolf	2012	Free-riding the BitTorrent DHT to improve DTN connectivity.	db/conf/mobicom/chants2012.html#SchildtLMPW12
2478693	Dijiang_Huang,Swaroop_Shere,Soyoung_Ahn	2010	Dynamic highway congestion detection and prediction based on shock waves.	db/conf/mobicom/vanet2010.html#HuangSA10
2478695	Robert_Lasowski,Florian_Gschwandtner	2011	A novel beaconing approach based on sender-centric movement predictions for collision avoidance in VANETS.	db/conf/mobicom/vanet2011.html#LasowskiG11
2478704	Aditya_Gudipati,Stephanie_Pereira,Sachin_Katti	2012	AutoMAC: rateless wireless concurrent medium access.	db/conf/mobicom/mobicom2012.html#GudipatiPK12
2478708	Zheng_Yang,Chenshu_Wu,Yunhao_Liu	2012	Locating in fingerprint space: wireless indoor localization with little human intervention.	db/conf/mobicom/mobicom2012.html#YangWL12
2478711	Ionut_Constandache,Xuan_Bao,Martin_Azizyan,Romit_Roy_Choudhury	2010	Did you see Bob?: human localization using mobile phones.	db/conf/mobicom/mobicom2010.html#ConstandacheBAC10
2478728	Sujoy_Saha,Vijay_Kumar_Shah,Rohit_Verma,Ratna_Mandal,Subrata_Nandi	2012	Is it worth taking a planned approach to design ad hoc infrastructure for post disaster communication?	db/conf/mobicom/chants2012.html#SahaSVMN12
2478736	Dongwoon_Hahn,Ginnah_Lee,Youngil_Kim,Brenton_D._Walker,Matthew_Beecher,Padma_Mundur	2010	DTN experiments on the virtual meshtest testbed.	db/conf/mobicom/chants2010.html#HahnLKWBM10
2478754	Eugenio_Magistretti,Omer_Gurewitz,Edward_W._Knightly	2010	Inferring and mitigating a link's hindering transmissions in managed 802.11 wireless networks.	db/conf/mobicom/mobicom2010.html#MagistrettiGK10
2478757	etinkaya,Justin_P._Rohrer,Abdul_Jabbar,Mohammed_J._F._Alenazi,Dongsheng_Zhang,Dan_Broyles,Kamakshi_Sirisha_Pathapati,Hemanth_Narra,Kevin_Peters,Santosh_Ajith_Gogi,James_P._G._Sterbenz	2012	Protocols for highly-dynamic airborne networks.	db/conf/mobicom/mobicom2012.html#CetinkayaRJAZBPNPGS12
2478758	Jie_Yang_0003,Simon_Sidhom,Gayathri_Chandrasekaran,Tam_Vu,Hongbo_Liu,Nicolae_Cecan,Yingying_Chen_0001,Marco_Gruteser,Richard_P._Martin	2011	Detecting driver phone use leveraging car speakers.	db/conf/mobicom/mobicom2011.html#YangSCVLCCGM11
2478761	Berk_Birand,Maria_Chudnovsky,Bernard_Ries,Paul_D._Seymour,Gil_Zussman,Yori_Zwols	2010	Analyzing the performance of greedy maximal scheduling via local pooling and graph theory.	db/conf/mobicom/s3-2010.html#BirandCRSZZ10
2478771	Chunyi_Peng,Suk-Bok_Lee,Songwu_Lu,Haiyun_Luo,Hewu_Li	2011	Traffic-driven power saving in operational 3G cellular networks.	db/conf/mobicom/mobicom2011.html#PengLLLL11
2478776	liz_Seray_Tuncay,Giacomo_Benincasa,Ahmed_Helmy	2012	Autonomous and distributed recruitment and data collection framework for opportunistic sensing.	db/conf/mobicom/mobicom2012.html#TuncayBH12
2478777	John_Whitbeck,Marcelo_Dias_de_Amorim,Vania_Conan,Jean-Loup_Guillaume	2012	Temporal reachability graphs.	db/conf/mobicom/mobicom2012.html#WhitbeckACG12
2478779	Razvan_Beuran,Shinsuke_Miwa,Yoichi_Shinoda	2012	Performance evaluation of DTN implementations on a large-scale network emulation testbed.	db/conf/mobicom/chants2012.html#BeuranMS12
2478780	Brenton_D._Walker,Calvin_Ardi,Agoston_Petz,Jung_Ryu,Christine_Julien	2011	Experiments on the spatial distribution of network code diversity in segmented DTNs.	db/conf/mobicom/chants2011.html#WalkerAPRJ11
2478785	P._R._Kumar	2012	Three theories for delays, clocks and security in wireless networks.	db/conf/mobicom/mobicom2012.html#Kumar12
2478799	Daniel_Wu,Dhruv_Gupta_0001,Prasant_Mohapatra	2010	QuRiNet: a wireless testbed for network and ecological research.	db/conf/mobicom/s3-2010.html#Wu0M10
2478809	Shizhen_Zhao,Luoyi_Fu,Xinbing_Wang,Qian_Zhang	2011	Fundamental relationship between NodeDensity and delay in wireless ad hoc networks with unreliable links.	db/conf/mobicom/mobicom2011.html#ZhaoFWZ11
2478825	Ardalan_Amiri_Sani,Lin_Zhong,Ashutosh_Sabharwal	2010	Directional antenna diversity for mobile devices: characterizations and solutions.	db/conf/mobicom/mobicom2010.html#SaniZS10
2478831	Dirk_Van_Bruggen,Calvin_Ardi	2010	A relative time implementation for delay-tolerant networks.	db/conf/mobicom/chants2010.html#BruggenA10
2478843	Guanfeng_Liang,Nitin_H._Vaidya	2010	Capacity of byzantine agreement: summary of recent results.	db/conf/mobicom/s3-2010.html#LiangV10
2478845	Hisato_Iwai,Ippei_Sugae	2010	Path loss and delay profile models for its in 700mhz band.	db/conf/mobicom/vanet2010.html#IwaiS10
2478849	Ehsan_Aryafar,Mohammad_Ali_Khojastepour,Karthikeyan_Sundaresan,Sampath_Rangarajan,Mung_Chiang	2012	MIDU: enabling MIMO full duplex.	db/conf/mobicom/mobicom2012.html#AryafarKSRC12
2478850	Pavan_K._Athivarapu,Ranjita_Bhagwan,Saikat_Guha,Vishnu_Navda,Ramachandran_Ramjee,Dushyant_Arora,Venkata_N._Padmanabhan,George_Varghese	2012	RadioJockey: mining program execution to optimize cellular radio usage.	db/conf/mobicom/mobicom2012.html#AthivarapuBGNRAPV12
2478855	Rik_Sarkar,Jie_Gao	2010	Differential forms for target tracking and aggregate queries in distributed networks.	db/conf/mobicom/mobicom2010.html#SarkarG10
2478870	Hui_Zang,Jean_Bolot	2011	Anonymization of location data does not work: a large-scale measurement study.	db/conf/mobicom/mobicom2011.html#ZangB11
2478876	Ozlem_Bilgir_Yetim,Margaret_Martonosi	2012	Adaptive usage of cellular and WiFi bandwidth: an optimal scheduling formulation.	db/conf/mobicom/chants2012.html#YetimM12
2478889	Peter_Anthony_Iannucci,Jonathan_Perry,Hari_Balakrishnan,Devavrat_Shah	2012	No symbol left behind: a link-layer protocol for rateless codes.	db/conf/mobicom/mobicom2012.html#IannucciPBS12
2478891	Hongbo_Liu,Yu_Gan,Jie_Yang_0003,Simon_Sidhom,Yan_Wang_0003,Yingying_Chen_0001,Fan_Ye	2012	Push the limit of WiFi based localization for smartphones.	db/conf/mobicom/mobicom2012.html#LiuGYSWCY12
2478906	Shruti_Sanadhya,Raghupathy_Sivakumar,Kyu-Han_Kim,Paul_Congdon,Sriram_Lakshmanan,Jatinder_Pal_Singh	2012	Asymmetric caching: improved network deduplication for mobile devices.	db/conf/mobicom/mobicom2012.html#SanadhyaSKCLS12
2478909	Amin_Karbasi	2010	From centralized to distributed sensor localization.	db/conf/mobicom/s3-2010.html#Karbasi10
2478916	Aaron_Schulman,Vishnu_Navda,Ramachandran_Ramjee,Neil_Spring,Pralhad_Deshpande,Calvin_Grunewald,Kamal_Jain,Venkata_N._Padmanabhan	2010	Bartendr: a practical approach to energy-aware cellular data scheduling.	db/conf/mobicom/mobicom2010.html#SchulmanNRSDGJP10
2478921	Giacomo_Bernardi,Matt_Calder,Damon_Fenacci,Alex_Macmillan,Mahesh_K._Marina	2010	Stix: a goal-oriented distributed management system for large-scale broadband wireless access networks.	db/conf/mobicom/mobicom2010.html#BernardiCFMM10
2478945	Hanno_Wirtz,Tobias_Heer,Robert_Backhaus,Klaus_Wehrle	2011	Establishing mobile ad-hoc networks in 802.11 infrastructure mode.	db/conf/mobicom/chants2011.html#WirtzHBW11
2478948	Souvik_Sen,Romit_Roy_Choudhury,Srihari_Nelakuditi	2010	CSMA/CN: carrier sense multiple access with collision notification.	db/conf/mobicom/mobicom2010.html#SenCN10
2478950	Jay_Chen,Lakshminarayanan_Subramanian,Eric_A._Brewer	2010	SMS-based web search for low-end mobile devices.	db/conf/mobicom/mobicom2010.html#ChenSB10
2478951	Krishna_Chintalapudi,Anand_Padmanabha_Iyer,Venkata_N._Padmanabhan	2010	Indoor localization without the pain.	db/conf/mobicom/mobicom2010.html#ChintalapudiIP10
2478953	Filipe_Neves,Cardote,Ricardo_Moreira,Susana_Sargento	2011	Real-world evaluation of IEEE 802.11p for vehicular networks.	db/conf/mobicom/vanet2011.html#NevesCMS11
2478955	Fan_Bai,Daniel_D._Stancil,Hariharan_Krishnan	2010	Toward understanding characteristics of dedicated short range communications (DSRC) from a perspective of vehicular network engineers.	db/conf/mobicom/mobicom2010.html#BaiSK10
2478956	Tristan_Gaugel,Felix_Schmidt-Eisenlohr,Jens_Mittag,Hannes_Hartenstein	2011	A change in perspective: information-centric modeling of inter-vehicle communication.	db/conf/mobicom/vanet2011.html#GaugelSMH11
2478961	Hongsheng_Lu,Christian_Poellabauer	2011	Analysis of application-specific broadcast reliability for vehicle safety communications.	db/conf/mobicom/vanet2011.html#LuP11
2478970	Mohammad_Nekoui,Hossein_Pishro-Nik	2011	Analytic design of active vehicular safety systems in sparse traffic.	db/conf/mobicom/vanet2011.html#NekouiP11
2478974	Pavlos_Nikolopoulos,Therapon_Papadimitriou,Panagiotis_Pantazopoulos,Merkourios_Karaliopoulos,Ioannis_Stavrakakis	2011	How much off-center are centrality metrics for routing in opportunistic networks.	db/conf/mobicom/chants2011.html#NikolopoulosPPK11
2478980	Nathanael_Thompson,Riccardo_Crepaldi,Robin_Kravets	2010	Locus: a location-based data overlay for disruption-tolerant networks.	db/conf/mobicom/chants2010.html#ThompsonCK10
2478988	Andreea_Picu,Thrasyvoulos_Spyropoulos	2010	Distributed stochastic optimization in opportunistic networks: the case of optimal relay selection.	db/conf/mobicom/chants2010.html#PicuS10
2478998	Riccardo_Crepaldi,Ryan_Beavers,Braden_Ehrat,Jason_Sze,Matt_Jaeger,Steven_Biersteker,Robin_Kravets	2012	LoadingZones: leveraging street parking to enable vehicular internet access.	db/conf/mobicom/mobicom2012.html#CrepaldiBESJBK12
2479001	Xinyu_Zhang,Kang_G._Shin	2011	A case for the coexistence of heterogeneous wireless networks.	db/conf/mobicom/s3-2011.html#ZhangS11a
2479016	Ravi_Kokku,Rajesh_Mahindra,Honghai_Zhang,Sampath_Rangarajan	2010	NVS: a virtualization substrate for WiMAX networks.	db/conf/mobicom/mobicom2010.html#KokkuMZR10
2479018	Victoria_Manfredi,Mark_Crovella,Jim_Kurose	2011	Understanding stateful vs stateless communication strategies for ad hoc networks.	db/conf/mobicom/mobicom2011.html#ManfrediCK11
2479020	Shinya_Yamamura,Akira_Nagata,Masato_Tsuru	2011	Towards the trustable global information logistics infrastructure.	db/conf/mobicom/chants2011.html#YamamuraNT11
2479022	Xuetao_Wei,Lorenzo_Gomez,Iulian_Neamtiu,Michalis_Faloutsos	2012	ProfileDroid: multi-layer profiling of android applications.	db/conf/mobicom/mobicom2012.html#WeiGNF12
2479041	Craig_Partridge,Robert_Walsh,Matthew_Gillen,Gregory_Lauer,John_Lowry,W._Timothy_Strayer,Derrick_Kong,David_Levin,Joseph_P._Loyall,Michael_Paulitsch	2012	A secure content network in space.	db/conf/mobicom/chants2012.html#PartridgeWGLLSK12
2479048	Michael_Doering,gel,Lars_C._Wolf	2010	DTN routing in urban public transport systems.	db/conf/mobicom/chants2010.html#DoeringPW10
2479052	Daniel_Irwin,Hrishikesh_Venkataraman,Gabriel-Miro_Muntean	2012	An energy-efficient architecture for multi-hop communication between rovers and satellites in extra-terrestrial surfaces.	db/conf/mobicom/mobicom2012.html#IrwinVM12
2479090	Lei_Yang_0020,Ben_Y._Zhao,Haitao_Zheng	2010	The spaces between us: setting and maintaining boundaries in wireless spectrum access.	db/conf/mobicom/mobicom2010.html#YangZZ10
2479092	Agoston_Petz,Anders_Lindgren,Pan_Hui,Christine_Julien	2012	MADServer: a server architecture for mobile advanced delivery.	db/conf/mobicom/chants2012.html#PetzLHJ12
2479097	Zhen_Wang,Felix_Xiaozhu_Lin,Lin_Zhong,Mansoor_Chishtie	2011	How effective is mobile browser cache?	db/conf/mobicom/s3-2011.html#WangLZC11
2479100	John_Whitbeck,Vania_Conan,Marcelo_Dias_de_Amorim	2010	Critical analysis of encounter traces.	db/conf/mobicom/s3-2010.html#WhitbeckCA10
2479101	Samuel_David_Perli,Nabeel_Ahmed,Dina_Katabi	2010	PixNet: interference-free wireless links using LCD-camera pairs.	db/conf/mobicom/mobicom2010.html#PerliAK10
2479107	Samo_Grasic,Elwyn_Davies,Anders_Lindgren,Avri_Doria	2011	The evolution of a DTN routing protocol - PRoPHETv2.	db/conf/mobicom/chants2011.html#GrasicDLD11
2479117	Michel_Ferreira,Ricardo_Fernandes,o,Wantanee_Viriyasitavat,Ozan_K._Tonguz	2010	Self-organized traffic control.	db/conf/mobicom/vanet2010.html#FerreiraFCVT10
2479122	Kiran_K._Rachuri,Cecilia_Mascolo	2011	Smart phone based systems for social psychological research: challenges and design guidelines.	db/conf/mobicom/s3-2011.html#RachuriM11
2479136	William_L._Van_Besien	2010	Dynamic, non-interactive key management for the bundle protocol.	db/conf/mobicom/chants2010.html#Besien10
2479142	Eugene_Chai,Jeongkeun_Lee,Sung-Ju_Lee,l_H._Etkin,Kang_G._Shin	2012	Building efficient spectrum-agile devices for dummies.	db/conf/mobicom/mobicom2012.html#ChaiLLES12
2479149	Xi_Liu,Anmol_Sheth,Michael_Kaminsky,Konstantina_Papagiannaki,Srinivasan_Seshan,Peter_Steenkiste	2010	Pushing the envelope of indoor wireless spatial reuse using directional access points and clients.	db/conf/mobicom/mobicom2010.html#LiuSKPSS10
2479166	Ã©,Dennis_Goeckel,Don_Towsley	2010	Optimal forwarding strategies for the relay channel under average delay constraints.	db/conf/mobicom/s3-2010.html#MenascheGT10
2479169	Cen_B._Liu,Bahareh_Sadeghi,Edward_W._Knightly	2011	Enabling vehicular visible light communication (V2LC) networks.	db/conf/mobicom/vanet2011.html#LiuSK11
2479180	Hang_Yu,Lin_Zhong,Ashutosh_Sabharwal,David_T._H._Kao	2011	Beamforming on mobile devices: a first study.	db/conf/mobicom/mobicom2011.html#YuZSK11
2479190	Michael_Doering,gel,ttner,Lars_C._Wolf	2010	A new mobility trace for realistic large-scale simulation of bus-based DTNs.	db/conf/mobicom/chants2010.html#DoeringPPW10
2479204	Erran_L._Li,Kun_Tan,Harish_Viswanathan,Ying_Xu,Yang_Richard_Yang	2010	Retransmission != repeat: simple retransmission permutation can resolve overlapping channel collisions.	db/conf/mobicom/mobicom2010.html#LiTVXY10
2479208	Sourjya_Bhaumik,Shoban_Preeth_Chandrabose,Manjunath_Kashyap_Jataprolu,Gautam_Kumar,Anand_Muralidhar,Paul_A._Polakos,Vikram_Srinivasan,Thomas_Woo	2012	CloudIQ: a framework for processing base stations in a data center.	db/conf/mobicom/mobicom2012.html#BhaumikCJKMPSW12
2479212	Elmar_Schoch,Boto_Bako,Stefan_Dietzel,Frank_Kargl	2010	Dependable and secure geocast in vehicular networks.	db/conf/mobicom/vanet2010.html#SchochBDK10
2479214	Oscar_Bejarano,Stanislav_Miskovic,Ehsan_Aryafar,Edward_W._Knightly	2010	TFA: a large scale urban mesh network for social and network research.	db/conf/mobicom/s3-2010.html#BejaranoMAK10
2479217	Adel_Aziz,Julien_Herzen,Ruben_Merz,Seva_Shneer,Patrick_Thiran	2011	explore: an adaptive algorithm to maximize the utility of wireless networks.	db/conf/mobicom/mobicom2011.html#AzizHMST11
2479219	Panayiotis_Kolios,Vasilis_Friderikos,Katerina_Papadaki_0001	2010	Store carry and forward relay aided cellular networks.	db/conf/mobicom/vanet2010.html#KoliosFP10
2479229	Davide_Zanetti,Boris_Danev,Srdjan_Capkun	2010	Physical-layer identification of UHF RFID tags.	db/conf/mobicom/mobicom2010.html#ZanettiDC10
2479241	Mathias_Baur,Matthew_Fullerton,Fritz_Busch	2010	Realizing an effective and flexible Car2X evaluation strategy through modular and multi-scaled traffic simulation.	db/conf/mobicom/vanet2010.html#BaurFB10
2479247	Noriyuki_Suzuki,Jane_Louie_Fresco_Zamora,Shigeru_Kashihara,Suguru_Yamaguchi	2012	Using SOS message propagation to estimate the location of immobilized persons.	db/conf/mobicom/mobicom2012.html#SuzukiZKY12
2479249	Brenton_Walker,Masato_Tsuru,Armando_Caro,nen,rg_Ott,inen,Shinya_Yamamura,Akira_Nagata	2010	The state of DTN evaluation.	db/conf/mobicom/chants2010.html#WalkerTCKOKYN10
2479252	Yong_Li_0008,Guolong_Su,Pan_Hui,Depeng_Jin,Li_Su,Lieguang_Zeng	2011	Multiple mobile data offloading through delay tolerant networks.	db/conf/mobicom/chants2011.html#LiSHJSZ11
2479254	Jason_J._Haas,Yih-Chun_Hu,Nicola_Laurenti	2011	Low-cost mitigation of privacy loss due to radiometric identification.	db/conf/mobicom/vanet2011.html#HaasHL11
2479255	Jungwook_Choi,Hyukjoon_Lee	2010	Supporting handover in an IEEE 802.11p-based wireless access system.	db/conf/mobicom/vanet2010.html#ChoiL10
2479262	inen,nen,rg_Ott	2012	Enabling ad-hoc-style communication in public WLAN hot-spots.	db/conf/mobicom/chants2012.html#KarkkainenPO12
2479270	Chris_Y._T._Ma,David_K._Y._Yau,Nung_Kwan_Yip,Nageswara_S._V._Rao	2010	Privacy vulnerability of published anonymous mobility traces.	db/conf/mobicom/mobicom2010.html#MaYYR10
2479283	Domenico_Giustiniano,Eduard_Goma_Llairo,pez_Toledo,Ian_Dangerfield,n_David_Morillo-Pozo,Pablo_Rodriguez	2010	Fair WLAN backhaul aggregation.	db/conf/mobicom/mobicom2010.html#GiustinianoLTDMR10
2479320	Joseph_David_Camp,Onur_Altintas,Rama_Vuyyuru,Dinesh_Rajan	2011	Context-aware collection, decision, and distribution (C2D2) engine for multi-dimensional adaptation in vehicular networks.	db/conf/mobicom/vanet2011.html#CampAVR11
2479321	ttner,Lars_Christian_Wolf	2012	Flow control mechanisms for the bundle protocol in IEEE 802.15.4 low-power networks.	db/conf/mobicom/chants2012.html#PottnerW12
2479346	Brenton_Walker	2010	Making bundle protocol into a game.	db/conf/mobicom/chants2010.html#Walker10
2479357	Chi-Yu_Li,Chunyi_Peng,Songwu_Lu,Xinbing_Wang	2012	Energy-based rate adaptation for 802.11n.	db/conf/mobicom/mobicom2012.html#LiPLW12
2479360	Gleneesha_M._Johnson_Williams,Brenton_D._Walker,Angela_Hennessy	2012	A performance comparison of DTN bundle protocol implementations on resource constrained nodes.	db/conf/mobicom/chants2012.html#WilliamsWH12
2479378	An_(Jack)_Chan,Amit_Pande,Eilwoo_Baik,Prasant_Mohapatra	2012	Temporal quality assessment for mobile videos.	db/conf/mobicom/mobicom2012.html#ChanPBM12
2479380	Shravan_K._Rayanchu,Vivek_Shrivastava,Suman_Banerjee,Ranveer_Chandra	2011	FLUID: improving throughputs in enterprise wireless lans through flexible channelization.	db/conf/mobicom/mobicom2011.html#RayanchuSBC11
2479385	Zengbin_Zhang,Xia_Zhou,Weile_Zhang,Yuanyang_Zhang,Gang_Wang,Ben_Y._Zhao,Haitao_Zheng	2011	I am the antenna: accurate outdoor AP location using smartphones.	db/conf/mobicom/mobicom2011.html#ZhangZZZWZZ11
2479386	Eugenio_Giordano,Raphael_Frank,Giovanni_Pau,Mario_Gerla	2010	CORNER: a step towards realistic simulations for VANET.	db/conf/mobicom/vanet2010.html#GiordanoFPG10
2479396	Felix_Schmidt-Eisenlohr,Hannes_Hartenstein	2010	Simulation-based capacity estimates for local broadcast transmissions.	db/conf/mobicom/vanet2010.html#Schmidt-EisenlohrH10
2609782	Jiakang_Lu,Tamim_I._Sookoor,Vijay_Srinivasan,Ge_Gao,Brian_Holben,John_A._Stankovic,Eric_Field,Kamin_Whitehouse	2010	The smart thermostat: using occupancy sensors to save energy in homes.	db/conf/sensys/sensys2010.html#LuSSGHSFW10
2609786	Hiroki_Okui,Makoto_Suzuki,Doo_Hwan_Lee,Shigemi_Ishida,Hiroyuki_Morikawa	2012	Preambleless TDD/TDMA OFDM system for real-time wireless control networks.	db/conf/sensys/sensys2012.html#OkuiSLIM12
2609791	Lin-Shung_Huang,Feng-Tso_Sun,Pei_Zhang	2010	TouchAble: a camera-based multitouch system.	db/conf/sensys/sensys2010.html#HuangSZ10
2609800	Julien_Beaudaux,Antoine_Gallais,Romain_Kuntz,Julien_Montavont,l,Damien_Roth,Fabrice_Theoleyre,Erkan_Valentin	2010	CASINO: creating alea with a sensor-based interactive network.	db/conf/sensys/sensys2010.html#BeaudauxGKMNRTV10
2609807	Liang_He,Yu_Gu_0001,Tian_He	2012	Energy synchronized charging in sensor networks.	db/conf/sensys/sensys2012.html#He0H12
2609808	Mayank_Jain,Jung_Il_Choi,Kannan_Srinivasan,Siddharth_Seth,Philip_Levis,Sachin_Katti	2011	Single channel, full-duplex wireless.	db/conf/sensys/sensys2011.html#JainCSSLK11
2609818	Yu-Seung_Ma,Junkeun_Song,Ji-Young_Kwak,Misun_Yu,Duk-Kyun_Woo,Pyungsoo_Mah	2010	RealSSim: a simulator for indoor sensor network systems.	db/conf/sensys/sensys2010.html#MaSKYWM10
2609819	Timothy_W._Hnat,Vijay_Srinivasan,Jiakang_Lu,Tamim_I._Sookoor,Raymond_Dawson,John_A._Stankovic,Kamin_Whitehouse	2011	The hitchhiker's guide to successful residential sensing deployments.	db/conf/sensys/sensys2011.html#HnatSLSDSW11
2609824	Olaf_Landsiedel,Mikael_Johansson	2010	Towards a life without link estimation.	db/conf/sensys/sensys2010.html#LandsiedelJ10
2609829	Tsung-Te_Lai,Tiffany_Yu-Han_Chen,Polly_Huang,Hao-Hua_Chu	2010	PipeProbe: a mobile sensor droplet for mapping hidden pipeline.	db/conf/sensys/sensys2010.html#LaiCHC10
2609831	sterlind,Adam_Dunkels,Raimondas_Sasnauskas,Oscar_Soria_Dustmann,Klaus_Wehrle	2010	Integrating symbolic execution with sensornet simulation for efficient bug finding.	db/conf/sensys/sensys2010.html#OsterlindDSDW10
2609834	nos_Sallai,deczi,lgyesi	2011	Acoustic shooter localization with a minimal number of single-channel wireless sensor nodes.	db/conf/sensys/sensys2011.html#SallaiLV11
2609836	Dennis_J._A._Bijwaard,Wouter_A._P._van_Kleunen,Paul_J._M._Havinga,Leon_Kleiboer,Mark_J._J._Bijl	2011	Industry: using dynamic WSNs in smart logistics for fruits and pharmacy.	db/conf/sensys/sensys2011.html#BijwaardKHKB11
2609837	Karthik_Dantu,Bryan_Kate,Jason_Waterman,Peter_Bailis,Matt_Welsh	2011	Programming micro-aerial vehicle swarms with karma.	db/conf/sensys/sensys2011.html#DantuKWBW11
2609846	Woo_Suk_Lee,Bodhi_Priyantha,Ted_Hart,Gerald_DeJean,Yan_Xu,Jie_Liu	2012	The CLEO mobile sensing platform.	db/conf/sensys/sensys2012.html#LeePHDXL12
2609848	Bram_Dil,Paul_J._M._Havinga	2011	Stochastic radio interferometric positioning in the 2.4 GHz range.	db/conf/sensys/sensys2011.html#DilH11
2609851	Gerald_Stanje,Paul_Miller,Jianxun_Zhu,Alexander_Smith,Olivia_Winn,Robert_Margolies,Maria_Gorlatova,John_Sarik,Marcin_Szczodrak,Baradwaj_Vigraham,Luca_P._Carloni,Peter_R._Kinget,Ioannis_Kymissis,Gil_Zussman	2011	Organic solar cell-equipped energy harvesting active networked tag (EnHANT) prototypes.	db/conf/sensys/sensys2011.html#StanjeMZSWMGSSVCKKZ11
2609854	Pengfei_Zhou,Yuanqing_Zheng,Zhenjiang_Li,Mo_Li,Guobin_Shen	2012	IODetector: a generic service for indoor outdoor detection.	db/conf/sensys/sensys2012.html#ZhouZLLS12
2609856	Yuanchao_Shu,Jiming_Chen,Fachang_Jiang,Yu_Gu_0001,Zhiyu_Dai,Tian_He	2011	WISP-based access control combining electronic and mechanical authentication.	db/conf/sensys/sensys2011.html#ShuCJGDH11
2609859	Hieu_Khac_Le,Dong_Wang,Hossein_Ahmadi,Md._Yusuf_Sarwar_Uddin,Boleslaw_K._Szymanski,Raghu_K._Ganti,Tarek_F._Abdelzaher	2011	Distilling likely truth from noisy streaming data with Apollo.	db/conf/sensys/sensys2011.html#LeWAUSGA11
2609864	Nicolas_Tsiftes,Adam_Dunkels	2011	A database in every sensor.	db/conf/sensys/sensys2011.html#TsiftesD11
2609865	Varick_L._Erickson,Alberto_E._Cerpa	2012	Thermovote: participatory sensing for efficient building HVAC conditioning.	db/conf/sensys/buildsys2012.html#EricksonC12
2609869	Gowtham_Bellala,Manish_Marwah,Amip_Shah,Martin_F._Arlitt,Cullen_Bash	2012	A finite state machine-based characterization of building entities for monitoring and control.	db/conf/sensys/buildsys2012.html#BellalaMSAB12
2609874	Jingjing_Zhang,Rui_Wang_0013,Shilong_Lu,Jibing_Gong,Ze_Zhao,Haiming_Chen,Li_Cui,Nanyue_Wang,Youhua_Yu	2011	EasiCPRS: design and implementation of a portable Chinese pulse-wave retrieval system.	db/conf/sensys/sensys2011.html#ZhangWLGZCCWY11
2609877	Alan_Marchiori,Qi_Han,William_C._Navidi,Lieko_Earle	2012	Building the case for automated building energy management.	db/conf/sensys/buildsys2012.html#MarchioriHNE12
2609885	Varick_L._Erickson,Alberto_E._Cerpa	2010	Occupancy based demand response HVAC control strategy.	db/conf/sensys/buildsys2010.html#EricksonC10
2609887	A._B._M._Musa,Jakob_Eriksson	2012	Tracking unmodified smartphones using wi-fi monitors.	db/conf/sensys/sensys2012.html#MusaE12
2609902	Flavio_Fabbri,Chiara_Buratti,Cengiz_Gezer,Paolo_Toppan,Andrea_Toppan,Roberto_Verdone	2010	Enhancing wi-fi coverage through ZigBee mesh network of energy scan devices.	db/conf/sensys/sensys2010.html#FabbriBGTTV10
2609903	Maria_A._Kazandjieva,Omprakash_Gnawali,Philip_Levis	2010	Visualizing sensor network data with Powertron.	db/conf/sensys/sensys2010.html#KazandjievaGL10
2609904	Sunkara_Vinodh_Kumar,Vlado_Handziski	2012	TWIST Actu: a RESTful testbed platform for remote experimentation with building automation sensors and actuators.	db/conf/sensys/buildsys2012.html#KumarH12
2609906	Z._Cihan_Taysi,vensan,Tommaso_Melodia	2010	TinyEARS: spying on house appliances with audio sensor nodes.	db/conf/sensys/buildsys2010.html#TaysiGM10
2609907	Andrew_Krioukov,Stephen_Dawson-Haggerty,Linda_Lee,Omar_Rehmane,David_E._Culler	2011	A living laboratory study in personalized automated lighting controls.	db/conf/sensys/buildsys2011.html#KrioukovDLRC11
2609916	Du_Li,Bharathan_Balaji,Yifei_Jiang,Kshitiz_Singh	2012	A wi-fi based occupancy sensing approach to smart energy in commercial office buildings.	db/conf/sensys/buildsys2012.html#LiBJS12
2609920	Vinaitheerthan_Sundaram,Patrick_Th._Eugster,Xiangyu_Zhang	2010	Efficient diagnostic tracing for wireless sensor networks.	db/conf/sensys/sensys2010.html#SundaramEZ10
2609921	Ian_Rose,Matt_Welsh	2010	Mapping the urban wireless landscape with Argos.	db/conf/sensys/sensys2010.html#RoseW10
2609935	JeongGil_Ko,Jongjun_Park,Jong_Arm_Jun,Naesoo_Kim	2012	Just send me the summary!: analyzing sensor data for accurate summary reports in indoor environments.	db/conf/sensys/sensys2012.html#KoPJK12
2609938	Prabal_Dutta,Stephen_Dawson-Haggerty,Yin_Chen,Chieh-Jan_Mike_Liang,Andreas_Terzis	2010	Design and evaluation of a versatile and efficient receiver-initiated link layer for low-power wireless.	db/conf/sensys/sensys2010.html#DuttaDCLT10
2609939	Md_Anindya_Prodhan,Kamin_Whitehouse	2012	Hot water DJ: saving energy by pre-mixing hot water.	db/conf/sensys/buildsys2012.html#ProdhanW12
2609942	Long_Cheng,Yu_Gu_0001,Tian_He,Jianwei_Niu	2012	Dynamic switching-based reliable flooding in low-duty-cycle wireless sensor networks.	db/conf/sensys/sensys2012.html#Cheng0HN12
2609946	Jing_Li,Jin_He,Anish_Arora	2011	ThermoNet: fine-grain building comfort-efficiency assessment.	db/conf/sensys/buildsys2011.html#LiHA11
2609947	Ye-Sheng_Kuo,Pat_Pannuto,Thomas_Schmid,Prabal_Dutta	2012	Reconfiguring the software radio to improve power, price, and portability.	db/conf/sensys/sensys2012.html#KuoPSD12
2609951	Jongsoo_Jeong,Haeyong_Kim,Gyusang_Shin,Seontae_Kim	2011	Click based IP border router for low-power and lossy networks.	db/conf/sensys/sensys2011.html#JeongKSK11
2609953	Alan_Marchiori,Qi_Han	2010	Distributed wireless control for building energy management?	db/conf/sensys/buildsys2010.html#MarchioriH10
2609957	Kui_Zhang,Nirvana_Meratnia,Paul_J._M._Havinga,Peng_Guo	2010	Fast alarm broadcasting in critical event monitoring using wireless sensor networks.	db/conf/sensys/sensys2010.html#ZhangMHG10
2609971	Qiang_Liu,Ze_Zhao,Li_Cui	2010	A versatile heterogeneous sensor networks testbed.	db/conf/sensys/sensys2010.html#LiuZC10
2609980	Jie_Liu,Bodhi_Priyantha,Ted_Hart,Heitor_S._Ramos,Antonio_Alfredo_Ferreira_Loureiro,Qiang_Wang	2012	Energy efficient GPS sensing with cloud offloading.	db/conf/sensys/sensys2012.html#LiuPHRLW12
2609981	Daniele_Puccinelli,Silvia_Giordano,Marco_Zuniga,n	2012	Broadcast-free collection protocol.	db/conf/sensys/sensys2012.html#PuccinelliGZM12
2609982	Sreejaya_Viswanathan,Binbin_Chen,Hoang_Hai_Nguyen,Jerry_T._Chiang,Deokwoo_Jung,David_K._Y._Yau	2012	Using anisotropic magnetoresistive (AMR) sensor arrays for electric sub-metering.	db/conf/sensys/sensys2012.html#ViswanathanCNCJY12
2609990	Hong_Lu,Jun_Yang,Zhigang_Liu,Nicholas_D._Lane,Tanzeem_Choudhury,Andrew_T._Campbell	2010	The Jigsaw continuous sensing engine for mobile phone applications.	db/conf/sensys/sensys2010.html#LuYLLCC10
2609991	Marcelo_Martins,Rodrigo_Fonseca,Thomas_Schmid,Prabal_Dutta	2010	Network-wide energy profiling of CTP.	db/conf/sensys/sensys2010.html#MartinsFSD10
2610001	sching,Ulf_Kulau,Lars_C._Wolf	2011	INGA: an inexpensive node for general applications.	db/conf/sensys/sensys2011.html#BuschingKW11
2610008	Pengfei_Zhou,Yuanqing_Zheng,Zhenjiang_Li,Mo_Li,Guobin_Shen	2012	IODetector: a generic service for indoor outdoor detection.	db/conf/sensys/sensys2012.html#ZhouZLLS12a
2610009	Frank_Mokaya,Brian_Nguyen,Cynthia_Kuo,Quinn_Jacobson,Pei_Zhang	2012	[MARS] a real time motion capture and muscle fatigue monitoring tool.	db/conf/sensys/sensys2012.html#MokayaNKJZ12
2610016	Alan_McGibney,Davide_Pusceddu,Susan_Rea,Dirk_Pesch,Marco_Geron,Marcus_Keane	2012	A methodology for sensor modeling and placement optimization to support temperature monitoring.	db/conf/sensys/buildsys2012.html#McGibneyPRPGK12
2610038	Alex_Rogers,Reuben_Wilcock,Siddhartha_Ghosh,Nicholas_R._Jennings	2012	A scalable low-cost solution to provide personalized home heating advice to households.	db/conf/sensys/buildsys2012.html#RogersWGJ12
2610041	Jeonghoon_Kang,Jaechul_Kim,Du-Hwan_Yeo,Jongmin_Hyun,Pil-Mhan_Jung,Taejoon_Choi,Kooklae_Jo,Hangyeol_Kim,Su_Chang_Lee,Sukun_Kim	2012	PEAKSAVE: energy monitoring service.	db/conf/sensys/sensys2012.html#KangKYHJCJKLK12a
2610047	Kyle_Anderson,SangHyun_Lee,Carol_C._Menassa	2012	Effect of social network type on building occupant energy use.	db/conf/sensys/buildsys2012.html#AndersonLM12
2610052	Ting_Zhu,Aditya_Kumar_Mishra,David_E._Irwin,Navin_Sharma,Prashant_J._Shenoy,Donald_F._Towsley	2011	The case for efficient renewable energy management in smart homes.	db/conf/sensys/buildsys2011.html#ZhuMISST11
2610056	Carl_Ellis,James_Scott,Mike_Hazas,John_Krumm	2012	EarlyOff: using house cooling rates to save energy.	db/conf/sensys/buildsys2012.html#EllisSHK12
2610059	Marco_Zahner,David_Barras,Oliver_Lauer,hlich	2011	Impulse radio UWB testbed for indoor and sensor network applications.	db/conf/sensys/sensys2011.html#ZahnerBLF11
2610068	Emre_Ertin,Andrew_Raij,Nathan_Stohs,Mustafa_al'Absi,Santosh_Kumar,Somnath_Mitra	2011	An unobtrusively wearable sensor suite for inferring the onset, causality, and consequences of stress in the field.	db/conf/sensys/sensys2011.html#ErtinRSaKM11
2610073	Vladimir_Dyo,Stephen_A._Ellwood,David_W._Macdonald,Andrew_Markham,Cecilia_Mascolo,sztor,Salvatore_Scellato,Niki_Trigoni,Ricklef_Wohlers,Kharsim_Yousef	2010	Evolution and sustainability of a wildlife monitoring sensor network.	db/conf/sensys/sensys2010.html#DyoEMMMPSTWY10
2610074	Bernhard_Firner,Robert_S._Moore,Richard_E._Howard,Richard_P._Martin,Yanyong_Zhang	2011	Smart buildings, sensor networks, and the Internet of Things.	db/conf/sensys/sensys2011.html#FirnerMHMZ11
2610079	Chengjie_Zhang,Affan_A._Syed,Young_Cho,John_S._Heidemann	2011	Steam-powered sensing.	db/conf/sensys/sensys2011.html#ZhangSCH11
2610083	Nils_Aschenbruck,Jan_Bauer,Raphael_Ernst,Christoph_Fuchs,Jonathan_Kirchhoff	2011	Deploying a mesh-based command and control sensing system in a disaster area maneuver.	db/conf/sensys/sensys2011.html#AschenbruckBEFK11
2610084	S._Kailaswar,R._Zheng,J._Kovitz,Q._Phung,H._Wang,Z._Ding,G._Song	2012	ConcreteCom: a new communication paradigm for building structural health monitoring.	db/conf/sensys/buildsys2012.html#KailaswarZKPWDS12
2610085	Liangyin_Chen,Shuo_Guo,Yuanchao_Shu,Fan_Zhang,Yu_Gu_0001,Jiming_Chen,Tian_He	2011	Selective reference mechanism for neighbor discovery in low-duty-cycle wireless sensor networks.	db/conf/sensys/sensys2011.html#ChenGSZGCH11
2610088	Yun_Cheng,Kaifei_Chen,Ben_Zhang,Chieh-Jan_Mike_Liang,Xiaofan_Jiang,Feng_Zhao	2012	Accurate real-time occupant energy-footprinting in commercial buildings.	db/conf/sensys/buildsys2012.html#ChengCZLJZ12
2610090	Younghun_Kim,Rahul_Balani,Han_Zhao,Mani_B._Srivastava	2010	Granger causality analysis on IP traffic and circuit-level energy monitoring.	db/conf/sensys/buildsys2010.html#KimBZS10
2610096	Kenichi_Yasukata,Tetsuro_Horikawa,Michio_Honda,Hideyuki_Tokuda	2012	Reducing energy consumption with batched task executions.	db/conf/sensys/sensys2012.html#YasukataHHT12
2610097	Taiwoo_Park,Bupjae_Lee,Seokyoung_Song,Uichin_Lee,Junehwa_Song	2012	Supporting posture-free gameplay for motion-based mobile games.	db/conf/sensys/sensys2012.html#ParkLSLS12
2610103	Yu_Liu_0002,Jianzhong_Li,Hong_Gao,Shengfei_Shi	2010	Data-enriched simulation of data management applications for wireless sensor networks.	db/conf/sensys/sensys2010.html#YuLGS10
2610105	Federico_Ferrari,Marco_Zimmerling,Luca_Mottola,Lothar_Thiele	2012	Low-power wireless bus.	db/conf/sensys/sensys2012.html#FerrariZMT12
2610108	Obaid_Salikeen,Junaid_Ansari,Xi_Zhang,nen	2010	Enabling flexible MAC protocol design for wireless sensor networks.	db/conf/sensys/sensys2010.html#SalikeenAZM10
2610113	Masahiro_Ono,Wesley_Graybill,Brian_C._Williams	2012	Risk-sensitive plan execution for connected sustainable home.	db/conf/sensys/buildsys2012.html#OnoGW12
2610118	Daniele_Puccinelli,Omprakash_Gnawali,SunHee_Yoon,Silvia_Giordano,Leonidas_J._Guibas	2010	END: a topology-aware collection metric for sensor networks.	db/conf/sensys/sensys2010.html#PuccinelliGYGG10
2610121	Jian_Cui,Guodong_Sun,Bin_Xu_0001	2011	AD-Sense: activity-driven sensing for mobile devices.	db/conf/sensys/sensys2011.html#CuiSX11
2610123	Wei_Liu,Limin_Sun,Yunhuai_Liu,Hongsong_Zhu,Ziguo_Zhong,Tian_He	2012	Exploiting ephemeral link correlation for mobile wireless networks.	db/conf/sensys/sensys2012.html#LiuSLZZH12
2610126	David_Gugelmann,Philipp_Sommer,Roger_Wattenhofer	2010	Reliable and energy-efficient bulk-data dissemination in wireless sensor networks.	db/conf/sensys/sensys2010.html#GugelmannSW10
2610130	Deokwoo_Jung,Hoang_Hai_Nguyen,Sreejaya_Viswanathan,Binbin_Chen,David_K._Y._Yau	2012	Scalable load disaggregation system using distributed electrical signature detection.	db/conf/sensys/buildsys2012.html#JungNVCY12
2610131	Ye-Sheng_Kuo,Thomas_Schmid,Prabal_Dutta	2010	Hijacking power and bandwidth from the mobile phone's audio interface.	db/conf/sensys/sensys2010.html#KuoSD10
2610138	Chieh-Jan_Mike_Liang,Bodhi_Priyantha,Jie_Liu,Andreas_Terzis	2010	Surviving wi-fi interference in low power ZigBee networks.	db/conf/sensys/sensys2010.html#LiangPLT10
2610150	James_Weimer,Seyed_Alireza_Ahmadi,Araujo,Francesca_Madia_Mele,Dario_Papale,Iman_Shames,Henrik_Sandberg,Karl_Henrik_Johansson	2012	Active actuator fault detection and diagnostics in HVAC systems.	db/conf/sensys/buildsys2012.html#WeimerAAMPSSJ12
2610151	Andrew_Markham,Niki_Trigoni,Stephen_A._Ellwood,David_W._Macdonald	2010	Revealing the hidden lives of underground animals using magneto-inductive tracking.	db/conf/sensys/sensys2010.html#MarkhamTEM10
2610155	Simon_Duquennoy,m,Adam_Dunkels	2011	Snap: rapid sensornet deployment with a sensornet appstore.	db/conf/sensys/sensys2011.html#DuquennoyWD11
2610160	Thanh_Dang,Wu-chi_Feng,Nirupama_Bulusu,Huy_Tran	2011	Zoom: a multi-resolution tasking framework for crowdsourced geo-spatial sensing.	db/conf/sensys/sensys2011.html#DangFBT11
2610165	Xuesong_Liu,Burcu_Akinci,Mario_Berges,James_H._Garrett_Jr.	2012	An integrated performance analysis framework for HVAC systems using heterogeneous data models and building automation systems.	db/conf/sensys/buildsys2012.html#LiuABG12
2610167	Zhen_Song,Lingyun_Wang,Yan_Lu	2012	Social learning SoftThermostat for commercial buildings.	db/conf/sensys/buildsys2012.html#SongWL12
2610168	Martin_Felix_Pichler,scher,Hermann_Schranzhofer,G._D._Kontes,G._I._Giannakis,Elias_B._Kosmatopoulos,D._V._Rovas	2011	Simulation-assisted building energy performance improvement using sensible control decisions.	db/conf/sensys/buildsys2011.html#PichlerDSKGKR11
2610170	A._B._M._Musa,Jakob_Eriksson	2011	WiFlow: real time travel time estimation using wi-fi monitors.	db/conf/sensys/sensys2011.html#MusaE11
2610180	Maulin_Patel,Abby_Enscoe,Satyen_Mukherjee,Matt_Helm	2011	Preliminary results from an advanced lighting controls demonstration at Fort Irwin.	db/conf/sensys/buildsys2011.html#PatelEMH11
2610182	Raja_Jurdak,Peter_Corke,Dhinesh_Dharman,Guillaume_Salagnac	2010	Adaptive GPS duty cycling and radio ranging for energy-efficient localization.	db/conf/sensys/sensys2010.html#JurdakCDS10
2610187	Pravein_Govindan_Kannan,Padmanabha_Venkatagiri_Seshadri,Mun_Choon_Chan,Akkihebbal_L._Ananda,Li-Shiuan_Peh	2012	Low cost crowd counting using audio tones.	db/conf/sensys/sensys2012.html#KannanSCAP12
2610188	Unkyu_Park,John_S._Heidemann	2011	Data muling with mobile phones for sensornets.	db/conf/sensys/sensys2011.html#ParkH11
2610191	Pius_W._Q._Lee,Hwee_Pink_Tan,Mingding_Han	2011	A solar-powered wireless parking guidance system for outdoor car parks.	db/conf/sensys/sensys2011.html#LeeTH11
2610210	Jeonghoon_Kang,Jongmin_Hyun,Dongik_Kim,Kooklae_Jo,Pil_Mhan_Jeong,Taejoon_Choi,Sukun_Kim	2011	Tracking vehicles in a container terminal.	db/conf/sensys/sensys2011.html#KangHKJJCK11
2610216	Christos_Efstratiou,Ilias_Leontiadis,Cecilia_Mascolo,Jon_Crowcroft	2010	A shared sensor network infrastructure.	db/conf/sensys/sensys2010.html#EfstratiouLMC10
2610218	Jian_Qiu,David_Chu,Xiangying_Meng,Thomas_Moscibroda	2011	On the feasibility of real-time phone-to-phone 3D localization.	db/conf/sensys/sensys2011.html#QiuCMM11
2610224	Milan_Milenkovic,Ulf_Hanebutte,Thanh_Dang	2011	POEM - a user-centric approach to energy efficiency in office buildings.	db/conf/sensys/buildsys2011.html#MilenkovicHD11
2610240	Taiwoo_Park,Jinwon_Lee,Inseok_Hwang,Chungkuk_Yoo,Lama_Nachman,Junehwa_Song	2011	E-Gesture: a collaborative architecture for energy-efficient gesture recognition with hand-worn sensor and mobile devices.	db/conf/sensys/sensys2011.html#ParkLHYNS11
2610244	Guy_R._Newsham,Benjamin_J._Birt	2010	Building-level occupancy data to improve ARIMA-based electricity use forecasts.	db/conf/sensys/buildsys2010.html#NewshamB10
2610257	Younghyun_Ju,Youngki_Lee,Jihyun_Yu,Chulhong_Min,Insik_Shin,Junehwa_Song	2012	SymPhoney: a coordinated sensing flow execution engine for concurrent mobile sensing applications.	db/conf/sensys/sensys2012.html#JuLYMSS12
2610263	Xiao_Qin,Susan_Lysecky,Jonathan_Sprinkle	2012	Acomni: an alternative smart thermostat interface to aid end users to visualize energy and cost tradeoffs.	db/conf/sensys/buildsys2012.html#QinLS12
2610266	Deokwoo_Jung,Athanasios_Bamis,Andreas_Savvides	2011	Reliable state transition detection in off-the-shelf low frequency electric meters.	db/conf/sensys/buildsys2011.html#JungBS11
2610271	Johannes_Schmid,deke,Wilhelm_Stork,Heiko_Hennrich,Thomas_Blank	2010	A wireless MEMS-sensor network concept for the condition monitoring of ball screw drives in industrial plants.	db/conf/sensys/sensys2010.html#SchmidGSHB10
2610272	Patrick_Lazik,Anthony_Rowe	2012	Indoor pseudo-ranging of mobile devices using ultrasonic chirps.	db/conf/sensys/sensys2012.html#LazikR12
2610276	Vijay_Srinivasan,John_A._Stankovic,Kamin_Whitehouse	2011	WaterSense: water flow disaggregation using motion sensors.	db/conf/sensys/buildsys2011.html#SrinivasanSW11
2610280	Manchun_Zheng,Jun_Sun_0001,n,Yang_Liu_0003,Jin_Song_Dong,Yu_Gu_0001	2011	Towards bug-free implementation for wireless sensor networks.	db/conf/sensys/sensys2011.html#ZhengSSLDG11
2610286	Berta_Carballido_Villaverde,Julien_Oury,Dirk_Pesch,Rodolfo_de_Paz_Alberola,Szymon_Fedor	2012	Commissioning of low power embedded devices with IPv6/CoAP.	db/conf/sensys/sensys2012.html#VillaverdeOPAF12
2610287	Ran_Yu,Bin_Xu_0001,Guodong_Sun,Zheng_Yang	2010	Whistle: synchronization-free TDOA for localization.	db/conf/sensys/sensys2010.html#YuXSY10
2610292	Nils_Aschenbruck,Jan_Bauer,Raphael_Ernst,Christoph_Fuchs,Jonathan_Kirchhoff	2011	A mesh-based command and control sensing system for public safety scenarios.	db/conf/sensys/sensys2011.html#AschenbruckBEFK11a
2610294	Yuvraj_Agarwal,Bharathan_Balaji,Rajesh_E._Gupta,Jacob_Lyles,Michael_Wei,Thomas_Weng	2010	Occupancy-driven energy management for smart building automation.	db/conf/sensys/buildsys2010.html#AgarwalBGLWW10
2610295	Vinaitheerthan_Sundaram,Patrick_Eugster,Xiangyu_Zhang	2012	Prius: generic hybrid trace compression for wireless sensor networks.	db/conf/sensys/sensys2012.html#SundaramEZ12
2610299	Peter_Gilbert,Jaeyeon_Jung,Kyungmin_Lee,Henry_Qin,Daniel_Sharkey,Anmol_Sheth,Landon_P._Cox	2011	YouProve: authenticity and fidelity in mobile sensing.	db/conf/sensys/sensys2011.html#GilbertJLQSSC11
2610301	Yu-Ting_Chen,Ting-Chou_Chien,Pai_H._Chou	2010	Enix: a lightweight dynamic operating system for tightly constrained wireless sensor platforms.	db/conf/sensys/sensys2010.html#ChenCC10
2610308	David_Hasenfratz,Andreas_Meier_0003,Matthias_Woehrle,Marco_Zimmerling,Lothar_Thiele	2010	If you have time, save energy with pull.	db/conf/sensys/sensys2010.html#HasenfratzMWZT10
2610311	Jeonghoon_Kang,Hojung_Lim,Jaechul_Kim,Du-Hwan_Yeo,Pil_Mhan_Jeong,Taejoon_Choi,Dongik_Kim,Wonyoung_Yang,Sukun_Kim	2011	Micro energy efficiency system based on QR code mote.	db/conf/sensys/sensys2011.html#KangLKYJCKYK11
2610318	Thomas_Schmid,David_E._Culler,Prabal_Dutta	2010	Meter any wire, anywhere by virtualizing the voltage channel.	db/conf/sensys/buildsys2010.html#SchmidCD10
2610320	Andong_Zhan,Marcus_Chang,Yin_Chen,Andreas_Terzis	2012	Accurate caloric expenditure of bicyclists using cellphones.	db/conf/sensys/sensys2012.html#ZhanCCT12
2610330	Yanjun_Sun,Sandeep_Bhadra,Soon-Hyeok_Choi,Minghua_Fu,Xiaolin_Lu	2011	Achieving robust sensor networks through close coordination between narrow-band power line and low-power wireless communications.	db/conf/sensys/sensys2011.html#SunBCFL11
2610331	Thomas_Kothmayr,Wen_Hu,Corinna_Schmitt,nig,Georg_Carle	2011	Securing the internet of things with DTLS.	db/conf/sensys/sensys2011.html#KothmayrHSBC11
2610336	Yogesh_L._Simmhan,Viktor_K._Prasanna,Saima_Aman,Sreedhar_Natarajan,Wei_Yin,Qunzhi_Zhou	2011	Toward data-driven demand-response optimization in a campus microgrid.	db/conf/sensys/buildsys2011.html#SimmhanPANYZ11
2610339	Rakshit_Agrawal,Mridu_Atray,S._Krishna_Sundari	2012	Sensor network architecture for soil and weather data extraction and database generation.	db/conf/sensys/sensys2012.html#AgrawalAS12
2610351	Zhibo_Wang,Clayton_Edward_Taylor,Qing_Cao,Hairong_Qi,Zhi_Wang	2011	Friendbook: privacy preserving friend matching based on shared interests.	db/conf/sensys/sensys2011.html#WangTCQW11
2610359	Kenneth_W._Parker,Anish_Arora,Sandip_Bapat	2010	Fine-scale tracking by fusing phase profiles from multiple low-power Doppler radars.	db/conf/sensys/sensys2010.html#ParkerAB10
2610361	Muhammad_Hamad_Alizai,Bernhard_Kirchen,gila_Bitsch_Link,Hanno_Wirtz,Klaus_Wehrle	2010	TinyOS meets wireless mesh networks.	db/conf/sensys/sensys2010.html#AlizaiKLWW10
2610364	me_Rousselot,Jean-Dominique_Decotignie	2010	When ultra low power meets high performance: the WiseMAC high availability protocol.	db/conf/sensys/sensys2010.html#RousselotD10
2610367	Mangesh_Chitnis,Claudio_Salvadori,Matteo_Petracca,Giuseppe_Lipari,Paolo_Pagano	2010	Traffic related observations by line sensing techniques.	db/conf/sensys/sensys2010.html#ChitnisSPLP10
2610370	Bhaskaran_Raman,Kameswari_Chebrolu,Sagar_Bijwe,Vijay_Gabale	2010	PIP: a connection-oriented, multi-hop, multi-channel TDMA-based MAC for high throughput bulk transfer.	db/conf/sensys/sensys2010.html#RamanCBG10
2610371	Kazuhisa_Asakawa,Norihisa_Segawa,Jun_Sawamoto	2010	Proposal for a sensor network application development with ActionScript.	db/conf/sensys/sensys2010.html#AsakawaSS10
2610372	Andrzej_Forys,Jon_Davies,Anh_Luong,Kyeong_T._Min,Enoch_Lee,Thomas_Schmid	2012	Rapid deployable system for human contact network research.	db/conf/sensys/sensys2012.html#ForysDLMLS12
2610375	Sandeep_Bhadra,Soon-Hyeok_Choi,Yanjun_Sun,Xiaolin_Lu	2011	Achieving a 10x lifetime increase with IEEE 802.15.4e motes.	db/conf/sensys/sensys2011.html#BhadraCSL11
2610376	Alie_El-Din_Mady,Gregory_M._Provan,Ning_Wei	2012	Designing cost-efficient wireless sensor/actuator networks for building control systems.	db/conf/sensys/buildsys2012.html#MadyPW12
2610380	Matthew_Tan_Creti,Mohammad_Sajjad_Hossain,Saurabh_Bagchi,Vijay_Raghunathan	2011	Aveksha: a hardware-software approach for non-intrusive tracing and profiling of wireless embedded systems.	db/conf/sensys/sensys2011.html#CretiHBR11
2610381	Prasant_Misra,Mingrui_Yang,Wen_Hu,Sanjay_Jha	2012	A fast gradient projection algorithm for efficient cross-correlation via sparse representation in sensor networks.	db/conf/sensys/sensys2012.html#MisraYHJ12
2610386	Kevin_Deland,Jonathan_Lenchner,John_C._Nelson,Jonathan_Connell,James_Thoensen,Jeffrey_O._Kephart	2011	A robot-in-residence for data center thermal monitoring and energy efficiency management.	db/conf/sensys/sensys2011.html#DelandLNCTK11
2610393	Yao-Jung_Wen,Dennis_DiBartolomeo,Francis_Rubinstein	2011	Co-simulation based building controls implementation with networked sensors and actuators.	db/conf/sensys/buildsys2011.html#WenDR11
2610403	Akito_Ito,Naoya_Namatame,Jin_Nakazawa,Hideyuki_Tokuda	2012	Pattern-based matrix-size optimization algorithm for compressive sensing in real-world wireless sensor networks.	db/conf/sensys/sensys2012.html#ItoNNT12
2610407	JeongGil_Ko,Jongsoo_Jeong,Jongjun_Park,Jong_Arm_Jun,Naesoo_Kim	2012	Towards full RPL interoperability: addressing the case with downwards routing interoperability.	db/conf/sensys/sensys2012.html#KoJPJK12
2610420	Yohan_Chon,Elmurod_Talipov,Hyojeong_Shin,Hojung_Cha	2011	Mobility prediction-based smartphone energy optimization for everyday location monitoring.	db/conf/sensys/sensys2011.html#ChonTSC11
2610427	Marcin_Szczodrak,Luca_P._Carloni	2011	A complete framework for programming event-driven, self-reconfigurable low power wireless networks.	db/conf/sensys/sensys2011.html#SzczodrakC11
2610438	Byungjo_Kim,Jiung_Yu,Hyogon_Kim	2012	In-vivo NFC: remote monitoring of implanted medical devices with improved privacy.	db/conf/sensys/sensys2012.html#KimYK12
2610442	Willy_Bernal,Madhur_Behl,Truong_Nghiem,Rahul_Mangharam	2012	MLE+: design and deployment integration for energy-efficient building controls.	db/conf/sensys/buildsys2012.html#BernalBNM12a
2610443	Shijia_Pan,Bo_Liu,Lin_Zhang,Pei_Zhang	2012	iCEnergy: augmented reality display for intuitive energy monitoring.	db/conf/sensys/sensys2012.html#PanLZZ12
2610445	Christian_Beckel,Leyna_Sadamori,Silvia_Santini	2012	Towards automatic classification of private households using electricity consumption data.	db/conf/sensys/buildsys2012.html#BeckelSS12
2610449	Rijurekha_Sen,Abhinav_Maurya,Bhaskaran_Raman,Rupesh_Mehta,Ramakrishnan_Kalyanaraman,Nagamanoj_Vankadhara,Swaroop_Roy,Prashima_Sharma	2012	None	db/conf/sensys/sensys2012.html#SenMRMKVRS12
2610453	Jinzhi_Han,Zhan_Li,Dingyi_Fang,Na_An,Xiaojiang_Chen,Zhouhu_Deng	2011	Earthen site protection using wireless sensor networks.	db/conf/sensys/sensys2011.html#HanLFACD11
2610461	Christof_Huebner,Stefan_Hanelt,Tino_Wagenknecht,Rachel_Cardell-Oliver,Alvaro_Monsalve	2010	Long range wireless sensor networks using transmit-only nodes.	db/conf/sensys/sensys2010.html#HuebnerHWCM10
2610462	Ankur_Kamthe,Varick_L._Erickson,n,Alberto_Cerpa	2011	Enabling building energy auditing using adapted occupancy models.	db/conf/sensys/buildsys2011.html#KamtheECC11
2610466	Carl_Ellis,James_Scott,Ionut_Constandache,Mike_Hazas	2012	Creating a room connectivity graph of a building from per-room sensor units.	db/conf/sensys/buildsys2012.html#EllisSCH12
2610468	Saumay_Pushp,Chulhong_Min,Youngki_Lee,Chi_Harold_Liu,Junehwa_Song	2012	Towards crowd-aware sensing platform for metropolitan environments.	db/conf/sensys/sensys2012.html#PushpMLLS12
2610470	Lu_Su,Jing_Gao,Yong_Yang,Tarek_F._Abdelzaher,Bolin_Ding,Jiawei_Han	2011	Hierarchical aggregate classification with limited supervision for data reduction in wireless sensor networks.	db/conf/sensys/sensys2011.html#SuGYADH11
2610473	Patrick_Lazik,Anthony_Rowe	2012	Indoor pseudo-ranging of mobile devices using ultrasonic chirps.	db/conf/sensys/sensys2012.html#LazikR12a
2610480	Anthony_Schoofs,Declan_T._Delaney,Gregory_M._P._O'Hare,Antonio_G._Ruzzelli	2011	COPOLAN: non-invasive occupancy profiling for preliminary assessment of HVAC fixed timing strategies.	db/conf/sensys/buildsys2011.html#SchoofsDOR11
2610481	Zhibo_Wang,Zhi_Wang,Honglong_Chen,Jianfeng_Li,Hongbin_Li	2011	HierTrack: an energy efficient target tracking system for wireless sensor networks.	db/conf/sensys/sensys2011.html#WangWCLL11
2610482	Sina_Afshari,Sandipan_Mishra,John_T._Wen,Robert_Karlicek	2012	An adaptive smart lighting system.	db/conf/sensys/buildsys2012.html#AfshariMWK12
2610485	Jun_Yang,Zhigang_Liu	2010	ADACEM: automatic daily activity and calorie expenditure monitor on mobile phones.	db/conf/sensys/sensys2010.html#YangL10
2610487	Carrick_Detweiler,Marek_Doniec,Mingshun_Jiang,Mac_Schwager,Robert_F._Chen,Daniela_Rus	2010	Adaptive decentralized control of underwater sensor networks for modeling underwater phenomena.	db/conf/sensys/sensys2010.html#DetweilerDJSCR10
2610491	Jiakang_Lu,Dagnachew_Birru,Kamin_Whitehouse	2010	Using simple light sensors to achieve smart daylight harvesting.	db/conf/sensys/buildsys2010.html#LuBW10
2610493	Stefano_Tennina,lanie_Bouroche,Ricardo_Gomes,Farrukh_Mirza,rio_Alves,Gabriella_Carrozza	2011	EMMON: a WSN system architecture and toolset for large-scale and dense real-time embedded monitoring.	db/conf/sensys/sensys2011.html#TenninaBGMAC11
2610499	Hyeong-Gon_Jo,Seol-Young_Jeong,Soon-Ju_Kang	2012	Dynamic resource look-up and discovery architecture for indoor location-based service.	db/conf/sensys/buildsys2012.html#JoJK12
2610501	Javed_A._Aslam,Sejoon_Lim,Xinghao_Pan,Daniela_Rus	2012	City-scale traffic estimation from a roving sensor network.	db/conf/sensys/sensys2012.html#AslamLPR12
2610507	Barry_Porter,Utz_Roedig,ani,Geoff_Coulson	2010	The Lorien dynamic component based OS.	db/conf/sensys/sensys2010.html#PorterRTC10
2610531	Octav_Chipara,Chenyang_Lu,Thomas_C._Bailey,Gruia-Catalin_Roman	2010	Reliable clinical monitoring using wireless sensor networks: experiences in a step-down hospital unit.	db/conf/sensys/sensys2010.html#ChiparaLBR10
2610534	James_Biagioni,Tomas_Gerlich,Timothy_Merrifield,Jakob_Eriksson	2011	EasyTracker: automatic transit tracking, mapping, and arrival time prediction using smartphones.	db/conf/sensys/sensys2011.html#BiagioniGME11
2610536	Affan_A._Syed,Young_Cho,John_S._Heidemann	2010	Energy transference for sensornets.	db/conf/sensys/sensys2010.html#SyedCH10
2610538	Claudia_Rinaldi,Luigi_Pomante,Roberto_Alesii,Fabio_Graziosi	2010	RF sounding.	db/conf/sensys/sensys2010.html#RinaldiPAG10
2610544	Vaishakh_Rao,Anthony_Rowe	2011	Low-cost continuous thermal sensing.	db/conf/sensys/buildsys2011.html#RaoR11
2610550	Gabe_Fierro,Omar_Rehmane,Andrew_Krioukov,David_E._Culler	2012	Zone-level occupancy counting with existing infrastructure.	db/conf/sensys/buildsys2012.html#FierroRKC12
2610560	Hiroki_Ishizuka,Shun_Fukumoto,Tatsuhiro_Nishimoto,Ryo_Fukuhara,Tatsuya_Morita,Keiji_Sugo,Niwat_Thepvilojanapong,Shin'ichi_Konomi,Kaoru_Sezaki,Ryosuke_Shibasaki,Yoshito_Tobe	2010	None	db/conf/sensys/sensys2010.html#IshizukaFNFMSTKSST10
2610561	Jeff_Hsu,Prashanth_Mohan,Xiaofan_Jiang,Jorge_Ortiz,Sushant_Shankar,Stephen_Dawson-Haggerty,David_E._Culler	2010	HBCI: human-building-computer interaction.	db/conf/sensys/buildsys2010.html#HsuMJOSDC10
2610567	Faisal_Aslam,Luminous_Fennell,Christian_Schindelhauer,Peter_Thiemann,Zartash_Afzal_Uzmi	2011	Offline GC: trashing reachable objects on tiny devices.	db/conf/sensys/sensys2011.html#AslamFSTU11
2610571	Xiaofan_Jiang,Chieh-Jan_Mike_Liang,Feng_Zhao,Kaifei_Chen,Jeff_Hsu,Ben_Zhang,Jie_Liu	2011	Creating interactive virtual zones in physical space with magnetic-induction.	db/conf/sensys/sensys2011.html#JiangLZCHZL11
2610572	Andrew_Markham,Niki_Trigoni,Stephen_A._Ellwood,David_W._Macdonald	2010	Magneto-inductive tracking of underground animals.	db/conf/sensys/sensys2010.html#MarkhamTEM10a
2610582	JeongGil_Ko,Joakim_Eriksson,Nicolas_Tsiftes,Stephen_Dawson-Haggerty,Jean-Philippe_Vasseur,Mathilde_Durvy,Andreas_Terzis,Adam_Dunkels,David_E._Culler	2011	An interoperability development and performance diagnosis environment.	db/conf/sensys/sensys2011.html#KoETDVD11a
2610585	sterlind,Joakim_Eriksson,Adam_Dunkels	2010	Cooja TimeLine: a power visualizer for sensor network simulation.	db/conf/sensys/sensys2010.html#OsterlindED10
2610587	Thomas_Weng,Bharathan_Balaji,Seemanta_Dutta,Rajesh_K._Gupta,Yuvraj_Agarwal	2011	Managing plug-loads for demand response within buildings.	db/conf/sensys/buildsys2011.html#WengBDGA11
2610595	Olaf_Landsiedel,Federico_Ferrari,Marco_Zimmerling	2012	Capture effect based communication primitives: closing the loop in wireless cyber-physical systems.	db/conf/sensys/sensys2012.html#LandsiedelFZ12
2610596	Ting_Zhu,Yu_Gu_0001,Tian_He,Zhi-Li_Zhang	2010	eShare: a capacitor-driven energy storage and sharing network for long-term operation.	db/conf/sensys/sensys2010.html#ZhuGHZ10
2610601	Pan_Hu,Guobin_Shen,Xiaofan_Jiang,Shao-fu_Shih,Donghuan_Lu,Feng_Zhao,Dezhi_Hong,Qiang_Li,S._M._Shahriar_Nirjon,Robert_F._Dickerson,John_A._Stankovic	2012	Septimu	db/conf/sensys/sensys2012.html#HuSJSLZHLNDS12
2610606	Ryo_Shigeta,Yoshihiro_Kawahara,Tohru_Asami	2011	Capacitor leakage aware duty cycle control for energy harvesting wireless sensor networks.	db/conf/sensys/sensys2011.html#ShigetaKA11
2610607	Stefano_Tennina,Roberto_Alesii,Marco_Di_Renzo,Fortunato_Santucci,Luigi_Pomante,Fabio_Graziosi	2011	Automatic personal identification system for security in critical services: a case study.	db/conf/sensys/sensys2011.html#TenninaARSPG11
2610609	Fiach_Antaw,Branislav_Kusy	2012	ARM-based robot platform for sensor networks.	db/conf/sensys/sensys2012.html#AntawK12
2610611	Sascha_Schnaufer,Thomas_Haenselmann,Wolfgang_Effelsberg	2010	BSMX: message exchange between unassociated WLAN devices.	db/conf/sensys/sensys2010.html#SchnauferHE10
2610618	Gowtham_Bellala,Manish_Marwah,Martin_F._Arlitt,Geoff_Lyon,Cullen_Bash	2011	Towards an understanding of campus-scale power consumption.	db/conf/sensys/buildsys2011.html#BellalaMALB11
2610627	Marcus_Chang,Philippe_Bonnet	2010	Meeting ecologists' requirements with adaptive data acquisition.	db/conf/sensys/sensys2010.html#ChangB10
2610628	Anthony_Rowe,Mario_Berges,Raj_Rajkumar	2010	Contactless sensing of appliance state transitions through variations in electromagnetic fields.	db/conf/sensys/buildsys2010.html#RoweBR10
2610633	Kai_Xing,Tianbo_Gu,Zhengang_Zhao,Yang_Wang_0015,Bowu_Zhang,Yi_Liang,Hao_Wei,Liusheng_Huang	2012	A novel system design and implementation for realtime sensing and warning of roadway hazards round-the-clock.	db/conf/sensys/sensys2012.html#XingGZWZLWH12
2610638	Sonal_Verma,Andrew_Robinson,Prabal_Dutta	2012	AudioDAQ: turning the mobile phone's ubiquitous headset port into a universal data acquisition interface.	db/conf/sensys/sensys2012.html#VermaRD12
2610641	Deokwoo_Jung,Andreas_Savvides	2010	Estimating building consumption breakdowns using ON/OFF state sensing and incremental sub-meter deployment.	db/conf/sensys/sensys2010.html#JungS10
2610655	Yuvraj_Agarwal,Rajesh_K._Gupta,Daisuke_Komaki,Thomas_Weng	2012	BuildingDepot: an extensible and distributed architecture for building data storage, access and sharing.	db/conf/sensys/buildsys2012.html#AgarwalGKW12
2610661	Yin_Chen,Andreas_Terzis	2011	On the implications of the log-normal path loss model: an efficient method to deploy and move sensor motes.	db/conf/sensys/sensys2011.html#ChenT11
2610668	Yang_Wang_0015,Liusheng_Huang,Hongli_Xu,Kai_Xing,Wei_Yang,Gang_Liu	2010	A wifi-based low-cost mobile video surveillance system for dynamic police force deployment and real-time guard for public security.	db/conf/sensys/sensys2010.html#WangHXXYL10
2610671	Laura_Marie_Feeney,Lars_Andersson,Anders_Lindgren,Stina_Starborg,Annika_Ahlberg_Tidblad	2012	Using batteries wisely.	db/conf/sensys/sensys2012.html#FeeneyALST12
2610679	Yuki_Nishida,Yoshihiro_Kawahara,Tohru_Asami	2011	Enhanced collaborative sensing scheme for user activity recognition.	db/conf/sensys/sensys2011.html#NishidaKA11
2610694	Andres_Molina-Markham,Prashant_J._Shenoy,Kevin_Fu,Emmanuel_Cecchet,David_E._Irwin	2010	Private memoirs of a smart meter.	db/conf/sensys/buildsys2010.html#Molina-MarkhamSFCI10
2610698	Donnie_H._Kim,Younghun_Kim,Deborah_Estrin,Mani_B._Srivastava	2010	SensLoc: sensing everyday places and paths using less energy.	db/conf/sensys/sensys2010.html#KimKES10
2610710	JeongGil_Ko,Joakim_Eriksson,Nicolas_Tsiftes,Stephen_Dawson-Haggerty,Jean-Philippe_Vasseur,Mathilde_Durvy,Andreas_Terzis,Adam_Dunkels,David_E._Culler	2011	Industry: beyond interoperability: pushing the performance of sensor network IP stacks.	db/conf/sensys/sensys2011.html#KoETDVD11
2610714	Matthew_Keally,Gang_Zhou,Guoliang_Xing,Jianxin_Wu,Andrew_J._Pyles	2011	PBN: towards practical activity recognition using smartphone-based body sensor networks.	db/conf/sensys/sensys2011.html#KeallyZXWP11
2610716	Hossein_Ahmadi,Nam_Pham,Raghu_K._Ganti,Tarek_F._Abdelzaher,Suman_Nath,Jiawei_Han	2010	Privacy-aware regression modeling of participatory sensing data.	db/conf/sensys/sensys2010.html#AhmadiPGANH10
2610719	Damien_Fay,Kenneth_N._Brown,Liam_O'Toole	2012	Lies, damn lies and preferences: a Gaussian process model for ubiquitous thermal preference trials.	db/conf/sensys/buildsys2012.html#FayBO12
2610721	Simon_Duquennoy,sterlind,Adam_Dunkels	2011	Lossy links, low power, high throughput.	db/conf/sensys/sensys2011.html#DuquennoyOD11
2610722	Georg_Oberholzer,Philipp_Sommer,Roger_Wattenhofer	2010	The SpiderBat ultrasound positioning system.	db/conf/sensys/sensys2010.html#OberholzerSW10
2610732	Emre_Ertin,Nathan_Stohs,Santosh_Kumar,Andrew_Raij,Mustafa_al'Absi,Siddharth_Shah	2011	AutoSense: unobtrusively wearable sensor suite for inferring the onset, causality, and consequences of stress in the field.	db/conf/sensys/sensys2011.html#ErtinSKRaS11
2610736	Zengbin_Zhang,David_Chu,Jian_Qiu,Thomas_Moscibroda	2011	Sword fight with smartphones.	db/conf/sensys/sensys2011.html#ZhangCQM11
2610739	Tim_Kaler,John_Patrick_Lynch,Timothy_Peng,Lenin_Ravindranath,Arvind_Thiagarajan,Hari_Balakrishnan,Samuel_Madden	2010	Code in the air: simplifying sensing on smartphones.	db/conf/sensys/sensys2010.html#KalerLPRTBM10
2610741	Christof_Baumann,Stephan_Holzer,Miguel_Rodriguez,Roger_Wattenhofer	2012	Smart energy case study.	db/conf/sensys/buildsys2012.html#BaumannHRW12
2610744	Joern_Ploennigs,Burkhard_Hensel,Klaus_Kabitzsch	2010	Wireless, collaborative virtual sensors for thermal comfort.	db/conf/sensys/buildsys2010.html#PloennigsHK10
2610748	Blake_Newman,Joshua_Sanders,Riley_Hughes,Raja_Jurdak	2010	TinyTune, a collaborative sensor network musical instrument.	db/conf/sensys/sensys2010.html#NewmanSHJ10
2610752	Jilong_Liao,Qing_Cao	2011	Uno: a sharing infrastructure for smartphone sensors and files.	db/conf/sensys/sensys2011.html#LiaoC11
2610753	Jung-Hyun_Jun,Long_Cheng,Jun_Sun_0001,Yu_Gu_0001,Ting_Zhu,Tian_He	2012	Improving indoor localization with social interactions.	db/conf/sensys/sensys2012.html#JunCS0ZH12
2610757	Shinji_Motegi,Yasutaka_Nishimura,Kiyohito_Yoshihara	2011	Node placement adviser for sensor network deployment.	db/conf/sensys/sensys2011.html#MotegiNY11
2610761	Desheng_Zhang,Tian_He,Yunhuai_Liu,Yu_Gu_0001,Fan_Ye,Raghu_K._Ganti	2011	Neighbor discovery with distributed quorum system.	db/conf/sensys/sensys2011.html#ZhangHLGYG11
2610784	Abhinandan_Majumdar,David_H._Albonesi,Pradip_Bose	2012	Energy-aware meeting scheduling algorithms for smart buildings.	db/conf/sensys/buildsys2012.html#MajumdarAB12
2610788	Jingyao_Zhang,Srikrishna_Iyer,Patrick_Schaumont,Yaling_Yang	2011	SUNSHINE extension: a hardware-software emulator for flexible sensor nodes in wireless networks.	db/conf/sensys/sensys2011.html#ZhangISY11
2610803	Steven_Mudda,Alessandro_Puiatti,Silvia_Giordano	2010	DisCord: discovering and coordinating data exchange protocol in opportunistic wireless sensor networks.	db/conf/sensys/sensys2010.html#MuddaPG10
2610817	Jiangwei_Zhou,Yu_Chen,Ben_Leong,Pratibha_Sundar_Sundaramoorthy	2010	Practical 3D geographic routing for wireless sensor networks.	db/conf/sensys/sensys2010.html#ZhouCLS10
2610819	Timothy_W._Hnat,Erin_Griffiths,Raymond_Dawson,Kamin_Whitehouse	2012	Doorjamb: unobtrusive room-level tracking of people in homes using doorway sensors.	db/conf/sensys/sensys2012.html#HnatGDW12
2610822	David_E._Irwin,Sean_Kenneth_Barker,Aditya_Kumar_Mishra,Prashant_J._Shenoy,Anthony_Wu,Jeannie_R._Albrecht	2011	Exploiting home automation protocols for load monitoring in smart buildings.	db/conf/sensys/buildsys2011.html#IrwinBMSWA11
2610824	Junyan_Ma,mer	2010	Balancing visibility and resource consumption for long-term monitoring of sensornets.	db/conf/sensys/sensys2010.html#MaR10
2610828	Thomas_Schmid,Zainul_Charbiwala,Zafeiria_Anagnostopoulou,Mani_B._Srivastava,Prabal_Dutta	2010	A case against routing-integrated time synchronization.	db/conf/sensys/sensys2010.html#SchmidCASD10
2610834	nen,Jani_Ylioja,rhi,ty,Timo_Ojala,Jukka_Riekki	2012	Holistic energy consumption monitoring in buildings with IP-based wireless sensor networks.	db/conf/sensys/buildsys2012.html#LeppanenYNROR12
2610836	David_Chu,Nicholas_D._Lane,Ted_Tsung-Te_Lai,Cong_Pang,Xiangying_Meng,Qing_Guo,Fan_Li,Feng_Zhao	2011	Balancing energy, latency and accuracy for mobile sensor data classification.	db/conf/sensys/sensys2011.html#ChuLLPMGLZ11
2610839	Andrew_C._Rice,Simon_Hay,Dan_Ryder-Cook	2010	A limited-data model of building energy consumption.	db/conf/sensys/buildsys2010.html#RiceHR10
2610843	Yongtae_Park,Hyogon_Kim	2012	Tagging cities?: reading RFID tags from inside brick and mortar.	db/conf/sensys/sensys2012.html#ParkK12
2610853	Tomas_Gerlich,James_Biagioni,Timothy_Merrifield,Jakob_Eriksson	2011	Tracking transit with EasyTracker.	db/conf/sensys/sensys2011.html#GerlichBME11
2610864	Roman_Lim,Christoph_Walser,Federico_Ferrari,Marco_Zimmerling,Jan_Beutel	2012	Distributed and synchronized measurements with FlockLab.	db/conf/sensys/sensys2012.html#LimWFZB12
2610870	Paul_D._Martin_0001,Zainul_Charbiwala,Mani_B._Srivastava	2012	DoubleDip: leveraging thermoelectric harvesting for low power monitoring of sporadic water use.	db/conf/sensys/sensys2012.html#MartinCS12
2610872	Wael_El-Essawy,Malcolm_S._Ware,Alexandre_Ferreira,Karthick_Rajamani,Juan_Rubio,Michael_A._Schappert,Tom_W._Keller,Hendrik_F._Hamann	2011	Smarter data center power monitoring and management.	db/conf/sensys/sensys2011.html#El-EssawyWFRRSKH11
2610875	Bin_Liu_0004,Yurong_Jiang,Fei_Sha,Ramesh_Govindan	2012	Cloud-enabled privacy-preserving collaborative learning for mobile sensing.	db/conf/sensys/sensys2012.html#0004JSG12
2610894	Tobias_Flach,Nilesh_Mishra,Luis_Pedrosa,Christopher_Riesz,Ramesh_Govindan	2011	CarMA: towards personalized automotive tuning.	db/conf/sensys/sensys2011.html#FlachMPRG11
2610898	Girts_Strazdins,Atis_Elsts,Leo_Selavo	2010	MansOS: easy to use, portable and resource efficient operating system for networked embedded devices.	db/conf/sensys/sensys2010.html#StrazdinsES10
2610911	Jedidiah_McClurg,Goce_Trajcevski,Jesse_Yanutola	2012	Collaborative reactive behavior in heterogeneous wireless sensor networks.	db/conf/sensys/sensys2012.html#McClurgTY12
2610914	Siddharth_Zaveri,Shane_Ross,Varick_L._Erickson,Ankur_Kamthe,Tao_Liu,Alberto_Cerpa	2011	Building energy management systems actuated using wireless camera sensor networks.	db/conf/sensys/buildsys2011.html#ZaveriREKLC11
2610918	Po-Yu_Chen,Hsi-Min_Lin,Wen-Tsuen_Chen,Yu-Chee_Tseng	2010	A multi-view visual surveillance system based on angle coverage.	db/conf/sensys/sensys2010.html#ChenLCT10
2610919	Tao_Liu,Alberto_Cerpa	2012	TALENT: temporal adaptive link estimator with no training.	db/conf/sensys/sensys2012.html#LiuC12
2610922	Tianji_Wu,Mani_B._Srivastava	2012	Low-cost appliance state sensing for energy disaggregation.	db/conf/sensys/buildsys2012.html#WuS12
2610923	Jorge_Ortiz,Yongwoo_Noh,Gavin_Saldanha,David_Su,David_E._Culler	2012	Towards real-time, fine-grained energy analytics in buildings through mobile phones.	db/conf/sensys/buildsys2012.html#OrtizNSSC12
2610924	Pandarasamy_Arjunan,Nipun_Batra_0001,Haksoo_Choi,Amarjeet_Singh,Pushpendra_Singh,Mani_B._Srivastava	2012	SensorAct: a privacy and security aware federated middleware for building management.	db/conf/sensys/buildsys2012.html#ArjunanBCSSS12
2610927	Chenren_Xu,Mingchen_Gao,Bernhard_Firner,Yanyong_Zhang,Richard_E._Howard,Jun_Li	2012	Towards robust device-free passive localization through automatic camera-assisted recalibration.	db/conf/sensys/sensys2012.html#XuGFZHL12
2610936	Matteo_Chini,Matteo_Ceriotti,Ramona_Marfievici,Amy_L._Murphy,Gian_Pietro_Picco	2011	TRIDENT, untethered observation of physical communication made to share.	db/conf/sensys/sensys2011.html#ChiniCMMP11
2610938	Chenren_Xu,Bernhard_Firner,Yanyong_Zhang,Richard_E._Howard,Jun_Li	2011	Statistical learning strategies for RF-based indoor device-free passive localization.	db/conf/sensys/sensys2011.html#XuFZHL11
2610943	Adrian_Albert,Ram_Rajagopal,Raffi_Sevlian	2011	Segmenting consumers using smart meter data.	db/conf/sensys/buildsys2011.html#AlbertRS11
2610945	Oliver_Lauer,Patrick_Leidenberger,ri,Marco_Zahner,hlich	2011	A novel measurement system for environmental exposure monitoring.	db/conf/sensys/sensys2011.html#LauerLMZF11
2610947	David_Sturzenegger,Dimitrios_Gyalistras,Manfred_Morari,Roy_S._Smith	2012	Semi-automated modular modeling of buildings for model predictive control.	db/conf/sensys/buildsys2012.html#SturzeneggerGMS12
2610949	Alvin_Cheung,Arvind_Thiagarajan,Samuel_Madden	2011	Automatically generating interesting events with LifeJoin.	db/conf/sensys/sensys2011.html#CheungTM11
2610950	Jiao_Wang,Fang_Cheng,Jiangshan_Wang,Guobin_Shen,Xiaofan_Jiang	2012	Genius-on-the-go: FM radio based proximity sensing and audio information sharing.	db/conf/sensys/sensys2012.html#WangCWSJ12
2610951	Hahn_Pereira,Cintia_B._Margi	2012	Energy management for wireless sensor networks.	db/conf/sensys/sensys2012.html#PereiraM12
2610954	Willy_Bernal,Madhur_Behl,Truong_X._Nghiem,Rahul_Mangharam	2012	MLE+: a tool for integrated design and deployment of energy efficient building controls.	db/conf/sensys/buildsys2012.html#BernalBNM12
2610956	Arvind_Thiagarajan,James_Biagioni,Tomas_Gerlich,Jakob_Eriksson	2010	Cooperative transit tracking using smart-phones.	db/conf/sensys/sensys2010.html#ThiagarajanBGE10
2610957	S._M._Shahriar_Nirjon,Robert_F._Dickerson,Qiang_Li,Philip_Asare,John_A._Stankovic,Dezhi_Hong,Ben_Zhang,Xiaofan_Jiang,Guobin_Shen,Feng_Zhao	2012	MusicalHeart: a	db/conf/sensys/sensys2012.html#NirjonDLASHZJSZ12
2610959	Chen_Liu,Baoguo_Li,Dingyi_Fang,Songtao_Guo,Xiaojiang_Chen,Tianzhang_Xing	2011	Rhinopithecus roxellana monitoring and identification using wireless sensor networks.	db/conf/sensys/sensys2011.html#LiuLFGCX11
2610961	Mario_Berges,Anthony_Rowe	2011	Appliance classification and energy management using multi-modal sensing.	db/conf/sensys/buildsys2011.html#BergesR11
2610965	Andrew_Krioukov,Gabe_Fierro,Nikita_Kitaev,David_E._Culler	2012	Building application stack (BAS).	db/conf/sensys/buildsys2012.html#KrioukovFKC12
2610968	Daito_Akimura,Yoshihiro_Kawahara,Tohru_Asami	2011	Reducing power consumption of human activity sensing using compressed sensing.	db/conf/sensys/sensys2011.html#AkimuraKA11
2610971	Santanu_Guha,Kurt_Plarre,Daniel_Lissner,Somnath_Mitra,Bhagavathy_Krishna,Prabal_Dutta,Santosh_Kumar	2010	AutoWitness: locating and tracking stolen property while tolerating GPS and radio outages.	db/conf/sensys/sensys2010.html#GuhaPLMKDK10
2610982	Jae_Yoon_Chong,Jinwook_Baek,Sukun_Kim	2011	INPRESS: indoor climate prediction and evaluation system for energy efficiency using sensor networks.	db/conf/sensys/sensys2011.html#ChongBK11
2610984	Anthony_Schoofs,Alex_Sintoni,Antonio_G._Ruzzelli,Gregory_M._P._O'Hare	2010	NetBem: business equipment energy monitoring through network auditing.	db/conf/sensys/buildsys2010.html#SchoofsSRO10
2610986	Matthias_Keller,Jan_Beutel,Lothar_Thiele	2012	How was your journey?: uncovering routing dynamics in deployed sensor networks with multi-hop network tomography.	db/conf/sensys/sensys2012.html#KellerBT12
2610992	Joachim_Wilke,Christian_Haas_0002	2011	Energy-efficiency of WSN concast communication: a reality-check.	db/conf/sensys/sensys2011.html#WilkeH11
2611004	Farrokh_Jazizadeh,Burcin_Becerik-Gerber	2012	Toward adaptive comfort management in office buildings using participatory sensing for end user driven control.	db/conf/sensys/buildsys2012.html#JazizadehB12
2611007	Karlis_Prieditis,Ivars_Drikis,Leo_Selavo	2010	SAntArray: passive element array antenna for wireless sensor networks.	db/conf/sensys/sensys2010.html#PrieditisDS10
2611008	Lohit_Yerva,Apoorva_Bansal,Bradford_Campbell,Prabal_Dutta,Thomas_Schmid	2011	An IEEE 802.15.4-compatible, battery-free, energy-harvesting sensor node.	db/conf/sensys/sensys2011.html#YervaBCDS11
2611017	David_Lachut,Simon_Piel,Lazeeb_Choudhury,Yucheng_Xiong,Sami_Rollins,Kevin_Moran,Nilanjan_Banerjee	2012	Minimizing intrusiveness in home energy measurement.	db/conf/sensys/buildsys2012.html#LachutPCXRMB12
2611022	Wei_Xi,Yuan_He_0004,Yunhao_Liu,Jizhong_Zhao,Lufeng_Mo,Zheng_Yang,Jiliang_Wang,Xiang-Yang_Li	2010	Locating sensors in the wild: pursuit of ranging quality.	db/conf/sensys/sensys2010.html#XiHLZMYWL10
2611024	Stephen_Dawson-Haggerty,Xiaofan_Jiang,Gilman_Tolle,Jorge_Ortiz,David_E._Culler	2010	sMAP: a simple measurement and actuation profile for physical information.	db/conf/sensys/sensys2010.html#Dawson-HaggertyJTOC10
2611026	Jaechul_Kim,Sik_Yu,Youngjoon_Kim,Sukun_Kim,Jeonghoon_Kang,Hojung_Lim,Hyungseok_Kim	2010	Open sensor network interface for U-City service platform.	db/conf/sensys/sensys2010.html#KimYKKKLK10
2611029	Matthias_Keller,Guido_Hungerbuehler,Oliver_Knecht,Suhel_Sheikh,Jan_Beutel,Stefanie_Gubler,Joel_Fiddes,Stephan_Gruber	2010	None	db/conf/sensys/sensys2010.html#KellerHKSBGFG10
2611039	Matteo_Ceriotti,Amy_L._Murphy	2010	A MAC contest between LPL (the champion) and Reins-MAC (the challenger, an anarchic TDMA scheduler providing QoS).	db/conf/sensys/sensys2010.html#CeriottiM10
2611041	Jeonghoon_Kang,Jaechul_Kim,Du-Hwan_Yeo,Jongmin_Hyun,Kooklae_Jo,Taejoon_Choi,Pil-Mhan_Jung,Hangyeol_Kim,Su_Chang_Lee,Sukun_Kim	2012	Modular approach in sensor board design.	db/conf/sensys/sensys2012.html#KangKYHJCJKLK12
2611048	James_Scott,A._J._Bernheim_Brush,Ratul_Mahajan	2012	Augmenting homes with custom devices using .NET Gadgeteer and HomeOS.	db/conf/sensys/buildsys2012.html#ScottBM12
2611051	Avraham_Klausner,Ari_Trachtenberg,David_Starobinski	2011	Phones and robots: brains and brawn.	db/conf/sensys/sensys2011.html#KlausnerTS11
2611052	Yiran_Shen,Wen_Hu,Junbin_Liu,Mingrui_Yang,Bo_Wei,Chun_Tung_Chou	2012	Efficient background subtraction for real-time tracking in embedded camera networks.	db/conf/sensys/sensys2012.html#ShenHLYWC12
2611053	Lin_Zhang_0001,Wenzhu_Zhang,Xinyu_Mao,Jiantao_Jiao,Shijie_Zheng,Linglong_Li,Yujie_Liu,Teng_Wang,Ming_Gu	2010	NOMAD: networked-observation and mobile-agent-based scene abstraction and determination.	db/conf/sensys/sensys2010.html#ZhangZMJZLLWG10
2611058	Rui_Liao,Geng_Li,Shun_Miao,Yan_Lu,Jianmin_Zhu,Ling_Shen	2012	Weather-clustering based strategy design for dynamic demand response building HVAC control.	db/conf/sensys/buildsys2012.html#LiaoLMLZS12
2611059	Xi_Chen,Lei_Xie,Xiaofan_Jiang,Sanglu_Lu,Daoxu_Chen	2012	iBookshelf: accurately search and locate books with an adaptive and intelligent bookshelf.	db/conf/sensys/sensys2012.html#ChenXJLC12
2611062	Desheng_Zhang,Tian_He,Yunhuai_Liu,Yu_Gu_0001,Fan_Ye,Raghu_K._Ganti,Hui_Lei	2012	None	db/conf/sensys/sensys2012.html#ZhangHL0YGL12
2972022	Ruma_R._Paul,Victor_C._Valgenti,Min_Sik_Kim	2011	Real-time Netshuffle: Graph distortion for on-line anonymization.	db/conf/icnp/icnp2011.html#PaulVK11
2972027	Namusale_Chama,Rute_C._Sofia,Susana_Sargento	2011	Impact of mobility on user-centric routing.	db/conf/icnp/icnp2011.html#ChamaSS11
2972037	Wei_Wang_0102,Ben_Leong,Wei_Tsang_Ooi	2011	Understanding and mitigating TCP starvation in 802.11 wireless mesh networks.	db/conf/icnp/icnp2011.html#WangLO11
2972042	Md._Yusuf_Sarwar_Uddin,Brighten_Godfrey,Tarek_F._Abdelzaher	2010	RELICS: In-network realization of incentives to combat selfishness in DTNs.	db/conf/icnp/icnp2010.html#UddinGA10
2972044	Soroush_Haeri,Dario_Kresic,Ljiljana_Trajkovic	2011	Probabilistic verification of BGP convergence.	db/conf/icnp/icnp2011.html#HaeriKT11
2972045	Ruidong_Li,Ved_P._Kafle,Hiroaki_Harai	2012	A proactive scheme for securing ID/locator split architecture.	db/conf/icnp/icnp2012.html#LiKH12
2972052	Ze_Li,Haiying_Shen	2012	Social-P2P: Social network-based P2P file sharing system.	db/conf/icnp/icnp2012.html#LiS12
2972055	Yating_Hsu,David_Lee	2011	Machine learning for implanted malicious code detection with incompletely specified system implementations.	db/conf/icnp/icnp2011.html#HsuL11
2972058	Hrishikesh_B._Acharya,Aditya_Joshi,Mohamed_G._Gouda	2010	Firewall modules and modular firewalls.	db/conf/icnp/icnp2010.html#AcharyaJG10
2972059	Marios_Kokkodis,tsos,Athina_Markopoulou	2011	Network-level characteristics of spamming: An empirical analysis.	db/conf/icnp/icnp2011.html#KokkodisFM11
2972066	Sarah_Edenhofer,fner	2012	Towards a rigorous analysis of AODVv2 (DYMO).	db/conf/icnp/icnp2012.html#EdenhoferH12
2972081	Qian_Wang,Kui_Ren,Peng_Ning	2011	Anti-jamming communication in cognitive radio networks with unknown channel statistics.	db/conf/icnp/icnp2011.html#WangRN11
2972085	Shaxun_Chen,Kai_Zeng,Prasant_Mohapatra	2011	Efficient data capturing for network forensics in cognitive radio networks.	db/conf/icnp/icnp2011.html#ChenZM11
2972099	Xuejun_Zhuo,Wei_Gao,Guohong_Cao,Yiqi_Dai	2011	Win-Coupon: An incentive framework for 3G traffic offloading.	db/conf/icnp/icnp2011.html#ZhuoGCD11
2972115	Shaoquan_Zhang,Ziyu_Shao,Minghua_Chen	2010	Optimal distributed P2P streaming under node degree bounds.	db/conf/icnp/icnp2010.html#ZhangSC10
2972130	Kebin_Liu,Mo_Li,Yunhao_Liu,Xiang-Yang_Li,Minglu_Li,Huadong_Ma	2010	Exploring the hidden connectivity in urban vehicular networks.	db/conf/icnp/icnp2010.html#LiuLLLLM10
2972134	Fei_Chen,Bezawada_Bruhadeshwar,Alex_X._Liu	2011	Privacy-preserving cross-domain network reachability quantification.	db/conf/icnp/icnp2011.html#ChenBL11
2972135	Xiaojun_Feng,Jin_Zhang,Qian_Zhang,Bo_Li_0001	2011	REPICK: Random access MAC with reversed contention and Piggy-backed ACK.	db/conf/icnp/icnp2011.html#FengZZL11
2972166	Yu_Cao,Mingwei_Xu,Xiaoming_Fu_0001	2012	Delay-based congestion control for multipath TCP.	db/conf/icnp/icnp2012.html#CaoXF12
2972167	Hanhua_Chen,Hai_Jin,Ning_Jin,Tao_Gu	2012	Minimizing inter-server communications by exploiting self-similarity in online social networks.	db/conf/icnp/icnp2012.html#ChenJJG12
2972175	Fahad_A._Arshad,Gaspar_Modelo-Howard,Saurabh_Bagchi	2012	To cloud or not to cloud: A study of trade-offs between in-house and outsourced virtual private network.	db/conf/icnp/icnp2012.html#ArshadMB12
2972178	Yangyang_Wang,Jun_Bi,Jianping_Wu	2011	AIDR: Aggregation of BGP routing table with AS path stretch.	db/conf/icnp/icnp2011.html#WangBW11
2972183	Xiaoke_Jiang,Jun_Bi,Yangyang_Wang,Zhijie_He,Wei_Zhang_0040,Hongcheng_Tian	2011	IPv6 evolution, stability and deployment.	db/conf/icnp/icnp2011.html#JiangBWHZT11
2972191	Shucheng_Liu,Guoliang_Xing,Hongwei_Zhang,Jianping_Wang,Jun_Huang,Mo_Sha,Liusheng_Huang	2010	Passive interference measurement in Wireless Sensor Networks.	db/conf/icnp/icnp2010.html#LiuXZWHSH10
2972198	Antonio_Junior,Rute_C._Sofia,nio_Costa	2011	Energy-efficient routing.	db/conf/icnp/icnp2011.html#JuniorSC11
2972203	Dan_Li,Mingwei_Xu,Hongze_Zhao,Xiaoming_Fu_0001	2011	Building mega data center from heterogeneous containers.	db/conf/icnp/icnp2011.html#LiXZF11
2972207	Peilong_Li,Honghai_Zhang,Baohua_Zhao,Sampath_Rangarajan	2010	Scalable video multicast with joint layer resource allocation in broadband wireless networks.	db/conf/icnp/icnp2010.html#LiZZR10
2972215	Sohraab_Soltani,Hassan_Aqeel_Khan,Hayder_Radha	2012	FAST: A channel access protocol for wireless video (and non-video) traffic.	db/conf/icnp/icnp2012.html#SoltaniKR12
2972217	Xinwen_Zhang,Katharine_Chang,Huijun_Xiong,Yonggang_Wen,Guangyu_Shi,Guoqiang_Wang	2011	Towards name-based trust and security for content-centric network.	db/conf/icnp/icnp2011.html#ZhangCXWSW11
2972222	Pingping_Lin,Jun_Bi,Hongyu_Hu	2012	VCP: A virtualization cloud platform for SDN intra-domain production network.	db/conf/icnp/icnp2012.html#LinBH12
2972224	Ning_Jin,Kaiji_Chen,Tao_Gu	2012	Energy balanced data collection in Wireless Sensor Networks.	db/conf/icnp/icnp2012.html#JinCG12
2972229	Florin_Dinu,T._S._Eugene_Ng	2011	Inferring a network congestion map with zero traffic overhead.	db/conf/icnp/icnp2011.html#DinuN11
2972246	Baobao_Zhang,Jun_Bi,Jianping_Wu	2012	AFEC: A method of aggregating forwarding equivalence classes based on overlapped paths.	db/conf/icnp/icnp2012.html#ZhangBW12
2972261	Shuyuan_Zhang,Abdulrahman_Mahmoud,Sharad_Malik,Sanjai_Narain	2012	Verification and synthesis of firewalls using SAT and QBF.	db/conf/icnp/icnp2012.html#ZhangMMN12
2972263	Fernando_A._Kuipers,Anteneh_Beshir,Ariel_Orda,Piet_Van_Mieghem	2010	Impairment-aware path selection and regenerator placement in translucent optical networks.	db/conf/icnp/icnp2010.html#KuipersBOM10
2972283	Jun_Li_0001,Toby_Ehrenkranz,Paul_Elliott	2012	Buddyguard: A buddy system for fast and reliable detection of IP prefix anomalies.	db/conf/icnp/icnp2012.html#0001EE12
2972287	Debbie_Perouli,Timothy_G._Griffin,Olaf_Maennel,Sonia_Fahmy,Iain_Phillips,Cristel_Pelsser	2012	Detecting the unintended in BGP policies.	db/conf/icnp/icnp2012.html#PerouliGMFPP12
2972289	Erik_Kline,Alexander_Afanasyev,Peter_L._Reiher	2011	Shield: DoS filtering using traffic deflecting.	db/conf/icnp/icnp2011.html#KlineAR11
2972295	Julien_Herzen,dric_Westphal,Patrick_Thiran	2011	Scalable routing easy as PIE: A practical isometric embedding protocol.	db/conf/icnp/icnp2011.html#HerzenWT11
2972296	Shaojie_Tang,Jie_Wu_0001,Guihai_Chen,Cheng_Wang,Xuefeng_Liu,Tao_Li,Xiang-Yang_Li	2012	On minimum delay duty-cycling protocol in sustainable sensor network.	db/conf/icnp/icnp2012.html#TangWCWLLL12
2972299	Kevin_Weekly,Kristofer_S._J._Pister	2012	Evaluating sinkhole defense techniques in RPL networks.	db/conf/icnp/icnp2012.html#WeeklyP12
2972307	Yong_Li_0008,Li_Su,Depeng_Jin,Lieguang_Zeng	2011	TUNIE: A virtualized platform for network experiment on programmable infrastructure.	db/conf/icnp/icnp2011.html#LiSJZ11
2972317	Wei_Dong,Yunhao_Liu,Chao_Wang,Xue_Liu,Chun_Chen,Jiajun_Bu	2011	Link quality aware code dissemination in wireless sensor networks.	db/conf/icnp/icnp2011.html#DongLWLCB11
2972323	George_Papageorgiou,Shailendra_Singh,Srikanth_V._Krishnamurthy,Ramesh_Govindan,Tom_La_Porta	2012	Distortion-Resilient Routing for Video Flows in Wireless Multi-hop Networks.	db/conf/icnp/icnp2012.html#PapageorgiouSKGP12
2972327	Xinyu_Zhang,Kang_G._Shin	2011	Adaptive Subcarrier Nulling: Enabling partial spectrum sharing in wireless LANs.	db/conf/icnp/icnp2011.html#ZhangS11
2972328	Xuejun_Zhuo,Qinghua_Li,Wei_Gao,Guohong_Cao,Yiqi_Dai	2011	Contact duration aware data replication in Delay Tolerant Networks.	db/conf/icnp/icnp2011.html#ZhuoLGCD11
2972329	Le_Chang,Jianping_Pan	2012	Towards the optimal caching strategies of peer-assisted VoD systems with HD channels.	db/conf/icnp/icnp2012.html#ChangP12
2972349	Yuan_Feng,Baochun_Li,Bo_Li_0001	2012	Airlift: Video conferencing as a cloud service using inter-datacenter networks.	db/conf/icnp/icnp2012.html#FengLL12
2972352	Lei_Yu_0002,Karan_Sapra,Haiying_Shen,Lin_Ye	2012	Cooperative end-to-end traffic redundancy elimination for reducing cloud bandwidth cost.	db/conf/icnp/icnp2012.html#YuSSY12
2972360	Mohammad_Ehdaie,Nikolaos_Alexiou,Mahmoud_Ahmadian-Attari,Mohammad_Reza_Aref,Panos_Papadimitratos	2012	Key splitting for random key distribution schemes.	db/conf/icnp/icnp2012.html#EhdaieAAAP12
2972377	Dejun_Yang,Guoliang_Xue,Xi_Fang,Satyajayant_Misra,Jin_Zhang	2010	Routing in max-min fair networks: A game theoretic approach.	db/conf/icnp/icnp2010.html#YangXFMZ10
2972383	Chuan_Han,Yaling_Yang,Yongxiang_Peng	2010	Optimal cache-based route repair for real-time traffic.	db/conf/icnp/icnp2010.html#HanYP10
2972385	Yin_Xu,Wai_Kay_Leong,Ben_Leong,Ali_Razeen	2012	Dynamic regulation of mobile 3G/HSPA uplink buffer with Receiver-side Flow Control.	db/conf/icnp/icnp2012.html#XuLLR12
2972387	Zi_Li,Yang_Peng,Wensheng_Zhang_0001,Daji_Qiao	2011	J-RoC: A Joint Routing and Charging scheme to prolong sensor network lifetime.	db/conf/icnp/icnp2011.html#LiPZQ11
2972388	Dan_Li,Henggang_Cui,Yan_Hu,Yong_Xia,Xin_Wang_0001	2011	Scalable data center multicast using multi-class Bloom Filter.	db/conf/icnp/icnp2011.html#LiCHXW11
2972392	Ying_Zhang,Mallik_Tatipamula	2011	Characterization and design of effective BGP AS-path prepending.	db/conf/icnp/icnp2011.html#ZhangT11
2972406	Takeshi_Kubo,Atsushi_Tagami,Teruyuki_Hasegawa,Toru_Hasegawa,Jean_C._Walrand	2012	Range-free localization using grid graph extraction.	db/conf/icnp/icnp2012.html#KuboTHHW12
2972410	Jianxia_Ning,Shailendra_Singh,Konstantinos_Pelechrinis,Bin_Liu_0004,Srikanth_V._Krishnamurthy,Ramesh_Govindan	2012	Forensic analysis of packet losses in wireless networks.	db/conf/icnp/icnp2012.html#NingSP0KG12
2972420	Somaya_Arianfar,Pasi_Sarolahti,rg_Ott	2012	Marooned magic numbers - An adaptive congestion control architecture.	db/conf/icnp/icnp2012.html#ArianfarSO12
2972429	Lei_Jiao,Jun_Li,Tianyin_Xu,Xiaoming_Fu_0001	2012	Cost optimization for Online Social Networks on geo-distributed clouds.	db/conf/icnp/icnp2012.html#JiaoLXF12
2972436	Wei_Gao,Guohong_Cao	2010	On exploiting transient contact patterns for data forwarding in Delay Tolerant Networks.	db/conf/icnp/icnp2010.html#GaoC10
2972441	Rajesh_Krishna_Panta,Robert_J._Hall,Josh_Auzins,Maria_Fernandez	2011	Geocast for wireless sensor networks.	db/conf/icnp/icnp2011.html#PantaHAF11
2972445	Raju_Kumar,Srikar_Tati,Felipe_de_Mello,Srikanth_V._Krishnamurthy,Thomas_F._La_Porta	2010	Network Coding aware Rate Selection in multi-rate IEEE 802.11.	db/conf/icnp/icnp2010.html#KumarTMKP10
2972447	Kang_Chen,Haiying_Shen	2012	SMART: Lightweight distributed Social Map based Routing in Delay Tolerant Networks.	db/conf/icnp/icnp2012.html#ChenS12
2972448	Eugene_Chai,Kang_G._Shin	2011	Sidekick: AP aggregation over partially overlapping channels.	db/conf/icnp/icnp2011.html#ChaiS11
2972470	Seungwon_Shin,Guofei_Gu	2012	CloudWatcher: Network security monitoring using OpenFlow in dynamic cloud networks (or: How to provide security monitoring as a service in clouds?).	db/conf/icnp/icnp2012.html#ShinG12
2972473	Chen_Chen_0019,Limin_Jia,Boon_Thau_Loo,Wenchao_Zhou	2012	Reduction-based security analysis of Internet routing protocols.	db/conf/icnp/icnp2012.html#ChenJLZ12
2972499	Kang_Chen,Haiying_Shen	2011	Global optimization of file availability through replication for efficient file sharing in MANETs.	db/conf/icnp/icnp2011.html#ChenS11
2972502	Shaojie_Tang,XuFei_Mao,Xiang-Yang_Li	2011	Efficient and fast distributed top-k query protocol in wireless sensor networks.	db/conf/icnp/icnp2011.html#TangML11
2972504	Matthew_J._Probst,Jun_Cheol_Park,Ravin_Abraham,Sneha_Kumar_Kasera	2010	SocialSwarm: Exploiting distance in social networks for collaborative flash file distribution.	db/conf/icnp/icnp2010.html#ProbstPAK10
2972506	Lei_Yang,Jinsong_Han,Yong_Qi,Yunhao_Liu	2010	Identification-free batch authentication for RFID tags.	db/conf/icnp/icnp2010.html#YangHQL10
2972511	Sofiane_Hassayoun,Janardhan_R._Iyengar,David_Ros	2011	Dynamic Window Coupling for multipath congestion control.	db/conf/icnp/icnp2011.html#HassayounIR11
2972512	Vincent_Rahli,Nicolas_Schiper,Robbert_van_Renesse,Mark_Bickford,Robert_L._Constable	2012	A diversified and correct-by-construction broadcast service.	db/conf/icnp/icnp2012.html#RahliSRBC12
2972517	Debbie_Perouli,Stefano_Vissicchio,Alexander_J._T._Gurney,Olaf_Maennel,Timothy_G._Griffin,Iain_Phillips,Sonia_Fahmy,Cristel_Pelsser	2012	Reducing the complexity of BGP stability analysis with hybrid combinatorial-algebraic models.	db/conf/icnp/icnp2012.html#PerouliVGMGPFP12
2972522	Luca_Cittadini,Giuseppe_Di_Battista,Thomas_Erlebach,Maurizio_Patrignani,Massimo_Rimondini	2010	Assigning AS relationships to satisfy the Gao-Rexford conditions.	db/conf/icnp/icnp2010.html#CittadiniBEPR10
2972525	Guang_Yao,Jun_Bi,Peiyao_Xiao	2011	Source address validation solution with OpenFlow/NOX architecture.	db/conf/icnp/icnp2011.html#YaoBX11
2972540	Nan_Jiang,Jin_Cao,Yu_Jin_0001,Erran_L._Li,Zhi-Li_Zhang	2010	Identifying suspicious activities through DNS failure graph analysis.	db/conf/icnp/icnp2010.html#JiangCJLZ10
2972552	Xiaoxiao_Hou,Pralhad_Deshpande,Samir_R._Das	2011	Moving bits from 3G to metro-scale WiFi for vehicular network access: An integrated transport layer solution.	db/conf/icnp/icnp2011.html#HouDD11
2972553	Yipeng_Wang,Xiao-chun_Yun,Muhammad_Zubair_Shafiq,Liyan_Wang,Alex_X._Liu,Zhibin_Zhang,Danfeng_Yao,Yongzheng_Zhang_0002,Li_Guo_0001	2012	A semantics aware approach to automated reverse engineering unknown protocols.	db/conf/icnp/icnp2012.html#WangYSWLZY0G12
2972556	Matvey_Arye,m,Robert_Kiefer,Jennifer_Rexford,Michael_J._Freedman	2012	A formally-verified migration protocol for mobile, multi-homed hosts.	db/conf/icnp/icnp2012.html#AryeNKRF12
2972560	Onur_Ascigil	2011	PhD Forum: On the scalability of source routing architectures.	db/conf/icnp/icnp2011.html#Ascigil11
2972562	Duy_Nguyen,J._J._Garcia-Luna-Aceves	2011	A practical approach to rate adaptation for multi-antenna systems.	db/conf/icnp/icnp2011.html#NguyenG11
2972571	Xiaoke_Jiang,Jun_Bi,You_Wang,Pingping_Lin,Zhaogeng_Li	2012	A content provider mobility solution of named data networking.	db/conf/icnp/icnp2012.html#JiangBWLL12
2972579	Tongqing_Qiu,Lusheng_Ji,Dan_Pei,Jia_Wang,Jun_(Jim)_Xu	2010	TowerDefense: Deployment strategies for battling against IP prefix hijacking.	db/conf/icnp/icnp2010.html#QiuJPWX10
2972603	Chun-Yun_Chang,Cheng-Fu_Chou,Ming-Hung_Chen	2011	Striking the balance between content diversity and content importance in swarm-based P2P streaming.	db/conf/icnp/icnp2011.html#ChangCC11
2972612	Yiyang_Li,Jianxia_Ning,Zhengyuan_Xu,Srikanth_V._Krishnamurthy,Gang_Chen_0007	2010	UVOC-MAC: A MAC protocol for outdoor ultraviolet networks.	db/conf/icnp/icnp2010.html#LiNXKC10
2972630	Mohammad_Zubair_Ahmad,Ratan_Guha	2011	Internet exchange points and Internet routing.	db/conf/icnp/icnp2011.html#AhmadG11
2972645	Hongcheng_Tian,Jun_Bi,Wei_Zhang_0040,Xiaoke_Jiang	2011	EasyTrace: An easily-deployable light-weight IP traceback on an AS-level overlay network.	db/conf/icnp/icnp2011.html#TianBZJ11
2972648	Jing_Zhu,Dan_Li,Jianping_Wu,Hongnan_Liu,Ying_Zhang,Jingcheng_Zhang	2012	Towards bandwidth guarantee in multi-tenancy cloud computing networks.	db/conf/icnp/icnp2012.html#ZhuLWLZZ12
2972651	Sufian_Hameed,Xiaoming_Fu_0001,Pan_Hui,Nishanth_R._Sastry	2011	LENS: Leveraging social networking and trust to prevent spam transmission.	db/conf/icnp/icnp2011.html#HameedFHS11
2972694	Yong_Fu,Mo_Sha,Gregory_Hackmann,Chenyang_Lu	2012	Practical control of transmission power for Wireless Sensor Networks.	db/conf/icnp/icnp2012.html#FuSHL12
2972697	Gowtham_Boddapati,John_Day,Ibrahim_Matta,Lubomir_T._Chitkushev	2012	Assessing the security of a clean-slate Internet architecture.	db/conf/icnp/icnp2012.html#BoddapatiDMC12
2972706	Suchul_Lee,Chong-kwon_Kim	2012	D-Fi: A diversity-aware Wi-Fi using an OFDM-based Bloom filter.	db/conf/icnp/icnp2012.html#LeeK12
2972710	Michael_Schier,Michael_Welzl	2012	Using DCCP: Issues and improvements.	db/conf/icnp/icnp2012.html#SchierW12
2972711	Tao_Feng,Jun_Bi,Hongyu_Hu	2012	TUNOS: A novel SDN-oriented networking operating system.	db/conf/icnp/icnp2012.html#FengBH12
2972713	Jun_Huang,Guoliang_Xing,Gang_Zhou,Ruogu_Zhou	2010	Beyond co-existence: Exploiting WiFi white space for Zigbee performance assurance.	db/conf/icnp/icnp2010.html#HuangXZZ10
2972720	Claude_Castelluccia,Emiliano_De_Cristofaro,lien_Francillon,afar	2011	EphPub: Toward robust Ephemeral Publishing.	db/conf/icnp/icnp2011.html#CastellucciaCFK11
2972721	Hyojoon_Kim,Mike_Schlansker,Jose_Renato_Santos,Jean_Tourrilhes,Yoshio_Turner,Nick_Feamster	2012	CORONET: Fault tolerance for Software Defined Networks.	db/conf/icnp/icnp2012.html#KimSSTTF12
2972735	Mingui_Zhang,Cheng_Yi,Bin_Liu_0001,Beichuan_Zhang	2010	GreenTE: Power-aware traffic engineering.	db/conf/icnp/icnp2010.html#ZhangYLZ10
2972741	Zhenyu_Yang,Ming_Li_0003,Wenjing_Lou	2010	CodePlay: Live multimedia streaming in VANETs using symbol-level network coding.	db/conf/icnp/icnp2010.html#YangLL10
2972747	Behnaz_Arzani,rin,Alejandro_Ribeiro	2012	A distributed routing protocol for predictable rates in wireless mesh networksy.	db/conf/icnp/icnp2012.html#ArzaniGR12
2972760	Zhuo_Huang,David_Lin,Jih-Kwon_Peir,Shigang_Chen,S._M._Iftekharul_Alam	2010	Fast routing table lookup based on deterministic multi-hashing.	db/conf/icnp/icnp2010.html#HuangLPCA10
2972767	Eric_Parsonage,Hung_X._Nguyen,Rhys_Alistair_Bowden,Simon_Knight,Nickolas_J._G._Falkner,Matthew_Roughan	2011	Generalized graph products for network design and analysis.	db/conf/icnp/icnp2011.html#ParsonageNBKFR11
2972771	Yuanqing_Zheng,Mo_Li	2011	Fast tag searching protocol for large-scale RFID systems.	db/conf/icnp/icnp2011.html#ZhengL11
2972772	Yang_Xiang,Zhiliang_Wang,Xia_Yin,Jianping_Wu	2011	Argus: An accurate and agile system to detecting IP prefix hijacking.	db/conf/icnp/icnp2011.html#XiangWYW11
2972778	Tong_Yang,Shenjiang_Zhang,Xianda_Sun,Huichen_Dai,Ruian_Duan,Jianyuan_Lu,Zhian_Mi,Bin_Liu_0001	2012	Virtual routing tables polymerization for lookup and update.	db/conf/icnp/icnp2012.html#YangZSDDLML12
2972802	Tong_Yang,Zhian_Mi,Ruian_Duan,Xiaoyu_Guo,Jianyuan_Lu,Shenjiang_Zhang,Xianda_Sun,Bin_Liu_0001	2012	An ultra-fast universal incremental update algorithm for trie-based routing lookup.	db/conf/icnp/icnp2012.html#YangMDGLZSL12
2972803	Alexander_J._T._Gurney,Timothy_G._Griffin	2010	Neighbor-specific BGP: An algebraic exploration.	db/conf/icnp/icnp2010.html#GurneyG10
2972818	Bo_Han,Aravind_Srinivasan	2012	eDiscovery: Energy efficient device discovery for mobile opportunistic communications.	db/conf/icnp/icnp2012.html#HanS12
2972830	Tao_Feng,Jun_Bi,Hongyu_Hu	2011	OpenRouter: OpenFlow extension and implementation based on a commercial router.	db/conf/icnp/icnp2011.html#FengBH11
2972849	Tao_Xiong,Jin_Zhang,Junmei_Yao,Wei_Lou	2012	Symbol-level detection: A new approach to silencing hidden terminals.	db/conf/icnp/icnp2012.html#XiongZYL12
2972852	Zied_Ben-Houidi,Mickael_Meulle	2010	A new VPN routing approach for large scale networks.	db/conf/icnp/icnp2010.html#Ben-HouidiM10
2972868	Xiaoping_Wang,Yunhao_Liu,Zheng_Yang,Junliang_Liu,Jun_Luo	2010	ETOC: Obtaining robustness in component-based localization.	db/conf/icnp/icnp2010.html#WangLYLL10
2972871	Sonia_Fahmy,Toru_Hasegawa	2010	Message from the technical program committee chairs.	db/conf/icnp/icnp2010.html#FahmyH10
2972874	Jiachen_Chen,Mayutan_Arumaithurai,Xiaoming_Fu_0001,K._K._Ramakrishnan	2011	Gaming over COPSS: A content centric communication infrastructure for gaming applications.	db/conf/icnp/icnp2011.html#ChenAFR11
2972878	Xin_Che,Xi_Ju,Hongwei_Zhang	2011	The case for addressing the limiting impact of interference on wireless scheduling.	db/conf/icnp/icnp2011.html#CheJZ11
2972879	Jung_Il_Choi,Mayank_Jain,Maria_A._Kazandjieva,Philip_Levis	2010	Granting silence to avoid wireless collisions.	db/conf/icnp/icnp2010.html#ChoiJKL10
2972889	Wenyu_Ren,Yong_Li_0008,Depeng_Jin,Li_Su,Lieguang_Zeng	2012	Optimal vehicles and coding decision for mobile data sharing in Vehicular Delay Tolerant Networks.	db/conf/icnp/icnp2012.html#RenLJSZ12
2972892	Chen_Qian,Simon_S._Lam	2012	ROME: Routing on metropolitan-scale Ethernet.	db/conf/icnp/icnp2012.html#QianL12
2972903	An_(Jack)_Chan,Henrik_Lundgren,Theodoros_Salonidis	2011	Video-Aware Rate Adaptation for MIMO WLANs.	db/conf/icnp/icnp2011.html#ChanLS11
2972913	Jaehyuk_Choi,Kang_G._Shin	2011	Out-of-band sensing with ZigBee for dynamic channel assignment in on-the-move hotspots.	db/conf/icnp/icnp2011.html#ChoiS11
2972924	Qinghua_Li,Guohong_Cao	2012	Efficient and privacy-preserving data aggregation in mobile sensing.	db/conf/icnp/icnp2012.html#LiC12
2972944	Jie_Li,Jun_Bi,Jianping_Wu	2012	Umbrella: A routing choice feedback based distributed inter-domain anti-spoofing solution.	db/conf/icnp/icnp2012.html#LiBW12
2972946	Shuo_Guo,Song_Min_Kim,Ting_Zhu,Yu_Gu_0001,Tian_He	2011	Correlated flooding in low-duty-cycle wireless sensor networks.	db/conf/icnp/icnp2011.html#GuoKZGH11
2972951	Teruo_Higashino,Kenji_Suzuki	2010	Message from the General Co-Chairs.	db/conf/icnp/icnp2010.html#HigashinoS10
2972955	Joon_Yoo,Brian_Sung_Chul_Choi,Mario_Gerla	2010	An opportunistic relay protocol for vehicular road-side access with fading channels.	db/conf/icnp/icnp2010.html#YooCG10
2972960	Yating_Hsu,David_Lee	2010	Authentication and authorization protocol security property analysis with trace inclusion transformation and online minimization.	db/conf/icnp/icnp2010.html#HsuL10
2972963	Laura_Marie_Feeney	2011	Self-organizing TDMA for multihop networks.	db/conf/icnp/icnp2011.html#Feeney11
2972973	Yuan_Feng,Baochun_Li,Bo_Li_0001	2010	Peer-assisted VoD prefetching in double auction markets.	db/conf/icnp/icnp2010.html#FengLL10
2972982	Feng_Qian,Zhaoguang_Wang,Alexandre_Gerber,Zhuoqing_Morley_Mao,Subhabrata_Sen,Oliver_Spatscheck	2010	TOP: Tail Optimization Protocol For Cellular Radio Resource Allocation.	db/conf/icnp/icnp2010.html#QianWGMSS10
2972995	You_Wang,Jun_Bi,Chenghui_Peng	2012	Global Resolution Service for mobility support in the internet.	db/conf/icnp/icnp2012.html#WangBP12
2972996	Bingyang_Liu,Jun_Bi,Yu_Zhu	2011	A deployable approach for inter-AS anti-spoofing.	db/conf/icnp/icnp2011.html#LiuBZ11
2973012	Debbie_Perouli,Timothy_G._Griffin,Olaf_Maennel,Sonia_Fahmy,Cristel_Pelsser,Alexander_J._T._Gurney,Iain_Phillips	2012	Detecting unsafe BGP policies in a flexible world.	db/conf/icnp/icnp2012.html#PerouliGMFPGP12
2973017	Xin_Zhang_0003,Zongwei_Zhou,Geoffrey_Hasker,Adrian_Perrig,Virgil_D._Gligor	2011	Network fault localization with small TCB.	db/conf/icnp/icnp2011.html#ZhangZHPG11
2973029	Youngtae_Noh,Paul_Wang,Uichin_Lee,Dustin_Torres,Mario_Gerla	2010	DOTS: A propagation Delay-aware Opportunistic MAC protocol for underwater sensor networks.	db/conf/icnp/icnp2010.html#NohWLTG10
2973037	Jiangwei_Zhou,Yu_Chen,Ben_Leong,Boqin_Feng	2010	Practical Virtual Coordinates for large wireless sensor networks.	db/conf/icnp/icnp2010.html#ZhouCLF10
2973041	Ioannis_Pefkianakis,Chi-Yu_Li,Songwu_Lu	2011	What is wrong/right with IEEE 802.11n Spatial Multiplexing Power Save feature?	db/conf/icnp/icnp2011.html#PefkianakisLL11
2973046	Honggang_Zhang,Sudarshan_Vasudevan,Ran_Li,Don_Towsley	2011	A case for coalitions in data swarming systems.	db/conf/icnp/icnp2011.html#ZhangVLT11
2973049	Andrea_G._Ribeiro,Rute_C._Sofia,Andre_Zuquete	2011	Improving mobile networks based on social mobility modeling.	db/conf/icnp/icnp2011.html#RibeiroSZ11
2973056	Ahmed_Mansy,Mostafa_H._Ammar	2011	Analysis of adaptive streaming for hybrid CDN/P2P live video systems.	db/conf/icnp/icnp2011.html#MansyA11
2973058	Shou-pon_Lin,Nicholas_F._Maxemchuk	2012	An architecture for collaborative driving systems.	db/conf/icnp/icnp2012.html#LinM12
2973060	Raimondas_Sasnauskas,Philipp_Kaiser,Russ_Lucas_Jukic,Klaus_Wehrle	2012	Integration testing of protocol implementations using symbolic distributed execution.	db/conf/icnp/icnp2012.html#SasnauskasKJW12
3081483	Xu_Cheng,Jiangchuan_Liu	2011	Load-balanced migration of social media to content clouds.	db/conf/nossdav/nossdav2011.html#ChengL11
3081487	Peter_Quax,Panagiotis_Issaris,Wouter_Vanmontfort,Wim_Lamotte	2012	Evaluation of distribution of panoramic video sequences in the eXplorative television project.	db/conf/nossdav/nossdav2012.html#QuaxIVL12
3081492	Ali_C._Begen	2012	TV everywhere.	db/conf/nossdav/nossdav2012.html#Begen12
3081499	Guntur_Ravindra,Wei_Tsang_Ooi	2012	On tile assignment for region-of-interest video streaming in a wireless LAN.	db/conf/nossdav/nossdav2012.html#RavindraO12
3081503	Ingo_Kofler,Robert_Kuschnig,Hermann_Hellwagner	2011	In-network adaptation of H.264/SVC for HD video streaming over 802.11g networks.	db/conf/nossdav/nossdav2011.html#KoflerKH11
3081506	Xiangwen_Chen,Minghua_Chen,Baochun_Li,Yao_Zhao,Yunnan_Wu,Jin_Li_0001	2011	Celerity: towards low-delay multi-party conferencing over arbitrary network topologies.	db/conf/nossdav/nossdav2011.html#ChenCLZWL11
3081524	Saamer_Akhshabi,Lakshmi_Anantakrishnan,Ali_C._Begen,Constantine_Dovrolis	2012	What happens when HTTP adaptive streaming players compete for bandwidth?	db/conf/nossdav/nossdav2012.html#AkhshabiABD12
3081527	Kristian_Evensen,Andreas_Petlund,Haakon_Riiser,Paul_Vigmostad,Dominik_Kaspar,Carsten_Griwodz,l_Halvorsen	2011	Mobile video streaming using location-based network prediction and transparent handover.	db/conf/nossdav/nossdav2011.html#EvensenPRVKGH11
3081533	vin_Huguenin,Anne-Marie_Kermarrec,Konstantinos_Kloudas,ani	2012	Content and geographical locality in user-generated content sharing systems.	db/conf/nossdav/nossdav2012.html#HugueninKKT12
3081537	Giuseppe_Reina,Ernst_Biersack,Christophe_Diot	2012	Quiver: a middleware for distributed gaming.	db/conf/nossdav/nossdav2012.html#ReinaBD12
3081548	Wu-chi_Feng	2012	Streaming media evolution: where to now?	db/conf/nossdav/nossdav2012.html#Feng12
3081554	Jairo_O._Esteban,Steven_A._Benno,Andre_Beck,Yang_Guo,Volker_Hilt,Ivica_Rimac	2012	Interactions between HTTP adaptive streaming and TCP.	db/conf/nossdav/nossdav2012.html#EstebanBBGHR12
3081574	Matteo_Varvello,Geoffrey_M._Voelker	2010	Second life: a social network of humans and bots.	db/conf/nossdav/nossdav2010.html#VarvelloV10
3081581	Fen_Zhou,Shakeel_Ahmad,Eliya_Buyukkaya,Raouf_Hamzaoui,Gwendal_Simon	2012	Minimizing server throughput for low-delay live streaming in content delivery networks.	db/conf/nossdav/nossdav2012.html#ZhouABHS12
3081586	Ransi_Nilaksha_De_Silva,Wei_Cheng,Wei_Tsang_Ooi,Shengdong_Zhao	2010	Towards understanding user tolerance to network latency and data rate in remote viewing of progressive meshes.	db/conf/nossdav/nossdav2010.html#SilvaCOZ10
3081595	Haitao_Li,Haiyang_Wang,Jiangchuan_Liu,Ke_Xu	2012	Video sharing in online social networks: measurement and analysis.	db/conf/nossdav/nossdav2012.html#LiWLX12
3081602	Xiaoqiang_Ma,Jiangchuan_Liu,Hongbo_Jiang	2011	Energy-efficient video streaming from high-speed trains.	db/conf/nossdav/nossdav2011.html#MaLJ11
3081612	Zixia_Huang,Wanmin_Wu,Klara_Nahrstedt,Md._Ahsan_Arefin,Raoul_Rivas	2010	TSync: a new synchronization framework for multi-site 3D tele-immersion.	db/conf/nossdav/nossdav2010.html#HuangWNAR10
3081623	Andrew_Jones,Keith_Mitchell,Nicholas_J._P._Race	2010	TriggerTV: exploiting social user journeys within an interactive TV system.	db/conf/nossdav/nossdav2010.html#JonesMR10
3081630	Fei_Chen,Jiangchuan_Liu,Edith_Cheuk-Han_Ngai,Yuan_Zhao	2012	Collaborative view synthesis for interactive multi-view video streaming.	db/conf/nossdav/nossdav2012.html#ChenLNZ12
3081633	Kristian_Evensen,Tomas_Kupka,Dominik_Kaspar,l_Halvorsen,Carsten_Griwodz	2010	Quality-adaptive scheduling for live streaming over multiple access networks.	db/conf/nossdav/nossdav2010.html#EvensenKKHG10
3081635	vin_Huguenin,Anne-Marie_Kermarrec,Vivek_Rai,Maarten_van_Steen	2010	Designing a tit-for-tat based peer-to-peer video-on-demand system.	db/conf/nossdav/nossdav2010.html#HugueninKRS10
3081636	Mattia_Rossi,Philip_Branch,Grenville_J._Armitage	2011	Inferring the time-zones of prefixes and autonomous systems by monitoring game server discovery traffic.	db/conf/nossdav/nossdav2011.html#RossiBA11
3081641	Wu-chi_Feng,Feng_Liu,Yuzhen_Niu,Scott_Price	2011	Systems support for stereoscopic video compression.	db/conf/nossdav/nossdav2011.html#FengLNP11
3081663	Yichuan_Wang,Xin_Liu_0002,Angela_Nicoara,Ting-An_Lin,Cheng-Hsin_Hsu	2012	SmartTransfer: transferring your mobile multimedia contents at the "right" time.	db/conf/nossdav/nossdav2012.html#WangLNLH12
3081670	Zhijie_Shen,Roger_Zimmermann	2011	LAN-awareness: improved P2P live streaming.	db/conf/nossdav/nossdav2011.html#ShenZ11
3081671	Charles_D._Estes,Ketan_Mayer-Patel	2011	Moving beyond the framebuffer.	db/conf/nossdav/nossdav2011.html#EstesM11
3081677	Xu_Cheng,Feng_Wang,Jiangchuan_Liu,Ke_Xu	2010	Collaborative delay-aware scheduling in peer-to-peer UGC video sharing.	db/conf/nossdav/nossdav2010.html#ChengWLX10
3081679	Jim_Summers,Tim_Brecht,Derek_L._Eager,Bernard_Wong	2012	To chunk or not to chunk: implications for HTTP streaming video server performance.	db/conf/nossdav/nossdav2012.html#SummersBEW12
3081680	Wu-chi_Feng,Feng_Liu	2012	Understanding the impact of inter-lens and temporal stereoscopic video compression.	db/conf/nossdav/nossdav2012.html#FengL12
3081692	Rabin_Karki,Thangam_Seenivasan,Mark_Claypool,Robert_E._Kinicki	2010	Performance analysis of home streaming video using Orb.	db/conf/nossdav/nossdav2010.html#KarkiSCK10
3081695	Guanfeng_Wang,Haiyang_Ma,Beomjoo_Seo,Roger_Zimmermann	2012	Sensor-assisted camera motion analysis and motion estimation improvement for H.264/AVC video encoding.	db/conf/nossdav/nossdav2012.html#WangMSZ12
3081697	Massimiliano_Marcon,Bimal_Viswanath,Meeyoung_Cha,P._Krishna_Gummadi	2011	Sharing social content from home: a measurement-driven feasibility study.	db/conf/nossdav/nossdav2011.html#MarconVCG11
3081712	Moonkyung_Ryu,Hyojun_Kim,Umakishore_Ramachandran	2012	Why are state-of-the-art flash-based multi-tiered storage systems performing poorly for HTTP video streaming?	db/conf/nossdav/nossdav2012.html#RyuKR12
3081723	Jim_Bankoski	2011	Intro to WebM.	db/conf/nossdav/nossdav2011.html#Bankoski11
3081726	Yao_Liu_0001,Fei_Li,Lei_Guo_0004,Songqing_Chen	2010	Reducing data request contentions for improved streaming quality.	db/conf/nossdav/nossdav2010.html#LiuLGC10
3081730	kon_Kvale_Stensland,vard_Espeland,Carsten_Griwodz,l_Halvorsen	2010	Tips, tricks and troubles: optimizing for cell and GPU.	db/conf/nossdav/nossdav2010.html#StenslandEGH10
3081731	Pooja_Agarwal,Raoul_Rivas,Wanmin_Wu,Md._Ahsan_Arefin,Zixia_Huang,Klara_Nahrstedt	2011	SAS kernel: streaming as a service kernel for correlated multi-streaming.	db/conf/nossdav/nossdav2011.html#AgarwalRWAHN11
3081734	Rohan_Gandhi,Meilin_Yang,Dimitrios_Koutsonikolas,Y._Charlie_Hu,Mary_L._Comer,Amr_Mohamed,Chih-Chun_Wang	2011	The impact of inter-layer network coding on the relative performance of MRC/MDC WiFi media delivery.	db/conf/nossdav/nossdav2011.html#GandhiYKHCMW11
3081751	rio_Ferreira,Ricardo_Morla	2010	Second life in-world action traffic modeling.	db/conf/nossdav/nossdav2010.html#FerreiraM10
3081757	Hao_Hu,Yang_Guo,Yong_Liu	2010	Mesh-based peer-to-peer layered video streaming with taxation.	db/conf/nossdav/nossdav2010.html#HuGL10
3081766	Kunfeng_Lai,Dan_Wang	2010	Towards understanding the external links of video sharing sites: measurement and analysis.	db/conf/nossdav/nossdav2010.html#LaiW10
3081774	Osama_Abboud,Konstantin_Pussep,Dominik_Stingl,Ralf_Steinmetz	2011	Media-aware networking for SVC-based P2P streaming.	db/conf/nossdav/nossdav2011.html#AbboudPSS11
3081775	Maxim_Graubner,Parag_S._Mogre,Ralf_Steinmetz,Thorsten_Lorenzen	2010	A new QoE model and evaluation method for broadcast audio contribution over IP.	db/conf/nossdav/nossdav2010.html#GraubnerMSL10
3081776	Yao_Liu_0001,Fei_Li,Lei_Guo_0004,Songqing_Chen	2011	A measurement study of resource utilization in internet mobile streaming.	db/conf/nossdav/nossdav2011.html#LiuLGC11
3081793	Klara_Nahrstedt	2010	Active 4d tele-vision.	db/conf/nossdav/nossdav2010.html#Nahrstedt10
3081799	Muhammad_Ali_Akbar,Muddassar_Farooq	2010	RTP-miner: a real-time security framework for RTP fuzzing attacks.	db/conf/nossdav/nossdav2010.html#AkbarF10
3081801	Bo_Gao,Jack_Jansen,sar,Dick_C._A._Bulterman	2011	Accurate and low-delay seeking within and across mash-ups of highly-compressed videos.	db/conf/nossdav/nossdav2011.html#GaoJCB11
3081806	Di_Niu,Baochun_Li,Shuqiao_Zhao	2011	Understanding demand volatility in large VoD systems.	db/conf/nossdav/nossdav2011.html#NiuLZ11
3081817	Alexander_Eichhorn,Pengpeng_Ni,Ragnhild_Eg	2010	Randomised pair comparison: an economic and robust method for audiovisual quality assessment.	db/conf/nossdav/nossdav2010.html#EichhornNE10
3081829	Xu_Cheng,Jiangchuan_Liu	2010	Tweeting videos: coordinate live streaming and storage sharing.	db/conf/nossdav/nossdav2010.html#ChengL10
3081830	Yuan_Zhao,Lei_Zhang,Xiaoqiang_Ma,Jiangchuan_Liu,Hongbo_Jiang	2012	CAME: cloud-assisted motion estimation for mobile video compression and transmission.	db/conf/nossdav/nossdav2012.html#ZhaoZMLJ12
3081831	Javier_Taibo,as,Pablo_Montero,Samuel_Rivas	2011	GPU-based fast motion estimation for on-the-fly encoding of computer-generated video streams.	db/conf/nossdav/nossdav2011.html#TaiboGMR11
3081833	Zhenhua_Li,Yan_Huang,Gang_Liu,Fuchen_Wang,Zhi-Li_Zhang,Yafei_Dai	2012	Cloud transcoder: bridging the format and resolution gap between internet videos and mobile devices.	db/conf/nossdav/nossdav2012.html#LiHLWZD12
3081840	Christian_Hoene,Patrick_Schreiner	2011	A DTN mode for reliable internet telephony.	db/conf/nossdav/nossdav2011.html#HoeneS11
3081843	Zakwan_Al-Arnaout,Qiang_Fu,Marcus_Frean	2012	A content replication scheme for wireless mesh networks.	db/conf/nossdav/nossdav2012.html#Al-ArnaoutFF12
3081849	Jeremy_Guebert,Dwight_J._Makaroff,Ketan_Mayer-Patel	2010	Request generation for a peer-based PVR.	db/conf/nossdav/nossdav2010.html#GuebertMM10
3081851	Surendar_Chandra	2010	Wireless network interface energy conservation for bottlenecked first mile networks.	db/conf/nossdav/nossdav2010.html#Chandra10
3081869	David_A._Hayes,Michael_Welzl,Grenville_J._Armitage,Mattia_Rossi	2011	Improving HTTP performance using "stateless" TCP.	db/conf/nossdav/nossdav2011.html#HayesWAR11
3081871	Shujie_Liu_0001,Chang_Wen_Chen	2011	Scalable video transmission: packet loss induced distortion modeling and estimation.	db/conf/nossdav/nossdav2011.html#LiuC11
3081873	nio_Rodrigues,Nuno_Roma,Leonel_Sousa	2010	p264: open platform for designing parallel H.264/AVC video encoders on multi-core systems.	db/conf/nossdav/nossdav2010.html#RodriguesRS10
3081879	Raymond_Sweha,Donald_E._Smith,James_H._Drew	2011	Managing home and network storage of television recordings: "I filled my DVR again! Now what?".	db/conf/nossdav/nossdav2011.html#SwehaSD11
3081880	Weidong_Shi,Yang_Lu	2010	Video indexed VM continuous checkpoints: time travel support for virtual 3d graphics applications.	db/conf/nossdav/nossdav2010.html#ShiL10
3248832	Sungwon_Yang,Jihyoung_Kim,Mario_Gerla	2012	Clinical quality guaranteed physiological data compression in mobile health monitoring.	db/conf/mobihoc/mh2012.html#YangKG12
3248837	Ming_Ouyang,Lei_Ying	2010	On optimal feedback allocation in multichannel wireless downlinks.	db/conf/mobihoc/mobihoc2010.html#OuyangY10
3248841	Xu_Chen,Jianwei_Huang	2012	Spatial spectrum access game: nash equilibria and distributed learning.	db/conf/mobihoc/mobihoc2012.html#ChenH12
3248842	Hermann_S._Lichte,Hannes_Frey,Holger_Karl	2010	Fading-resistant low-latency broadcasts in wireless multihop networks: the probabilistic cooperation diversity approach.	db/conf/mobihoc/mobihoc2010.html#LichteFK10
3248850	Dongsheng_Chen,Alireza_Babaei,Prathima_Agrawal	2012	Reliable link lifetime-based cluster-head election in wireless ad hoc networks.	db/conf/mobihoc/mobihoc2012.html#ChenBA12
3248851	I-Hong_Hou,P._R._Kumar	2011	Broadcasting delay-constrained traffic over unreliable wireless links with network coding.	db/conf/mobihoc/mobihoc2011.html#HouK11
3248862	Avik_Ghose,Chirabrata_Bhaumik,Diptesh_Das,Amit_Kumar_Agrawal	2012	Mobile healthcare infrastructure for home and small clinic.	db/conf/mobihoc/mh2012.html#GhoseBDA12
3248886	Gaurav_S._Kasbekar,Saswati_Sarkar	2010	Spectrum pricing games with bandwidth uncertainty and spatial reuse in cognitive radio networks.	db/conf/mobihoc/mobihoc2010.html#KasbekarS10
3248889	Andrew_Symington,Niki_Trigoni	2012	Encounter based sensor tracking.	db/conf/mobihoc/mobihoc2012.html#SymingtonT12
3248911	Lu_Su,Yan_Gao,Yong_Yang,Guohong_Cao	2011	Towards optimal rate allocation for data aggregation in wireless sensor networks.	db/conf/mobihoc/mobihoc2011.html#SuGYC11
3248925	Long_Bao_Le,Eytan_Modiano,Changhee_Joo,Ness_B._Shroff	2010	Longest-queue-first scheduling under SINR interference model.	db/conf/mobihoc/mobihoc2010.html#LeMJS10
3248931	Yan_Qiao,Shigang_Chen,Tao_Li,Shiping_Chen	2011	Energy-efficient polling protocols in RFID systems.	db/conf/mobihoc/mobihoc2011.html#QiaoCLC11
3248934	Troy_A._Johnson,Patrick_Seeling	2012	Localization using bluetooth device names.	db/conf/mobihoc/mobihoc2012.html#JohnsonS12
3248938	Wen_Luo,Shigang_Chen,Tao_Li,Yan_Qiao	2012	Probabilistic missing-tag detection and energy-time tradeoff in large-scale RFID systems.	db/conf/mobihoc/mobihoc2012.html#LuoCLQ12
3248946	M._H._R._Khouzani,Soheil_Eshghi,Saswati_Sarkar,Ness_B._Shroff,Santosh_S._Venkatesh	2012	in DTNs.	db/conf/mobihoc/mobihoc2012.html#KhouzaniESSV12
3248949	Arun_Chhetri,Huy_Anh_Nguyen,Gabriel_Scalosub,Rong_Zheng	2010	On quality of monitoring for multi-channel wireless infrastructure networks.	db/conf/mobihoc/mobihoc2010.html#ChhetriNSZ10
3248950	Karthikeyan_Sundaresan,Sampath_Rangarajan	2011	Scheduling algorithms for video multicasting with channel diversity in wireless OFDMA networks.	db/conf/mobihoc/mobihoc2011.html#SundaresanR11
3248953	Konstantinos_Kleisouris,Bernhard_Firner,Richard_E._Howard,Yanyong_Zhang,Richard_P._Martin	2010	Detecting intra-room mobility with signal strength descriptors.	db/conf/mobihoc/mobihoc2010.html#KleisourisFHZM10
3248957	N._K._Vuong,Syin_Chan,Chiew_Tong_Lau,K._M._Lau	2011	Feasibility study of a real-time wandering detection algorithm for dementia patients.	db/conf/mobihoc/mh2011.html#VuongCLL11
3248959	Andreas_Weder,M._Pietzsch,Sebastian_Zaunseder,Martin_Zimmerling,Steffen_Netz	2011	A mobile system for precise wireless pulse transit time (PTT) monitoring.	db/conf/mobihoc/mh2011.html#WederPZZN11
3248966	Lei_Yang_0001,Yalin_Evren_Sagduyu,Jason_Hongjun_Li	2012	Adaptive network coding for scheduling real-time traffic with hard deadlines.	db/conf/mobihoc/mobihoc2012.html#YangSL12
3248972	Navid_Hamed_Azimi,Himanshu_Gupta,Xiaoxiao_Hou,Jie_Gao	2010	Data preservation under spatial failures in sensor networks.	db/conf/mobihoc/mobihoc2010.html#AzimiGHG10
3248973	Yi_Wang_0014,Guohong_Cao	2011	Barrier coverage in camera sensor networks.	db/conf/mobihoc/mobihoc2011.html#WangC11
3248974	Antonio_Carzaniga,Koorosh_Khazaei,Fabian_Kuhn	2012	Oblivious low-congestion multicast routing in wireless networks.	db/conf/mobihoc/mobihoc2012.html#CarzanigaKK12
3248985	Mustafa_Y._Arslan,Karthikeyan_Sundaresan,Srikanth_V._Krishnamurthy,Sampath_Rangarajan	2012	Design and implementation of an integrated beamformer and uplink scheduler for OFDMA femtocells.	db/conf/mobihoc/mobihoc2012.html#ArslanSKR12
3248986	Peng-Jun_Wan,XiaoHua_Xu,Zhu_Wang	2011	Wireless coverage with disparate ranges.	db/conf/mobihoc/mobihoc2011.html#WanXW11
3248989	Muhammad_Shoaib_Saleem,Eric_Renault	2012	Price-reward for data relaying and handover management in wireless networks.	db/conf/mobihoc/mobihoc2012.html#SaleemR12
3249004	Dejun_Yang,Xi_Fang,Guoliang_Xue	2011	Truthful auction for cooperative communications.	db/conf/mobihoc/mobihoc2011.html#YangFX11
3249005	Nitin_H._Vaidya	2012	Resilient distributed consensus.	db/conf/mobihoc/mobihoc2012.html#Vaidya12
3249007	Gabriel_Yik_Keung,Bo_Li_0001,Qian_Zhang	2010	The intrusion detection in mobile sensor network.	db/conf/mobihoc/mobihoc2010.html#KeungLZ10
3249035	Fung_Po_Tso,Jin_Teng,Weijia_Jia,Dong_Xuan	2010	Mobility: a double-edged sword for HSPA networks: a large-scale test on Hong Kong mobile HSPA networks.	db/conf/mobihoc/mobihoc2010.html#TsoTJX10
3249040	Bernhard_Firner,Chenren_Xu,Richard_E._Howard,Yanyong_Zhang	2010	Multiple receiver strategies for minimizing packet loss in dense sensor networks.	db/conf/mobihoc/mobihoc2010.html#FirnerXHZ10
3249048	Xinyu_Zhang,Kang_G._Shin	2011	Enabling coexistence of heterogeneous wireless systems: case for ZigBee and WiFi.	db/conf/mobihoc/mobihoc2011.html#ZhangS11
3249051	Debopam_Acharya,Vijay_Kumar_0002,Hoo-Joo_Han	2012	Performance evaluation of data intensive mobile healthcare test-bed in a 4G environment.	db/conf/mobihoc/mh2012.html#AcharyaKH12
3249055	Jung_Woo_Lee,Branislav_Kusy,Tahir_Azim,Basem_Shihada,Philip_Levis	2010	Whirlpool routing for mobility.	db/conf/mobihoc/mobihoc2010.html#LeeKASL10
3249058	Karthikeyan_Sundaresan,Sampath_Rangarajan	2010	Cooperation vs. multiplexing: multicast scheduling algorithms for ofdma relay networks.	db/conf/mobihoc/mobihoc2010.html#SundaresanR10
3249071	Edward_W._Knightly	2012	Urban-scale wireless networks in unlicensed sub-GHz bands.	db/conf/mobihoc/mobihoc2012.html#Knightly12
3249075	You_Xu,Abusayeed_Saifullah,Yixin_Chen,Chenyang_Lu,Sangeeta_Bhattacharya	2010	Near optimal multi-application allocation in shared sensor networks.	db/conf/mobihoc/mobihoc2010.html#XuSCLB10
3249083	Roozbeh_Jafari	2012	The challenges and opportunities in wireless health.	db/conf/mobihoc/mh2012.html#Jafari12
3249098	inen,Christophe_Diot	2012	Dissemination in opportunistic social networks: the role of temporal communities.	db/conf/mobihoc/mobihoc2012.html#PietilanenD12
3249100	Cong_Shi,Vasileios_Lakafosis,Mostafa_H._Ammar,Ellen_W._Zegura	2012	Serendipity: enabling remote computing among intermittently connected mobile devices.	db/conf/mobihoc/mobihoc2012.html#ShiLAZ12
3249101	Boying_Zhang,Jin_Teng,Junda_Zhu,Xinfeng_Li,Dong_Xuan,Yuan_F._Zheng	2012	EV-Loc: integrating electronic and visual signals for accurate localization.	db/conf/mobihoc/mobihoc2012.html#ZhangTZLXZ12
3249112	a_W._Richa,Christian_Scheideler,Stefan_Schmid,Jin_Zhang	2011	Self-stabilizing leader election for single-hop wireless networks despite jamming.	db/conf/mobihoc/mobihoc2011.html#RichaSSZ11
3249116	Amitangshu_Pal,Asis_Nasipuri	2012	A distributed channel selection scheme for multi-channelwireless sensor networks.	db/conf/mobihoc/mobihoc2012.html#PalN12
3249119	Xiaohui_Liu,Hongwei_Zhang,Qiao_Xiang,Xin_Che,Xi_Ju	2012	Taming uncertainties in real-time routing for wireless networked sensing and control.	db/conf/mobihoc/mobihoc2012.html#LiuZXCJ12
3249126	Longbo_Huang,Michael_J._Neely	2011	Utility optimal scheduling in energy harvesting networks.	db/conf/mobihoc/mobihoc2011.html#HuangN11
3249132	Yang_Liu,Robert_Kelley,Phani_C._Polina,Sunderesh_S._Heragu,Anup_Kumar	2011	iResTrac: an architecture for maintaining medical resource status with mobile devices.	db/conf/mobihoc/mh2011.html#LiuKPHK11
3249136	Dirk_de_Jager,Alex_L._Wood,Geoff_V._Merrett,Bashir_M._Al-Hashimi,Kieron_O'Hara,Nigel_R._Shadbolt,Wendy_Hall	2011	A low-power, distributed, pervasive healthcare system for supporting memory.	db/conf/mobihoc/mh2011.html#JagerWMAOSH11
3249144	Wei_Gao,Guohong_Cao	2010	Fine-grained mobility characterization: steady and transient state behaviors.	db/conf/mobihoc/mobihoc2010.html#GaoC10
3249173	Zhenhua_Liu,Hongbo_Liu,Wenyuan_Xu,Yingying_Chen_0001	2012	Extracting jamming signals to locate radio interferers and jammers.	db/conf/mobihoc/mobihoc2012.html#LiuLXC12
3249176	Saadi_Boudjit,Nadjim_Chelghoum,Miloud_Otsmani,Salim_Allal	2011	Multi-sensors' data gathering management system for a wireless health monitoring platform.	db/conf/mobihoc/mh2011.html#BoudjitCOA11
3249195	Ka-Lok_Hung,Brahim_Bensaou	2010	Distributed rate control and contention resolution in multi-cell IEEE 802.11 wlans with hidden terminals.	db/conf/mobihoc/mobihoc2010.html#HungB10
3249201	Theus_Hossmann,Thrasyvoulos_Spyropoulos,Franck_Legendre	2011	Putting contacts into context: mobility modeling beyond inter-contact times.	db/conf/mobihoc/mobihoc2011.html#HossmannSL11
3249210	Anne-Marie_Kermarrec,Guang_Tan	2010	Greedy geographic routing in large-scale sensor networks: a minimum network decomposition approach.	db/conf/mobihoc/mobihoc2010.html#KermarrecT10
3249226	ler,Matthias_Wolff,Wolf-Joachim_Fischer	2011	Food intake recognition conception for wearable devices.	db/conf/mobihoc/mh2011.html#PasslerWF11
3249238	Sangki_Yun,Hyogon_Kim	2010	Rate diverse network coding: breaking the broadcast bottleneck.	db/conf/mobihoc/mobihoc2010.html#YunK10
3249252	Revak_R._Tyagi,Ki-Dong_Lee,Frank_Aurzada,Sang_G._Kim,Martin_Reisslein	2012	Efficient delivery of frequent small data for U-healthcare applications over LTE-advanced networks.	db/conf/mobihoc/mh2012.html#TyagiLAKR12
3249258	Ferdaus_Ahmed_Kawsar,Md_Munirul_Haque,Mohammad_Adibuzzaman,Sheikh_Iqbal_Ahamed,Md._Uddin,Richard_Love,David_Roe,Rumana_Dowla,Tahmina_Ferdousy,Reza_Selim,Syed_Hossain	2012	e-ESAS: improving quality of life for breast cancer patients in developing countries.	db/conf/mobihoc/mh2012.html#KawsarHAAULRDFS12
3249264	Lingmei_Ren,Quan_Zhang,Weisong_Shi	2012	Low-power fall detection in home-based environments.	db/conf/mobihoc/mh2012.html#RenZS12
3249267	Sudarshan_Vasudevan,Dennis_Goeckel,Donald_F._Towsley	2010	Security-capacity trade-off in large wireless networks using keyless secrecy.	db/conf/mobihoc/mobihoc2010.html#VasudevanGT10
3249280	Wei_Zeng,Sudarshan_Vasudevan,Xian_Chen,Bing_Wang,Alexander_Russell,Wei_Wei_0001	2011	Neighbor discovery in wireless networks with multipacket reception.	db/conf/mobihoc/mobihoc2011.html#ZengVCWRW11
3249291	Swaminathan_Sankararaman,A._Karim_Abu-Affash,Alon_Efrat,Sylvester_David_Eriksson-Bique,Valentin_Polishchuk,Srinivasan_Ramasubramanian,Michael_Segal	2012	Optimization schemes for protective jamming.	db/conf/mobihoc/mobihoc2012.html#SankararamanAEEPRS12
3249292	Su_Xia,Xiaotian_Yin,Hongyi_Wu,Miao_Jin,Xianfeng_David_Gu	2011	Deterministic greedy routing with guaranteed delivery in 3D wireless sensor networks.	db/conf/mobihoc/mobihoc2011.html#XiaYWJG11
3249298	Ting_He,Kang-Won_Lee,Ananthram_Swami	2010	Flying in the dark: controlling autonomous data ferries with partial observations.	db/conf/mobihoc/mobihoc2010.html#HeLS10
3249305	Lei_Tang,Yanjun_Sun,Omer_Gurewitz,David_B._Johnson	2011	EM-MAC: a dynamic multichannel energy-efficient MAC protocol for wireless sensor networks.	db/conf/mobihoc/mobihoc2011.html#TangSGJ11
3249306	Mohammad_S._Hashemian,Dylan_L._Knowles,Jonathan_Calver,Weicheng_Qian,Michael_C._Bullock,Scott_Bell,Regan_L._Mandryk,Nathaniel_D._Osgood,Kevin_G._Stanley	2012	iEpi: an end to end solution for collecting, conditioning and utilizing epidemiologically relevant data.	db/conf/mobihoc/mh2012.html#HashemianKCQBBM12
3249319	Ki-Dong_Lee,Athanasios_V._Vasilakos	2011	Managing resources for healthcare service calls in a cellular network with relays and machine-type communication nodes.	db/conf/mobihoc/mh2011.html#LeeV11
3249325	Shaojie_Tang,XuFei_Mao,Taeho_Jung,Junze_Han,Xiang-Yang_Li,Boliu_Xu,Chao_Ma	2012	Closing the gap in the multicast capacity of hybrid wireless networks.	db/conf/mobihoc/mobihoc2012.html#TangMJHLXM12
3249326	Muhammad_Ahmed,Xu_Huang,Dharmendra_Sharma	2012	A novel misbehavior evaluation with dempster-shafer theory in wireless sensor networks.	db/conf/mobihoc/mobihoc2012.html#AhmedHS12
3249342	Amitabha_Ghosh,Ying-Kei_Hui,Mung_Chiang	2011	Model-based architecture analysis for wireless healthcare.	db/conf/mobihoc/mh2011.html#GhoshHC11
3249347	Krishna_P._Jagannathan,Ishai_Menache,Gil_Zussman,Eytan_Modiano	2011	Non-cooperative spectrum access: the dedicated vs. free spectrum choice.	db/conf/mobihoc/mobihoc2011.html#JagannathanMZM11
3249349	Sang-Seon_Byun,Ilangko_Balasingham,Athanasios_V._Vasilakos	2011	A market-clearing model for spectrum trade in cognitive radio networks.	db/conf/mobihoc/mobihoc2011.html#ByunBV11
3249359	Mi_Kyung_Han,Apurv_Bhartia,Lili_Qiu,Eric_Rozner	2011	O3: optimized overlay-based opportunistic routing.	db/conf/mobihoc/mobihoc2011.html#HanBQR11
3249368	Ting_He,Ananthram_Swami,Kang-Won_Lee	2011	Dispatch-and-search: dynamic multi-ferry control in partitioned mobile networks.	db/conf/mobihoc/mobihoc2011.html#HeSL11
3249385	Keisuke_Sodeyama,Ryuji_Kohno	2011	Low duty-cycle UWB communications design for body area network.	db/conf/mobihoc/mh2011.html#SodeyamaK11
3249394	Xue_Zhang,Haigang_Gong,Ming_Liu,Sanglu_Lu,Jie_Wu_0001	2010	Quantitative analysis of the effect of transmitting power on the capacity of wireless ad hoc networks.	db/conf/mobihoc/mobihoc2010.html#ZhangGLLW10
3249395	Gustavo_Marfia,Marco_Roccetti,Claudio_E._Palazzi,Alessandro_Amoroso	2011	Efficient vehicle-to-pedestrian exchange of medical data: an empirical model with preliminary results.	db/conf/mobihoc/mh2011.html#MarfiaRPA11
3249399	Kai_Han,Liu_Xiang,Jun_Luo,Yang_Liu	2012	Minimum-energy connected coverage in wireless sensor networks with omni-directional and directional features.	db/conf/mobihoc/mobihoc2012.html#HanXLL12
3249400	Kyle_Miller,Atresh_Sanne,Kannan_Srinivasan,Sriram_Vishwanath	2012	Enabling real-time interference alignment: promises and challenges.	db/conf/mobihoc/mobihoc2012.html#MillerSSV12
3249420	Guanhong_Pei,Anil_Vullikanti	2012	Low-complexity scheduling for wireless networks.	db/conf/mobihoc/mobihoc2012.html#PeiV12
3249421	Haifan_Yao,Sheng_Zhong	2011	Towards cheat-proof cooperative relay for cognitive radio networks.	db/conf/mobihoc/mobihoc2011.html#YaoZ11
3249436	Jerrid_Matthews,Farnoosh_Javadi,Gauresh_Rane,Jason_Zheng,Giovanni_Pau,Mario_Gerla	2012	Ultraviolet guardian - real time ultraviolet monitoring: estimating the pedestrians ultraviolet exposure before stepping outdoors.	db/conf/mobihoc/mh2012.html#MatthewsJRZPG12
3249448	Xiaomeng_Ban,Rik_Sarkar,Jie_Gao	2011	Local connectivity tests to identify wormholes in wireless networks.	db/conf/mobihoc/mobihoc2011.html#BanSG11
3249450	Stefano_Avallone	2011	Turning off radios to save power in multi-radio wireless mesh networks.	db/conf/mobihoc/mobihoc2011.html#Avallone11
3249452	Bo_Han,Aravind_Srinivasan	2012	Your friends have more friends than you do: identifying influential mobile users through random walks.	db/conf/mobihoc/mobihoc2012.html#HanS12
3249453	Peng-Jun_Wan,XiaoHua_Xu,Zhu_Wang,Shaojie_Tang,Zhiguo_Wan	2012	Stability analyses of longest-queue-first link scheduling in MC-MR wireless networks.	db/conf/mobihoc/mobihoc2012.html#WanXWTW12
3249454	Nabeel_Ahmed,Srinivasan_Keshav,Konstantina_Papagiannaki	2011	OmniVoice: a mobile voice solution for small-scale enterprises.	db/conf/mobihoc/mobihoc2011.html#AhmedKP11
3249455	Lei_Yang_0020,Zengbin_Zhang,Ben_Y._Zhao,Christopher_Kruegel,Haitao_Zheng	2012	Enforcing dynamic spectrum access with spectrum permits.	db/conf/mobihoc/mobihoc2012.html#YangZZKZ12
3249458	Abdallah_Khreishah,Issa_M._Khalil,Jie_Wu_0001	2012	Distributed network coding-based opportunistic routing for multicast.	db/conf/mobihoc/mobihoc2012.html#KhreishahKW12
3249463	I-Hong_Hou,P._R._Kumar	2010	Utility-optimal scheduling in time-varying wireless networks with delay constraints.	db/conf/mobihoc/mobihoc2010.html#HouK10
3249464	Sangkil_Kim,Yoshihiro_Kawahara,Manos_M._Tentzeris	2012	Inkjet-printed monopole antennas for enhanced-range WBAN and wearable biomonitoring application.	db/conf/mobihoc/mh2012.html#KimKT12
3249474	Tao_Li,Shigang_Chen,Yibei_Ling	2010	Identifying the missing tags in a large RFID system.	db/conf/mobihoc/mobihoc2010.html#LiCL10
3249480	Feng_Li,Jun_Luo,Chi_Zhang,Shi-Qing_Xin,Ying_He_0001	2011	UNFOLD: uniform fast on-line boundary detection for dynamic 3D wireless sensor networks.	db/conf/mobihoc/mobihoc2011.html#LiLZXH11
3249490	Parth_H._Pathak,Sankalp_Nimbhorkar,Rudra_Dutta	2012	Channel width assignment using relative backlog: extending back-pressure to physical layer.	db/conf/mobihoc/mobihoc2012.html#PathakND12
3249494	Jongwon_Yoon,Mustafa_Y._Arslan,Karthikeyan_Sundaresan,Srikanth_V._Krishnamurthy,Suman_Banerjee	2012	A distributed resource management framework for interference mitigation in OFDMA femtocell networks.	db/conf/mobihoc/mobihoc2012.html#YoonASKB12
3249519	Xia_Zhou,Haitao_Zheng	2010	Breaking bidder collusion in large-scale spectrum auctions.	db/conf/mobihoc/mobihoc2010.html#ZhouZ10
3249520	Srikanth_Hariharan,Ness_B._Shroff	2011	On optimal energy efficient convergecasting in unreliable sensor networks with applications to target tracking.	db/conf/mobihoc/mobihoc2011.html#HariharanS11
3249526	Rufeng_Meng,Jason_Isenhower,Chuan_Qin,Srihari_Nelakuditi	2012	Can smartphone sensors enhance kinect experience?	db/conf/mobihoc/mobihoc2012.html#MengIQN12
3249542	Simon_Heimlicher,Salamatian	2010	Globs in the primordial soup: the emergence of connected crowds in mobile wireless networks.	db/conf/mobihoc/mobihoc2010.html#HeimlicherS10
3249548	Anirudh_Badam,Michael_Kaminsky,Dongsu_Han,Konstantina_Papagiannaki,David_G._Andersen,Srinivasan_Seshan	2011	The hare and the tortoise: taming wireless losses by exploiting wired reliability.	db/conf/mobihoc/mobihoc2011.html#BadamKHPAS11
3249549	Shailendra_Singh,Moloud_Shahbazi,Konstantinos_Pelechrinis,Karthikeyan_Sundaresan,Srikanth_V._Krishnamurthy,Sateesh_Addepalli	2012	A case for adaptive sub-carrier level power allocation in OFDMA networks.	db/conf/mobihoc/mobihoc2012.html#SinghSPSKA12
3249561	Yang_Yang_0010,Ness_B._Shroff	2012	Throughput of rateless codes over broadcast erasure channels.	db/conf/mobihoc/mobihoc2012.html#YangS12
3249562	Jerry_T._Chiang,Dongho_Kim,Yih-Chun_Hu	2012	JIM-beam: using spatial randomness to build jamming-resilient wireless flooding networks.	db/conf/mobihoc/mobihoc2012.html#ChiangKH12
3249573	Anwar_Saipulla,Benyuan_Liu,Guoliang_Xing,Xinwen_Fu,Jie_Wang_0002	2010	Barrier coverage with sensors of limited mobility.	db/conf/mobihoc/mobihoc2010.html#SaipullaLXFW10
3249584	Guang_Tan,Hongbo_Jiang,Shengkai_Zhang,Anne-Marie_Kermarrec	2010	Connectivity-based and anchor-free localization in large-scale 2d/3d sensor networks.	db/conf/mobihoc/mobihoc2010.html#TanJZK10
3249594	Sanjeev_Singh,Srihari_Nelakuditi,Romit_Roy_Choudhury,Yang_Tong	2012	Your smartphone can watch the road and you: mobile assistant for inattentive drivers.	db/conf/mobihoc/mobihoc2012.html#SinghNCT12
3249596	Zhuotao_Liu,Xinbing_Wang,Wentao_Luan,Songwu_Lu	2012	Transmission delay in large scale ad hoc cognitive radio networks.	db/conf/mobihoc/mobihoc2012.html#LiuWLL12
3249602	M._Chuah,Steve_Sample	2011	Fitness Tour: a mobile application for combating obesity.	db/conf/mobihoc/mh2011.html#ChuahS11
3249619	Mubashir_Husain_Rehmani,s,phane_Lohier,Abderrezak_Rachedi,Benoit_Poussot	2012	Towards intelligent antenna selection in IEEE 802.15.4 wireless sensor networks.	db/conf/mobihoc/mobihoc2012.html#RehmaniALRP12
3249623	Matteo_Giuberti,Ã²,Gianluigi_Ferrari	2011	Fingerprinting-based wireless 3D localization for motion capture applications.	db/conf/mobihoc/mh2011.html#GiubertiMF11
3499530	Steven_Bauer,Robert_Beverly,Arthur_W._Berger	2011	Measuring the state of ECN readiness in servers, clients, and routers.	db/conf/imc/imc2011.html#BauerBB11
3499533	Yang_Xu,Chenguang_Yu,Jingjiang_Li,Yong_Liu	2012	Video telephony for end-consumers: measurement study of Google+, iChat, and Skype.	db/conf/imc/imc2012.html#XuYLL12
3499538	Narseo_Vallina-Rodriguez,Jay_Shah,Alessandro_Finamore,Yan_Grunenberger,Konstantina_Papagiannaki,Hamed_Haddadi,Jon_Crowcroft	2012	Breaking for commercials: characterizing mobile advertising.	db/conf/imc/imc2012.html#Vallina-RodriguezSFGPHC12
3499544	Varun_Khare,Qing_Ju,Beichuan_Zhang	2012	Concurrent prefix hijacks: occurrence and impacts.	db/conf/imc/imc2012.html#KhareJZ12
3499559	Sajjad_Zarifzadeh,Madhwaraj_Gowdagere,Constantine_Dovrolis	2012	Range tomography: combining the practicality of boolean tomography with the resolution of analog tomography.	db/conf/imc/imc2012.html#ZarifzadehGD12
3499560	Partha_Kanuparthy,Constantine_Dovrolis	2011	ShaperProbe: end-to-end detection of ISP traffic shaping using active methods.	db/conf/imc/imc2011.html#KanuparthyD11
3499577	Justine_Sherry,Ethan_Katz-Bassett,Mary_Pimenova,Harsha_V._Madhyastha,Thomas_E._Anderson,Arvind_Krishnamurthy	2010	Resolving IP aliases with prespecified timestamps.	db/conf/imc/imc2010.html#SherryKPMAK10
3499581	Hongyu_Gao,Jun_Hu,Christo_Wilson,Zhichun_Li,Yan_Chen,Ben_Y._Zhao	2010	Detecting and characterizing social spam campaigns.	db/conf/imc/imc2010.html#GaoHWLCZ10
3499590	Denisa_Ghita,Katerina_J._Argyraki,Patrick_Thiran	2010	Network tomography on correlated links.	db/conf/imc/imc2010.html#GhitaAT10
3499591	Pralhad_Deshpande,Xiaoxiao_Hou,Samir_R._Das	2010	Performance comparison of 3G and metro-scale WiFi for vehicular network access.	db/conf/imc/imc2010.html#DeshpandeHD10
3499596	Tobias_Flach,Ethan_Katz-Bassett,Ramesh_Govindan	2012	Quantifying violations of destination-based forwarding on the internet.	db/conf/imc/imc2012.html#FlachKG12
3499597	rsun,Natali_Ruchansky,Evimaria_Terzi,Mark_Crovella	2012	Routing state distance: a path-based metric for network analysis.	db/conf/imc/imc2012.html#GursunRTC12
3499600	Gyarmati,Rade_Stanojevic,Michael_Sirivianos,Nikolaos_Laoutaris	2012	Sharing the cost of backbone networks: cui bono?	db/conf/imc/imc2012.html#GyarmatiSSL12
3499605	Vijay_Kumar_Adhikari,Sourabh_Jain,Zhi-Li_Zhang	2010	YouTube traffic dynamics and its interplay with a tier-1 ISP: an ISP perspective.	db/conf/imc/imc2010.html#AdhikariJZ10
3499616	Derek_Leonard,Dmitri_Loguinov	2010	Demystifying service discovery: implementing an internet-wide scanner.	db/conf/imc/imc2010.html#LeonardL10
3499619	M._Engin_Tozal,Ã§	2010	TraceNET: an internet topology data collector.	db/conf/imc/imc2010.html#TozalS10
3499622	o,Dario_Rossi,Francesco_Gringoli,Lorenzo_Nava,Luca_Salgarelli,Javier_Aracil	2012	Wire-speed statistical classification of network traffic on commodity hardware.	db/conf/imc/imc2012.html#RioRGNSA12
3499624	Patrick_Wendell,Michael_J._Freedman	2011	Going viral: flash crowds in an open CDN.	db/conf/imc/imc2011.html#WendellF11
3499627	Amogh_Dhamdhere,Matthew_J._Luckie,Bradley_Huffaker,kc_claffy,Ahmed_Elmokashfi,Emile_Aben	2012	Measuring the deployment of IPv6: topology, routing and performance.	db/conf/imc/imc2012.html#DhamdhereLHcEA12
3499628	Christian_Kreibich,Nicholas_Weaver,Chris_Kanich,Weidong_Cui,Vern_Paxson	2011	GQ: practical containment for measuring modern malware systems.	db/conf/imc/imc2011.html#KreibichWKCP11
3499630	Han_Hee_Song,Zihui_Ge,Ajay_Mahimkar,Jia_Wang,Jennifer_Yates,Yin_Zhang,Andrea_Basso,Min_Chen	2011	Q-score: proactive service quality assessment in a large IPTV system.	db/conf/imc/imc2011.html#SongGMWYZBC11
3499634	Joel_Sommers,Paul_Barford,Brian_Eriksson	2011	On the prevalence and characteristics of MPLS deployments in the open internet.	db/conf/imc/imc2011.html#SommersBE11
3499635	Haiqing_Jiang,Yaogong_Wang,Kyunghan_Lee,Injong_Rhee	2012	Tackling bufferbloat in 3G/4G networks.	db/conf/imc/imc2012.html#JiangWLR12
3499636	Hossein_Falaki,Dimitrios_Lymberopoulos,Ratul_Mahajan,Srikanth_Kandula,Deborah_Estrin	2010	A first look at traffic on smartphones.	db/conf/imc/imc2010.html#FalakiLMKE10
3499654	Ingmar_Poese,Benjamin_Frank,Bernhard_Ager,Georgios_Smaragdakis,Anja_Feldmann	2010	Improving content delivery using provider-aided distance information.	db/conf/imc/imc2010.html#PoeseFASF10
3499655	Jelena_Mirkovic,Hao_Shi,Alefiya_Hussain	2012	Reducing allocation errors in network testbeds.	db/conf/imc/imc2012.html#MirkovicSH12
3499657	Jia_Zhou,Yanhua_Li,Vijay_Kumar_Adhikari,Zhi-Li_Zhang	2011	Counting YouTube videos via random prefix sampling.	db/conf/imc/imc2011.html#ZhouLAZ11
3499658	Brian_Eriksson,Paul_Barford,Rhys_Alistair_Bowden,Nick_G._Duffield,Joel_Sommers,Matthew_Roughan	2010	BasisDetect: a model-based network event detection framework.	db/conf/imc/imc2010.html#ErikssonBBDSR10
3499671	Alessandra_Sala,Xiaohan_Zhao,Christo_Wilson,Haitao_Zheng,Ben_Y._Zhao	2011	Sharing graphs using differentially private graph models.	db/conf/imc/imc2011.html#SalaZWZZ11
3499677	Alberto_Dainotti,Alistair_King,kc_claffy,Ferdinando_Papale,Ã¨	2012	Analysis of a "/0" stealth scan from a botnet.	db/conf/imc/imc2012.html#DainottiKcPP12
3499680	Aaron_Gember,Aditya_Akella,Jeffrey_Pang,Alexander_Varshavsky,ceres	2012	Obtaining in-context measurements of cellular network performance.	db/conf/imc/imc2012.html#GemberAPVC12
3499684	Jelena_Isacenkova,Davide_Balzarotti	2011	Measurement and evaluation of a real world deployment of a challenge-response spam filter.	db/conf/imc/imc2011.html#IsacenkovaB11
3499686	Wonho_Kim,Ajay_Roopakalu,Katherine_Y._Li,Vivek_S._Pai	2011	Understanding and characterizing PlanetLab resource usage for federated network testbeds.	db/conf/imc/imc2011.html#KimRLP11
3499699	Michio_Honda,Yoshifumi_Nishida,Costin_Raiciu,Adam_Greenhalgh,Mark_Handley,Hideyuki_Tokuda	2011	Is it still possible to extend TCP?	db/conf/imc/imc2011.html#HondaNRGHT11
3499701	Eduard_Glatz,Xenofontas_A._Dimitropoulos	2012	Classifying internet one-way traffic.	db/conf/imc/imc2012.html#GlatzD12
3499705	Vyas_Sekar,Michael_K._Reiter,Hui_Zhang_0001	2010	Revisiting the case for a minimalist approach for network flow monitoring.	db/conf/imc/imc2010.html#SekarRZ10
3499707	Ralph_Holz,Lothar_Braun,Nils_Kammenhuber,Georg_Carle	2011	The SSL landscape: a thorough analysis of the x.509 PKI using active and passive measurements.	db/conf/imc/imc2011.html#HolzBKC11
3499709	Bruno_F._Ribeiro,Donald_F._Towsley	2010	Estimating and sampling graphs with multidimensional random walks.	db/conf/imc/imc2010.html#RibeiroT10
3499710	Ilona_Murynets,Roger_Piqueras_Jover	2012	ion: SMS spam data analysis.	db/conf/imc/imc2012.html#MurynetsJ12
3499719	Ang_Li,Xiaowei_Yang,Srikanth_Kandula,Ming_Zhang	2010	CloudCmp: comparing public cloud providers.	db/conf/imc/imc2010.html#LiYKZ10
3499720	Xian_Chen,Ruofan_Jin,Kyoungwon_Suh,Bing_Wang,Wei_Wei_0001	2012	Network performance of smart mobile handhelds in a university campus WiFi network.	db/conf/imc/imc2012.html#ChenJSWW12
3499734	Nandita_Dukkipati,Matt_Mathis,Yuchung_Cheng,Monia_Ghobadi	2011	Proportional rate reduction for TCP.	db/conf/imc/imc2011.html#DukkipatiMCG11
3499740	Xue_Cai,John_S._Heidemann,Balachander_Krishnamurthy,Walter_Willinger	2010	Towards an AS-to-organization map.	db/conf/imc/imc2010.html#CaiHKW10
3499742	Sayandeep_Sen,Jongwon_Yoon,Joshua_Hare,Justin_Ormont,Suman_Banerjee	2011	Can they hear me now?: a case for a client-assisted approach to monitoring wide-area wireless networks.	db/conf/imc/imc2011.html#SenYHOB11
3499746	Lothar_Braun,Alexander_Didebulidze,Nils_Kammenhuber,Georg_Carle	2010	Comparing and improving current packet capturing solutions based on commodity hardware.	db/conf/imc/imc2010.html#BraunDKC10
3499749	S._Shunmuga_Krishnan,Ramesh_K._Sitaraman	2012	Video stream quality impacts viewer behavior: inferring causality using quasi-experimental designs.	db/conf/imc/imc2012.html#KrishnanS12
3499754	Rade_Stanojevic,Nikolaos_Laoutaris,Pablo_Rodriguez	2010	On economic heavy hitters: shapley value analysis of 95th-percentile pricing.	db/conf/imc/imc2010.html#StanojevicLR10
3499760	Tongqing_Qiu,Junlan_Feng,Zihui_Ge,Jia_Wang,Jun_(Jim)_Xu,Jennifer_Yates	2010	Listen to me if you can: tracking user experience of mobile network on social media.	db/conf/imc/imc2010.html#QiuFGWXY10
3499761	Matthew_J._Luckie	2010	Scamper: a scalable and extensible packet prober for active measurement of the internet.	db/conf/imc/imc2010.html#Luckie10
3499769	Bernhard_Ager,hlbauer,Georgios_Smaragdakis,Steve_Uhlig	2010	Comparing DNS resolvers in the wild.	db/conf/imc/imc2010.html#AgerMSU10
3499772	Dominik_Schatzmann,hlbauer,Thrasyvoulos_Spyropoulos,Xenofontas_A._Dimitropoulos	2010	Digging into HTTPS: flow-based classification of webmail traffic.	db/conf/imc/imc2010.html#SchatzmannMSD10
3499776	Atif_Nazir,Alex_Waagen,Vikram_Vijayaraghavan,Chen-Nee_Chuah,Raissa_M._D'Souza,Balachander_Krishnamurthy	2012	Beyond friendship: modeling user activity graphs on social network-based gifting applications.	db/conf/imc/imc2012.html#NazirWVCDK12
3499787	Hyojoon_Kim,Theophilus_Benson,Aditya_Akella,Nick_Feamster	2011	The evolution of network configuration: a tale of two campuses.	db/conf/imc/imc2011.html#KimBAF11
3499791	nen,Aki_Nyrhinen,Lars_Eggert,Stephen_Strowes,Pasi_Sarolahti,Markku_Kojo	2010	An experimental study of home gateway characteristics.	db/conf/imc/imc2010.html#HatonenNESSK10
3499793	Vinod_Kone,Lei_Yang_0020,Xue_Yang,Ben_Y._Zhao,Haitao_Zheng	2010	On the feasibility of effective opportunistic spectrum access.	db/conf/imc/imc2010.html#KoneYYZZ10
3499795	Ignacio_Bermudez,Marco_Mellia,Ã²,Ram_Keralapura,Antonio_Nucci	2012	DNS to the rescue: discerning content and services in a tangled web.	db/conf/imc/imc2012.html#BermudezMMKN12
3499799	Myungjin_Lee,Nick_G._Duffield,Ramana_Rao_Kompella	2012	MAPLE: a scalable architecture for maintaining packet latency measurements.	db/conf/imc/imc2012.html#LeeDK12
3499800	Kevin_M._Carter_0001,Richard_Lippmann,Stephen_W._Boyer	2010	Temporally oblivious anomaly detection on large networks using functional peers.	db/conf/imc/imc2010.html#CarterLB10
3499802	Xingang_Shi,Yang_Xiang,Zhiliang_Wang,Xia_Yin,Jianping_Wu	2012	Detecting prefix hijackings in the internet with argus.	db/conf/imc/imc2012.html#ShiXWYW12
3499804	Emir_Halepovic,Jeffrey_Pang,Oliver_Spatscheck	2012	Can you GET me now?: estimating the time-to-first-byte of HTTP transactions with passive measurements.	db/conf/imc/imc2012.html#HalepovicPS12
3499805	Shravan_K._Rayanchu,Ashish_Patro,Suman_Banerjee	2011	Airshark: detecting non-WiFi RF devices using commodity WiFi hardware.	db/conf/imc/imc2011.html#RayanchuPB11
3499810	Enrico_Gregori,Alessandro_Improta,Luciano_Lenzini,Lorenzo_Rossi,Luca_Sani	2012	On the incompleteness of the AS-level graph: a novel methodology for BGP route collector placement.	db/conf/imc/imc2012.html#GregoriILRS12
3499811	Lin_Quan,John_S._Heidemann	2010	On the characteristics and reasons of long-lived internet flows.	db/conf/imc/imc2010.html#QuanH10
3499820	Amir_H._Rasti,Nazanin_Magharei,Reza_Rejaie,Walter_Willinger	2010	Eyeball ASes: from geography to connectivity.	db/conf/imc/imc2010.html#RastiMRW10
3499824	Robert_Beverly,Arthur_W._Berger,Geoffrey_G._Xie	2010	Primitives for active internet topology mapping: toward high-frequency characterization.	db/conf/imc/imc2010.html#BeverlyBX10
3499827	Kurt_Thomas,Chris_Grier,Dawn_Song,Vern_Paxson	2011	Suspended accounts in retrospect: an analysis of twitter spam.	db/conf/imc/imc2011.html#ThomasGSP11
3499839	Alberto_Dainotti,Claudio_Squarcella,Emile_Aben,Kimberly_C._Claffy,Marco_Chiesa,Michele_Russo,Ã¨	2011	Analysis of country-wide internet outages caused by censorship.	db/conf/imc/imc2011.html#DainottiSACCRP11
3499843	Vijay_Gopalakrishnan,Rittwik_Jana,K._K._Ramakrishnan,Deborah_F._Swayne,Vinay_A._Vaishampayan	2011	Understanding couch potatoes: measurement and modeling of interactive usage of IPTV at large scale.	db/conf/imc/imc2011.html#GopalakrishnanJRSV11
3499846	Renjie_Zhou,Samamon_Khemmarat,Lixin_Gao	2010	The impact of YouTube recommendation system on video views.	db/conf/imc/imc2010.html#ZhouKG10
3499849	Sebastian_Zander,Lachlan_L._H._Andrew,Grenville_J._Armitage,Geoff_Huston,George_Michaelson	2012	Mitigating sampling error when measuring internet client IPv6 capabilities.	db/conf/imc/imc2012.html#ZanderAAHM12
3499850	Eric_Wustrow,Manish_Karir,Michael_Bailey,Farnam_Jahanian,Geoff_Huston	2010	Internet background radiation revisited.	db/conf/imc/imc2010.html#WustrowKBJH10
3499852	Stevens_Le_Blond,Chao_Zhang,Arnaud_Legout,Keith_W._Ross,Walid_Dabbous	2011	I know where you are and what you are sharing: exploiting P2P communications to invade users' privacy.	db/conf/imc/imc2011.html#Le-BlondZLRD11
3499855	Shane_Alcock,Richard_Nelson	2012	Measuring the impact of the copyright amendment act on New Zealand residential DSL users.	db/conf/imc/imc2012.html#AlcockN12
3499859	Francesco_Fusco,Luca_Deri	2010	High speed network traffic analysis with commodity multi-core systems.	db/conf/imc/imc2010.html#FuscoD10
3499860	Ioannis_Papapanagiotou,Erich_M._Nahum,Vasileios_Pappas	2012	Configuring DHCP leases in the smartphone era.	db/conf/imc/imc2012.html#PapapanagiotouNP12
3499870	Brett_Stone-Gross,Ryan_Stevens,Apostolis_Zarras,Richard_A._Kemmerer,Christopher_Kruegel,Giovanni_Vigna	2011	Understanding fraudulent activities in online ad exchanges.	db/conf/imc/imc2011.html#Stone-GrossSZKKV11
3499878	Mohammad_Al-Fares,Khaled_Elmeleegy,Benjamin_Reed,Igor_Gashinsky	2011	Overclocking the Yahoo!: CDN for faster web page loads.	db/conf/imc/imc2011.html#Al-FaresERG11
3499882	Zhi_Yang,Christo_Wilson,Xiao_Wang,Tingting_Gao,Ben_Y._Zhao,Yafei_Dai	2011	Uncovering social network sybils in the wild.	db/conf/imc/imc2011.html#YangWWGZD11
3499885	Alessandro_Finamore,Marco_Mellia,Ã²,Ruben_Torres,Sanjay_G._Rao	2011	YouTube everywhere: impact of device and infrastructure synergies on user experience.	db/conf/imc/imc2011.html#FinamoreMMTR11
3499891	Junxian_Huang,Feng_Qian,Zhuoqing_Morley_Mao,Subhabrata_Sen,Oliver_Spatscheck	2012	Screen-off traffic characterization and optimization in 3G/4G networks.	db/conf/imc/imc2012.html#HuangQMSS12
3499898	Cristian_Lumezanu,Katherine_Guo,Neil_Spring,Bobby_Bhattacharjee	2010	The effect of packet loss on redundancy elimination in cellular wireless networks.	db/conf/imc/imc2010.html#LumezanuGSB10
3499902	Aaron_Schulman,Neil_Spring	2011	Pingin' in the rain.	db/conf/imc/imc2011.html#SchulmanS11
3499908	rindol,Benoit_Donnet,Olivier_Bonaventure,Jean-Jacques_Pansiot	2010	On the impact of layer-2 on node degree distribution.	db/conf/imc/imc2010.html#MerindolDBP10
3499916	Matthew_J._Luckie,Ben_Stasiewicz	2010	Measuring path MTU discovery behaviour.	db/conf/imc/imc2010.html#LuckieS10
3499917	Yuheng_Li,Yiping_Zhang,Ruixi_Yuan	2011	Measurement and analysis of a large scale commercial mobile internet TV system.	db/conf/imc/imc2011.html#LiZY11
3499923	Joel_Sommers,Paul_Barford	2012	Cell vs. WiFi: on the performance of metro area mobile connections.	db/conf/imc/imc2012.html#SommersB12
3499925	Tiago_Rodrigues,cio_Benevenuto,Meeyoung_Cha,P._Krishna_Gummadi,lio_A._F._Almeida	2011	On word-of-mouth based discovery of the web.	db/conf/imc/imc2011.html#RodriguesBCGA11
3499929	Miltiadis_Allamanis,Salvatore_Scellato,Cecilia_Mascolo	2012	Evolution of a location-based online social network: analysis and models.	db/conf/imc/imc2012.html#AllamanisSM12
3499935	Andrew_J._Kalafut,Minaxi_Gupta,Christopher_A._Cole,Lei_Chen,Nathan_E._Myers	2010	An empirical study of orphan DNS servers in the internet.	db/conf/imc/imc2010.html#KalafutGCCM10
3499942	Yabing_Liu,P._Krishna_Gummadi,Balachander_Krishnamurthy,Alan_Mislove	2011	Analyzing facebook privacy settings: user expectations vs. reality.	db/conf/imc/imc2011.html#LiuGKM11
3499947	Mohan_Dhawan,Justin_Samuel,Renata_Teixeira,Christian_Kreibich,Mark_Allman,Nicholas_Weaver,Vern_Paxson	2012	Fathom: a browser-based network measurement platform.	db/conf/imc/imc2012.html#DhawanSTKAWP12
3499949	Te-Yuan_Huang,Nikhil_Handigol,Brandon_Heller,Nick_McKeown,Ramesh_Johari	2012	Confused, timid, and unstable: picking a video streaming rate is hard.	db/conf/imc/imc2012.html#HuangHHMJ12
3499952	Jeffrey_Erman,Alexandre_Gerber,K._K._Ramakrishnan,Subhabrata_Sen,Oliver_Spatscheck	2011	Over the top video: the gorilla in cellular networks.	db/conf/imc/imc2011.html#ErmanGRSS11
3499955	Gabriel_Magno,Giovanni_Comarela,ez-Trumper,Meeyoung_Cha,lio_A._F._Almeida	2012	New kid on the block: exploring the google+ social graph.	db/conf/imc/imc2012.html#MagnoCSCA12
3499963	Zi_Hu,John_S._Heidemann,Yuri_Pradkin	2012	Towards geolocation of millions of IP addresses.	db/conf/imc/imc2012.html#HuHP12
3499964	Qiang_Xu,Jeffrey_Erman,Alexandre_Gerber,Zhuoqing_Morley_Mao,Jeffrey_Pang,Shobha_Venkataraman	2011	Identifying diverse usage behaviors of smartphone apps.	db/conf/imc/imc2011.html#XuEGMPV11
3499965	Abedelaziz_Mohaisen,Aaram_Yun,Yongdae_Kim	2010	Measuring the mixing time of social graphs.	db/conf/imc/imc2010.html#MohaisenYK10
3499969	Yingying_Chen_0002,Sourabh_Jain,Vijay_Kumar_Adhikari,Zhi-Li_Zhang	2011	Characterizing roles of front-end servers in end-to-end performance of dynamic content distribution.	db/conf/imc/imc2011.html#ChenJAZ11
3499978	Shuang_Hao,Nick_Feamster,Ramakant_Pandrangi	2011	Monitoring the initial DNS behavior of malicious domains.	db/conf/imc/imc2011.html#HaoFP11
3499980	Zhenyu_Li,Jiali_Lin,nou,Gaogang_Xie,afar,Yun_Jin,Gang_Peng	2012	Watching videos from everywhere: a study of the PPTV mobile VoD system.	db/conf/imc/imc2012.html#LiLAXKJP12
3499982	Francesco_Fusco,Michail_Vlachos,Xenofontas_A._Dimitropoulos	2012	RasterZip: compressing network monitoring data with support for partial decompression.	db/conf/imc/imc2012.html#FuscoVD12
3500001	Xiaohan_Zhao,Alessandra_Sala,Christo_Wilson,Xiao_Wang,Sabrina_Gaito,Haitao_Zheng,Ben_Y._Zhao	2012	Multi-scale dynamics in a massive online social network.	db/conf/imc/imc2012.html#ZhaoSWWGZZ12
3500004	Alfredo_Cardigliano,Luca_Deri,Joseph_Gasparakis,Francesco_Fusco	2011	vPF_RING: towards wire-speed network monitoring using virtual machines.	db/conf/imc/imc2011.html#CardiglianoDGF11
3500010	Elias_Raftopoulos,Xenofontas_A._Dimitropoulos	2011	Detecting, validating and characterizing computer infections in the wild.	db/conf/imc/imc2011.html#RaftopoulosD11
3500012	Sandeep_Yadav,Ashwath_Kumar_Krishna_Reddy,A._L._Narasimha_Reddy,Supranamaya_Ranjan	2010	Detecting algorithmically generated malicious domain names.	db/conf/imc/imc2010.html#YadavRRR10
3500016	Bernhard_Ager,hlbauer,Georgios_Smaragdakis,Steve_Uhlig	2011	Web content cartography.	db/conf/imc/imc2011.html#AgerMSU11
3500022	Andreas_Pitsillidis,Chris_Kanich,Geoffrey_M._Voelker,Kirill_Levchenko,Stefan_Savage	2012	Taster's choice: a comparative analysis of spam feeds.	db/conf/imc/imc2012.html#PitsillidisKVLS12
3500027	Alexandre_Gerber,Jeffrey_Pang,Oliver_Spatscheck,Shobha_Venkataraman	2010	Speed testing without speed tests: estimating achievable download speed from passive measurements.	db/conf/imc/imc2010.html#GerberPSV10
3500029	Jing_Jiang,Christo_Wilson,Xiao_Wang,Peng_Huang,Wenpeng_Sha,Yafei_Dai,Ben_Y._Zhao	2010	Understanding latent interactions in online social networks.	db/conf/imc/imc2010.html#JiangWWHSDZ10
3500036	Oliver_Hohlfeld,Thomas_Graf,Florin_Ciucu	2012	Longtime behavior of harvesting spam bots.	db/conf/imc/imc2012.html#HohlfeldGC12
3500043	Yuan_Ding,Yuan_Du,Yingkai_Hu,Zhengye_Liu,Luqin_Wang,Keith_W._Ross,Anindya_Ghose	2011	Broadcast yourself: understanding YouTube uploaders.	db/conf/imc/imc2011.html#DingDHLWRG11
3500044	Idilio_Drago,Marco_Mellia,Ã²,Anna_Sperotto,Ramin_Sadre,Aiko_Pras	2012	Inside dropbox: understanding personal cloud storage services.	db/conf/imc/imc2012.html#DragoMMSSP12
3500048	s-Cuxart,Pere_Barlet-Ros,Nick_G._Duffield,Ramana_Rao_Kompella	2011	Sketching the delay: tracking temporally uncorrelated flow-level latencies.	db/conf/imc/imc2011.html#Sanjuas-CuxartBDK11
3500050	Theophilus_Benson,Aditya_Akella,David_A._Maltz	2010	Network traffic characteristics of data centers in the wild.	db/conf/imc/imc2010.html#BensonAM10
3500057	Marti_Motoyama,Damon_McCoy,Kirill_Levchenko,Stefan_Savage,Geoffrey_M._Voelker	2011	An analysis of underground forums.	db/conf/imc/imc2011.html#MotoyamaMLSV11
3500064	Saikat_Guha,Bin_Cheng,Paul_Francis	2010	Challenges in measuring online advertising systems.	db/conf/imc/imc2010.html#GuhaCF10
3500071	Edmond_W._W._Chan,Xiapu_Luo,Weichao_Li,Waiting_W._T._Fok,Rocky_K._C._Chang	2010	Measurement of loss pairs in network paths.	db/conf/imc/imc2010.html#ChanLLFC10
3500073	Feng_Qian,Zhaoguang_Wang,Alexandre_Gerber,Zhuoqing_Morley_Mao,Subhabrata_Sen,Oliver_Spatscheck	2010	Characterizing radio resource allocation for 3G networks.	db/conf/imc/imc2010.html#QianWGMSS10
3500076	Abhinav_Pathak,Ming_Zhang,Y._Charlie_Hu,Ratul_Mahajan,David_A._Maltz	2011	Latency inflation with MPLS-based traffic engineering.	db/conf/imc/imc2011.html#PathakZHMM11
3500077	Yang_Chen,Jens_O._Berg,Mostafa_H._Ammar,Ellen_W._Zegura	2011	Evaluation of data communication opportunities from oil field locations at remote areas.	db/conf/imc/imc2011.html#ChenBAZ11
3500080	Michael_Butkiewicz,Harsha_V._Madhyastha,Vyas_Sekar	2011	Understanding website complexity: measurements, metrics, and implications.	db/conf/imc/imc2011.html#ButkiewiczMS11
3500088	Daniel_A._Freedman,Tudor_Marian,Jennifer_H._Lee,Ken_Birman,Hakim_Weatherspoon,Chris_Xu	2010	Exact temporal characterization of 10 Gbps optical wide-area network.	db/conf/imc/imc2010.html#FreedmanMLBWX10
3500090	Henrik_Abrahamsson,Mattias_Nordmark	2012	Program popularity and viewer behaviour in a large TV-on-demand system.	db/conf/imc/imc2012.html#AbrahamssonN12
3500094	Amogh_Dhamdhere,Lee_Breslau,Nick_G._Duffield,Cheng_Ee,Alexandre_Gerber,Carsten_Lund,Subhabrata_Sen	2010	Flowroute: inferring forwarding table updates using passive flow-level measurements.	db/conf/imc/imc2010.html#DhamdhereBDEGLS10
3500096	Christian_Kreibich,Nicholas_Weaver,Boris_Nechaev,Vern_Paxson	2010	Netalyzr: illuminating the edge network.	db/conf/imc/imc2010.html#KreibichWNP10
3500099	Xun_Fan,John_S._Heidemann	2010	Selecting representative IP addresses for internet topology studies.	db/conf/imc/imc2010.html#FanH10
3500101	Tongqing_Qiu,Zihui_Ge,Dan_Pei,Jia_Wang,Jun_(Jim)_Xu	2010	What happened in my network: mining network events from router syslogs.	db/conf/imc/imc2010.html#QiuGPWX10
3500104	John_S._Otto,nchez,John_P._Rula,n_E._Bustamante	2012	Content delivery and the natural evolution of DNS: remote dns trends, performance issues and alternative solutions.	db/conf/imc/imc2012.html#OttoSRB12
3500108	rsun,Mark_Crovella	2012	On traffic matrix completion in the internet.	db/conf/imc/imc2012.html#GursunC12
3500110	Katrina_LaCurts,Hari_Balakrishnan	2010	Measurement and analysis of real-world 802.11 mesh networks.	db/conf/imc/imc2010.html#LaCurtsB10
3500114	Neil_Zhenqiang_Gong,Wenchang_Xu,Ling_Huang,Prateek_Mittal,Emil_Stefanov,Vyas_Sekar,Dawn_Song	2012	Evolution of social-attribute networks: measurements, modeling, and implications using google+.	db/conf/imc/imc2012.html#GongXHMSSS12
3500115	Igor_Canadi,Paul_Barford,Joel_Sommers	2012	Revisiting broadband performance.	db/conf/imc/imc2012.html#CanadiBS12
3500118	Cristian_Lumezanu,Nick_Feamster	2012	Observing common spam in Twitter and email.	db/conf/imc/imc2012.html#LumezanuF12
3500121	Sunghwan_Ihm,Vivek_S._Pai	2011	Towards understanding modern web traffic.	db/conf/imc/imc2011.html#IhmP11
3846936	Maria_Gorlatova,T._Sharma,D._Shrestha,E._Xu,Jiasi_Chen,A._Skolnik,Dongzhen_Piao,Peter_R._Kinget,Ioannis_Kymissis,Dan_Rubenstein,Gil_Zussman	2010	Prototyping Energy Harvesting Active Networked Tags (EnHANTs) with MICA2 Motes.	db/conf/secon/secon2010.html#GorlatovaSSXCSPKKRZ10
3846950	Bo_Xing,Sharad_Mehrotra,Nalini_Venkatasubramanian	2010	Disruption-Tolerant Spatial Dissemination.	db/conf/secon/secon2010.html#XingMV10
3846955	Ze_Li,Haiying_Shen	2012	MDR: A P2P-based market-guided distributed routing mechanism for high-throughput hybrid wireless networks.	db/conf/secon/secon2012.html#LiS12
3846960	Serdar_Vural,Lap_Kong_Law,Srikanth_V._Krishnamurthy,Michalis_Faloutsos	2010	On the Uplink Capacity of Hybrid Cellular Ad Hoc Networks.	db/conf/secon/secon2010.html#VuralLKF10
3846964	Md._Yusuf_Sarwar_Uddin,Ahmed_Khurshid,Hee_Dong_Jung,Carl_A._Gunter,Matthew_Caesar,Tarek_F._Abdelzaher	2011	Making DTNs robust against spoofing attacks with localized countermeasures.	db/conf/secon/secon2011.html#UddinKJGCA11
3846973	Rui_Zhang_0007,Yunzhong_Liu,Yanchao_Zhang,Jinyuan_Sun	2011	Fast identification of the missing tags in a large RFID system.	db/conf/secon/secon2011.html#ZhangLZS11
3846976	Hanan_Shpungin,Zongpeng_Li	2010	Throughput and Energy Efficiency in Wireless Ad Hoc Networks with Gaussian Channels.	db/conf/secon/secon2010.html#ShpunginL10
3846977	Ting_Ning,Zhipeng_Yang,Xiaojuan_Xie,Hongyi_Wu	2011	Incentive-aware data dissemination in delay-tolerant mobile networks.	db/conf/secon/secon2011.html#NingYXW11
3846979	Edith_C._H._Ngai,He_Huang,Jiangchuan_Liu,Mani_B._Srivastava	2011	OppSense: Information sharing for mobile phones in sensing field with data repositories.	db/conf/secon/secon2011.html#NgaiHLS11
3846980	Donato_Battaglino,Lorenzo_Bracciale,Andrea_Detti,Francesca_Lo_Piccolo,Andrea_Bragagnini,Maura_Santina_Turolla,Nicola_Blefari-Melazzi	2011	Campus++: A publish-subscribe architecture for intermittently connected 802.15.4 networks.	db/conf/secon/secon2011.html#BattaglinoBDPBTB11
3846985	Euhanna_Ghadimi,Olaf_Landsiedel,Pablo_Soldati,Mikael_Johansson	2012	A metric for opportunistic routing in duty cycled wireless sensor networks.	db/conf/secon/secon2012.html#GhadimiLSJ12
3846987	Hui_Liu,Jialin_He,Pengfei_Cui,Joseph_David_Camp,Dinesh_Rajan	2012	ASTRA: Application of sequential training to rate adaptation.	db/conf/secon/secon2012.html#LiuHCCR12
3846988	Hyun_Lee,Jae-Yong_Yoo,JongWon_Kim_0001	2012	MOVi+: Improving the scalability of mobile opportunistic video-on-demand.	db/conf/secon/secon2012.html#LeeYK12
3847002	Liangyin_Chen,Yu_Gu_0001,Shuo_Guo,Tian_He,Yuanchao_Shu,Fan_Zhang,Jiming_Chen	2012	Group-based discovery in low-duty-cycle mobile sensor networks.	db/conf/secon/secon2012.html#ChenGGHSZC12
3847005	Chi_Zhang,Jun_Luo,Liu_Xiang,Feng_Li,Juncong_Lin,Ying_He	2012	Harmonic quorum systems: Data management in 2D/3D wireless sensor networks with holes.	db/conf/secon/secon2012.html#ZhangLXLLH12
3847012	Rohan_Gandhi,Chih-Chun_Wang,Y._Charlie_Hu	2012	Fast rendezvous for multiple clients for cognitive radios using coordinated channel hopping.	db/conf/secon/secon2012.html#GandhiWH12
3847015	Youn_Seo,Keun_Woo_Lim,Young-Bae_Ko,Yooseung_Song,Sangjoon_Park	2012	Adaptive wireless mesh networks architecture based on IEEE 802.11s for public surveillance.	db/conf/secon/secon2012.html#SeoLKSP12
3847018	Chi_Harold_Liu,Pan_Hui,Joel_W._Branch,Chatschik_Bisdikian,Bo_Yang	2011	Efficient network management for context-aware participatory sensing.	db/conf/secon/secon2011.html#LiuHBBY11
3847019	Lei_Yang_0020,Vinod_Kone,Xue_Yang,York_Liu,Ben_Y._Zhao,Haitao_Zheng	2010	Coexistence-Aware Scheduling for Wireless System-on-a-Chip Devices.	db/conf/secon/secon2010.html#YangKYLZZ10
3847027	Fangfei_Chen,Matthew_P._Johnson,Amotz_Bar-Noy,Thomas_F._La_Porta	2012	Convergecast with aggregatable data classes.	db/conf/secon/secon2012.html#ChenJBP12
3847029	Lei_Ding,Tommaso_Melodia,Stella_N._Batalama,John_D._Matyjas	2010	Distributed Routing, Relay Selection, and Spectrum Allocation in Cognitive and Cooperative Ad Hoc Networks.	db/conf/secon/secon2010.html#DingMBM10
3847032	Dejun_Yang,Satyajayant_Misra,Xi_Fang,Guoliang_Xue,Junshan_Zhang	2010	Two-Tiered Constrained Relay Node Placement in Wireless Sensor Networks: Efficient Approximations.	db/conf/secon/secon2010.html#YangMFXZ10
3847033	Shehzad_Amir,Young-June_Choi	2012	Interference coordination scheme between WiFi and Zigbee networks.	db/conf/secon/secon2012.html#AmirC12
3847045	Wei_Wang_0021,Kang_G._Shin,Zhaoyang_Zhang_0001,Wenbo_Wang_0007,Tao_Peng_0001	2012	Generalized geometry-based optimal power control in wireless networks.	db/conf/secon/secon2012.html#WangSZWP12
3847049	Eunjoon_Cho,Kevin_Wong,Omprakash_Gnawali,Martin_Wicke,Leonidas_J._Guibas	2011	Inferring mobile trajectories using a network of binary proximity sensors.	db/conf/secon/secon2011.html#ChoWGWG11
3847055	Cuong_Pham,Duc_A._Tran	2010	CRES: A Content-Based Routing Substrate for Large-Scale Data-Centric Sensor Networks.	db/conf/secon/secon2010.html#PhamT10
3847058	Tom_La_Porta,Chiara_Petrioli,Dora_Spenza	2011	Sensor-mission assignment in wireless sensor networks with energy harvesting.	db/conf/secon/secon2011.html#PortaPS11
3847079	Baozhi_Chen,Dario_Pompili	2010	A Testbed for Performance Evaluation of Underwater Vehicle Team Formation and Steering Algorithms.	db/conf/secon/secon2010.html#ChenP10
3847090	Vassileios_Tsetsos,Vassilis_Papataxiarhis,F._Kontos,Stathes_Hadjiefthymiades,P._Patelis,E._Fytros,L._Liotti,A._Roat	2010	Smart-Sensor Infrastructure in the IPAC Architecture.	db/conf/secon/secon2010.html#TsetsosPKHPFLR10
3847092	Diep_N._Nguyen,Marwan_Krunz	2011	A cooperative clustering protocol for energy constrained networks.	db/conf/secon/secon2011.html#NguyenK11
3847093	Xiaoyan_Li	2010	Designing Localization Algorithms Robust to Signal Strength Attacks.	db/conf/secon/secon2010.html#Li10
3847094	Yair_Amir,Raluca_Musaloiu-Elefteri,Nilo_Rivera	2010	A Robust Push-To-Talk Service for Wireless Mesh Networks.	db/conf/secon/secon2010.html#AmirMR10
3847105	Colin_O'Reilly,Alexander_Gluhak,Muhammad_Ali_Imran,Sutharshan_Rajasegarar	2012	Online anomaly rate parameter tracking for anomaly detection in wireless sensor networks.	db/conf/secon/secon2012.html#OReillyGIR12
3847107	Josep_Miquel_Jornet,Ian_F._Akyildiz	2011	Information capacity of pulse-based Wireless Nanosensor Networks.	db/conf/secon/secon2011.html#JornetA11
3847112	Paola_Bermolen,ois_Baccelli	2010	Multiple Access Mechanisms with Performance Guarantees for Ad-Hoc Networks.	db/conf/secon/secon2010.html#BermolenB10
3847114	Zhi_Sun,Ian_F._Akyildiz	2010	Connectivity in Wireless Underground Sensor Networks.	db/conf/secon/secon2010.html#SunA10
3847117	Travis_L._Massey,Ankur_Mehta,Thomas_Watteyne,Kristofer_S._J._Pister	2010	Packet Compression for Time-Synchronized Wireless Networks.	db/conf/secon/secon2010.html#MasseyMWP10
3847118	Xue_Yang,Hsin-Yuo_Liu,Xingang_Guo	2010	Bluetooth Coexistence with 4G Broadband Wireless Networks.	db/conf/secon/secon2010.html#YangLG10
3847125	JeongGil_Ko,Andreas_Terzis	2010	Power Control for Mobile Sensor Networks: An Experimental Approach.	db/conf/secon/secon2010.html#KoT10
3847127	Brendan_Mumey,Xia_Zhao,Jian_Tang,Richard_S._Wolff	2010	Transmission Scheduling for Routing Paths in Cognitive Radio Mesh Networks.	db/conf/secon/secon2010.html#MumeyZTW10
3847133	Vijay_Raman,Fan_Wu,Brian_Proulx,Nitin_H._Vaidya	2010	Overcoming MAC Overhead Using Packet-Size Dependent Channel Widths.	db/conf/secon/secon2010.html#RamanWPV10
3847134	Andreas_Achtzehn,rvi,nen	2012	Error distribution in maximum likelihood estimation of radio propagation model parameters.	db/conf/secon/secon2012.html#AchtzehnRM12
3847137	Zhanwei_Sun,Chi_Harold_Liu,Chatschik_Bisdikian,Joel_W._Branch,Bo_Yang	2012	QoI-aware energy management in Internet-of-Things sensory environments.	db/conf/secon/secon2012.html#SunLBBY12
3847138	Youngki_Lee,Younghyun_Ju,Chulhong_Min,Jihyun_Yu,Junehwa_Song	2012	MobiCon: Mobile context monitoring platform: Incorporating context-awareness to smartphone-centric personal sensor networks.	db/conf/secon/secon2012.html#LeeJMYS12
3847147	Xin_Che,Xiaohui_Liu,Xi_Ju,Hongwei_Zhang	2010	Adaptive Instantiation of the Protocol Interference Model in Mission-Critical Wireless Networks.	db/conf/secon/secon2010.html#CheLJZ10
3847150	Yeonsik_Jeong,Sun-Hyun_Kim,Seung-Jae_Han	2012	Link configuration and message forwarding for intermittently connected mobile networks.	db/conf/secon/secon2012.html#JeongKH12
3847155	Arjun_P._Athreya,Patrick_Tague	2011	Towards secure multi-path routing for wireless mobile ad-hoc networks: A cross-layer strategy.	db/conf/secon/secon2011.html#AthreyaT11
3847157	Vijay_Raman,Nitin_H._Vaidya	2011	WiSP: A protocol for overcoming MAC overheads using packet size dependent channel widths.	db/conf/secon/secon2011.html#RamanV11
3847167	Liguang_Xie,Yi_Shi,Y._Thomas_Hou,Wenjing_Lou,Hanif_D._Sherali,Scott_F._Midkiff	2012	On renewable sensor networks with wireless energy transfer: The multi-node case.	db/conf/secon/secon2012.html#XieSHLSM12
3847168	Luca_Benini,Davide_Brunelli,Chiara_Petrioli,Simone_Silvestri	2010	GENESI: Green sEnsor NEtworks for Structural monItoring.	db/conf/secon/secon2010.html#BeniniBPS10
3847170	Carlos_R._Perez-Toro,Rajesh_Krishna_Panta,Saurabh_Bagchi	2010	RDAS: Reputation-Based Resilient Data Aggregation in Sensor Network.	db/conf/secon/secon2010.html#Perez-ToroPB10
3847172	Minsu_Huang,Siyuan_Chen,Yu_Wang_0003	2010	Minimum Cost Localization Problem in Wireless Sensor Networks.	db/conf/secon/secon2010.html#HuangCW10
3847176	Baozhi_Chen,Dario_Pompili	2012	Uncertainty-aware localization solution for under-ice autonomous underwater vehicles.	db/conf/secon/secon2012.html#ChenP12
3847177	Yang_Zhao,Neal_Patwari	2011	Noise reduction for variance-based device-free localization and tracking.	db/conf/secon/secon2011.html#ZhaoP11a
3847178	Beat_Weiss,Hong_Linh_Truong,Wolfgang_Schott,Andrea_Munari,Clemens_Lombriser,Urs_Hunkeler,Pierre_R._Chevillat	2011	A power-efficient wireless sensor network for continuously monitoring seismic vibrations.	db/conf/secon/secon2011.html#WeissTSMLHC11
3847182	Hanan_Shpungin	2011	Energy efficient online routing in wireless ad hoc networks.	db/conf/secon/secon2011.html#Shpungin11
3847192	b,Claude_Chaudet	2012	Using VIRMANEL and SILUMOD to study protocol for mobile multihop networks.	db/conf/secon/secon2012.html#BenchaibC12
3847200	Majid_Nabi,Marc_Geilen,Twan_Basten	2012	Demonstrating on-demand listening and data forwarding in wireless body area networks.	db/conf/secon/secon2012.html#NabiGB12
3847203	Chunsheng_Zhu,Laurence_Tianruo_Yang,Lei_Shu,Lei_Wang_0005,Takahiro_Hara	2011	Sleep scheduling towards geographic routing in duty-cycled sensor networks with a mobile sink.	db/conf/secon/secon2011.html#ZhuYSWH11
3847204	Parisa_Haghani,Yih-Chun_Hu	2012	Power control for fair dynamic channel reservation in VANETs.	db/conf/secon/secon2012.html#HaghaniH12
3847208	Alireza_Shahan_Behbahani,Ahmed_M._Eltawil,Hamid_Jafarkhani	2011	Linear decentralized estimation of correlated data for wireless sensor networks.	db/conf/secon/secon2011.html#BehbahaniEJ11
3847212	Navin_Sharma,Jeremy_Gummeson,David_E._Irwin,Prashant_J._Shenoy	2010	Cloudy Computing: Leveraging Weather Forecasts in Energy Harvesting Sensor Systems.	db/conf/secon/secon2010.html#SharmaGIS10
3847214	Rijurekha_Sen,Pankaj_Siriah,Bhaskaran_Raman	2011	RoadSoundSense: Acoustic sensing based road congestion monitoring in developing regions.	db/conf/secon/secon2011.html#SenSR11
3847219	Liu_Xiang,Jun_Luo,Athanasios_V._Vasilakos	2011	Compressed data aggregation for energy efficient wireless sensor networks.	db/conf/secon/secon2011.html#XiangLV11
3847220	Xi_Fang,Dejun_Yang,Pritam_Gundecha,Guoliang_Xue	2010	Multi-Constrained Anypath Routing in Wireless Mesh Networks.	db/conf/secon/secon2010.html#FangYGX10
3847221	Jun_Liu_0006,Zhaohui_Wang,Michael_Zuba,Zheng_Peng,Jun-Hong_Cui,Shengli_Zhou	2012	JSL: Joint time synchronization and localization design with stratification compensation in mobile underwater sensor networks.	db/conf/secon/secon2012.html#LiuWZPCZ12
3847226	Junchao_Ma,Wei_Lou	2011	Interference-aware spatio-temporal link scheduling for long delay underwater sensor networks.	db/conf/secon/secon2011.html#MaL11
3847227	Jeremy_Gribben,Azzedine_Boukerche,Richard_Werner_Nelem_Pazzi	2010	Scheduling for Scalable Energy-Efficient Localization in Mobile Ad Hoc Networks.	db/conf/secon/secon2010.html#GribbenBP10
3847239	Yuyan_Xue,Mehmet_C._Vuran,Byrav_Ramamurthy	2010	Cost Efficiency of Anycast-Based Forwarding in Duty-Cycled WSNs with Lossy Channel.	db/conf/secon/secon2010.html#XueVR10
3847240	A._Rahim,Nadeem_Javaid,M._Aslam,U._Qasim,Z._A._Khan	2012	Adaptive-reliable medium access control protocol for wireless body area networks.	db/conf/secon/secon2012.html#RahimJAQK12
3847248	Asaad_Ahmed,Keiichi_Yasumoto,Yukiko_Yamauchi,Minoru_Ito	2011	Distance and time based node selection for probabilistic coverage in People-Centric Sensing.	db/conf/secon/secon2011.html#AhmedYYI11
3847250	Tiansi_Hu,Yunsi_Fei	2012	MURAO: A multi-level routing protocol for acoustic-optical hybrid underwater wireless sensor networks.	db/conf/secon/secon2012.html#HuF12
3847256	Silvija_Kokalj-Filipovic,Fabrice_Le_Fessant,Predrag_Spasojevic	2011	Trade-offs of source location protection in globally attacked sensor networks: A case analysis.	db/conf/secon/secon2011.html#Kokalj-FilipovicFS11
3847266	Hooman_Javaheri,Guevara_Noubir	2010	iPoint: A Platform-Independent Passive Information Kiosk for Cell Phones.	db/conf/secon/secon2010.html#JavaheriN10a
3847277	Tom_H._Luan,Lin_X._Cai,Jiming_Chen,Xuemin_Shen,Fan_Bai	2011	VTube: Towards the media rich city life with autonomous vehicular content distribution.	db/conf/secon/secon2011.html#LuanCCSB11
3847279	Erman_Ayday,Faramarz_Fekri	2012	BP-P2P: Belief propagation-based trust and reputation management for P2P networks.	db/conf/secon/secon2012.html#AydayF12
3847290	Fan_Wu,Vijay_Raman,Nitin_H._Vaidya	2010	Being Opportunistic or Being Concurrent -- On Designing Channel Assignment Algorithms in Multi-Radio, Multi-Channel Wireless Mesh Networks.	db/conf/secon/secon2010.html#WuRV10
3847291	Shigeng_Zhang,Jianxin_Wang,Xuan_Liu,Jiannong_Cao	2012	Range-free selective multilateration for anisotropic wireless sensor networks.	db/conf/secon/secon2012.html#ZhangWLC12
3847295	Weixiong_Rao,Kai_Zhao,Yan_Zhans,Pan_Hui,Sasu_Tarkoma	2012	Maximizing timely content advertising in DTNs.	db/conf/secon/secon2012.html#RaoZZHT12
3847296	Chul-Ho_Lee,Do_Young_Eun	2010	Exploiting Heterogeneity in Mobile Opportunistic Networks: An Analytic Approach.	db/conf/secon/secon2010.html#LeeE10
3847297	Liu_Xiang,Jun_Luo,Chenwei_Deng,Athanasios_V._Vasilakos,Weisi_Lin	2012	DECA: Recovering fields of physical quantities from incomplete sensory data.	db/conf/secon/secon2012.html#XiangLDVL12
3847299	Raju_Kumar,Sharanya_Eswaran,Tom_La_Porta	2011	End-to-end rate selection for opportunistic reception in multi-rate wireless networks.	db/conf/secon/secon2011.html#KumarEP11
3847303	Behzad_Shahrasbi,Nazanin_Rahnavard	2011	Rateless-coding-based cooperative cognitive radio networks: Design and analysis.	db/conf/secon/secon2011.html#ShahrasbiR11
3847312	Mohsen_Mollanoori,Majid_Ghaderi	2012	On the performance of successive interference cancellation in random access networks.	db/conf/secon/secon2012.html#MollanooriG12
3847315	Wei_Peng,Feng_Li,Xukai_Zou,Jie_Wu_0001	2012	Seed and Grow: An attack against anonymized social networks.	db/conf/secon/secon2012.html#PengLZW12
3847317	Farhana_Ashraf,Yih-Chun_Hu,Robin_Kravets	2011	Bankrupting the jammer.	db/conf/secon/secon2011.html#AshrafHK11
3847327	Jing_Yuan,Shaojie_Tang,Cheng_Wang,Debraj_De,Xiang-Yang_Li,Wen-Zhan_Song,Guihai_Chen	2011	A real-time rescue system: Towards practical implementation of robotic sensor network.	db/conf/secon/secon2011.html#YuanTWDLSC11
3847329	Lei_Chen_0018,Jeff_Frolik	2012	Active consensus over sensor networks via selective communication.	db/conf/secon/secon2012.html#ChenF12
3847334	Tan_Yan,Wensheng_Zhang_0001,Guiling_Wang	2012	DOVE: Data dissemination to a fixed number of receivers in VANET.	db/conf/secon/secon2012.html#Yan0W12
3847337	Karim_Habak,Khaled_A._Harras,Moustafa_Youssef	2012	OPERETTA: An optimal energy efficient bandwidth aggregation system.	db/conf/secon/secon2012.html#HabakHY12a
3847338	Harish_Chintakunta,Hamid_Krim	2010	Divide and Conquer: Localizing Coverage Holes in Sensor Networks.	db/conf/secon/secon2010.html#ChintakuntaK10
3847340	Ashwin_Ashok,Marco_Gruteser,Narayan_B._Mandayam,Taekyoung_Kwon,Wenjia_Yuan,Michael_Varga,Kristin_J._Dana	2011	Rate adaptation in visual MIMO.	db/conf/secon/secon2011.html#AshokGMKYVD11
3847351	Rahul_Balani,Mohamed_Nabil_Hajj_Chehade,Supriyo_Chakraborty,Mani_B._Srivastava	2011	Distributed coordination for fast iterative optimization in wireless sensor/actuator networks.	db/conf/secon/secon2011.html#BalaniCCS11
3847354	Yunbo_Wang,Mehmet_C._Vuran,Steve_Goddard	2010	Stochastic Analysis of Energy Consumption in Wireless Sensor Networks.	db/conf/secon/secon2010.html#WangVG10
3847361	JeongGil_Ko,Qiang_Wang,Thomas_Schmid,Wanja_Hofer,Prabal_Dutta,Andreas_Terzis	2010	Egs: A Cortex M3-Based Mote Platform.	db/conf/secon/secon2010.html#KoWSHDT10
3847367	Soji_Omiwade,Rong_Zheng	2012	Online data recovery in wireless sensor networks.	db/conf/secon/secon2012.html#OmiwadeZ12
3847371	Jingyao_Zhang,Yi_Tang,Sachin_Hirve,Srikrishna_Iyer,Patrick_Schaumont,Yaling_Yang	2011	A software-hardware emulator for sensor networks.	db/conf/secon/secon2011.html#ZhangTHISY11
3847376	Zi_Feng,Jianxia_Ning,Ioannis_Broustis,Konstantinos_Pelechrinis,Srikanth_V._Krishnamurthy,Michalis_Faloutsos	2011	Coping with packet replay attacks in wireless networks.	db/conf/secon/secon2011.html#FengNBPKF11
3847378	Mohammed_Raza_Kanjee,Kalyani_Divi,Hong_Liu	2010	A Physiological Authentication Scheme in Secure Healthcare Sensor Networks.	db/conf/secon/secon2010.html#KanjeeDL10
3847379	Alfred_Asterjadhi,Raju_Kumar,Thomas_F._La_Porta,Michele_Zorzi	2011	Broadcasting in multi channel wireless networks in the presence of adversaries.	db/conf/secon/secon2011.html#AsterjadhiKPZ11
3847381	Xin_Wang_0003	2010	Fair Energy-Efficient Network Design for Multihop Communications.	db/conf/secon/secon2010.html#Wang10
3847384	Cheolgi_Kim,Mu_Sun,Maryam_Rahmaniheris,Lui_Sha	2012	How to reliably integrate medical devices over wireless.	db/conf/secon/secon2012.html#KimSRS12
3847392	Jing_Feng,Che-Wei_Chang,Serkan_Sayilir,Yung-Hsiang_Lu,Byunghoo_Jung,Dimitrios_Peroulis,Y._Charlie_Hu	2010	Energy-Efficient Transmission for Beamforming in Wireless Sensor Networks.	db/conf/secon/secon2010.html#FengCSLJPH10
3847394	Baozhi_Chen,Dario_Pompili	2011	QUO VADIS: QoS-aware underwater optimization framework for inter-vehicle communication using acoustic directional transducers.	db/conf/secon/secon2011.html#ChenP11
3847395	Chih-Hsiang_Hsueh,Yi-Hsuan_Tu,Yen-Chiu_Li,Pai_H._Chou	2010	EcoExec: An Interactive Execution Framework for Ultra Compact Wireless Sensor Nodes.	db/conf/secon/secon2010.html#HsuehTLC10
3847397	Markus_Eisenhauer,Christian_Prause,Marco_Jahn,Marc_Jentsch	2010	Middleware for Wireless Devices and Sensors - Energy Efficiency at Device Level.	db/conf/secon/secon2010.html#EisenhauerPJJ10
3847399	John_Tooker,Xin_Dong_0008,Mehmet_Can_Vuran,Suat_Irmak	2012	Connecting soil to the cloud: A wireless underground sensor network testbed.	db/conf/secon/secon2012.html#TookerDVI12
3847400	Wei_Peng,Feng_Li,Xukai_Zou,Jie_Wu_0001	2012	A privacy-preserving social-aware incentive system for word-of-mouth advertisement dissemination on smart mobile devices.	db/conf/secon/secon2012.html#PengLZW12a
3847401	Onur_Soysal,Sami_Ayyorgun,Murat_Demirbas	2011	PowerNap: An energy efficient MAC layer for random routing in wireless sensor networks.	db/conf/secon/secon2011.html#SoysalAD11
3847405	Paria_Moinzadeh,Kirill_Mechitov,Reza_Shiftehfar,Tarek_F._Abdelzaher,Gul_Agha,Billie_F._Spencer	2012	The time-keeping anomaly of energy-saving sensors: Manifestation, solution, and a structural monitoring case study.	db/conf/secon/secon2012.html#MoinzadehMSAAS12
3847411	Fan_Wu,Nitin_H._Vaidya	2012	Workload-aware opportunistic routing in multi-channel, multi-radio wireless mesh networks.	db/conf/secon/secon2012.html#WuV12
3847413	Anna_Abbagnale,Francesca_Cuomo	2010	Connectivity-Driven Routing for Cognitive Radio Ad-Hoc Networks.	db/conf/secon/secon2010.html#AbbagnaleC10
3847415	Shehla_S._Rana,Nitin_H._Vaidya	2012	Watchdogs to the rescue: Securing wireless TCP.	db/conf/secon/secon2012.html#RanaV12
3847416	Pradeep_B._Nagaraju,Lei_Ding,Tommaso_Melodia,Stella_N._Batalama,Dimitrios_A._Pados,John_D._Matyjas	2010	Implementation of a Distributed Joint Routing and Dynamic Spectrum Allocation Algorithm on USRP2 Radios.	db/conf/secon/secon2010.html#NagarajuDMBPM10
3847423	Jaebeom_Kim,Keun_Woo_Lim,Young-Bae_Ko	2012	Contention mitigated EDCA algorithm for reliable smart grid mesh networks.	db/conf/secon/secon2012.html#KimLK12
3847428	Yong_Li_0008,Pan_Hui,Depeng_Jin,Li_Su,Lieguang_Zeng	2011	An optimal distributed malware defense system for mobile networks with heterogeneous devices.	db/conf/secon/secon2011.html#LiHJSZ11
3847432	Jisu_Kim,Jae-Hyun_Kim	2012	The user-centric mobility support scheme.	db/conf/secon/secon2012.html#KimK12
3847443	Giordano_Fusco,Himanshu_Gupta	2010	Placement and Orientation of Rotating Directional Sensors.	db/conf/secon/secon2010.html#FuscoG10
3847450	Hongyu_Zhou,Ning_Ding,Miao_Jin,Su_Xia,Hongyi_Wu	2011	Distributed algorithms for bottleneck identification and segmentation in 3D wireless sensor networks.	db/conf/secon/secon2011.html#ZhouDJXW11
3847453	Lawrence_Cheng,Gregor_Kuntze,Huiling_Tan,David_Nguyen,Kyle_Roskilly,John_Lowe,Ian_N._Bezodis,Tony_Austin,Stephen_Hailes,David_G._Kerwin,Alan_Wilson,Dipak_Kalra	2010	Practical Sensing for Sprint Parameter Monitoring.	db/conf/secon/secon2010.html#ChengKTNRLBAHKWK10
3847456	Farhana_Ashraf,Nitin_H._Vaidya,Robin_Kravets	2011	Any-MAC: Extending any asynchronous MAC with anycast to improve delay in WSN.	db/conf/secon/secon2011.html#AshrafVK11
3847457	Chul-Ho_Lee,Do_Young_Eun	2012	Toward distributed optimal movement strategy for data harvesting in wireless sensor networks.	db/conf/secon/secon2012.html#LeeE12
3847459	Furqan_Hameed_Khan,Young-June_Choi	2012	Towards introducing self-configurability in cognitive femtocell networks.	db/conf/secon/secon2012.html#KhanC12
3847460	Francesco_Malandrino,Claudio_Casetti,Carla-Fabiana_Chiasserini,Marco_Fiore	2012	Offloading cellular networks through ITS content download.	db/conf/secon/secon2012.html#MalandrinoCCF12
3847466	Antimo_Barbato,L._Borsani,Antonio_Capone	2010	A Wireless Sensor Network Based System for Reducing Home Energy Consumption.	db/conf/secon/secon2010.html#BarbatoBC10
3847472	Bor-rong_Chen,Thomas_Buckley,Ramona_Rednic,Shyamal_Patel,Paolo_Bonato,Matt_Welsh	2010	MercuryLive: A Web-Enhanced Platform for Long-Term High Fidelity Motion Analysis.	db/conf/secon/secon2010.html#ChenBRPBW10
3847473	Ildefonso_de_la_Cruz,Okhwan_Lee,Sunghyun_Choi	2012	Measurement-based Call Admission Control algorithm for multi-rate VoWLANs.	db/conf/secon/secon2012.html#CruzLC12
3847474	Bogdan_Carbunar,Mahesh_V._Tripunitara	2010	Fair Payments for Outsourced Computations.	db/conf/secon/secon2010.html#CarbunarT10
3847475	Reuven_Cohen,Alexander_Landau	2010	A Scalable Scheme for Preventing Feedback Implosion in a Large-Scale Multi-Tier Sensor Network.	db/conf/secon/secon2010.html#CohenL10
3847476	Matt_Calder,Mahesh_K._Marina	2010	Batch Scheduling of Recurrent Applications for Energy Savings on Mobile Phones.	db/conf/secon/secon2010.html#CalderM10
3847480	Jingyao_Zhang,Srikrishna_Iyer,Patrick_Schaumont,Yaling_Yang	2012	Simulating power/energy consumption of sensor nodes with flexible hardware in wireless networks.	db/conf/secon/secon2012.html#ZhangISY12
3847481	Morten_Tranberg_Hansen,Branislav_Kusy,Raja_Jurdak,Koen_Langendoen	2012	AutoSync: Automatic duty-cycle control for synchronous low-power listening.	db/conf/secon/secon2012.html#HansenKJL12
3847482	Ashikur_Rahman,Carey_L._Williamson	2012	Delta-graphs for wireless ad hoc networks.	db/conf/secon/secon2012.html#RahmanW12
3847484	Na_Yu,Qi_Han	2011	MEMS: Detection and tracking of mobile events using mobile sensors.	db/conf/secon/secon2011.html#YuH11
3847496	Anthony_Schoofs,Antonio_Guerrieri,Declan_T._Delaney,Gregory_M._P._O'Hare,Antonio_G._Ruzzelli	2010	ANNOT: Automated Electricity Data Annotation Using Wireless Sensor Networks.	db/conf/secon/secon2010.html#SchoofsGDOR10
3847501	Vikram_Gupta,Junsung_Kim,Aditi_Pandya,Karthik_Lakshmanan,Ragunathan_Rajkumar,Eduardo_Tovar	2011	Nano-CF: A coordination framework for macro-programming in Wireless Sensor Networks.	db/conf/secon/secon2011.html#GuptaKPLRT11
3847504	Majid_Nabi,Marc_Geilen,Twan_Basten	2012	On-demand data forwarding for automatic adaptation of data propagation in WBANs.	db/conf/secon/secon2012.html#NabiGB12a
3847509	Wei_Wang_0030,Baochun_Li,Ben_Liang	2011	District: Embracing local markets in truthful spectrum double auctions.	db/conf/secon/secon2011.html#0030LL11
3847510	Hanan_Shpungin,Ajay_Gopinathan,Zongpeng_Li	2011	Capacity bounds for energy efficient data streaming in homogeneous wireless ad hoc networks.	db/conf/secon/secon2011.html#ShpunginGL11
3847514	Junmei_Yao,Tao_Xiong,Wei_Lou	2012	Elimination of exposed terminal problem using signature detection.	db/conf/secon/secon2012.html#YaoXL12
3847515	Su_Xia,Miao_Jin,Hongyi_Wu,Hongyu_Zhou	2012	Bubble routing: A scalable algorithm with guaranteed delivery in 3D sensor networks.	db/conf/secon/secon2012.html#XiaJWZ12
3847517	Haibo_Zhang_0001,sterlind,Pablo_Soldati,Thiemo_Voigt,Mikael_Johansson	2010	Rapid Convergecast on Commodity Hardware: Performance Limits and Optimal Policies.	db/conf/secon/secon2010.html#ZhangOSVJ10
3847526	Bo_Yu_0002,Jianzhong_Li	2011	Minimum-time aggregation scheduling in multi-sink sensor networks.	db/conf/secon/secon2011.html#YuL11
3847527	Yi_Gai,Bhaskar_Krishnamachari,Mingyan_Liu	2012	Online learning for combinatorial network optimization with restless Markovian rewards.	db/conf/secon/secon2012.html#GaiKL12
3847529	Shaxun_Chen,Kai_Zeng,Ningning_Cheng,Prasant_Mohapatra	2012	Transmit power estimation with a single monitor in multi-band networks.	db/conf/secon/secon2012.html#ChenZCM12
3847532	Keun_Woo_Lim,Young-Bae_Ko,Sung-Hee_Lee,Sangjoon_Park	2011	Congestion-aware multi-gateway routing for wireless mesh video surveillance networks.	db/conf/secon/secon2011.html#LimKLP11
3847537	Junaid_Ansari,Xi_Zhang,Gianpaolo_Cugola,Matteo_Migliavacca,M._Bennebroek,nen	2010	Wirelessly Accessible Sensor Populations (WASP): Cross-Layer Design of Low Power Medium Access and Content Based Routing.	db/conf/secon/secon2010.html#AnsariZCMBM10
3847540	John_Tooker,Mehmet_Can_Vuran	2012	Mobile data harvesting in wireless underground sensor networks.	db/conf/secon/secon2012.html#TookerV12
3847541	Nasif_Bin_Shafi,Kashif_Ali,Hossam_S._Hassanein	2012	No-reboot and zero-flash over-the-air programming for Wireless Sensor Networks.	db/conf/secon/secon2012.html#ShafiAH12
3847543	Ting_He,Kang-Won_Lee,Nikoletta_Sofra,Kin_K._Leung	2010	Utility-Based Gateway Deployment for Supporting Multi-Domain DTNs.	db/conf/secon/secon2010.html#HeLSL10
3847544	Douglas_M._Blough,Giovanni_Resta,Paolo_Santi,Ramya_Srinivasan,a	2011	Optimal one-shot scheduling for MIMO networks.	db/conf/secon/secon2011.html#BloughRSSC11
3847547	Majid_Nabi,Milos_Blagojevic,Marc_Geilen,Twan_Basten,Teun_Hendriks	2010	MCMAC: An Optimized Medium Access Control Protocol for Mobile Clusters in Wireless Sensor Networks.	db/conf/secon/secon2010.html#NabiBGBH10
3847548	Lin_Gao,Xinbing_Wang,Gaofei_Sun,Youyun_Xu	2011	A game approach for cell selection and resource allocation in heterogeneous wireless networks.	db/conf/secon/secon2011.html#GaoWSX11
3847549	Sang_Wu_Kim	2012	Integrated detection and mitigation of pollution attack in wireless network coding: Physical layer approach.	db/conf/secon/secon2012.html#Kim12
3847553	Atif_Ismail,Byeong-Hee_Roh	2012	Enhancing MIH for optimum network performance and handovers in heterogeneous networks.	db/conf/secon/secon2012.html#IsmailR12
3847554	Dan_Xu,Xin_Liu_0002,Zhu_Han	2010	A Two-Tier Market for Decentralized Dynamic Spectrum Access in Cognitive Radio Networks.	db/conf/secon/secon2010.html#XuLH10
3847556	Sanjit_Krishnan_Kaul,Marco_Gruteser,Vinuth_Rai,John_B._Kenney	2011	Minimizing age of information in vehicular networks.	db/conf/secon/secon2011.html#KaulGRK11
3847557	Yaxiong_Zhao,Jie_Wu_0001	2011	On the construction of the minimum cost content-based publish/subscribe overlays.	db/conf/secon/secon2011.html#ZhaoW11
3847561	Zesheng_Chen,Chao_Chen	2011	Adaptive energy-efficient spectrum probing in cognitive radio networks.	db/conf/secon/secon2011.html#ChenC11
3847563	Kien_A._Hua,Fei_Xie	2010	A Dynamic Stream Merging Technique for Video-on-Demand Services over Wireless Mesh Access Networks.	db/conf/secon/secon2010.html#HuaX10
3847564	Jaeseok_Kim,Haeyong_Kim,Jongsoo_Jeong,Yongbin_Seo,Pyeong_Soo_Mah	2010	Field Deployment of a Large-Scale WSN for Parking Management System.	db/conf/secon/secon2010.html#KimKJSM10
3847566	Piotr_Szczytowski,Abdelmajid_Khelil,Azad_Ali,Neeraj_Suri	2011	TOM: Topology oriented maintenance in sparse Wireless Sensor Networks.	db/conf/secon/secon2011.html#SzczytowskiKAS11
3847582	Wuqiong_Luo,Wee-Peng_Tay	2012	Identifying infection sources in large tree networks.	db/conf/secon/secon2012.html#LuoT12
3847585	Zhangyu_Guan,Tommaso_Melodia,Dongfeng_Yuan	2011	Optimizing cooperative video streaming in wireless networks.	db/conf/secon/secon2011.html#GuanMY11
3847588	Jun-Ho_Jeon,Sung-Joon_Park	2010	Implementation of a Low-Power Acoustic Modem for Underwater Wireless Sensor Networks.	db/conf/secon/secon2010.html#JeonP10
3847596	Andreas_Achtzehn,rvi,nez_Vargas,Marina_Petrova,nen	2012	Improving coverage prediction for primary multi-transmitter networks operating in the TV whitespaces.	db/conf/secon/secon2012.html#AchtzehnRVPM12
3847598	Antonio_G._Ruzzelli,C._Nicolas,Anthony_Schoofs,Gregory_M._P._O'Hare	2010	Real-Time Recognition and Profiling of Appliances through a Single Electricity Sensor.	db/conf/secon/secon2010.html#RuzzelliNSO10
3847599	Shanshan_Zheng,John_S._Baras	2011	Trust-assisted anomaly detection and localization in wireless sensor networks.	db/conf/secon/secon2011.html#ZhengB11
3847602	Qiong_Huo,Subir_Biswas,Anthony_Plummer_Jr.	2011	Ultra wide band impulse switching protocols for event and target tracking applications.	db/conf/secon/secon2011.html#HuoBP11
3847603	Andrew_Newell,Cristina_Nita-Rotaru	2012	Split Null Keys: A null space based defense for pollution attacks in wireless network coding.	db/conf/secon/secon2012.html#NewellN12
3847617	S._M._Iftekharul_Alam,Sonia_Fahmy	2012	An energy-efficient approach for provenance transmission in wireless sensor networks.	db/conf/secon/secon2012.html#AlamF12
3847622	B._Anggorjati,etin,Albena_Mihovska,Neeli_R._Prasad	2010	RFID Added Value Sensing Capabilities: European Advances in Integrated RFID-WSN Middleware.	db/conf/secon/secon2010.html#AnggorjatiCMP10
3847632	Anand_Kashyap,Utpal_Paul,Samir_R._Das	2010	Deconstructing Interference Relations in WiFi Networks.	db/conf/secon/secon2010.html#KashyapPD10
3847634	Xinlei_Wang_0002,Kannan_Govindan,Prasant_Mohapatra	2011	Collusion-resilient quality of information evaluation based on information provenance.	db/conf/secon/secon2011.html#WangGM11
3847636	Jindan_Zhu,Kai_Zeng,Kyu-Han_Kim,Prasant_Mohapatra	2012	Improving crowd-sourced Wi-Fi localization systems using Bluetooth beacons.	db/conf/secon/secon2012.html#ZhuZKM12
3847640	Andreea_Picu,Thrasyvoulos_Spyropoulos	2012	Forecasting DTN performance under heterogeneous mobility: The case of limited replication.	db/conf/secon/secon2012.html#PicuS12
3847653	Karim_Habak,Khaled_A._Harras,Moustafa_Youssef	2012	OPERETTA: Demonstrating an optimal energy efficient bandwidth aggregation system.	db/conf/secon/secon2012.html#HabakHY12
3847654	Sriram_Lakshmanan,Jeongkeun_Lee,l_H._Etkin,Sung-Ju_Lee,Raghupathy_Sivakumar	2011	Realizing high performance multi-radio 802.11n wireless networks.	db/conf/secon/secon2011.html#LakshmananLELS11
3847655	JeongGil_Ko,Nicolas_Tsiftes,Adam_Dunkels,Andreas_Terzis	2012	Pragmatic low-power interoperability: ContikiMAC vs TinyOS LPL.	db/conf/secon/secon2012.html#KoTDT12
3847657	Kai_Bu,Bin_Xiao,Qingjun_Xiao,Shigang_Chen	2011	Efficient pinpointing of misplaced tags in large RFID systems.	db/conf/secon/secon2011.html#BuXXC11
3847659	Nils_Glombitza,Dennis_Pfisterer,Stefan_Fischer_0001	2010	LTP: An Efficient Web Service Transport Protocol for Resource Constrained Devices.	db/conf/secon/secon2010.html#GlombitzaPF10
3847664	Abderrahmen_Mtibaa,Khaled_A._Harras	2011	FOG: Fairness in mobile opportunistic networking.	db/conf/secon/secon2011.html#MtibaaH11
3847673	Greg_Fletcher,Xu_Li,Amiya_Nayak,Ivan_Stojmenovic	2010	Back-Tracking Based Sensor Deployment by a Robot Team.	db/conf/secon/secon2010.html#FletcherLNS10
3847678	Alexandru_Caracas,Clemens_Lombriser,Yvonne_Anne_Pignolet,Thorsten_Kramp,Thomas_Eirich,Rolf_Adelsberger,Urs_Hunkeler	2011	Energy-efficiency through micro-managing communication and optimizing sleep.	db/conf/secon/secon2011.html#CaracasLPKEAH11
3847679	Li-Chung_Kuo,Tommaso_Melodia	2012	Cross-layer routing on MIMO-OFDM underwater acoustic links.	db/conf/secon/secon2012.html#KuoM12
3847683	Kwangjae_Sung,Hwangnam_Kim	2012	Bayesian navigation system with particle filtering and dead reckoning in urban canyon environments.	db/conf/secon/secon2012.html#SungK12
3847686	Dong_Wang,Lance_M._Kaplan,Tarek_F._Abdelzaher,Charu_C._Aggarwal	2012	On scalability and robustness limitations of real and asymptotic confidence bounds in social sensing.	db/conf/secon/secon2012.html#WangKAA12
3847687	Ji-Hoon_Yun,Kang_G._Shin	2012	ARCHoN: Adaptive range control of hotzone cells in heterogeneous cellular networks.	db/conf/secon/secon2012.html#YunS12
3847688	Federico_Ferrari,Andreas_Meier_0003,Lothar_Thiele	2010	Secondis: An Adaptive Dissemination Protocol for Synchronizing Wireless Sensor Networks.	db/conf/secon/secon2010.html#FerrariMT10
3847690	Affan_A._Syed,John_S._Heidemann,Wei_Ye	2010	Tones for Real: Managing Multipath in Underwater Acoustic Wakeup.	db/conf/secon/secon2010.html#SyedHY10
3847693	Tie_Luo,Chen-Khong_Tham	2012	Fairness and social welfare in incentivizing participatory sensing.	db/conf/secon/secon2012.html#LuoT12a
3847695	Weifei_Zeng,Chris_T._K._Ng,dard	2012	Joint coding and scheduling optimization in wireless systems with varying delay sensitivities.	db/conf/secon/secon2012.html#ZengNM12
3847701	Seungku_Kim,Seokhwan_Kim,Jin-Woo_Kim,Doo_Seop_Eom	2012	Flexible beacon scheduling scheme for interference mitigation in body sensor networks.	db/conf/secon/secon2012.html#KimKKE12
3847703	Yanxiao_Zhao,Min_Song,Chunsheng_Xin	2011	Delay analysis for cognitive radio networks supporting heterogeneous traffic.	db/conf/secon/secon2011.html#ZhaoSX11
3847705	Zheng_Wang_0006,Mingyue_Ji,Hamid_R._Sadjadpour,J._J._Garcia-Luna-Aceves	2010	Opportunistic Interference Management Increases the Capacity of Ad Hoc Networks.	db/conf/secon/secon2010.html#WangJSG10
3847709	Razvan_Stanica,Emmanuel_Chaput,-Luc_Beylot	2012	Congestion control in CSMA-based vehicular networks: Do not forget the carrier sensing.	db/conf/secon/secon2012.html#StanicaCB12
3847710	Hooman_Javaheri,Guevara_Noubir	2010	iPoint: A Platform-Independent Passive Information Kiosk for Cell Phones.	db/conf/secon/secon2010.html#JavaheriN10
3847713	Vibhav_Kapnadak,Edward_J._Coyle	2011	Optimal non-uniform deployment of sensors for detection in single-hop Wireless Sensor Networks.	db/conf/secon/secon2011.html#KapnadakC11
3847715	Muzammil_Hussain,Niki_Trigoni	2011	Dynamic node placement for multi-hop localization in cluttered environments.	db/conf/secon/secon2011.html#HussainT11
3847716	Reuven_Cohen,Boris_Kapchits	2011	Energy-delay optimization in an asynchronous sensor network with multiple gateways.	db/conf/secon/secon2011.html#CohenK11
3847718	Ashwini_Kumar,Kang_G._Shin	2010	Managing TCP Connections in Dynamic Spectrum Access Based Wireless LANs.	db/conf/secon/secon2010.html#KumarS10
3847731	Pu_Wang,Ian_F._Akyildiz	2012	Network stability of cognitive radio networks in the presence of heavy tailed traffic.	db/conf/secon/secon2012.html#WangA12
3847736	Abdallah_Khreishah,Issa_M._Khalil,Jie_Wu_0001	2012	Universal opportunistic routing scheme using network coding.	db/conf/secon/secon2012.html#KhreishahKW12
3847738	Claude_Chaudet,Nicola_Costagliola,Isabelle_M._Demeure,Salma_Ktari,Samuel_Tardieu	2012	Building an efficient overlay for publish/subscribe in wireless sensor networks.	db/conf/secon/secon2012.html#ChaudetCDKT12
3847741	Sergio_Salinas,Ming_Li_0006,Pan_Li_0001	2012	Privacy-preserving energy theft detection in smart grids.	db/conf/secon/secon2012.html#SalinasLL12
3847748	Yen-Ting_Lin,Kewal_K._Saluja,Parameswaran_Ramanathan	2010	Connected Barrier Coverage on a Narrow Band: Analysis and Deployment.	db/conf/secon/secon2010.html#LinSR10
3847757	Chanmin_Yoon,Yohan_Chon,Hojung_Cha	2012	PION: Human mobility-based service provisioning framework for smartphone users.	db/conf/secon/secon2012.html#YoonCC12
3847758	Adnan_Majeed,Nael_B._Abu-Ghazaleh	2012	Packet aggregation in multi-rate wireless LANs.	db/conf/secon/secon2012.html#MajeedA12
3847767	Victor_K._Y._Wu,Nitin_H._Vaidya	2010	Efficient Access Protocols for High Storage RFID.	db/conf/secon/secon2010.html#WuV10a
3847769	Emad_Felemban,Robert_Murawski,Eylem_Ekici,Sangjoon_Park,Kangwoo_Lee,Juderk_Park,Zeeshan_Hameed_Mir	2010	SAND: Sectored-Antenna Neighbor Discovery Protocol for Wireless Networks.	db/conf/secon/secon2010.html#FelembanMEPLPH10
3847772	Nhat_X._Lam,Trac_N._Nguyen,Min_Kyung_An,Dung_T._Huynh	2011	Dual power assignment optimization for k-edge connectivity in WSNs.	db/conf/secon/secon2011.html#LamNAH11
3847774	Sebastian_Cartier,Saket_Sathe,Dipanjan_Chakraborty_0001,Karl_Aberer	2012	ConDense: Managing data in community-driven mobile geosensor networks.	db/conf/secon/secon2012.html#CartierSCA12
3847777	Tao_Shu,Marwan_Krunz	2010	Exploiting Microscopic Spectrum Opportunities in Cognitive Radio Networks.	db/conf/secon/secon2010.html#ShuK10
3847778	Roman_Chertov,Kevin_C._Almeroth	2010	Using BGP in a Satellite-Based Challenged Network Environment.	db/conf/secon/secon2010.html#ChertovA10
3847780	Majid_Nabi,Milos_Blagojevic,Marc_Geilen,Twan_Basten	2011	Dynamic data prioritization for quality-of-service differentiation in heterogeneous Wireless Sensor Networks.	db/conf/secon/secon2011.html#NabiBGB11
3847787	Shibo_He,Jiming_Chen,David_K._Y._Yau,Youxian_Sun	2010	Cross-Layer Optimization of Correlated Data Gathering in Wireless Sensor Networks.	db/conf/secon/secon2010.html#HeCYS10
3847788	Chi_Harold_Liu,Chatschik_Bisdikian,Joel_W._Branch,Kin_K._Leung	2010	QoI-Aware Wireless Sensor Network Management for Dynamic Multi-Task Operations.	db/conf/secon/secon2010.html#LiuBBL10
3847793	Utpal_Paul,Riccardo_Crepaldi,Jeongkeun_Lee,Sung-Ju_Lee,l_H._Etkin	2011	Characterizing WiFi link performance in open outdoor networks.	db/conf/secon/secon2011.html#PaulCLLE11
3847796	Sokol_Kosta,Alessandro_Mei,Julinda_Stefa	2010	Small World in Motion (SWIM): Modeling Communities in Ad-Hoc Mobile Networking.	db/conf/secon/secon2010.html#KostaMS10
3847797	Anthony_Schoofs,Alex_Sintoni,Gregory_M._P._O'Hare,Antonio_G._Ruzzelli	2010	Demo Abstract: Appliance Load Monitoring by Power Load Disaggregation.	db/conf/secon/secon2010.html#SchoofsSOR10
3847801	Veljko_Pejovic,Elizabeth_M._Belding	2011	A context-aware approach to wireless transmission adaptation.	db/conf/secon/secon2011.html#PejovicB11
3847805	Yang_Zhao,Neal_Patwari	2011	Noise reduction for variance-based radio tomographic localization.	db/conf/secon/secon2011.html#ZhaoP11
3847817	Jae-Joon_Lee,Jaesung_Lim	2012	Implications of route oscillation in partial interference.	db/conf/secon/secon2012.html#LeeL12
3847829	Eric_Jung,Dhruv_Gupta_0001,Nicholas_Mastronarde,Xin_Liu_0002	2012	Network-congestion-aware video streaming: A rest-and-download approach.	db/conf/secon/secon2012.html#JungGML12
3847830	Yunzhong_Liu,Rui_Zhang_0007,Jing_Shi,Yanchao_Zhang	2010	Traffic Inference in Anonymous MANETs.	db/conf/secon/secon2010.html#LiuZSZ10
3847836	Eun-Sook_Sung,Miodrag_Potkonjak	2010	Optimized Operation for Infrastructure-Supported Wireless Sensor Networks.	db/conf/secon/secon2010.html#SungP10
3847843	Syed_Taha_Ali,Vijay_Sivaraman,Diethelm_Ostry	2012	Authentication of lossy data in body-sensor networks for healthcare monitoring.	db/conf/secon/secon2012.html#AliSO12
3847844	Wei_Shen,Qishi_Wu	2011	Exploring redundancy in sensor deployment to maximize network lifetime and coverage.	db/conf/secon/secon2011.html#ShenW11
3847851	Tong_Shu,Min_Liu,Zhongcheng_Li,Qishi_Wu	2011	Interference pair-based distributed spectrum allocation in wireless mesh networks with frequency-agile radios.	db/conf/secon/secon2011.html#ShuLLW11
3847859	Nancy_Alonistioti,Egon_Schulz,Andreas_Merentitis,Makis_Stamatelatos,B._Bochow,Pieter_Ballon,Markus_Mueck,Liesbet_Van_der_Perre,Tim_Lewis,Ioannis_P._Chochliouros	2010	Cooperative and Self-Growing Energy-Aware Networks.	db/conf/secon/secon2010.html#AlonistiotiSMSBBMPLC10
3847863	Junaid_Ansari,Tobias_Ang,nen	2010	Spectrum Agile Medium Access Control Protocol for Wireless Sensor Networks.	db/conf/secon/secon2010.html#AnsariAM10
3847865	Ying_Huang,Yan_Gao,Klara_Nahrstedt	2010	Relay Placement for Reliable Base Station Connectivity in Polymorphous Networks.	db/conf/secon/secon2010.html#HuangGN10
3847872	J._J._Garcia-Luna-Aceves,Ashok_N._Masilamani	2011	NOMAD: Deterministic collision-free channel access with channel reuse in wireless networks.	db/conf/secon/secon2011.html#Garcia-Luna-AcevesM11
3847874	Jian_Tang,Li_Zhang,Richard_S._Wolff,Weiyi_Zhang	2010	Leveraging Cognitive Radios for Effective Communications over Water.	db/conf/secon/secon2010.html#TangZWZ10
3847878	S._M._Iftekharul_Alam,Salmin_Sultana,Y._Charlie_Hu,Sonia_Fahmy	2012	Link correlation and network coding in broadcast protocols for wireless sensor networks.	db/conf/secon/secon2012.html#AlamSHF12
3847892	Venkat_Iyer,Matthias_Woehrle,Koen_Langendoen	2011	Chrysso - A multi-channel approach to mitigate external interference.	db/conf/secon/secon2011.html#IyerWL11
3847901	Hassan_Ghasemzadeh,Roozbeh_Jafari	2010	Data Aggregation in Body Sensor Networks: A Power Optimization Technique for Collaborative Signal Processing.	db/conf/secon/secon2010.html#GhasemzadehJ10
3847916	Boram_Choi,Hyuk_Lim,Hyunduk_Kang,Byung_Jang_Jeong	2012	Dynamic priority scheduling for heterogeneous cognitive radio networks.	db/conf/secon/secon2012.html#ChoiLKJ12
3847917	Baozhi_Chen,Patrick_C._Hickey,Dario_Pompili	2010	Trajectory-Aware Communication Solution for Underwater Gliders Using WHOI Micro-Modems.	db/conf/secon/secon2010.html#ChenHP10
3847919	Yi_Wang,Bhaskar_Krishnamachari,Murali_Annavaram	2012	Semi-Markov state estimation and policy optimization for energy efficient mobile sensing.	db/conf/secon/secon2012.html#WangKA12
3847925	Thivya_Kandappu,Vijay_Sivaraman,Roksana_Boreli	2012	A novel unbalanced tree structure for low-cost authentication of streaming content on mobile and sensor devices.	db/conf/secon/secon2012.html#KandappuSB12
3847928	Sardorbek_Muminov,Nam-Yeol_Yun,Seung-Won_Shin,Soo-Hyun_Park,Jun-Ho_Jeon,Chang-Gi_Hong,Sung-Joon_Park,Changhwa_Kim,Gi-Hun_Yang,Young-Sun_Ryuh	2012	Biomimetic fish robot controlling system by using underwater acoustic signal.	db/conf/secon/secon2012.html#MuminovYSPJHPKYR12
3847930	Dabin_Kim,Jaebeom_Kim,Woo_Sung_Jung,Young-Bae_Ko,Younghyun_Kim	2012	Developing the IEEE 802.11s based reliable Smart Grid mesh networks.	db/conf/secon/secon2012.html#KimKJKK12
3847931	Fredrick_J._Berchmans,Wing-Kai_Hon,Abner_C._Y._Huang,Chih-Shan_Liu,Eric_Lo,David_K._Y._Yau	2010	Optimizing Link Assignment to Enhance Service in Probabilistic Network.	db/conf/secon/secon2010.html#BerchmansHHLLY10
3847933	Victor_K._Y._Wu,Nitin_H._Vaidya	2010	RFID Trees: A Distributed RFID Tag Storage Infrastructure for Forest Search and Rescue.	db/conf/secon/secon2010.html#WuV10
3847945	Jalaluddin_Qureshi,Chuan_Heng_Foh,Jianfei_Cai	2012	Optimal solution for the index coding problem using network coding over GF(2).	db/conf/secon/secon2012.html#QureshiFC12
3847948	Greggory_P._Carpenter,Lei_Chen_0018,Jeff_Frolik	2011	Demonstrating distributed consensus building by locating the spatial centroid of a WSN.	db/conf/secon/secon2011.html#CarpenterCF11
3847951	Tony_O'Donovan,James_Brown,Utz_Roedig,Cormac_J._Sreenan,J._do_O,Adam_Dunkels,A._Klein,Silva,Vasos_Vassiliou,Lars_C._Wolf	2010	GINSENG: Performance Control in Wireless Sensor Networks.	db/conf/secon/secon2010.html#ODonovanBRSODKSVW10
3847956	Long_Le	2010	Practical Multi-Channel MAC for Ad Hoc Networks.	db/conf/secon/secon2010.html#Le10
3847959	Fan_Qiu,Yuan_Xue	2012	Robust joint congestion control and scheduling for time-varying multihop wireless networks with time delay.	db/conf/secon/secon2012.html#QiuX12
3847961	Dulanjalie_C._Dhanapala,Anura_P._Jayasumana	2011	Geo-logical routing in wireless sensor networks.	db/conf/secon/secon2011.html#DhanapalaJ11
3847962	Scott_Pudlewski,Tommaso_Melodia,Arvind_Prasanna	2010	C-DMRC: Compressive Distortion-Minimizing Rate Control for Wireless Multimedia Sensor Networks.	db/conf/secon/secon2010.html#PudlewskiMP10
3847963	Nicholas_Hubbell,Qi_Han	2011	Detection and tracking of dynamic amorphous events in wireless sensor networks.	db/conf/secon/secon2011.html#HubbellH11
3847978	Patrick_Pak-Ching_Lee,Hongying_Liu,John_Chi-Shing_Lui	2011	Analyzing credit evolution for credit-based incentive schemes in wireless mesh networks.	db/conf/secon/secon2011.html#LeeLL11
3847981	M._Aslam,Tauseef_Shah,Nadeem_Javaid,A._Rahim,Z._Rahman,Z._A._Khan	2012	CEEC: Centralized energy efficient clustering a new routing protocol for WSNs.	db/conf/secon/secon2012.html#AslamSJRRK12
3847985	Chen_Zhao,Mihail_L._Sichitiu	2010	N-Body: Social Based Mobility Model for Wireless Ad Hoc Network Research.	db/conf/secon/secon2010.html#ZhaoS10
3849858	Joshua_Reich,Oren_Laadan,Eli_Brosh,Alex_Sherman,Vishal_Misra,Jason_Nieh,Dan_Rubenstein	2012	VMTorrent: scalable P2P virtual machine streaming.	db/conf/conext/conext2012.html#ReichLBSMNR12
3849859	n,Michal_Kryczka,ngel_Cuevas,Sebastian_Kaune,Carmen_Guerrero,Reza_Rejaie	2010	Is content publishing in BitTorrent altruistic or profit-driven?	db/conf/conext/conext2010.html#RuminKCKGR10
3849860	Marios_Iliofotou,Brian_Gallagher,Tina_Eliassi-Rad,Guowu_Xie,Michalis_Faloutsos	2010	Profiling-By-Association: a resilient traffic profiling solution for the internet backbone.	db/conf/conext/conext2010.html#IliofotouGEXF10
3849865	George_Dean_Bissias,Brian_Neil_Levine,Ramesh_K._Sitaraman	2010	Assessing the vulnerability of replicated network services.	db/conf/conext/conext2010.html#BissiasLS10
3849884	Ajay_Mahimkar,Zihui_Ge,Jia_Wang,Jennifer_Yates,Yin_Zhang,Joanne_Emmons,Brian_Huntley,Mark_Stockert	2011	Rapid detection of maintenance induced changes in service performance.	db/conf/conext/conext2011.html#MahimkarGWYZEHS11
3849891	Bozidar_Radunovic,re,Dinan_Gunawardena,Peter_B._Key	2011	Dynamic channel, rate selection and scheduling for white spaces.	db/conf/conext/conext2011.html#RadunovicPGK11
3849892	Panayotis_Antoniadis,Serge_Fdida,Timur_Friedman,Vishal_Misra	2010	Federation of virtualized infrastructures: sharing the value of diversity.	db/conf/conext/conext2010.html#AntoniadisFFM10
3849904	Florian_Schmidt,Muhammad_Hamad_Alizai,Ismet_Aktas,Klaus_Wehrle	2011	Refector: heuristic header error recovery for error-tolerant transmissions.	db/conf/conext/conext2011.html#SchmidtAAW11
3849907	M._Abdul_Alim,Timothy_G._Griffin	2011	On the interaction of multiple routing algorithms.	db/conf/conext/conext2011.html#AlimG11
3849917	Minlan_Yu,Wenjie_Jiang,Haoyuan_Li,Ion_Stoica	2012	Tradeoffs in CDN designs for throughput oriented traffic.	db/conf/conext/conext2012.html#YuJLS12
3849925	Guibin_Tian,Yong_Liu	2012	Towards agile and smooth video adaptation in dynamic HTTP streaming.	db/conf/conext/conext2012.html#TianL12
3849930	Domenico_Giustiniano,Stefan_Mangold	2011	CAESAR: carrier sense-based ranging in off-the-shelf 802.11 wireless LAN.	db/conf/conext/conext2011.html#GiustinianoM11
3849935	Yongjun_Liao,Wei_Du,Pierre_Geurts,Guy_Leduc	2011	Decentralized prediction of end-to-end network performance classes.	db/conf/conext/conext2011.html#LiaoDGL11
3849936	Andrew_R._Curtis,Srinivasan_Keshav,pez-Ortiz	2010	LEGUP: using heterogeneity to reduce the cost of data center network upgrades.	db/conf/conext/conext2010.html#CurtisKL10
3849938	Theophilus_Benson,Ashok_Anand,Aditya_Akella,Ming_Zhang	2011	MicroTE: fine grained traffic engineering for data centers.	db/conf/conext/conext2011.html#BensonAAZ11
3849940	Ankit_Singla,Brighten_Godfrey,Kevin_R._Fall,Gianluca_Iannaccone,Sylvia_Ratnasamy	2010	Scalable routing on flat names.	db/conf/conext/conext2010.html#SinglaGFIR10
3849952	Edmond_W._W._Chan,Ang_Chen,Xiapu_Luo,Ricky_K._P._Mok,Weichao_Li,Rocky_K._C._Chang	2011	TRIO: measuring asymmetric capacity with three minimum round-trip times.	db/conf/conext/conext2011.html#ChanCLMLC11
3849968	He_Yan,Lee_Breslau,Zihui_Ge,Daniel_Massey,Dan_Pei,Jennifer_Yates	2010	G-RCA: a generic root cause analysis platform for service quality management in large IP networks.	db/conf/conext/conext2010.html#YanBGMPY10
3849977	Luigi_Rizzo,Giuseppe_Lettieri	2012	VALE, a switched ethernet for virtual machines.	db/conf/conext/conext2012.html#RizzoL12
3849978	Zartash_Afzal_Uzmi,Markus_E._Nebel,Ahsan_Tariq,Sana_Jawad,Ruichuan_Chen,Aman_Shaikh,Jia_Wang,Paul_Francis	2011	SMALTA: practical and near-optimal FIB aggregation.	db/conf/conext/conext2011.html#UzmiNTJCSWF11
3849980	Jad_Naous,Michael_Walfish,Antonio_Nicolosi,res,Michael_Miller,Arun_Seehra	2011	Verifying and enforcing network paths with icing.	db/conf/conext/conext2011.html#NaousWNMMS11
3849981	Layong_Luo,Gaogang_Xie,Steve_Uhlig,Laurent_Mathy,Salamatian,Yingke_Xie	2012	Towards TCAM-based scalable virtual routers.	db/conf/conext/conext2012.html#LuoXUMSX12
3849986	Romain_Fontugne,Pierre_Borgnat,Patrice_Abry,Kensuke_Fukuda	2010	MAWILab: combining diverse anomaly detectors for automated anomaly labeling and performance benchmarking.	db/conf/conext/conext2010.html#FontugneBAF10
3849993	Yeon-sup_Lim,Hyunchul_Kim,Jiwoong_Jeong,Chong-kwon_Kim,Ted_Taekyoung_Kwon,Yanghee_Choi	2010	Internet traffic classification demystified: on the sources of the discriminative power.	db/conf/conext/conext2010.html#LimKJKKC10
3849999	Mohammad_Y._Hajjat,Shankaranarayanan_P._N.,David_A._Maltz,Sanjay_G._Rao,Kunwadee_Sripanidkulchai	2012	Dealer: application-aware request splitting for interactive cloud applications.	db/conf/conext/conext2012.html#HajjatNMRS12
3850009	George_Nychis,Ranveer_Chandra,Thomas_Moscibroda,Ivan_Tashev,Peter_Steenkiste	2011	Reclaiming the white spaces: spectrum efficient coexistence with primary users.	db/conf/conext/conext2011.html#NychisCMTS11
3850015	Katerina_J._Argyraki,Petros_Maniatis,Ankit_Singla	2010	Verifiable network-performance measurements.	db/conf/conext/conext2010.html#ArgyrakiMS10
3850018	Ashwin_Rao,Arnaud_Legout,Yeon-sup_Lim,Don_Towsley,Chadi_Barakat,Walid_Dabbous	2011	Network characteristics of video streaming traffic.	db/conf/conext/conext2011.html#RaoLLTBD11
3850023	Vineet_Bharti,Pankaj_Kankar,Lokesh_Setia,rsun,Anukool_Lakhina,Mark_Crovella	2010	Inferring invisible traffic.	db/conf/conext/conext2010.html#BhartiKSGLC10
3850037	Ki-Young_Jang,Shuai_Hao,Anmol_Sheth,Ramesh_Govindan	2011	Snooze: energy management in 802.11n WLANs.	db/conf/conext/conext2011.html#JangHSG11
3850045	Lara_B._Deek,Eduard_Garcia_Villegas,Elizabeth_M._Belding,Sung-Ju_Lee,Kevin_C._Almeroth	2011	The impact of channel bonding on 802.11n network management.	db/conf/conext/conext2011.html#DeekVBLA11
3850052	Marc_Liberatore,Brian_Neil_Levine,Clay_Shields	2010	Strengthening forensic investigations of child pornography on P2P networks.	db/conf/conext/conext2010.html#LiberatoreLS10
3850055	Amogh_Dhamdhere,Constantine_Dovrolis	2010	The Internet is flat: modeling the transition from a transit hierarchy to a peering mesh.	db/conf/conext/conext2010.html#DhamdhereD10
3850058	Junchen_Jiang,Vyas_Sekar,Hui_Zhang_0001	2012	Improving fairness, efficiency, and stability in HTTP-based adaptive video streaming with FESTIVE.	db/conf/conext/conext2012.html#JiangSZ12
3850080	Shirin_Nilizadeh,Sonia_Jahid,Prateek_Mittal,Nikita_Borisov,Apu_Kapadia	2012	Cachet: a decentralized architecture for privacy preserving social networking with caching.	db/conf/conext/conext2012.html#NilizadehJMBK12
3850089	Andres_Garcia-Saavedra,Pablo_Serrano,Albert_Banchs,Giuseppe_Bianchi	2012	Energy consumption anatomy of 802.11 devices and its implication on modeling and design.	db/conf/conext/conext2012.html#Garcia-SaavedraSBB12
3850093	Arun_Vishwanath,Vijay_Sivaraman,Zhi_Zhao,Craig_Russell,Marina_Thottan	2011	Adapting router buffers for energy efficiency.	db/conf/conext/conext2011.html#VishwanathSZRT11
3850098	Rade_Stanojevic,Ignacio_Castro,Sergey_Gorinsky	2011	CIPT: using tuangou to reduce IP transit costs.	db/conf/conext/conext2011.html#StanojevicCG11
3850111	Fahad_R._Dogar,Peter_Steenkiste	2012	Architecting for edge diversity: supporting rich services over an unbundled transport.	db/conf/conext/conext2012.html#DogarS12
3850118	Bozidar_Radunovic,Ranveer_Chandra,Dinan_Gunawardena	2012	Weeble: enabling low-power nodes to coexist with high-power nodes in white space networks.	db/conf/conext/conext2012.html#RadunovicCG12
3850123	Nedeljko_Vasic,Prateek_Bhurat,Dejan_M._Novakovic,Marco_Canini,Satyam_Shekhar,Dejan_Kostic	2011	Identifying and using energy-critical paths.	db/conf/conext/conext2011.html#VasicBNCSK11
3850125	Xiaozheng_Tie,Anand_Seetharam,Arun_Venkataramani,Deepak_Ganesan,Dennis_Goeckel	2011	Anticipatory wireless bitrate control for blocks.	db/conf/conext/conext2011.html#TieSVGG11
3850134	Chuanxiong_Guo,Guohan_Lu,Helen_J._Wang,Shuang_Yang,Chao_Kong,Peng_Sun,Wenfei_Wu,Yongguang_Zhang	2010	SecondNet: a data center network virtualization architecture with bandwidth guarantees.	db/conf/conext/conext2010.html#GuoLWYKSWZ10
3850139	Xu_Chen,Yun_Mao,Zhuoqing_Morley_Mao,Jacobus_E._van_der_Merwe	2010	Declarative configuration management for complex and dynamic networks.	db/conf/conext/conext2010.html#ChenMMM10
3850141	Franck_Le,Geoffrey_G._Xie,Hui_Zhang_0001	2011	On route aggregation.	db/conf/conext/conext2011.html#LeXZ11
3850153	Ruichuan_Chen,Aman_Shaikh,Jia_Wang,Paul_Francis	2011	Address-based route reflection.	db/conf/conext/conext2011.html#ChenSWF11
3850163	Victor_Heorhiadi,Michael_K._Reiter,Vyas_Sekar	2012	New opportunities for load balancing in network-wide intrusion detection systems.	db/conf/conext/conext2012.html#HeorhiadiRS12
3850170	Chao_Zhang,Cheng_Huang,Philip_A._Chou,Jin_Li_0001,Sanjeev_Mehrotra,Keith_W._Ross,Hao_Chen,Felix_Livni,Jay_Thaler	2011	Pangolin: speeding up concurrent messaging for cloud-based social gaming.	db/conf/conext/conext2011.html#ZhangHCLMRCLT11
3850178	Denisa_Ghita,Can_Karakus,Katerina_J._Argyraki,Patrick_Thiran	2011	Shifting network tomography toward a practical goal.	db/conf/conext/conext2011.html#GhitaKAT11
3850180	Bhavish_Agarwal,Ranjita_Bhagwan,Lorenzo_De_Carli,Venkata_N._Padmanabhan,Krishna_P._N._Puttaswamy	2011	Deja vu: fingerprinting network problems.	db/conf/conext/conext2011.html#AgarwalBCPP11
3850203	Hamed_Soroush,Peter_Gilbert,Nilanjan_Banerjee,Brian_Neil_Levine,Mark_D._Corner,Landon_P._Cox	2011	Concurrent Wi-Fi for mobile users: analysis and measurements.	db/conf/conext/conext2011.html#SoroushGBLCC11
3850209	Aruna_Balasubramanian,Niranjan_Balasubramanian,Samuel_J._Huston,Donald_Metzler,David_Wetherall	2012	FindAll: a local search engine for mobile phones.	db/conf/conext/conext2012.html#BalasubramanianBHMW12
3850211	Mehdi_Nikkhah,rin,Yiu_Lee,Richard_Woundy	2011	Assessing IPv6 through web access a measurement study and its findings.	db/conf/conext/conext2011.html#NikkhahGLW11
3850230	Sivasankar_Radhakrishnan,Yuchung_Cheng,Jerry_Chu,Arvind_Jain,Barath_Raghavan	2011	TCP fast open.	db/conf/conext/conext2011.html#RadhakrishnanCCJR11
3850243	Wenxuan_Zhou,Qingxi_Li,Matthew_Caesar,Brighten_Godfrey	2011	ASAP: a low-latency transport layer.	db/conf/conext/conext2011.html#ZhouLCG11
3850248	Mustafa_Y._Arslan,Konstantinos_Pelechrinis,Ioannis_Broustis,Srikanth_V._Krishnamurthy,Sateesh_Addepalli,Konstantina_Papagiannaki	2010	Auto-configuration of 802.11n WLANs.	db/conf/conext/conext2010.html#ArslanPBKAP10
3850262	Richard_T._B._Ma,Vishal_Misra	2011	The public option: a non-regulatory alternative to network neutrality.	db/conf/conext/conext2011.html#MaM11
3850265	Maciej_Kuzniar,ni,Marco_Canini,Daniele_Venzano,Dejan_Kostic	2012	A SOFT way for openflow switch interoperability testing.	db/conf/conext/conext2012.html#KuzniarPCVK12
3850267	Shuo_Deng,Hari_Balakrishnan	2012	Traffic-aware techniques to reduce 3G/LTE wireless energy consumption.	db/conf/conext/conext2012.html#DengB12
3850270	Florian_Tegeler,Xiaoming_Fu_0001,Giovanni_Vigna,Christopher_Kruegel	2012	BotFinder: finding bots in network traffic without deep packet inspection.	db/conf/conext/conext2012.html#TegelerFVK12
3850278	Md._Sazzadur_Rahman,Ting-Kai_Huang,Harsha_V._Madhyastha,Michalis_Faloutsos	2012	FRAppE: detecting malicious facebook applications.	db/conf/conext/conext2012.html#RahmanHMF12
3850287	David_Applegate,Aaron_Archer,Vijay_Gopalakrishnan,Seungjoon_Lee,K._K._Ramakrishnan	2010	Optimal content placement for a large-scale VoD system.	db/conf/conext/conext2010.html#ApplegateAGLR10
3850288	Zhi_Wang,Baochun_Li,Lifeng_Sun,Shiqiang_Yang	2012	Cloud-based social application deployment using local processing and global distribution.	db/conf/conext/conext2012.html#WangLSY12
3850300	Hongyi_Zeng,Peyman_Kazemian,George_Varghese,Nick_McKeown	2012	Automatic test packet generation.	db/conf/conext/conext2012.html#ZengKVM12
3850301	Haitao_Wu,Zhenqian_Feng,Chuanxiong_Guo,Yongguang_Zhang	2010	ICTCP: Incast Congestion Control for TCP in data center networks.	db/conf/conext/conext2010.html#WuFGZ10
3850303	Ting_Wang,Mudhakar_Srivatsa,Dakshi_Agrawal,Ling_Liu	2010	Spatio-temporal patterns in network events.	db/conf/conext/conext2010.html#WangSAL10
3850316	Upendra_Shevade,Yi-Chao_Chen,Lili_Qiu,Yin_Zhang,Vinoth_Chandar,Mi_Kyung_Han,Han_Hee_Song,Yousuk_Seung	2010	Enabling high-bandwidth vehicular content distribution.	db/conf/conext/conext2010.html#ShevadeCQZCHSS10
3850320	Kyunghan_Lee,Injong_Rhee,Joohyun_Lee,Song_Chong,Yung_Yi	2010	Mobile data offloading: how much can WiFi deliver?	db/conf/conext/conext2010.html#LeeRLCY10
3850321	Ramin_Khalili,Nicolas_Gast,Miroslav_Popovic,Utkarsh_Upadhyay,Jean-Yves_Le_Boudec	2012	MPTCP is not pareto-optimal: performance issues and a possible solution.	db/conf/conext/conext2012.html#KhaliliGPUB12
3850334	Arpit_Gupta,Jeongki_Min,Injong_Rhee	2012	WiFox: scaling WiFi performance for large audience environments.	db/conf/conext/conext2012.html#GuptaMR12
3850341	Mustafa_Y._Arslan,Indrajeet_Singh,Shailendra_Singh,Harsha_V._Madhyastha,Karthikeyan_Sundaresan,Srikanth_V._Krishnamurthy	2012	Computing while charging: building a distributed computing infrastructure using smartphones.	db/conf/conext/conext2012.html#ArslanSSMSK12
3850349	Haitao_Wu,Jiabo_Ju,Guohan_Lu,Chuanxiong_Guo,Yongqiang_Xiong,Yongguang_Zhang	2012	Tuning ECN for data center networks.	db/conf/conext/conext2012.html#WuJLGXZ12
3850351	Bin_Fan,David_G._Andersen,Michael_Kaminsky,Konstantina_Papagiannaki	2010	Balancing throughput, robustness, and in-order delivery in P2P VoD.	db/conf/conext/conext2010.html#FanAKP10
3850352	Giuseppe_Bianchi,Pierluigi_Gallo,Domenico_Garlisi,Fabrizio_Giuliano,Francesco_Gringoli,Ilenia_Tinnirello	2012	MAClets: active MAC protocols over hard-coded devices.	db/conf/conext/conext2012.html#BianchiGGGGT12
3850353	Min_Y._Mun,Shuai_Hao,Nilesh_Mishra,Katie_Shilton,Jeff_Burke,Deborah_Estrin,Mark_H._Hansen,Ramesh_Govindan	2010	Personal data vaults: a locus of control for personal data streams.	db/conf/conext/conext2010.html#MunHMSBEHG10
3850357	Wenjie_Jiang,Stratis_Ioannidis,Ã©,Fabio_Picconi	2012	Orchestrating massively distributed CDNs.	db/conf/conext/conext2012.html#JiangIMP12
3850365	Lucian_Popa_0002,Sylvia_Ratnasamy,Gianluca_Iannaccone,Arvind_Krishnamurthy,Ion_Stoica	2010	A cost comparison of datacenter network architectures.	db/conf/conext/conext2010.html#PopaRIKS10
3850377	Vyas_Sekar,Ravishankar_Krishnaswamy,Anupam_Gupta,Michael_K._Reiter	2010	Network-wide deployment of intrusion detection and prevention systems.	db/conf/conext/conext2010.html#SekarKGR10
3850386	Brent_Stephens,Alan_L._Cox,Wes_Felter,Colin_Dixon,John_B._Carter	2012	PAST: scalable ethernet for data centers.	db/conf/conext/conext2012.html#StephensCFDC12
3850387	Yu_Jin_0001,Nick_G._Duffield,Alexandre_Gerber,Patrick_Haffner,Subhabrata_Sen,Zhi-Li_Zhang	2010	NEVERMIND, the problem is already fixed: proactively detecting and troubleshooting customer DSL problems.	db/conf/conext/conext2010.html#JinDGHSZ10
3850388	Xin_Sun_0002,Sanjay_G._Rao,Geoffrey_G._Xie	2012	Modeling complexity of enterprise routing design.	db/conf/conext/conext2012.html#SunRX12
3850395	Abhishek_Goswami,Luis_E._Ortiz,Samir_R._Das	2011	WiGEM: a learning-based approach for indoor localization.	db/conf/conext/conext2011.html#GoswamiOD11
3850401	Ki-Young_Jang,Konstantinos_Psounis,Ramesh_Govindan	2010	Simple yet efficient, transparent airtime allocation for TCP in wireless mesh networks.	db/conf/conext/conext2010.html#JangPG10
3850403	Mainack_Mondal,Bimal_Viswanath,Allen_Clement,Peter_Druschel,Krishna_P._Gummadi,Alan_Mislove,Ansley_Post	2012	Defending against large-scale crawls in online social networks.	db/conf/conext/conext2012.html#MondalVCDGMP12
3850425	Jiaxin_Cao,Chuanxiong_Guo,Guohan_Lu,Yongqiang_Xiong,Yixin_Zheng,Yongguang_Zhang,Yibo_Zhu,Chen_Chen_0019	2012	Datacast: a scalable and efficient reliable group data delivery service for data centers.	db/conf/conext/conext2012.html#CaoGLXZZZC12
3850430	Jiasi_Chen,Amitabha_Ghosh,Josphat_Magutt,Mung_Chiang	2012	QAVA: quota aware video adaptation.	db/conf/conext/conext2012.html#ChenGMC12
3850446	Balajee_Vamanan,T._N._Vijaykumar	2011	TreeCAM: decoupling updates and lookups in packet classification.	db/conf/conext/conext2011.html#VamananV11
3850447	Nikhil_Handigol,Brandon_Heller,Vimalkumar_Jeyakumar,Bob_Lantz,Nick_McKeown	2012	Reproducible network experiments using container-based emulation.	db/conf/conext/conext2012.html#HandigolHJLM12
3850462	Mike_P._Wittie,Veljko_Pejovic,Lara_B._Deek,Kevin_C._Almeroth,Ben_Y._Zhao	2010	Exploiting locality of interest in online social networks.	db/conf/conext/conext2010.html#WittiePDAZ10
